# Supplementary material for: Quantitative Classification of Rice (Oryza sativa L.) Root Length and Diameter Using Image Analysis
Source: PLoS One. 2017 Jan 19;12(1):e0169968. doi: 10.1371/journal.pone.0169968 (PMC5245893; doi:10.1371/journal.pone.0169968)
Supplement: S4 File — shows the raw data for of each root image used for Figs 2–10. (XLSX) [file pone.0169968.s004.xlsx]

## Sheet: data of images
V,N,and W denote cultivar experiment, nitrogen experiment,and water experiment. The 1st number following the letters denote different cultival, nitrogen rate or water regime, respectively. And the 2nd number denotes different replication.
		Exp 1	FLR		TLR		NR					Exp 2	FLR		TLR		NR					Exp 3	FLR		TLR		NR					Exp 4	FLR		TLR		NR					Exp 5	FLR		TLR		NR
		Image ID	Length	surface area	Length	surface area	Length	surface area				Image ID	Length	surface area	Length	surface area	Length	surface area				Image ID	Length(cm)	surface area(cm2)	Length(cm)	surface area(cm2)	Length(cm)	surface area(cm2)				Image ID	Length(cm)	surface area(cm2)	Length(cm)	surface area(cm2)	Length(cm)	surface area(cm2)				Image ID	Length(cm)	surface area(cm2)	Length(cm)	surface area(cm2)	Length(cm)	surface area(cm2)
2007-07-22	V11	101001	37.557	0.5598	3.4539	0.1505	54.7096	13.2423		2009-07-24	V11	201001	1930.14	28.8944	665.203	30.2114	261.291	43.1529		2007-07-19	N11	3010101	673.942	10.0181	118.553	5.3617	104.026	12.8781		2007-07-25	N11	401001	780.89	12.4947	137.053	6.468	114.222	16.6901		2007-07-28	w21	501001	626.829	9.8308	197.42	8.9629	72.9321	12.0548
		101002	1320.8	19.5498	221.858	9.8842	146.542	28.6683				201002	2682.26	39.3334	764.891	34.7591	239.893	39.8676				3010102	759.804	11.1442	152.591	6.7034	100.52	12.6283				401002	962.597	15.4309	136.983	6.5181	51.7272	6.4273				501002	723.466	11.1594	180.917	8.2412	114.613	20.4872
		101003	1069.27	16.1061	214.794	9.6393	179.76	33.0111				201003	2983.94	42.9333	754.617	34.153	188.621	29.929				3010103	1460.25	21.4902	254.825	11.0318	89.0524	10.7049				401003	245.7	3.8561	66.1325	2.9852	31.4331	6.0822				501003	650.65	10.4975	172.422	7.6822	105.715	19.4253
		101004	678.805	10.2753	95.7158	4.2823	158.48	33.4278				201004	3314.34	47.7977	823.238	37.5276	336.165	58.0458				3010104	1434.43	19.8121	206.403	10.3218	55.3101	8.4538				401004	1216.39	17.6173	314.66	14.4736	159.491	25.4439				501004	405.818	6.2236	105.075	4.961	42.479	5.4098
		101005	1276.94	18.6299	249.726	11.7964	116.464	17.1393				201005	2794.09	39.8465	699.776	31.8249	218.901	34.1242				3010105	1365.58	18.7311	231.628	10.4142	48.0914	8.1303				401005	1136.42	16.5609	205.72	9.3271	106.214	14.4928				501005	1027.08	15.3606	181.452	8.0475	120.538	22.4243
		101006	1767.67	25.2192	272.264	12.6245	152.401	25.8546				201006	2594.84	37.0617	656.988	29.8612	191.388	32.4147			N12	3010106	431.568	6.6419	88.1468	4.0451	49.8081	5.2261				401006	2235.06	30.518	254.062	11.6769	205.21	28.0919				501006	1439.6	21.4167	309.3	14.1498	114.985	18.955
		101007	1527.66	21.9195	226.935	10.4853	108.165	12.8315				201007	2473.62	35.52	559.093	25.2735	304.246	63.3378				3010107	1586.18	23.0466	241.887	10.8874	43.0124	4.249				401007	1478.94	21.1874	313.39	14.0572	220.703	35.9436				501007	1504.58	22.064	273.789	12.7157	79.049	11.2041
		101008	1456.36	20.565	208.675	9.777	151.386	18.4275				201008	3058.49	44.422	840.355	37.9574	304.19	56.377				3010108	1847.42	26.2398	308.944	13.9825	97.9271	13.0978			N12	401008	911.738	14.5116	167.071	7.969	174.273	28.9863				501008	1705.69	24.7198	281.906	13.0922	101.672	19.6034
		101009	260.452	4.0511	28.3922	1.2064	123.917	25.9051				201009	3213.93	46.0892	834.417	38.2391	317.831	54.1241				3010109	1454.83	17.4838	266.022	11.498	125.252	17.9186				401009	864.691	12.6713	172.518	7.8187	49.2127	8.2184				501009	1269.39	18.8527	287.072	13.5279	49.9699	8.6563
		101010	79.5339	1.2447	5.661	0.2449	23.4164	5.7936				201010	3071.44	43.3205	803.55	37.0475	179.624	22.2479			N13	3010110	714.79	10.6753	138.962	6.0464	137.353	16.376				401010	1498.73	21.6164	414.728	18.8554	163.557	21.725				501010	1489.91	21.1334	209.456	9.5629	80.2265	13.3603
		101011	354.399	5.5038	67.9118	3.0373	102.559	21.0135				201011	1391.39	20.7075	424.144	18.8996	350.06	71.0528				3010111	1158.76	17.2043	217.623	9.3989	124.287	16.9687				401011	2447.48	33.1899	397.189	18.4038	268.771	43.6286				501011	1737.6	25.0947	281.615	13.141	91.8891	14.1882
		101012	1657.84	23.0826	256.555	11.5466	144.272	25.0166				201012	1564.23	23.7107	465.246	20.7955	322.914	58.8181				3010112	1524.37	21.894	227.002	11.2762	85.5302	15.3547				401012	1678.35	23.2895	252.495	11.5957	185.186	24.7468				501012	1710.34	25.9914	413.227	19.4078	149.632	25.4415
	V12	101013	866.52	12.5694	153.433	6.9413	132.372	23.7903				201013	1747.29	25.8898	523.483	23.2669	200.874	38.7564				3010113	1343.08	20.1386	226.412	10.59	85.8299	12.5603			N13	401013	2755.81	37.4586	707.42	32.1074	320.069	52.0329				501013	951.033	13.7028	116.069	5.2664	138.721	22.1596
		101014	1685.09	23.7283	285.722	12.9043	122.21	18.1236			V12	201014	1625.67	23.6654	383.479	16.9617	338.537	63.3984			N21	3010114	1438.03	22.0153	291.772	13.2624	140.798	25.7505				401014	2001.41	26.5241	480.607	22.1714	230.756	35.1011				501014	2080.96	30.8566	376.39	17.2249	86.7585	11.6627
		101015	1348.6	18.9253	198.009	8.852	185.027	32.9288				201015	2800.22	40.7458	838.893	38.183	160.787	23.3479				3010115	2032.18	29.3034	387.4	16.8375	98.8009	14.056				401015	1630.77	22.1817	432.176	20.0123	211.829	34.3651				501015	2375.65	34.6106	364.867	17.082	106.659	13.9081
		101016	1223.61	17.348	214.459	9.7352	165.336	28.0794				201016	3080.79	44.3353	872.577	39.834	245.845	39.5157				3010116	1731.08	24.7376	395.586	18.0692	167.498	32.2301				401016	924.011	16.0039	316.798	14.8513	232.346	31.9621				501016	1784.98	27.1155	377.726	17.5408	75.2781	12.0929
		101017	1761.41	24.3331	270.936	12.3598	164.847	25.6062				201017	2791.27	40.7367	817.432	36.4347	233.099	41.5131				3010117	1283.39	19.2626	293.669	15.6454	196.565	31.0673			N21	401017	1310.36	23.3161	428.314	20.8209	212.263	25.8951				501017	1268.41	19.8557	262.298	12.1766	50.8824	7.427
		101018	1113.92	15.6213	167.483	7.7692	105.266	16.7483				201018	2867.04	41.8931	875.355	39.6838	181.174	26.479				3010118	1489.57	25.7545	297.575	17.6753	198.844	23.5998				401018	233.626	4.0869	142.318	6.3848	33.1246	7.5567			w22	501018	688.082	10.0395	103.056	4.7183	116.541	17.9792
		101019	814.4	12.0123	133.593	5.9658	121.784	21.9349				201019	2374.12	34.3234	626.859	28.2621	250.221	41.046				3010119	558.748	8.8272	245.997	6.8556	53.4932	4.2885				401019	686.737	11.0837	200.18	8.9044	199.81	38.573				501019	775.745	11.1681	132.645	5.8989	94.1023	18.544
		101020	1213.8	17.9306	233.853	10.7208	84.4759	10.261				201020	1355.49	20.0909	277.507	11.8198	337.511	65.0403			N22	3010120	802.74	14.0358	302.159	13.7403	133.125	20.3254				401020	1822.63	27.1707	470.807	21.7925	273.109	43.0093				501020	1490.89	21.5361	221.515	9.7079	66.6	8.8133
		101021	666.42	10.4328	138.955	6.4354	44.4455	4.8686				201021	1556.99	22.1954	272.836	11.9741	395.907	78.8202				3010121	742.935	12.8761	287.317	13.1538	148.131	25.2366				401021	211.927	3.6931	99.1806	4.4516	29.8494	6.5215				501021	1235.82	18.551	227.755	10.0521	89.9446	14.6479
	V13	101022	2560.27	36.755	697.372	32.4078	222.218	40.1286				201022	1022.72	15.6678	382.757	17.4512	148.097	23.4291				3010122	782.655	11.8567	181.326	8.3888	104.464	16.2951				401022	2704.05	39.8829	691.091	31.9727	350.847	50.9016				501022	1291.31	18.7711	201.35	9.1645	79.753	10.8654
		101023	3030.52	42.962	852.943	40.2069	208.559	27.5423				201023	2147.71	30.9606	528.999	23.7655	249.169	38.3218				3010123	1938.42	28.0451	249.601	13.0783	80.1036	11.0059				401023	2563.67	37.6844	657.109	30.3695	290.997	41.7591				501023	440.626	6.6592	76.6248	3.5629	33.3557	3.9354
		101024	1724.01	25.6755	555.66	25.2511	233.232	47.9794				201024	2702.26	38.8181	685.654	31.1907	240.936	37.756				3010124	1481.98	21.2651	321.14	11.5723	102.45	12.1493			N22	401024	2067.76	32.4121	559.764	26.2945	217.192	27.0084				501024	1619.47	23.1063	210.269	9.5895	28.8047	3.1996
		101025	2759.64	40.4478	870.582	40.1731	149.997	22.446				201025	2468.28	35.4453	618.826	27.7788	213.744	39.9777				3010125	1236.59	15.0449	222.888	11.1704	100.676	13.7876				401025	289.549	5.0328	104.606	4.8864	36.3689	5.9211				501025	1443.24	21.5697	196.921	9.0857	14.9817	1.632
		101026	2825.49	41.5867	908.421	41.7521	169.016	25.4562				201026	2661.9	38.3607	793.118	35.834	243.699	40.9829				3010126	1399.67	20.2056	223.569	10.2139	78.0508	12.4862				401026	1112.78	17.6891	309.304	14.1502	207.169	26.9343				501026	1742.28	23.704	187.098	8.842	45.0607	5.5662
		101027	2116.59	30.7342	548.982	25.0042	232.448	36.8415				201027	2239.54	32.131	550.706	24.7211	217.273	37.0319			N23	3010127	861.823	13.285	166.782	7.6424	152.285	26.5828				401027	1217.26	18.937	352.589	16.5265	171.546	26.305				501027	879.91	13.3196	144.981	6.7314	101.983	20.0162
		101028	1271.95	18.5202	251.053	10.9681	333.217	68.1107			V13	201028	1661.42	23.6223	276.424	12.6541	126.285	23.4459				3010128	1087.11	16.2932	210.748	9.8494	158.498	26.0791				401028	359.872	6.3042	141.923	6.5542	36.1863	7.4723				501028	1109.92	16.3357	183.201	8.6753	106.144	19.637
	V21	101029	1438.03	21.0153	291.773	13.2624	140.798	25.7511				201029	1351.52	19.3678	213.344	9.7011	161.959	30.8613				3010129	1574.03	22.9838	305.021	14.2798	132.032	14.3417				401029	1204.13	19.2171	343.49	15.9219	237.523	40.2311				501029	1607.06	23.0137	265.151	12.5775	88.4199	10.799
		101030	2032.18	29.3034	366.4	16.8375	98.8009	14.0563				201030	1226.25	17.7536	231.068	10.669	144.723	26.3163				3010130	1606.19	23.4388	325.411	15.5172	122.61	14.0837				401030	309.571	5.2093	91.8158	4.3729	33.5291	5.9241				501030	1639.9	23.5	286.353	13.6674	82.1102	10.6047
		101031	1731.08	24.3376	390.587	18.0692	167.498	32.2309				201031	2439.92	35.2896	804.883	39.9861	230.583	34.0957				3010131	543.262	9.0755	130.14	6.7644	81.3626	11.2005				401031	292.17	4.9587	88.7123	4.1356	34.0735	5.5742				501031	554.664	9.0992	131.063	5.958	54.4873	8.875
		101032	1280.89	18.2626	253.669	11.6454	166.565	31.068				201032	2345.78	33.89	592.631	28.9695	220.942	41.4097				3010132	667.874	14.7742	124.305	8.3201	100.762	16.2681				401032	2015.07	30.7519	436.443	19.8792	235.278	35.2098				501032	681.849	11.2033	168.907	7.8039	72.22	12.2495
		101033	1489.57	20.7745	297.526	14.3353	166.035	30.7204				201033	2594.46	37.7822	769.481	37.7825	185.775	30.0182				3010133	1600.71	23.9239	336.592	12.2502	141.45	33.1368				401033	1369.84	21.0274	365.352	17.0125	186.134	32.2997				501033	1101.57	16.7191	216.757	10.3488	83.236	11.9683
		101034	1399.67	20.2052	262.569	12.2135	98.051	13.4859				201034	2818.5	41.3875	785.206	36.4917	166.957	34.2614			N31	3010134	1423.16	21.1089	297.962	13.3127	160.497	22.6442			N23	401034	1679.68	25.6069	616.221	28.8265	371.952	61.1525				501034	556.191	8.8505	125.175	6.0384	29.1269	3.2291
		101035	1423.16	21.1085	297.962	13.3127	160.496	27.6442				201035	2325.24	34.4511	747.6	35.091	220.125	41.7711				3010135	1415.53	20.5423	256.478	12.0586	90.2393	10.4693				401035	1736.53	26.0675	676.527	31.4182	312.28	56.8895				501035	819.587	14.0726	262.663	12.1019	89.1526	15.3038
	V22	101036	1415.53	20.5419	256.478	12.0586	90.2391	10.4693				201036	2865.67	41.8711	809.836	38.0742	134.677	22.8118				3010136	105.452	1.6676	15.4868	0.6761	28.9957	6.8657				401036	2052.02	30.882	694.445	32.4272	287.321	43.7868				501036	748.317	12.91	249.76	11.5853	99.2017	19.0017
		101037	105.452	1.6676	15.4868	0.6761	28.9956	6.8657				201037	2680.71	39.4545	818.609	38.1294	168.79	29.2465				3010137	142.124	2.2756	22.463	0.9776	46.8225	10.7036				401037	1579.06	24.4315	628.964	29.0691	353.449	50.9902				501037	507.456	8.8311	174.575	8.2586	78.479	12.2574
		101038	803.358	13.052	231.092	10.278	116.519	17.5982				201038	2462.01	36.3692	712.249	33.1184	168.452	30.7762				3010138	803.359	13.0522	231.092	10.278	116.519	14.5982				401038	1907.72	28.8159	639.545	29.84	324.039	44.5824				501038	1078.12	15.9478	203.18	9.272	114.296	24.0638
		101039	936.268	15.6001	315.773	14.098	77.1543	10.5043				201039	2356.09	35.2171	745.837	34.292	183.528	37.4105				3010139	936.269	15.6004	315.773	14.098	77.1545	10.5043				401039	260.978	4.4337	141.299	6.3505	69.9587	14.8101			w23	501039	854.233	13.5919	188.237	8.852	185.886	47.1307
		101040	679.177	10.9057	200.756	9.0102	86.5641	15.0511				201040	1274.7	18.9532	270.496	12.0201	291.674	63.8342				3010140	679.178	10.9059	200.757	9.0102	86.5643	15.0011			N31	401040	459.477	8.777	113.382	5.3489	162.949	27.608				501040	2115.7	32.8372	466.74	22.042	128.617	18.5767
		101041	628.517	10.0833	177.327	7.7615	131.59	24.0815				201041	1738.15	25.2983	336.94	15.3587	306.747	60.9785				3010141	628.517	10.0835	177.327	7.7615	131.59	24.0815				401041	1254.93	23.0414	297.584	14.2718	186.885	28.9968				501041	1617.45	25.8674	395.669	18.5428	110.224	15.7761
		101042	1289.11	19.3475	280.33	12.5239	107.19	17.4478				201042	1354.86	19.9108	284.783	12.9765	235.421	49.3139				3010142	1289.11	19.3478	280.331	12.5239	107.191	17.4478				401042	2119.58	35.865	430.514	20.7853	182.691	22.9486				501042	1223.81	19.5393	293.629	13.8978	149.886	30.8891
		101043	988.375	14.6417	184.551	8.3243	130.267	22.8668				201043	662.407	10.0892	181.744	8.2276	154.811	34.3002				3010143	988.375	14.642	184.551	8.3243	118.267	12.0668				401043	2111.42	33.9343	417.338	19.9051	206.001	27.1508				501043	689.194	11.4141	147.44	6.8765	39.6973	4.8802
		101044	1945.99	29.0413	435.945	20.0614	120.772	15.8315				201044	2024.27	29.5714	570.458	27.785	310.794	49.0584				3010144	1946	31.0818	435.946	21.3214	50.5219	8.7315				401044	153.972	2.5548	44.8078	1.9248	20.2909	3.16				501044	780.153	11.8867	144.259	6.3815	138.89	20.8793
		101045	805.955	12.7926	186.718	8.1856	100.851	16.9519				201045	1880.02	27.2895	450.414	21.0366	349.757	53.135				3010145	251.935	4.6364	49.8333	2.4315	51.6374	8.7558				401045	1893.98	29.2975	405.165	18.3225	224.31	35.7824				501045	1264.72	19.1566	225.918	9.9198	111.224	16.8444
	V23	101046	424.988	6.6755	80.5163	3.482	122.185	18.6233			V21	201046	956.514	14.2747	262.703	12.1866	168.595	26.7667			N32	3010146	805.954	12.7928	186.718	8.1858	100.852	16.9513				401046	2220.62	32.743	393.41	17.8338	229.085	33.9794				501046	1663.76	24.3785	287.561	12.9563	90.9185	14.7482
		101047	1839.83	27.2139	349.334	16.1504	99.9811	14.2219				201047	1418.76	20.4043	401.171	18.8474	172.2	23.1208				3010147	424.988	6.6756	80.5163	3.4821	122.185	18.6227				401047	2431.02	35.829	452.014	20.8296	193.563	26.5044				501047	1585.09	23.5703	286.429	13.0762	79.8373	11.1189
		101048	1078.64	15.5951	151.958	7.1266	116.021	16.4376				201048	1590.38	22.4736	420.933	20.4629	206.677	30.0318				3010148	1839.83	27.2143	349.334	16.1508	99.9812	14.2214				401048	164.738	2.8159	47.4981	2.0513	20.2619	3.9702				501048	2016.38	30.0788	320.721	14.7549	104.338	17.0099
		101049	1454.57	21.7054	264.693	11.7824	82.7984	10.7511				201049	1934.38	27.829	441.646	20.2601	188.23	31.7097				3010149	1078.64	15.5954	151.958	7.1268	116.021	16.437				401049	440.509	7.4995	135.201	5.9592	119.163	23.6239				501049	1840.27	27.951	314.06	14.7627	59.5062	7.2844
		101050	829.951	12.8548	191.744	8.7288	55.8422	7.5068				201050	2693.71	37.5225	533.233	24.7421	283.047	40.2495				3010150	1454.57	21.7058	264.693	11.7827	82.7985	10.7507				401050	120.688	1.8911	18.5786	0.8063	36.997	9.9221				501050	1785.73	26.2799	273.682	12.9128	51.9903	6.5013
		101051	262.005	4.3363	55.0832	2.4315	101.637	19.7558				201051	2503.11	35.3718	541.817	24.8067	279.198	46.2057				3010151	829.951	12.855	191.744	8.729	55.8423	7.5065				401051	237.782	4.2301	97.4828	4.3446	26.2412	4.6127				501051	2158.08	31.5511	351.124	16.6433	94.2927	15.1209
		101052	891.277	14.2572	207.997	9.2776	115.093	14.9947				201052	2109.41	29.9942	492.558	22.8171	182.891	33.4579				3010152	891.277	14.2574	207.997	9.2778	115.093	14.9942				401052	763.396	13.0432	258.022	11.4677	138.298	25.6471				501052	1550.33	22.7585	310.347	14.5547	92.4448	13.7648
		101053	1385.48	21.5199	325.646	14.6458	96.1514	12.374				201053	2473.02	34.2528	490.775	22.7092	237.591	43.3548				3010153	1385.48	21.5203	325.646	14.6462	96.1515	12.3736				401053	184.619	3.5008	142.078	6.3436	90.6442	20.8567				501053	2075.61	30.4111	276.425	12.9399	76.9897	8.9026
		101054	949.711	14.9456	185.884	8.5625	61.9353	6.3758				201054	2070.02	29.3599	440.802	20.4558	217.465	39.3997				3010154	949.711	14.2758	218.884	8.5627	61.9354	6.3756				401054	329.969	5.914	120.955	5.3585	89.0091	17.0195				501054	1425.5	21.1416	257.759	11.5416	124.259	21.4652
		101055	1171.72	17.197	198.785	9.2685	118.571	16.0286				201055	2222.02	31.515	506.3	23.4629	205.052	33.731				3010155	383.609	4.0231	223.511	8.7335	93.1405	17.0675				401055	180.328	3.0922	55.9198	2.4103	23.7088	4.618			w31	501055	2285.6	34.8183	482.214	21.577	221.905	38.3961
		101056	1161.44	17.7585	243.189	11.1879	93.894	13.635				201056	2480.45	35.4272	521.325	23.8708	212.528	35.1489			N33	3010156	1171.72	17.197	198.785	9.2685	118.571	16.0286				401056	1814.96	27.3056	329.05	15.1032	191.902	27.2125				501056	1828.73	28.7183	558.524	25.3327	222.736	40.8249
		101057	1008.84	15.4488	208.105	9.4201	148.16	23.4656				201057	1953.78	27.7894	435.392	20.407	173.968	27.7149				3010157	1161.44	17.7585	243.189	11.1879	93.894	13.635			N32	401057	1770.9	27.4156	447.733	20.8855	246.951	36.4812				501057	1877.48	29.0377	503.528	23.1461	161.194	28.7057
		101058	941.94	14.2763	187.049	8.611	121.798	19.2217				201058	2425.39	34.6661	544.474	25.3519	196.593	27.5608				3010158	1008.84	15.4488	208.105	9.4201	148.16	23.4656				401058	1215.48	19.8269	420.122	19.6741	206.077	27.6971				501058	3807.76	54.9944	767.999	36.7906	199.407	31.7083
		101059	142.124	2.2756	22.463	0.9776	46.8224	10.7036				201059	2533.5	36.0953	587.637	27.2504	218.869	35.5105				3010159	941.94	14.2763	187.049	8.611	121.798	19.2217				401059	1705.59	25.1145	374.001	16.9787	366.938	71.0116				501059	2718.2	38.9987	473.914	22.8263	107.504	14.4471
	V31	101060	1262.97	18.9986	374.185	18.3714	139.693	27.773				201060	2735.55	39.0617	595.235	27.2085	272.097	44.6287				3010160	1423.16	21.1085	297.962	13.3127	160.496	27.6442				401060	339.243	5.6214	150.676	7.0174	27.0714	3.6964				501060	3298.47	48.1665	651.357	30.6477	182.327	30.2346
		101061	466.298	7.2205	123.688	6.4379	58.4944	15.0893			V22	201061	2826.01	40.0563	728.506	33.671	252.394	37.2563				3010161	1415.53	20.5419	256.478	12.0586	90.2391	10.4693				401061	927.89	14.4996	248.727	11.2469	227.069	31.6329				501061	1157.05	16.2418	183.006	8.2834	52.778	8.4207
		101062	1544.4	21.7958	375.644	18.3462	168.267	37.1046				201062	2247.27	31.7102	490.844	22.5492	299.938	51.9287				3010162	2199.38	42.5262	475.433	24.3975	409.842	76.352				401062	841.298	12.9817	205.372	9.3457	172.917	25.4878				501062	1800.03	24.6022	183.673	8.4966	42.882	4.6972
		101063	2190.65	30.9664	519.431	27.202	100.245	18.1593				201063	2384.43	33.6216	468.621	21.2692	272.659	50.8624		2007-07-28	N11	3020001	1188.45	17.0937	229.423	10.5125	96.8044	13.4777				401063	172.443	2.8781	59.9621	2.6871	28.0743	5.8403				501063	1346.73	19.0472	197.063	8.8019	45.7891	5.2586
		101064	1874.97	25.9881	411.616	20.8846	154.441	34.5502				201064	2368.55	33.1156	459.837	20.981	263.296	43.8748				3020002	1335.62	18.9091	257.923	11.4307	116.447	17.6717				401064	1742.93	26.7228	515.481	24.1738	128.971	14.8251				501064	699.997	9.8863	72.9077	3.3488	81.6828	16.3753
		101065	1789.29	25.1677	407.002	21.2463	139.697	35.4125				201065	1931.87	27.5068	427.355	19.5174	260.587	46.4307				3020003	1153.4	16.3369	193.376	8.6774	95.5051	13.0097				401065	1862.01	28.0719	517.412	23.782	134.913	22.9118				501065	1505.06	22.0395	229.107	10.4532	68.6342	12.866
		101066	1552.74	21.8757	355.423	18.2711	165.238	40.2176				201066	2664.33	37.2666	589.52	27.5709	282.5	49.8946				3020004	2067.67	28.5161	336.77	15.5024	76.9502	9.5007				401066	1351.99	21.1906	485.275	22.2487	177.414	33.0738				501066	2126.9	30.7315	287.706	13.271	48.1619	7.023
		101067	1199.43	17.1022	262.98	13.5058	174.951	43.4987				201067	2919.03	40.671	521.222	23.7541	312.88	50.9069				3020005	1152.04	17.1226	275.657	12.3867	50.6256	5.9822				401067	1192.89	18.3331	305.755	14.1321	188.275	35.3913			w32	501067	1719.77	22.0191	348.166	16.4166	95.379	18.5488
		101068	1553.02	22.2762	354.99	18.1217	82.7301	18.1285				201068	1797.2	25.8713	396.698	17.8001	233.073	40.8511				3020006	2088.14	28.5774	445.021	20.6135	104.263	7.9258				401068	1309.33	20.279	430.485	19.9412	149.327	25.6806				501068	1272.52	16.5228	226.119	10.5803	94.8477	17.8796
		101069	1848.37	25.5937	377.074	19.4945	66.4546	10.0235				201069	1971.57	28.6792	549.6	25.7588	165.933	20.4515				3020007	1899.86	26.1328	406.504	18.9478	56.2663	11.7695			N33	401069	1799.23	28.1476	808.573	36.9141	272.566	50.4065				501069	1479.84	18.7954	265.212	13.0242	94.5457	17.6796
		101070	2203.31	30.5369	428.818	22.2861	81.7709	14.2166				201070	1788.83	25.9375	429.662	19.5964	255.143	37.7841				3020008	1278.43	18.1061	320.493	14.4199	84.2405	8.3412				401070	456.062	7.9014	292.593	13.6369	67.1362	9.5704				501070	1390.53	18.2804	234.052	11.0964	55.8334	7.7611
		101071	1516.28	21.4623	343.061	17.5765	127.81	31.7088				201071	2286.01	32.6983	570.083	26.4345	227.588	31.9941				3020009	659.951	9.9993	143.876	6.5002	44.7143	5.0399				401071	978.141	15.3958	375.937	17.5298	141.085	24.3982				501071	1413.86	19.0976	265.6	12.0951	91.3918	15.9092
		101072	1754.6	24.7402	446.344	23.4781	108.605	24.0418				201072	2535.83	35.9468	543.548	24.9413	209.493	28.5143				3020010	1921.44	25.4462	281.958	11.6297	20.1842	7.4729				401072	1377.6	21.8147	560.528	25.9643	127.572	15.2555				501072	1406.29	18.585	228.622	10.9557	51.385	6.0251
	V32	101073	2461.36	34.1602	471.717	24.0893	78.991	10.529				201073	2451.06	34.7338	573.505	26.5532	194.515	24.6698			N12	3020011	1179.66	16.8417	207.975	8.9798	113.064	16.3446				401073	538.612	8.4565	197.946	9.1693	170.514	32.5142				501073	104.763	1.5087	13.8048	0.6143	16.511	3.9512
		101074	2095.42	29.6234	432.782	22.6339	73.6072	9.105			V23	201074	2300.95	33.7548	603.046	28.25	110.384	14.5692				3020012	1153.4	16.3369	193.376	8.6774	95.5051	13.0097				401074	1253.73	18.9819	389.586	18.127	247.23	38.2502				501074	141.196	2.0588	20.0233	0.8882	26.6622	6.1599
		101075	1842.57	25.8533	367.928	19.4032	45.5308	6.3637				201075	1674.96	23.8114	211.969	9.7133	375.035	72.9476				3020013	1170.8	16.746	255.754	11.9935	69.0095	9.3635				401075	1200.15	18.9326	495.25	22.5342	355.42	64.332				501075	798.112	11.8086	205.993	9.338	66.3497	10.1277
		101076	1271.66	18.2934	297.471	14.8768	158.534	42.9745				201076	1590.54	22.1753	203.669	9.5536	321.552	56.8751				3020014	1420.64	19.8998	202.52	9.3512	80.2596	12.1182				401076	131.813	2.147	56.0223	2.4551	24.6373	5.1845				501076	930.154	14.114	281.477	12.8086	43.9341	6.0452
		101077	2461.36	34.1602	471.717	24.0893	78.991	10.529				201077	1533.03	22.4222	378.577	17.7024	242.724	37.6746				3020015	2003.94	27.4632	401.7	18.3643	86.0448	12.913				401077	964.579	15.0438	336.885	15.5808	259.57	51.3632				501077	674.742	9.8668	178.952	8.1861	49.2924	8.6619
		101078	2095.42	29.6234	432.782	22.6339	73.6072	9.105				201078	1838	26.4748	329.39	15.1599	286.324	51.1643				3020016	1588.53	22.1515	298.445	13.9596	126.713	17.6679				401078	188.347	3.2058	99.0856	4.5606	31.6715	5.8479				501078	624.413	9.1227	158.068	7.0516	74.9317	13.8589
		101079	1842.57	25.8533	367.928	19.4032	45.5308	6.3637				201079	2442.75	34.0369	396.759	18.9186	308.44	43.8832				3020017	1283.85	17.8525	238.026	11.1544	123.481	17.7281				401079	1058.05	16.351	368.333	16.9672	202.442	31.5979				501079	1280.69	17.5044	249.884	11.3784	61.0377	10.0412
		101080	1271.66	18.2934	297.471	14.8768	158.534	42.9745				201080	2034.46	29.3291	457.9	21.8471	192.684	25.4515				3020018	1750.7	24.5355	311.464	14.4117	69.2548	8.9156				401080	1279.42	19.2803	379.998	17.6767	239.686	41.1978				501080	981.92	13.2469	164.507	7.5629	74.1781	13.1598
		101081	1067.23	16.0934	252.852	12.7354	89.6133	17.9418				201081	2402.92	34.4028	477.146	22.4632	216.139	35.5237				3020019	889.352	12.756	162.948	7.4064	123.353	26.741				401081	1338.87	20.2496	415.036	19.3742	227.853	36.4275				501081	1933.29	26.2747	388.598	18.2265	68.7713	9.111
		101082	1735.45	24.6422	363.328	18.5932	123.695	25.5771				201082	3937.31	55.5899	865.023	41.7624	271.132	34.0624				3020020	1244.12	21.4566	306.792	14.9028	144.315	15.0519				401082	1459.39	22.0617	452.227	21.1636	246.616	36.9973				501082	800.691	11.5739	166.439	7.4369	57.428	9.7558
		101083	69.2241	1.026	7.3807	0.3836	50.2766	15.7121				201083	1355.2	19.7217	417.643	20.3626	205.791	42.1852			N13	3020021	967.048	13.9976	208.999	9.6187	95.7825	13.9513		2007-08-07	N11	402001	703.265	10.8605	316.302	14.6009	52.4244	8.917				501083	422.213	6.0396	71.7716	3.1635	69.5762	10.7177
	V33	101084	1767.82	25.0233	362.379	18.1362	78.6252	16.2856				201084	1357.72	19.7487	394.761	19.2182	165.689	29.1499				3020022	1605.54	22.7423	248.069	11.2385	79.1709	11.8939				402002	489.914	7.2543	163.295	7.3958	43.4968	7.3394				501084	1827.81	24.6214	311.393	14.6733	56.9325	8.1847
		101085	1310.81	19.1359	288.302	14.6174	101.973	19.0426				201085	2103.64	30.023	604.74	29.4985	163.194	29.2828				3020023	1945.44	26.8332	264.993	11.5604	83.5337	12.5877				402003	890.375	12.6177	269.01	12.7895	42.322	4.9348				501085	1071.59	14.1094	135.454	6.4748	66.066	9.4598
		101086	2058.35	28.6598	461.575	23.4756	177.344	36.5068				201086	1890.09	26.5926	494.602	24.022	161.26	27.9469				3020024	1024.24	14.5032	152.527	7.1825	143.718	21.0574				402004	931.257	12.9633	279.521	13.2814	152.637	23.0894				501086	1445.07	19.6376	235.945	10.7048	47.1481	6.1872
		101087	1843.61	26.1375	414.336	21.2807	99.2931	17.3683				201087	1533.67	22.5245	484.202	23.9112	145.993	25.3527				3020025	1713.39	24.116	267.281	12.0038	57.0897	6.5294				402005	348.252	5.1611	115.481	5.5835	141.259	21.2627				501087	824.531	11.6302	170.919	7.9304	31.7983	4.3202
		101088	1734.7	24.2192	422.079	22.0114	169.511	33.0986				201088	1893.32	27.1716	514.736	24.8264	115.51	25.6677				3020026	886.014	13.1152	169.562	8.0384	107.901	16.2705				402006	1000.07	14.2278	273.721	12.6424	133.742	18.0603			w33	501088	341.809	6.0227	65.4922	2.9346	79.7125	16.2722
		101089	1309.76	18.6754	247.757	12.4663	154.962	32.5871				201089	2523.15	35.5703	629.876	30.6058	121.298	21.7746				3020027	624.176	9.6406	219.972	10.3125	88.3506	13.869				402007	1205.61	17.2125	382.99	17.9522	103.062	13.8278				501089	1162.75	19.8017	247.302	11.1974	90.2653	12.3507
		101090	1158.63	17.0539	332.314	17.4302	83.2426	17.3782				201090	2190.32	30.9569	650.963	31.4188	120.853	25.2315				3020028	2003.8	28.281	452.594	21.0135	58.755	8.9596				402008	1655.36	22.54	416.836	19.1952	83.8947	12.6049				501090	1807.48	29.8888	387.183	17.6764	75.41	10.1921
		101091	812.327	12.0843	240.781	12.8627	110.731	26.0134			V31	201091	1059.11	15.5726	354.889	17.898	125.242	33.1588				3020029	1429.14	20.9904	359.562	16.7976	67.4158	8.0361				402009	831.603	11.8653	274.192	12.8635	83.018	11.1265				501091	1238.98	20.7578	221.01	10.3343	48.5749	5.2515
		101092	2256.2	32.5386	822.953	43.5783	224.983	46.1124				201092	790.031	11.4647	293.351	14.6818	112.45	32.9621				3020030	1155.56	17.0176	218.767	10.0758	34.1559	3.0772				402010	1352.95	18.724	394.952	18.4789	135.09	22.8498				501092	1528.61	23.8848	236.35	11.1864	92.9931	13.2023
		101093	2960.71	41.6944	773.444	40.3025	126.837	21.3569				201093	1930.78	27.4586	430.186	21.4162	123.356	25.9355				3020031	1364.31	20.4729	243.161	11.0692	24.1172	2.218				402011	1778	24.399	456.744	21.1807	106.876	15.4583				501093	1515.2	24.6646	289.144	13.503	73.6396	11.2307
		101094	2920.28	40.5918	799.834	41.7841	218.903	41.0156				201094	1733.55	24.9478	372.907	17.9281	109.388	26.8949				3020032	535.353	7.2705	278.514	12.3438	75.0102	7.2441				402012	340.829	5.2835	122.371	5.3643	48.9757	11.5194				501094	1316.12	21.4567	247.43	11.3694	116.199	19.3279
		101095	2903.41	40.3776	797.898	41.7678	209.708	39.3903				201095	1643.17	23.3829	377.986	18.128	87.2928	22.0616			N21	3020033	91.5694	1.5932	27.3048	1.2033	119.143	32.3919				402013	526.021	8.1471	223.125	10.2663	37.5081	6.2982				501095	1228.85	19.8282	222.395	10.3929	95.5243	15.8323
		101096	3081.03	43.3191	835.668	43.221	158.662	26.1361				201096	1117.83	16.4901	383.805	19.1567	126.693	27.943				3020034	440.475	6.5083	131.231	6.6522	33.8976	6.7856				402014	750.489	11.345	287.459	12.7451	154.694	25.4801				501096	1876.04	29.188	346.909	16.0068	110.426	21.2104
		101097	2137.75	30.3191	717.132	37.1186	257.914	54.9981				201097	1672.23	23.7371	401.295	20.5257	175.935	35.0326				3020035	498.363	7.4048	167.367	7.7693	37.7856	7.2201			N12	402015	679.179	10.6362	180.631	8.252	83.6398	14.0976				501097	2651.17	40.6993	435.638	20.3217	77.488	11.5777
2007-07-30	V11	102001	800.351	11.8438	138.331	6.0534	175.72	32.4048				201098	1320.14	18.9743	348.671	17.7007	124.632	22.3066				3020036	285.453	4.5604	110.51	5.4416	33.6206	5.0817				402016	328.15	5.0609	71.9121	3.2575	18.66	3.8255				501098	2258.35	33.8023	464.396	21.8082	131.366	26.5476
		102002	1179.85	17.1778	258.377	11.5636	157.87	24.9182				201099	1935.3	26.9777	420.871	20.724	197.815	37.3444				3020037	456.294	6.9391	126.867	5.6514	25.977	3.6978				402017	1178.66	16.9572	230.951	11.0012	60.6382	9.0664				501099	1671.04	25.3648	301.605	14.0552	130.635	25.5897
		102003	498.734	7.4874	87.3628	3.9228	98.5491	19.7148				201100	2066.78	29.2537	479.544	24.9379	205.822	38.9402				3020038	658.601	9.8266	168.281	7.7549	35.8336	5.4305				402018	854.233	12.7175	172.938	7.9603	72.4485	10.1844				501100	1943.27	28.8535	353.749	17.3017	130.219	25.3034
		102004	868.041	12.6901	173.772	7.8854	140.856	26.9807				201101	1551	21.8484	387.36	19.6334	159.096	29.2767				3020039	713.83	10.8388	179.371	8.2682	22.0675	2.6761				402019	1444.25	20.4176	269.218	12.5907	79.0431	10.7254				501101	1826	28.0628	312.186	14.7408	76.8998	11.1079
		102005	47.3968	0.7904	13.7809	0.5665	86.0722	21.6198				201102	1897.28	26.1468	424.806	21.1945	199.513	38.0961				3020040	2633.96	36.5475	470.573	21.149	254.216	42.4154				402020	1026.12	14.8872	188.438	8.6335	52.5676	6.9777				501102	1856.64	29.3174	354.267	16.0675	125.875	22.7697
		102006	1083.23	15.3198	148.748	6.629	106.359	18.1399				201103	2154.8	29.8962	558.746	28.5136	185.486	29.6837				3020041	1145.59	16.3241	216.499	10.1103	155.09	28.7645				402021	726.367	10.9523	192.518	9.0485	35.4649	5.3616				501103	1846.69	28.5305	304.944	14.5539	70.7731	8.6232
		102007	1139.78	16.3376	160.244	7.0099	113.949	21.1481				201104	2343.16	33.0787	624.334	31.6033	208.215	31.0252				3020042	2333.8	32.5864	462.647	21.062	227.884	37.6746				402022	1382.54	19.7083	217.056	9.6581	52.7586	8.6452		2007-08-07	w21	502001	807.212	12.3753	149.775	7.0797	67.6702	12.8069
		102008	1390.23	20.2583	293.457	13.4181	137.067	24.459				201105	2638.6	36.8798	655.894	33.1851	218.291	30.0437				3020043	2186.88	30.5196	390.806	18.1105	212.294	33.86				402023	745.447	11.1066	146.629	6.7844	43.5794	6.5168				502002	647.156	10.1407	145.118	6.9752	70.7977	14.1364
		102009	1168.12	17.3382	240.21	11.1317	159.984	32.037				201106	1996.77	27.5455	448.897	23.0395	213.326	31.8476				3020044	2360.08	32.73	486.611	22.5057	114.626	16.8327				402024	1390.25	20.0074	255.96	11.8471	70.4477	10.4168				502003	651.645	10.1428	137.558	6.4773	51.4034	12.1329
		102010	525.27	8.1818	124.933	5.7486	173.082	41.0591				201107	2527.03	35.1544	612.195	31.2312	173.252	24.1924				3020045	1468.82	20.7001	274.451	12.4536	155.733	26.2276				402025	1761.11	24.8585	339.677	15.6441	92.0465	12.0294				502004	477.997	7.7459	118.562	5.6208	51.4576	11.2203
		102011	721.34	10.6786	152.738	6.8607	156.701	36.1875				201108	2135.61	30.4034	578.743	29.005	192.065	38.3872				3020046	3903.29	70.2877	753.482	34.6077	187.832	8.6375				402026	1669.54	23.6082	290.975	13.2445	94.6808	16.2632				502005	672.111	11.1198	195.652	9.3396	71.3569	11.4713
		102012	1568.47	22.0796	242.842	11.1905	143.481	17.8526				201109	2002.04	28.3298	533.759	26.4873	165.167	32.6949			N22	3020047	598.101	9.5171	200.409	8.8226	24.9604	3.5715				402027	1598.79	22.8637	321.882	14.9928	83.7469	12.4201				502006	796.499	12.6077	171.392	8.1516	87.3646	15.7933
		102013	498.952	7.4228	68.8226	3.117	116.35	21.9385				201110	2968.37	41.1207	679.793	34.0156	164.024	30.1432				3020048	588.5	9.6454	237.141	10.6695	49.3135	6.5542				402028	1466.42	21.3719	353.352	16.6134	94.4901	13.618				502007	882.147	13.875	201.223	9.3805	96.8098	16.434
		102014	1796.41	25.397	295.822	13.6355	132.2	17.9483				201111	2829.06	39.3145	659.799	32.8833	155.658	29.4027				3020049	583.01	9.5893	189.982	8.8657	25.9613	3.4088				402029	830.078	13.1819	269.991	12.3095	78.2855	11.9859				502008	776.509	12.2937	193.963	9.1919	51.2199	8.6376
		102015	1597.98	22.3556	255.081	11.7546	144.548	20.4949				201112	3324.55	46.4579	805.809	40.7445	235.664	40.7745				3020050	885.594	14.2998	268.93	12.5959	27.4897	4.3534				402030	925.549	14.3546	266.966	12.6542	54.5243	7.8739				502009	858.932	12.9887	160.417	7.6597	61.0242	10.1623
		102016	1649.12	22.8248	235.652	10.6386	163.685	22.3839				201113	2371.59	33.2008	561.195	28.3508	160.226	28.0948				3020051	558.176	9.5808	182.806	8.1926	16.2334	1.6922				402031	442.317	7.7194	208.906	9.5331	59.9779	7.9946				502010	1059.91	15.9138	186.335	8.7956	75.5711	13.6701
		102017	1382.72	19.6409	223.176	10.1526	188.842	36.4754				201114	2965.41	41.6011	726.703	36.7488	182.269	24.8926				3020052	499.358	7.8488	142.27	6.4726	65.0923	13.4203			N13	402032	506.704	7.9066	151.387	6.8117	266.385	50.8818				502011	983.547	14.7844	196.467	9.336	52.3938	9.7229
		102018	918.193	13.7793	150.596	6.6759	116.268	24.9364				201115	3783.83	53.271	1001.46	50.7317	272.121	39.6263				3020053	631.381	9.8473	169.333	7.5286	130.392	21.6001				402033	1043.84	15.2292	319.622	14.7577	172.172	27.9403				502012	1087.61	16.0328	171.826	8.0496	61.3355	8.6634
		102019	1385.59	19.9588	254.143	11.252	87.0326	15.4291			V32	201116	3316.24	46.5932	1095.86	56.2163	281.152	37.4358				3020054	1703.89	24.0398	335.993	15.7316	147.73	24.0537				402034	1347.35	19.2507	338.143	15.5492	128.074	18.9232				502013	1096.85	16.5488	203.729	9.5529	69.4035	9.177
		102020	1573.47	22.4719	279.174	12.4638	95.6152	13.9366				201117	3153.14	44.0151	933.114	46.3119	241.976	39.0598				3020055	2906.28	41.2017	678.941	31.2253	173.512	23.1402				402035	1252.3	18.1912	414.306	19.3401	130.71	19.3938				502014	1078.68	16.6005	219.631	10.4165	75.8581	11.004
		102021	1357.29	19.1574	167.684	7.5124	148.765	28.7283				201118	2731.92	37.94	784.583	38.8845	278.065	52.45				3020056	1881.23	27.822	601.395	27.7034	138.198	20.2078				402036	1189.74	17.1868	425.423	19.6935	161.014	25.4491				502015	830.904	12.7024	155.697	7.3278	69.843	10.3065
		102022	1420.37	20.0816	191.365	8.6986	63.6068	8.5075				201119	2768.37	38.9036	883.744	43.6474	264.608	49.4106				3020057	429.01	7.243	57.7858	5.1341	60.0833	18.0337				402037	1320.71	19.1428	352.753	16.1309	140.406	23.1215				502016	986.227	14.2435	134.194	6.4658	74.8462	9.8348
		102023	2398.66	33.0447	355.845	16.5083	198.647	35.2421				201120	2957.76	41.6622	895.953	44.4302	280.865	43.7702				3020058	1658.32	23.6708	95.3256	8.5446	96.7244	15.7957				402038	1153.61	16.5227	301.207	14.1566	141.829	22.7224				502017	1169.28	16.9152	181.184	8.6972	70.6718	8.9136
		102024	2118.29	29.2472	337.503	15.6309	120.696	20.0942				201121	3220.51	45.2487	1031.49	52.135	232.253	30.4179				3020059	1335.06	19.8337	108.974	9.7567	71.0352	8.8238				402039	1187.11	17.0138	339.092	15.8342	120.861	18.9795				502018	1058.49	15.4519	158.978	7.6238	63.1093	8.9188
		102025	1934.46	26.8301	292.636	13.746	149.428	20.2548				201122	3001.87	41.6886	829.101	41.6467	262.896	39.2666				3020060	1786.58	26.4222	149.786	13.6074	118.65	11.8079				402040	1296.61	18.7756	369.057	17.4436	147.669	22.3151				502019	1121.12	16.5884	205.891	9.9892	76.8974	10.7579
		102026	1450.64	20.8569	303.348	13.9968	107.542	15.3893				201123	2647.96	37.3511	816.299	41.3451	232.729	31.4803				3020061	2059.8	29.9616	158.858	14.3151	121.871	10.9238				402041	1451.73	20.9042	393.096	18.2571	96.2157	14.0245				502020	1089.31	16.304	222.336	10.6182	91.5578	13.4446
		102027	1141.92	16.5449	210.4	9.6339	124.04	20.9895				201124	3433.35	48.5793	1105.68	55.6435	245.774	32.5945				3020062	947.719	9.0584	209.071	-15.613	184.752	43.152				402042	1379.77	20.4213	361.995	16.6761	111.322	13.9181				502021	1720.4	24.5435	269.286	12.8296	73.0079	10.2811
		102028	1516.21	22.4732	346.018	15.7528	94.3179	13.0746				201125	1992.54	27.8216	534.303	26.3031	246.656	53.1623			N23	3020063	1929.41	27.5019	488.246	22.5993	108.662	18.9989				402043	1758.54	24.9704	477.919	22.0449	139.343	21.3756				502022	1776.39	24.6983	183.933	8.4796	106.437	14.2399
		102029	1644.28	23.6958	288.399	12.9606	109.94	17.0519				201126	1726.71	24.1277	620.639	30.184	193.357	41.8612				3020064	1510.71	23.0142	488.046	22.457	187.903	28.3495			N21	402044	169.517	2.5983	59.1645	2.6737	19.9596	4.3231				502023	1852.76	26.0625	236.914	11.0623	91.4663	11.8881
		102030	691.539	10.5222	141.852	6.3877	104.76	16.9894				201127	1588.15	21.8334	462.159	22.7153	228.481	56.1262				3020065	236.817	3.7453	104.017	4.6377	129.359	31.9331				402045	827.67	12.3137	282.523	12.9277	202.504	45.1145				502024	1270.11	18.4187	215.557	10.2698	55.3348	8.9109
		102031	1369.22	20.924	333.625	15.4306	116.314	14.3666				201128	2165.95	30.3983	574.907	27.3853	291.818	64.983				3020066	69.892	1.1539	12.272	0.5591	56.8878	14.5991				402046	588.95	9.0031	209.335	9.4385	128.014	25.3175				502025	1529.32	21.7828	238.109	11.1776	51.3	7.1805
	V12	102032	1372.85	20.5361	450.216	20.5114	406.451	87.9615				201129	2401.9	33.7242	659.746	32.0036	169.031	32.6111				3020067	1696.05	26.2416	286.646	13.2941	226.22	40.0746				402047	331.856	5.2317	133.598	6.027	37.4928	6.7333				502026	1072.71	15.8422	258.65	11.9638	95.3156	16.0757
0.855	total dry weight	102033	1543.38	23.5145	493.844	22.5689	374.931	72.8152				201130	2609.12	36.4417	726.27	35.4866	153.605	25.8718				3020068	1205.21	19.2158	199.051	9.2287	226.895	42.1016				402048	994.28	14.5983	291.969	13.5827	149.776	22.2413				502027	1178.46	17.6535	308.268	14.1899	75.3702	14.0004
0.4825	part1	102034	1724.01	25.6755	555.66	25.2511	233.232	47.9794				201131	1834.68	25.586	439.427	21.406	151.892	31.4545				3020069	1924.73	28.657	262.861	12.1633	201.456	31.8564				402049	1054.32	15.929	409.709	18.8309	139.317	21.2595				502028	1879.51	27.2776	335.341	15.4048	85.1073	17.4712
0.3725	part2	102035	1602.11	23.4923	397.965	17.8457	315.819	60.9495				201132	1779.98	27.1111	715.409	33.8636	226.481	40.5429				3020070	1450.14	21.7441	174.534	7.9305	108.633	14.5727				402050	1246.43	17.7352	358.385	16.9107	131.815	20.4727				502029	2179.6	31.5215	434.018	20.4937	63.5776	10.087
		102036	1335.85	19.944	287.989	12.4358	314.861	62.528				201133	2459.4	34.598	695.485	33.5619	228.636	46.8635				3020071	2250.58	33.7919	317.192	14.7548	184.218	30.3719				402051	1435.7	20.9539	499.113	23.0954	114.574	18.2354				502030	1861.15	26.799	356.748	16.5005	61.3522	11.241
		102037	1534.42	22.0331	283.142	12.5982	369.338	75.7756				201134	2271.44	31.8609	675.836	33.4845	261.723	52.3413				3020072	3413.63	50.2642	791.221	37.0274	128.28	4.2936				402052	1242.8	18.1916	373.983	17.2962	153.798	25.1267				502031	1534.25	22.4238	358.279	16.8102	46.1306	6.6985
		102038	1007.9	15.5532	397.215	18.3608	138.159	22.5241			V33	201135	2785.21	38.7991	771.828	41.1776	360.314	73.112				3020073	2183.81	33.2003	300.914	13.414	137.486	23.4984				402053	1151.8	16.4568	269.431	12.3198	175.975	30.4268				502032	1687.36	24.5326	334.653	15.7633	55.3776	8.9049
		102039	2116.59	30.7342	548.982	25.0042	232.448	36.8415				201136	2976.85	41.7686	771.946	40.8109	314.011	62.4725		2007-08-07	N31	3030001	532.938	8.4739	139.87	6.3315	117.28	21.9304				402054	1701.06	23.9993	464.183	21.684	162.964	25.7812				502033	1286.4	19.0065	282.882	13.222	51.1279	9.9357
		102040	2663.11	38.5342	711.553	32.8164	224.767	36.2976				201137	2747.69	38.0022	654.684	34.3646	305.017	70.6773				3030002	1323.3	19.0936	215.091	9.6912	129.985	19.7198				402055	1294.07	18.6903	409.299	19.174	161.771	28.0528				502034	2165.23	30.8847	387.247	17.9761	44.7427	7.8887
		102041	2351.01	34.4125	692.227	31.2907	209.668	39.9168				201138	2457.15	34.1995	610.371	32.5461	307.857	65.38				3030003	1461.84	20.9835	296.882	13.6903	102.717	14.4515				402056	1372.88	19.6779	422.549	19.8102	126.541	19.2714				502035	1459.41	21.231	245.156	11.0452	70.6912	14.945
		102042	1271.95	18.5202	251.053	10.9681	333.217	68.1107				201139	2627.53	36.7636	660.653	35.4232	254.194	52.3396				3030004	1293.6	18.5612	236.685	10.8519	131.31	22.654				402057	328.313	5.3518	153.184	6.9614	24.011	3.4961				502036	1909.51	27.3135	298.616	13.764	66.3689	11.9434
	V13	102043	1722.05	24.6476	635.906	29.7201	124.092	18.2685				201140	2038.57	29.8017	592.402	31.2824	139.123	27.4917				3030005	1762.55	24.4735	278.34	12.4815	130.226	18.6257				402058	717.486	10.9688	261.046	12.1568	71.4899	13.9304				502037	1919.7	27.1345	306.895	14.3358	75.3873	13.2344
1.2513	total dry weight	102044	1636.59	24.0187	698.103	33.5019	39.4951	4.0656				201141	2719.65	38.27	584.559	29.991	181.635	38.7778				3030006	1610.82	22.5381	268.873	12.0135	150.541	25.4543				402059	739.885	11.7408	312.861	14.3112	97.2275	14.7217				502038	1809.99	26.1831	402.663	19.1122	70.853	11.4729
0.5822	part1	102045	1485.06	21.3526	579.056	27.3072	96.6936	13.786				201142	2198.95	31.185	578.146	29.7981	218.599	56.8343				3030007	2092	29.7735	322.261	14.715	95.5833	12.2165				402060	119.283	1.7172	23.0401	1.0392	10.9649	2.2449				502039	1860.89	26.6117	241.999	10.9937	114.478	17.8497
0.6691	part2	102046	1290.11	18.7522	425.32	19.4922	157.508	30.5592				201143	2394.57	34.1953	619.833	32.921	169.129	33.4848				3030008	1683.38	23.9153	322.061	14.8386	122.346	18.9753				402061	153.355	2.317	55.1063	2.4753	24.0663	5.5928				502040	1380.99	20.1653	212.204	9.642	99.59	17.5294
		102047	1220.72	18.4867	549.206	25.7944	141.814	26.5662				201144	2686.33	38.2076	661.772	34.6335	189.165	37.575				3030009	924.166	13.6949	195.807	8.6853	134.56	23.9151				402062	728.48	11.3404	284.511	13.1575	181.649	34.2989				502041	1946.14	28.0874	360.406	16.8118	86.4862	13.6616
		102048	1809.62	25.7595	494.11	22.3321	201.968	39.3446				201145	2421.18	34.1959	583.422	30.5628	231.281	55.2542				3030010	918.958	14.1138	310.195	14.4069	78.9714	12.6652				402063	163.119	2.5868	66.5346	3.0626	25.8792	4.1901				502042	1833.36	26.4075	330.84	15.3051	79.8815	10.2738
		102049	1851.16	26.1709	464.577	21.1123	166.352	31.9301				201146	2500.72	35.3957	592.539	30.729	295.188	58.7172				3030011	1223.76	17.8792	264.767	12.1914	147.486	27.734				402064	439.697	7.0102	227.337	10.7666	99.7264	15.5421				502043	2075.66	29.3835	394.68	18.4181	74.8964	10.5264
		102050	1967.11	28.1666	597.406	27.2971	203.566	37.8627				201147	2732.19	38.6877	685.509	36.0501	259.384	53.9996				3030012	922.986	13.554	175.624	7.7908	128.112	28.2767				402065	523.237	8.3245	248.548	11.7809	145.208	24.934				502044	1511.88	21.7073	288.336	13.6645	102.156	16.1838
		102051	1715.25	25.0462	659.134	30.9588	162.932	30.7368				201148	2774.32	40.0093	804.535	43.2584	256.125	36.8867				3030013	1007.78	14.3331	176.477	8.1997	133.354	20.313				402066	239.064	3.8284	110.923	5.0584	25.6705	4.1685				502045	914.115	13.2966	116.198	5.2721	136.913	24.3416
		102052	1750.13	25.0837	593.975	27.8283	114.02	15.5604				201149	2688.8	38.2734	679.309	35.7751	216.153	51.9314				3030014	1027.4	14.8656	195.325	8.8197	109.935	15.4549				402067	735.716	11.5418	322.232	14.8695	134.017	22.7397				502046	637.062	9.6023	98.217	4.403	133.853	24.8889
		102053	1031.25	14.4332	198.14	8.9244	87.6348	19.649				201150	3454.85	49.7241	1040.87	55.9471	229.633	30.017				3030015	1137.73	16.5624	221.064	10.2291	173.585	30.3484				402068	1719.62	25.2587	523.234	23.9475	188.963	27.222				502047	942.507	14.3494	242.573	11.1904	63.4004	12.3971
		102054	836.011	11.9075	193.351	8.8786	63.7103	12.9965				201151	2818.33	40.7189	758.702	40.3741	182.591	27.9594				3030016	2414.51	34.0024	496.078	22.8825	239.635	29.0903				402069	238.025	3.8975	120.076	5.4809	27.8768	4.3449				502048	2064.58	29.412	376.7	17.8268	81.5103	11.9622
		102055	795.398	11.0949	151.191	6.8978	53.3588	13.5955				201152	2874.45	40.7289	710.106	37.5555	258.094	46.0486				3030017	2497.4	55.3369	841.607	37.0777	167.754	22.0942				402070	1061.32	16.0599	399.536	18.6855	181.923	27.9666				502049	1820.41	27.0041	408.703	19.2544	22.2952	2.9952
		102056	1128.7	15.486	224.086	10.4741	75.6347	19.4516				201153	2547.76	35.9063	639.188	33.4041	232.951	41.9854				3030018	597.882	9.5496	166.063	7.9242	21.7293	3.1227				402071	1643.09	24.4534	631.859	29.4892	191.976	30.4329			w22	502050	952.641	14.7476	215.876	10.3862	127.779	20.4462
		102057	1150.17	15.8762	257.895	11.8927	83.6944	16.5746				201154	2959.9	41.9231	771.226	40.9239	186.891	37.2412				3030019	322.071	5.3565	119.737	5.453	42.2613	6.9353				402072	1761.98	25.6018	556.551	26.1236	168.286	25.3996				502051	533.3	8.8774	118.383	5.5374	86.9033	11.9257
		102058	1057.61	14.6949	234.178	10.6222	76.249	16.8189				201155	2772.05	39.1864	624.417	32.4322	220.1	38.5905				3030020	617.072	9.8024	240.739	11.0282	65.2431	11.6702				402073	1293.77	19.937	471.748	21.7254	143.689	21.041				502052	685.043	10.7336	180.912	8.7793	76.1103	13.1588
		102059	1114.01	15.4869	234.038	10.7461	48.5646	12.3554				201156	2989.95	42.328	771.983	40.6777	199.564	36.8009				3030021	599.338	9.1576	138.715	6.0814	165.024	28.4668				402074	1440.91	21.3253	418.86	19.4433	140.726	21.4287				502053	613.955	9.9307	130.828	6.2662	113.423	17.4085
	V21	102060	91.5694	1.5932	27.3048	1.2033	119.143	32.3919		2009-08-06	V11	202001	1236.14	17.3392	370.197	16.9952	68.0256	10.5049				3030022	1127.42	16.0126	266.528	11.9817	165.407	29.6956				402075	1183.15	18.888	625.33	28.975	204.885	33.1053				502054	870.535	13.5427	248.681	12.041	85.9613	13.6909
		102061	440.475	6.5083	131.231	6.6522	33.8976	6.7856		1.4516	total dry weight	202002	979.894	13.9856	275.04	12.9189	100.177	14.3731				3030023	29.0506	0.4508	4.8203	0.2281	33.4611	5.516				402076	1113.7	16.8537	391.808	18.0596	134.54	20.3838				502055	836.344	12.7005	192.83	9.0133	77.8357	13.8699
		102062	498.363	7.4048	167.367	7.7693	37.7856	7.2201		0.7102	part1	202003	440.33	6.8432	165.304	7.6518	17.4462	2.1771				3030024	747.039	11.2774	149.392	6.8753	213.493	48.5786				402077	368.378	6.0749	177.324	8.0086	42.3067	6.1779				502056	278.764	4.7519	108.531	5.2368	58.4296	11.4727
		102063	285.453	4.5604	110.51	5.4416	33.6206	5.0817		0.7414	part2	202004	1624.77	23.0746	433.669	19.5723	200.979	34.5056			N32	3030025	961.042	14.5217	165.396	7.4309	110.709	17.0541				402078	1625.43	23.4328	432.264	19.7586	64.827	9.5388				502057	1079.28	15.845	150.712	6.9041	47.5828	6.0689
		102064	456.294	6.9391	126.867	5.6514	25.977	3.6978				202005	2357.75	33.4097	686.694	31.8228	89.2411	12.0811				3030026	1353.27	19.6187	238.639	10.8791	176.147	28.4649				402079	1592.03	22.8719	383.721	17.6954	55.7434	7.2857				502058	1098	15.8924	213.876	10.5558	63.6715	12.2354
		102065	658.601	9.8266	168.281	7.7549	35.8336	5.4305				202006	548.602	8.0536	150.169	6.8542	97.5208	21.7542				3030027	1287.08	19.1385	241.909	11.2785	164.291	29.1955				402080	1433.98	20.6116	345.95	15.9378	35.2013	4.2808				502059	776.827	11.5552	137.415	6.5564	48.9831	7.2144
		102066	713.83	10.8388	179.371	8.2682	22.0675	2.6761				202007	703.077	10.3149	147.677	6.4873	90.0864	17.2043				3030028	896.532	13.5518	180.786	8.276	148.951	23.7028				402081	728.328	10.9264	186.926	8.3904	237.229	51.7482				502060	1046.42	15.7109	231.425	11.1955	79.8279	13.074
		102067	2633.96	36.5475	470.573	21.149	254.216	42.4154				202008	857.571	12.7903	270.443	12.4177	108.363	19.8978				3030029	1239.08	18.4519	244.584	11.069	133.172	22.9093				402082	1292.58	17.8507	243.831	11.3407	236.314	46.5892				502061	1019.08	15.0595	164.506	7.8527	46.3402	5.8867
		102068	1145.59	16.3241	216.499	10.1103	155.09	28.7645				202009	720.561	10.9466	221.372	10.3018	126.481	26.0626				3030030	1479.13	22.1844	360.725	16.7259	195.63	35.0886				402083	1449.7	20.1723	297.256	13.8808	201.566	36.9969				502062	886.468	12.2962	58.3751	2.6275	153.05	23.0154
		102069	2333.8	32.5864	462.647	21.062	227.884	37.6746				202010	324.016	5.1657	115.135	5.32	136.836	33.4022				3030031	1328.86	18.7758	310.582	14.3152	192.343	40.7405				402084	2102.44	28.8883	448.427	20.9054	123.241	20.1087				502063	1510.43	21.3248	170.831	7.6802	112.159	16.4188
		102070	2186.88	30.5196	390.806	18.1105	212.294	33.86				202011	444.963	6.742	140.76	6.3492	123.885	29.4391				3030032	1207.35	16.822	250.359	11.4767	188.479	35.8494				402085	1826.34	25.1912	356.206	16.5265	144.765	23.1716				502064	572.281	9.0449	113.492	5.3031	37.1579	4.4828
		102071	2360.08	32.73	486.611	22.5057	114.626	16.8327				202012	967.518	13.9402	223.797	10.3562	113.434	14.5234				3030033	1193.32	16.9029	215.112	10.0178	140.091	23.0169				402086	2030.25	28.6222	511.526	24.0284	90.5291	12.0551				502065	1994.05	28.7583	319.121	14.9633	107.389	13.8295
		102072	1468.82	20.7001	274.451	12.4536	155.733	26.2276				202013	307.781	4.6865	63.4253	2.8846	91.984	17.8473				3030034	1640.87	22.5886	264.085	12.2547	216.213	34.1582			N22	402087	2111.85	31.1623	412.606	19.0431	116.658	12.7485				502066	2151.42	30.8397	430.821	20.6742	103.836	13.2038
	V22	102073	3822.2	52.917	745.13	34.3864	112.88	14.8505				202014	1108.13	16.0347	272.623	12.6189	104.515	14.6012				3030035	1409.37	19.4934	216.18	9.7885	115.894	14.8743				402088	643.096	10.6524	215.017	9.7578	19.3035	1.8218				502067	1067.55	16.0987	271.809	13.6655	62.7179	8.6211
		102074	889.352	12.756	162.948	7.4064	123.353	26.741				202015	985.724	14.1144	235.076	10.8783	114.278	16.6729				3030036	1116.57	15.9058	239.553	10.9874	77.7637	9.694				402089	359.933	5.8705	90.0075	4.0615	166.065	36.732				502068	1518.62	21.1455	160.935	7.4969	164.736	24.5932
		102075	236.817	3.7453	104.017	4.6377	129.359	31.9331				202016	1017.27	14.4107	217.172	9.8455	129.406	18.2097				3030037	1301.76	18.5067	226.064	10.5581	99.5054	11.2454				402090	803.64	12.3021	180.25	8.2226	166.801	32.5375				502069	1943.94	27.6747	263.912	12.2953	113.797	16.1845
		102076	69.892	1.1539	12.272	0.5591	56.8878	14.5991				202017	852.937	12.4005	205.674	9.3957	149.295	29.6733				3030038	1135.88	16.4199	231.102	10.2935	118.734	17.2299				402091	1224.15	18.8924	278.541	12.8139	135.352	18.9329				502070	1478.74	21.3442	279.048	13.1407	85.6409	12.0208
		102077	598.101	9.5171	200.409	8.8226	24.9604	3.5715				202018	566.393	8.6997	138.785	6.1782	91.9198	20.2862				3030039	1327.45	19.7343	307.619	13.7111	64.5612	9.2335				402092	970.521	15.2152	230.643	10.4862	107.39	14.467				502071	1531.64	22.3176	314.764	14.7855	70.3386	10.1139
		102078	588.5	9.6454	237.141	10.6695	49.3135	6.5542				202019	854.712	12.6012	234.212	10.4131	68.8065	12.5518				3030040	767.359	10.944	159.648	7.2253	98.2815	16.0914				402093	1657.19	25.3936	409.564	18.7316	101.769	13.7266				502072	1558.67	22.3788	326.85	15.6286	89.5322	13.1552
		102079	583.01	9.5893	189.982	8.8657	25.9613	3.4088				202020	970.603	14.1879	257.28	11.5346	75.5918	11.3376				3030041	975.064	13.6101	149.363	6.8227	140.804	22.0659				402094	981.307	15.0045	253.501	11.6722	124.876	22.7748				502073	567.746	8.9525	140.632	6.7817	69.4972	9.3607
		102080	885.594	14.2998	268.93	12.5959	27.4897	4.3534				202021	837.254	12.0952	154.534	6.9523	117.611	23.3709				3030042	1310.35	18.6319	253.944	11.6315	131.603	20.2498				402095	762.661	11.9175	196.597	8.9504	154.145	27.8775				502074	1967.81	28.4417	438.583	21.1472	169.604	22.0871
		102081	558.176	9.5808	182.806	8.1926	16.2334	1.6922				202022	876.163	12.6787	176.358	8.0501	50.2865	6.921				3030043	1825.51	27.1403	406.478	18.5454	78.8304	10.2735				402096	965.388	14.7021	222.13	10.3249	180.052	37.3692				502075	1641.05	24.2488	277.902	12.7185	63.8372	12.8027
		102082	499.358	7.8488	142.27	6.4726	65.0923	13.4203				202023	1479.63	20.8631	327.938	15.2776	157.047	28.67				3030044	1990.65	28.2698	343.062	15.4373	152.643	21.7182				402097	811.407	13.5724	370.378	17.109	148.209	27.4441				502076	1277.7	18.9391	228.034	10.641	49.2806	7.4594
		102083	1929.41	27.5019	488.246	22.5993	108.662	18.9989				202024	1306.68	18.4655	311.034	14.4656	95.4203	16.347				3030045	1986.52	41.5195	574.811	15.4642	26.3527	9.5117				402098	781.122	12.1756	176.886	8.2205	224.772	37.6591				502077	1755.29	25.7979	358.98	16.8117	45.1379	6.3755
		102084	1510.71	23.0142	488.046	22.457	187.903	38.3495				202025	1193.28	16.9395	269.686	12.7212	118.135	16.4776			N33	3030046	699.231	10.7394	150.31	6.8597	176.95	35.4172				402099	1224.59	19.2829	305.978	13.9804	135.304	18.3818				502078	1656.42	24.2412	296.474	13.7166	68.7304	13.5628
		102085	631.381	9.8473	169.333	7.5286	130.392	21.6001				202026	894.839	13.1682	279.558	12.9533	85.0208	12.5194				3030047	1352.64	19.2233	221.552	10.1517	257.895	48.3144				402100	1260.59	19.5257	334.158	15.4086	161.229	23.7243				502079	1777.88	25.8959	302.048	14.1026	53.4602	9.4571
		102086	1703.89	24.0398	335.993	15.7316	147.73	24.0537				202027	704.403	10.4458	193.9	8.9157	98.0642	17.0753				3030048	824.692	12.3527	204.765	9.0594	152.751	28.0411				402101	1650.33	25.0702	359.929	16.5458	137.824	18.5205				502080	1599.32	23.5582	313.998	14.9516	51.1467	8.7517
	V23	102087	2906.28	41.2017	678.941	31.2253	173.512	23.1402				202028	935.282	14.1887	318.882	14.5784	74.5661	10.6364				3030049	570.837	9.0369	110.962	4.8082	140.904	25.3628				402102	1762.2	26.9525	386.426	17.7519	179.383	22.3526				502081	1691.66	24.4334	256.985	11.8306	42.6239	7.022
		102088	1881.23	27.822	601.395	27.7034	138.198	20.2078			V12	202029	952.319	14.051	271.932	12.5654	81.4457	9.6876				3030050	280.67	5.433	200.444	8.8134	115.166	20.024				402103	1941.89	29.3715	465.881	21.662	165.47	19.9026				502082	1113.4	16.8917	221.531	10.1489	67.2372	13.8806
		102089	1190.34	16.9488	243.142	11.1699	162.214	27.7061		1.4707	total dry weight	202030	1017.39	14.7604	272.951	12.3617	85.1983	14.9719				3030051	45.4194	0.6876	5.0058	0.2189	36.7858	10.8462				402104	1681.91	27.1106	532.27	24.3798	122.775	13.4461				502083	2214.96	32.081	375.899	17.4626	86.6257	15.8182
		102090	1346.29	19.9527	324.396	14.9476	103.865	13.206		0.7084	part1	202031	738.712	11.1422	255.997	11.5647	112.037	21.6124				3030052	803.3	13.685	302.283	13.5868	158.484	30.3562				402105	2022.28	31.8579	633.345	29.7088	125.854	13.2731				502084	1765.41	25.9071	364.799	17.3099	51.8507	7.8546
		102091	294.184	4.7998	72.9436	3.2827	75.9846	11.7147		0.7623	part2	202032	651.782	9.6397	161.295	7.3458	118.897	23.1268				3030053	390.55	6.6228	125.868	5.7416	114.141	22.329				402106	833.195	12.8194	177.603	7.881	241.096	58.1209				502085	1763.61	25.6285	297.574	14.0285	48.401	7.2884
		102092	532.938	8.4739	139.87	6.3315	117.28	21.9304				202033	715.407	10.6628	227.094	10.3653	94.3004	16.7813				3030054	930.62	15.9566	374.762	16.6654	131.724	19.5658				402107	1052.47	16.0681	201.525	8.9887	217.198	45.7263				502086	1695.59	25.5181	289.819	12.8087	142.239	25.4817
		102093	1323.3	19.0936	215.091	9.6912	129.985	19.7198				202034	860.496	12.3307	184.134	8.0935	241.232	48.182				3030055	676.197	10.739	165.844	7.4207	91.9092	11.6894				402108	1936.51	27.7929	294.094	13.4278	140.895	25.8473				502087	2093.87	30.7616	298.171	13.2371	166.588	28.941
		102094	1461.84	20.9835	296.882	13.6903	102.717	14.4515				202035	565.226	8.7043	258.317	11.7956	90.2378	14.322				3030056	930.719	14.4821	230.021	10.5901	115.762	15.6449				402109	1842.81	26.8153	390.169	18.2409	98.3743	15.0351				502088	2339.77	33.7838	316.379	14.2157	159.725	29.7248
		102095	1293.6	18.5612	236.685	10.8519	131.31	22.654				202036	1186.97	17.2003	357.014	16.0635	151.822	23.4257				3030057	688.908	10.6285	132.505	6.1211	125.263	16.6651				402110	1992.42	29.0218	404.69	18.6626	85.8616	12.4396				502089	2482.56	36.3982	409.155	18.4772	140.883	22.5974
		102096	1762.55	24.4735	278.34	12.4815	130.226	18.6257				202037	784.364	11.647	210.003	9.5791	140.041	20.2121				3030058	90.9626	1.4819	13.1589	0.5797	122.754	27.8477				402111	1948.2	28.7674	429.937	19.8472	82.0223	10.714				502090	2399.97	35.7721	538.483	24.8322	94.0993	16.2175
		102097	1610.82	22.5381	268.873	12.0135	150.541	25.4543				202038	750.839	11.6167	266.96	11.908	201.325	33.9941				3030059	477.335	7.5391	103.256	4.704	149.333	27.8024				402112	3371.65	50.1041	791.929	36.7135	259.93	42.4214				502091	2548.99	38.0459	549.621	25.4205	96.8293	16.7902
		102098	2092	29.7735	322.261	14.715	95.5833	12.2165				202039	82.4655	1.3174	30.1983	1.2974	13.9556	2.7396				3030060	1747.3	27.3838	256.066	11.5706	69.8904	20.4647				402113	2424.38	36.0953	566.511	26.3061	180.006	30.6694			w23	502092	1203.27	19.2128	175.952	8.3592	208.295	54.52
		102099	1683.38	23.9153	322.061	14.8386	122.346	18.9753				202040	603.463	9.2306	181.595	8.2336	147.032	27.1412				3030061	1793.87	27.6883	230.852	10.5719	89.9862	28.3802				402114	2414.27	36.6719	719.822	33.043	180.186	31.1975				502093	2980.18	46.4171	436.277	20.8149	144.122	21.4892
		102100	924.166	13.6949	195.807	8.6853	134.56	23.9151				202041	117.835	1.967	53.4112	2.41	17.9401	3.0901				3030062	3638.19	52.4389	352.103	16.804	44.0575	37.9887				402115	3051.84	45.0994	732.094	33.9206	188.533	30.4387				502094	2278.35	36.5649	369.844	17.5105	123.511	18.2496
		102101	918.958	14.1138	310.195	14.4069	78.9714	12.6652				202042	800.436	11.8301	204.835	9.3411	135.768	21.7696				3030063	2597.16	37.1865	217.274	10.4259	71.2343	32.6417				402116	3253.95	48.536	902.368	41.7143	139.752	20.3822				502095	1723.86	27.6199	274.465	13.124	167.955	35.732
		102102	1223.76	17.8792	264.767	12.1914	147.486	27.734				202043	837.627	12.4248	223.721	10.2381	129.065	19.2489				3030064	3151.58	45.9282	298.627	13.9982	81.0267	23.1031				402117	3366.63	49.8186	917.422	43.1976	186.967	25.5162				502096	970.8	16.1345	137.817	6.4936	44.4828	5.6454
		102103	922.986	13.554	175.624	7.7908	128.112	28.2767				202044	2151.14	29.2443	486.292	22.1575	113.016	17.3947				3030065	2561.52	40.9239	925.277	48.5828	739.094	27.6636				402118	2554.28	37.8369	694.542	32.4172	138.294	19.7033				502097	1098.93	16.8024	134.844	6.0262	155.633	24.1528
	V31	102104	2082.35	28.7225	425.123	22.0993	254.195	68.8329				202045	2133.64	28.9143	498.557	22.4948	105.711	19.1556				3030066	1747.3	27.3838	256.066	11.5706	69.8904	20.4647				402119	2117.97	32.27	707.599	32.9509	110.46	15.5268				502098	1781.49	27.0788	211.173	9.3675	124.632	19.4854
2.0405	total dry weight	102105	2371.01	32.7616	494.378	25.6934	255.69	51.1196				202046	1887.48	25.4207	437.58	20.0329	79.5127	13.8654		2007-08-17	N11	3030067	1134.87	16.3834	182.9	8.1974	29.8837	3.3447				402120	965.231	14.1791	158.603	7.3294	100.941	22.5148				502099	2343.58	34.4603	268.793	12.2349	101.879	17.0605
1.0276	part1	102106	2306.87	32.1137	535.878	28.0707	144.156	31.5793				202047	955.529	13.4538	218.503	10.1065	96.4894	15.2946				3030068	1147.4	16.241	216.706	9.8997	61.4046	8.8456				402121	1277.59	18.997	269.573	12.4327	133.13	24.55				502100	2232.76	33.3179	267.735	12.3482	89.4617	12.8621
1.0129	part2	102107	2390.67	33.6232	584.266	31.2717	35.4992	3.6827				202048	1629.82	23.0584	441.53	20.0602	113.329	14.7137				3030069	1343.38	19.2465	268.774	12.2736	67.6314	7.9683				402122	1027.55	15.1175	228.411	10.7898	139.123	23.1765				502101	2840.28	42.5179	299.788	13.9335	116.916	19.6767
		102108	2320.67	32.7002	564.336	29.9195	25.0293	2.6216				202049	1054.98	15.5705	391.1	17.7976	90.2633	12.8492				3030070	1210.01	16.9878	281.383	13.1693	38.7661	6.8006			N23	402123	994.118	14.9805	304.667	14.1103	111.077	17.6463				502102	2592.21	39.5102	293.562	13.9408	66.6797	8.4264
		102109	2476.94	35.0099	634.569	33.2291	15.4753	1.5846				202050	742.101	10.6857	139.878	6.2259	84.8994	12.5389				3030071	1482.85	20.75	245.492	10.9954	42.3285	5.0872				402124	1083.2	16.2573	357.719	16.3898	98.6878	19.3372				502103	2515.39	37.1479	255.819	12.1939	58.2577	7.5206
		102110	2261.93	32.0927	605.885	31.6922	23.9996	2.6225				202051	819.789	11.7433	193.069	8.7951	67.0891	9.189				3030072	1799.73	25.7154	338.48	15.2859	40.2616	4.9364				402125	1168.45	17.2226	302.444	13.8489	232.623	51.1571				502104	3039.87	44.5991	328.207	15.7167	105.66	17.4916
		102111	3222.93	45.3158	845.265	44.3188	95.1813	17.3871				202052	725.444	10.3877	153.921	6.9716	85.7642	14.4046				3030073	1216.12	17.5591	258.193	12.1253	66.7335	8.5723				402126	1482.6	21.9821	390.741	17.8438	160.001	31.3362				502105	2183.8	32.1703	290.092	13.7443	103.589	15.9229
		102112	3427.91	48.1835	945.147	50.4201	69.9137	8.1936				202053	686.277	10.006	172.184	7.8322	96.3299	17.6347				3030074	1390.99	20.0769	242.287	11.2966	55.6558	6.6728				402127	1230.13	18.486	369.615	17.0182	169.654	30.3292				502106	2923.71	42.9877	258.383	12.2195	86.2708	10.2984
		102113	3336.5	46.7658	805.13	42.1778	84.3145	12.7696				202054	517.605	7.5854	114.212	5.0051	83.6756	17.9798				3030075	854.317	11.9664	119.547	5.4894	173.328	27.6745				402128	1098.56	16.8122	354.549	16.5171	120.278	17.9932				502107	2007.96	29.8848	240.936	10.899	139.239	24.8306
		102114	3029.47	43.073	596.976	30.2225	280.243	51.8695			V13	202055	901.173	12.9931	243.442	11.8574	90.6866	14.1947				3030076	2195.53	30.034	296.236	13.288	283.811	42.2142				402129	1779.69	26.5235	499.272	22.867	151.943	27.3653				502108	3743.03	53.8728	721.271	34.0477	151.182	25.6495
		102115	2213.8	31.2221	378.731	19.1413	385.378	102.09		1.7013	total dry weight	202056	1081.78	15.7497	340.44	16.6971	87.0885	14.4166				3030077	3366.2	46.3187	903.289	43.6247	91.4947	11.2223				402130	1863.8	27.5454	499.472	22.9704	153.829	22.8093				502109	3438.5	49.3753	674.636	31.8247	137.782	23.1833
		102116	2414.4	34.7353	617.053	31.4568	150.42	30.9226		0.5922	part1	202057	980.744	14.1979	324.462	15.7048	95.7485	15.5611				3030078	3049	41.1775	431.432	19.9203	125.645	14.2299				402131	2346.99	34.6065	655.319	30.2349	122.685	15.4842				502110	2946.88	43.0238	557.706	26.2601	148.041	18.6746
		102117	2120.8	28.2364	423.678	22.1174	436.977	74.599		1.1091	part2	202058	683.914	10.4322	221.731	10.4348	52.8933	10.094				3030079	2607.35	35.127	357.57	16.8645	61.7895	7.0806				402132	1625.93	25.2547	627.312	28.4942	147.666	25.5716				502111	3478.56	50.6772	708.096	33.5897	104.858	15.2308
		102118	1661.76	22.6205	366.585	18.3739	478.79	83.4392				202059	935.243	13.7644	280.841	13.5473	50.469	7.5968				3030080	761.245	11.3554	157.711	7.2464	122.267	21.0799				402133	1406.12	20.8974	396.998	18.0992	111.964	18.6509				502112	3871.04	55.7115	807.386	38.502	157.944	25.2596
		102119	2188.16	30.3189	571.402	29.3021	399.303	53.0415				202060	799.935	11.7396	223.147	10.6294	34.8728	4.8862			N12	3030081	2804.9	38.7897	523.587	25.0004	74.6634	7.9925				402134	1692.5	25.0573	527.531	24.3473	83.1785	13.0447				502113	3346.55	48.5886	717.602	34.3043	106.783	15.3026
		102120	2405.37	32.8176	589.908	30.1361	384.653	56.1523				202061	632.318	9.5236	199.589	9.4772	54.6804	10.267				3030082	745.5	11.049	203.568	9.4582	52.9067	7.1831				402135	1451.35	21.501	421.506	19.3564	88.9505	13.4084				502114	4299.97	61.8877	868.213	40.8549	169.493	29.7755
		102121	2481.51	34.6278	518.984	27.2285	222.7	42.2171				202062	515.154	7.8987	160.779	7.6428	33.0915	6.321				3030083	690.127	10.1569	207.991	9.6055	69.1107	11.0794				402136	2164.61	31.5377	546.041	24.9985	102.164	17.2767				502115	3521.97	50.4796	696.716	33.0216	117.27	18.4351
		102122	2191.96	30.8339	491.366	25.3604	245.063	40.6757				202063	376.696	5.4901	99.6471	4.6635	29.5262	6.9066				3030084	726.985	10.5071	207.549	10.0374	65.6455	10.0143				402137	1798.45	26.5108	477.104	21.9099	90.0261	11.6521				502116	3876.01	55.0847	733.377	35.0769	138.107	19.6589
	V32	102123	2102.72	28.1464	523.552	27.2719	215.457	40.7604				202064	534.545	7.663	147.691	7.0814	41.8527	9.8815				3030085	1289.09	18.0923	256.752	11.8911	101.064	13.5249				402138	2181	31.7072	577.713	26.1029	86.2486	13.4597				502117	4247.33	60.4491	799.86	37.58	131.84	19.8777
1.9862	total dry weight	102124	1647.59	22.5484	453.001	22.656	236.073	45.5906				202065	754.002	11.2858	260.318	12.1022	79.7526	15.7749				3030086	1637.47	22.7754	328.067	15.3161	91.0065	12.4681				402139	2104.87	30.9718	696.857	31.7396	88.9176	13.1618				502118	3827.82	55.1699	758.734	35.5832	150.378	22.6208
0.7976	part1	102125	2169.5	30.2223	706.1	36.131	196.881	28.9815				202066	707.378	10.4718	237.833	11.244	68.8686	11.0271				3030087	1859.94	25.7514	396.252	8.6736	71.9849	9.4579				402140	1227.7	19.0587	586.229	27.5552	328.072	65.5453				502119	666.301	10.1723	87.4053	3.8234	254.962	52.8127
1.1886	part2	102126	2384.87	32.713	728.969	37.1594	189.658	30.6812				202067	659.373	10.0722	180.668	8.4079	41.5965	5.9229				3030088	1439.28	19.9533	261.956	11.9307	127.568	16.8109				402141	1569.5	23.7735	437.123	19.9037	415.87	92.4655				502120	1006.1	14.9162	129.564	5.8854	227.453	43.4107
		102127	2504.8	34.4412	762.205	38.3791	172.844	29.761				202068	1254.51	18.2394	481.771	23.2059	152.01	25.0356				3030089	1817.25	25.7437	344.93	15.9412	67.6403	7.4849				402142	1916.44	28.7557	616.194	28.8163	248.451	43.7575				502121	868.56	12.5841	82.7487	3.6991	261.324	54.4169
		102128	1368.42	18.0885	282.737	14.704	97.1876	21.7844				202069	1418.28	20.5205	456.716	21.8125	105.753	17.226				3030090	1673.51	23.1298	288.216	12.9495	109.963	16.7997				402143	3007.74	43.857	1121.03	53.3485	158.639	18.5067			w31	502122	316.674	4.9446	59.3973	2.5927	59.6814	12.173
		102129	1290.07	17.761	312.321	16.2537	55.4874	15.541				202070	1974.23	28.5233	635.236	31.1889	256.329	37.1796				3030091	636.594	9.83	171.487	7.9011	90.6684	12.2599				402144	2862.58	41.6161	900.648	42.8642	201.658	24.6328				502123	405.796	6.5986	110.659	4.8788	41.2135	8.4581
		102130	1257.74	16.9251	268.337	13.6835	104.404	16.8037				202071	1136.81	16.2081	204.209	9.7663	135.628	43.7509				3030092	1164.74	16.6347	220.956	10.1841	116.116	16.3277				402145	3666.99	55.4388	1412.9	67.4915	571.127	77.7749				502124	658.308	9.9018	142.122	6.4275	53.6291	9.8268
		102131	1139.21	15.6008	274.13	14.3624	63.8296	14.7092				202072	1286.82	18.3266	230.144	11.2871	141.817	45.2064				3030093	1735.02	24.4456	272.605	12.6246	142.609	17.8774				402146	3230.57	46.5406	750.27	34.9987	475.869	73.3355				502125	614.868	9.4688	158.692	7.3747	52.9814	10.0421
		102132	1180.24	15.7887	265.075	13.9312	82.4787	18.4283				202073	1310.01	19.0799	294.579	14.124	255.745	48.6949				3030094	2003.12	27.6256	390.552	18.0683	146.94	18.5016				402147	3089.09	46.5101	1025.69	48.2004	490.793	72.7065				502126	680.86	10.0149	106.299	4.6364	36.1018	6.1499
		102133	1309.02	17.8375	314.825	16.4016	42.2972	7.1865				202074	1487.74	22.0139	490.628	24.0654	245.286	40.228				3030095	2275.47	23.3429	33.5332	10.0459	-251.886	-34.093				402148	1188.13	16.6148	169.687	7.8353	417.873	93.4375				502127	488.908	7.8043	124.787	5.8318	65.1969	15.3397
		102134	1101.08	14.647	239.74	12.4506	77.4046	19.5665				202075	1748.33	25.8225	619.221	29.9106	216.875	34.0739			N13	3030096	500.869	9.4002	140.334	7.7422	79.9821	17.339				402149	1048.83	14.8386	158.554	7.2253	353.743	73.8218				502128	659.557	10.6149	197.771	8.9244	52.5628	12.4674
		102135	981.567	13.4177	221.471	11.4472	98.6651	21.8063			V21	202076	2430	34.395	527.138	24.329	184.979	31.7007				3030097	625.956	11.3502	171.914	9.4016	79.1113	16.6329				402150	1582.21	22.4571	293.435	13.5364	332.46	59.7051				502129	708.145	11.0534	214.425	10.1017	56.5546	12.1305
		102136	1231.13	16.1617	250.547	12.5891	111.621	23.6781				202077	2022.35	28.6855	411.435	18.8807	197.278	35.2125				3030098	916.159	15.8646	196.236	10.5255	65.0699	11.3266				402151	1633.87	23.9419	394.627	18.5102	273.12	43.0728				502130	778.078	11.6824	176.336	8.0383	80.262	17.4807
		102137	1121.17	15.0277	254.073	13.3249	101.648	20.5168				202078	2765.8	38.8185	520.468	23.9834	217.698	35.0587				3030099	1722.58	20.0628	300.88	15.4936	107.847	17.4434				402152	1676.95	25.0823	471.753	21.4099	165.431	32.4183				502131	104.788	1.7911	18.876	0.7964	13.9905	2.563
		102138	1279.58	16.6842	283.113	14.8099	86.5739	21.8538				202079	2255.15	32.4905	486.586	22.2091	169.466	26.4115				3030100	1522.67	15.2929	271.859	14.4899	98.9101	17.9754			N31	402153	991.069	16.0155	504.323	23.3679	197.223	28.9184				502132	1063	15.8622	201.352	9.1273	56.2408	9.4055
		102139	1208.36	16.7499	304.443	15.7815	85.7006	21.055				202080	1621.4	23.3222	359.971	16.5938	155.465	33.2877				3030101	1148.91	20.8714	291.846	13.8101	97.6731	17.6453				402154	844.677	14.1259	584.523	27.1742	190.276	28.0661				502133	905.42	13.5111	181.037	8.2359	43.765	7.3086
		102140	1450.82	20.3689	387.461	20.4598	7.7723	0.7676				202081	2132.92	30.4109	390.635	18.0857	126.776	20.1877				3030102	895.248	16.5689	212.208	11.5586	71.7302	11.6872				402155	993.274	15.8296	467.377	21.9969	136.192	19.2289				502134	955.493	12.9184	74.11	3.4397	92.5518	15.974
		102141	1197.34	16.7923	333.907	17.2918	15.8322	2.5193				202082	2899.23	41.6141	636.816	29.6124	171.277	21.7944				3030103	548.921	9.8663	189.643	7.8374	80.5988	17.6532				402156	814.712	13.2595	395.481	18.3189	102.382	14.2895				502135	1016.61	13.2826	82.1379	3.8874	95.9508	16.5029
		102142	1093.86	15.0523	277.056	14.7069	64.618	11.3507				202083	1643.36	23.5815	323.252	14.3195	106.03	24.4416				3030104	1432.56	24.3411	298.974	11.2465	73.9438	10.1935				402157	1025.56	15.7949	397.777	18.4615	239.437	47.1269				502136	1258.54	17.4305	150.553	6.9509	56.5113	8.9985
		102143	1136.52	15.4094	239.252	12.3612	139.063	24.735				202084	1947.95	28.3976	441.331	19.9843	134.804	27.2293				3030105	1209.67	20.9421	278.799	10.1603	84.3017	14.3082				402158	1224.55	19.011	480.992	22.4271	261.762	51.387				502137	1167.42	16.4156	160.969	7.3191	38.0156	6.0058
		102144	1314.04	17.8625	320.238	17.2078	22.6814	4.8237				202085	1696.9	24.4581	365.702	16.1599	155.44	35.9705				3030106	2695.12	23.3167	353.632	6.6894	230.446	13.3279				402159	1012.14	15.5644	377.455	17.814	258.296	44.4927				502138	1149.89	16.0274	136.172	6.2207	47.9966	7.9763
		102145	1242.36	17.0843	296.257	15.2922	36.7683	4.2749				202086	1987.88	28.8491	376.117	16.9412	123.302	24.5111				3030107	1444.1	20.0696	181.264	9.7846	51.6571	7.7221				402160	417.974	6.8349	192.151	9.0324	131.699	23.9811				502139	1355.62	18.4003	156.615	7.3054	46.7338	7.1287
		102146	1027.19	14.844	296.781	15.118	1.8637	0.1853				202087	2370.64	34.0767	489.048	22.0676	121.522	22.3436				3030108	1518.89	21.4225	206.178	10.6788	63.851	8.1499				402161	1436.87	22.5843	507.994	23.1293	433.034	87.7612				502140	1069.72	16.6979	254.407	11.3062	43.5919	7.3208
		102147	1118.38	15.2362	252.911	13.1903	60.9159	11.5879				202088	2257.51	32.347	414.524	18.4501	122.951	22.8854				3030109	1804.52	20.0716	222.184	11.7922	83.4133	10.273				402162	1514.06	23.7526	574.913	26.4042	429.122	81.75				502141	845.329	12.1955	121.768	5.4454	29.4855	4.8824
		102148	1152.27	16.0388	309.538	15.9513	10.3942	2.1186				202089	1988.21	28.692	410.895	18.6848	161.3	32.8666				3030110	1268.24	21.357	142.849	7.6729	47.3802	4.5833				402163	2066.61	33.1918	954.59	43.9096	418.11	61.9433				502142	886.529	12.8072	135.891	6.2262	31.3732	4.8656
		102149	1235.46	17.3433	342.726	18.0678	12.0307	1.3357				202090	1782.59	26.3076	418.146	18.9626	180.196	38.9214				3030111	1304.6	18.9022	261.201	14.013	72.0847	12.2859				402164	1716.28	28.1162	855.831	38.5455	324.305	50.2139				502143	1258.12	18.5777	231.015	10.4663	38.6955	6.2721
	V33	102150	1455.96	20.5261	291.9	14.9324	192.553	43.7759				202091	2118.1	31.0874	445.181	20.239	157.466	28.7119			N21	3030112	1668.01	23.4902	313.734	14.5547	135.365	24.2401				402165	1352.59	20.3409	368.592	16.9668	215.705	37.6433				502144	600.995	9.3343	159.507	7.202	17.5005	2.9828
		102151	837.057	12.3463	245.259	12.5445	40.6647	9.72				202092	1760.44	27.208	524.846	23.9674	228.325	40.5323				3030113	1244.29	17.5712	236.904	10.929	160.595	30.0687				402166	1438.68	21.6703	399.884	18.5254	149.473	18.5901				502145	849.41	12.7724	198.002	9.0925	37.0638	6.2095
		102152	1024.41	14.8447	288.858	14.937	44.8559	11.3162				202093	2047.45	29.7212	460.685	20.9289	182.001	33.2294				3030114	1604.83	23.182	279.755	12.9098	66.2848	8.2251				402167	886.423	13.7031	299.296	13.8855	121.22	19.7674				502146	817.667	12.5342	232.237	10.8833	63.0293	10.2507
		102153	1122.49	16.4071	322.858	16.8195	41.6902	8.0034				202094	2371.4	34.0404	477.119	21.5525	176.603	30.3429				3030115	1695.24	25.0338	406.707	18.7972	95.3193	15.4969				402168	1719.42	25.587	372.784	16.9468	232.671	45.798				502147	2134.05	30.614	539.459	25.7541	83.0244	18.4109
		102154	1336.83	19.3203	304.626	15.722	28.0142	5.0899				202095	2755.01	39.9671	602.342	27.6728	177.638	25.7806				3030116	2433.05	34.376	596.905	28.2525	132.032	21.9995				402169	1849.47	27.357	456.917	20.9523	214.893	32.9366				502148	2387.64	34.3218	646.887	30.8163	61.7989	14.0049
		102155	408.56	6.4907	161.292	8.8704	41.0212	10.3325				202096	2342.85	33.7661	475.69	22.1687	141.09	23.2009				3030117	2167.95	29.9369	357.782	16.7044	263.778	46.6338				402170	1719.94	25.1731	474.192	22.139	146.1	23.1616				502149	2910.97	41.7334	704.763	34.0076	135.483	18.1105
		102156	699.212	10.4913	225.519	12.3743	47.0063	12.506				202097	2071.64	29.7964	439.693	20.1146	151.704	26.2677				3030118	2283.18	32.3549	474.317	22.2913	120.815	19.2073				402171	2451.86	35.8993	567.681	26.3039	185.017	24.9584				502150	2340.51	33.7552	553.312	26.0295	189.951	30.8805
		102157	549.436	8.5049	205.297	11.3116	43.5113	10.6415				202098	1759.41	26.174	426.196	19.5731	145.602	27.1709				3030119	2641.14	37.0237	583.887	27.2631	227.294	39.6454				402172	2136.51	32.0587	640.896	29.8981	126.442	17.7011				502151	2160.29	30.6213	463.817	22.145	111.761	23.6542
		102158	932.803	13.5798	228.8	11.4082	38.7824	7.8028				202099	3219.16	45.9999	708.383	32.7164	315.493	47.0168				3030120	2400.62	34.2434	579.397	27.2785	173.649	27.1331				402173	2333.2	34.814	686.543	31.6847	127.388	16.458				502152	2302.23	33.066	557.908	26.5851	257.125	22.651
		102159	945.543	13.7901	224.732	11.0521	37.5903	6.171				202100	2639.19	38.098	623.689	29.3901	268.689	41.5865				3030121	2067.8	28.8888	379.068	17.6122	127.248	20.0359				402174	1041.74	16.4115	314.499	14.3428	427.51	101.309				502153	2503.7	35.8138	617.95	29.4357	113.966	17.3661
		102160	541.758	8.3805	158.754	8.2398	37.1753	8.2249				202101	2724.12	40.0898	644.384	29.9174	299.121	40.1419				3030122	1655.67	23.4792	271.506	12.9525	65.2966	6.4038				402175	1459.66	21.8744	364.589	16.8347	304.468	65.1565				502154	2407.1	34.3933	454.993	21.3258	109.201	16.3178
		102161	423.491	6.6076	151.838	8.4336	51.7867	14.8781				202102	2651.41	38.4292	469.981	21.004	508.658	102.216				3030123	1660.66	23.713	314.325	14.8899	80.2935	11.169				402176	1898.62	28.0923	481.519	22.1082	256.567	44.9451				502155	2662.28	38.3434	590.77	27.8135	91.8195	15.2893
		102162	954.039	14.5362	314.729	16.5187	38.3089	10.6807				202103	2752.91	39.4083	578.748	26.2483	345.124	68.6088				3030124	1385.88	19.3553	277.961	12.74	212.005	38.9791				402177	2353.72	35.1458	655.672	31.0149	270.093	44.6469				502156	1816.5	25.7045	361.005	16.7476	86.1903	16.0065
		102163	785.59	12.1799	269.055	14.2104	41.3292	9.5591			V22	202104	3053.57	42.9683	745.947	34.4237	443.765	81.521				3030125	1013.07	14.8501	326.362	15.616	94.9653	17.1118				402178	1339.61	20.0202	318.842	14.5778	372.974	75.1506			w32	502157	993.781	14.9156	269.576	12.5803	62.8382	9.2322
		102164	219.412	3.4097	57.1779	2.7221	125.774	41.0081				202105	2539.72	36.3807	647.432	29.3318	365.001	68.3691				3030126	1014.01	14.5477	216.487	9.7618	79.2593	13.285				402179	2071.89	29.9119	455.84	21.35	303.463	47.7092				502158	824.037	12.3113	201.886	9.379	46.2135	6.078
		102165	1013.72	14.4289	263.67	14.1924	41.8944	10.1801				202106	1749.21	25.2221	425.641	19.094	134.385	28.0157				3030127	2631.53	36.7077	548.087	25.5305	137.668	19.8928				402180	1261.15	18.6638	257.963	11.8677	310.975	55.637				502159	890.959	13.2491	218.233	10.1566	71.0203	10.4423
		102166	954.737	13.7852	264.246	14.284	32.8756	7.6968				202107	1731.08	24.329	379.534	17.1676	121.893	24.8335				3030128	1183.32	17.3659	253.997	11.5732	109.71	18.6108				402181	1810.94	27.0524	438.842	20.2402	336.389	65.0146				502160	1101.41	16.7485	302.789	13.9752	56.2345	7.8935
		102167	1079.79	15.5262	291.111	15.5148	43.5676	10.8124				202108	1956.94	27.8137	478.583	21.7474	127.84	25.6952				3030129	1123.09	15.9216	225.306	10.3316	92.1621	16.0543				402182	1944.44	28.2212	379.672	17.4931	302.302	50.8189				502161	1263.46	18.5191	298.17	13.8709	93.5225	14.3026
		102168	1251.01	17.5746	317.169	16.2986	44.1935	9.1798				202109	2430.96	34.2654	580.875	26.6645	158.155	28.329				3030130	2822.02	34.0648	497.727	22.8819	120.932	17.6898				402183	1955.29	28.6271	509.612	23.5581	203.755	31.097				502162	1628.24	23.2736	393.142	18.5486	131.254	19.2233
		102169	1528.22	21.7768	390.26	20.4008	48.3152	8.1402				202110	2401.75	33.6482	488.65	21.5802	165.834	31.6779				3030131	1816.02	25.5823	310.867	14.209	89.2144	14.3467				402184	2384.59	35.2988	606.46	27.9961	202.845	30.2486				502163	124.93	1.9718	31.7612	1.4722	63.3339	14.5515
		102170	1178.06	16.3776	262.199	13.5306	143.067	28.8279				202111	2373.2	33.197	463.184	20.4119	182.6	39.4373				3030132	1109.96	16.7558	224.387	10.2207	58.1663	7.3063				402185	2098.59	30.7021	460.447	21.1743	252.876	42.275				502164	204.845	3.1536	56.1763	2.5608	72.7003	15.1428
		102171	350.936	5.1437	76.6922	3.9566	126.16	35.1435				202112	2715.67	38.1836	575.269	25.8964	171.106	29.114				3030133	2332.62	33.3032	396.138	16.5067	91.1517	10.5857				402186	2475.18	36.5134	610.508	28.2366	195.547	30.8225				502165	1008.54	14.4622	204.735	9.2897	70.4187	10.1354
		102172	1124.69	15.6081	262.138	13.735	109.643	22.3308				202113	2345.27	33.2372	543.638	24.3855	183.871	36.0913				3030134	1907.37	36.7707	296.911	20.3476	205.363	33.6647				402187	2526.14	36.5884	509.006	23.5687	287.984	45.0887				502166	606.124	8.7	132.089	6.0411	76.6613	14.3028
		102173	2169.69	29.2993	422.065	21.2834	89.1176	16.3111				202114	1751.55	25.6633	451.768	20.2446	200.286	43.9334				3030135	103.987	1.8553	432.991	13.0037	216.131	31.7839				402188	2434.02	35.8322	641.468	30.2066	170.012	20.3907				502167	972.965	14.1331	186.898	8.2466	64.1981	10.5867
		102174	387.699	5.7516	107.178	5.3925	21.9332	4.4078				202115	1526.72	22.1104	353.628	16.008	83.4598	13.6983				3030136	237.648	4.3847	285.881	17.3376	226.739	49.4477				402189	1641.93	25.247	558.518	25.9712	148.649	18.4751				502168	1103.87	15.5654	203.328	9.1213	77.0909	13.0197
		102175	767.51	10.5256	194.965	10.0135	179.001	44.51				202116	2495.14	35.551	611.494	28.2892	126.922	14.4387				3030137	218.059	3.8472	418.61	18.1434	283.565	44.6572				402190	1353.42	20.5289	389.497	18.0645	105.22	13.581				502169	742.77	10.9483	198.57	9.1652	72.9082	12.0539
		102176	913.401	12.6939	197.516	9.9311	156.9	40.5041				202117	1420.68	20.6731	336.316	14.9907	195.347	43.1469			N22	3030138	2822.03	39.4403	617.519	29.1577	124.748	16.6433				402191	1148.48	17.7754	361.001	16.7819	97.8709	14.2606				502170	742.519	10.8048	167.089	7.6709	72.1764	12.5429
		102177	881.56	12.5953	204.506	9.1661	172.555	39.9054				202118	2222.41	32.2774	557.838	25.7144	129.003	17.1769				3030139	1866.53	26.321	412.97	19.7694	101.987	16.3958				402192	546.233	8.6544	155.68	7.1808	67.4269	9.7984				502171	629.344	9.1102	131.084	6.1126	81.1236	15.2297
		102178	2102.71	28.9099	533.047	27.6281	70.4362	12.1581				202119	2162.27	30.3959	374.72	16.3127	257.998	48.8427				3030140	1301.62	18.7256	211.112	9.8568	83.0144	10.8746				402193	1807.53	26.9986	491.405	22.8882	241.215	42.4807				502172	896.56	12.6795	155.069	7.198	73.9189	8.8555
		102179	1711.05	23.9004	417.332	22.1363	56.2924	9.5604				202120	2194.5	31.4109	465.64	20.7989	181.471	27.3417				3030141	2062.14	29.1488	359.995	16.8744	170.261	26.8482				402194	1577.16	24.245	480.168	21.9142	224.654	48.4456				502173	1031.46	14.4662	160.252	7.5117	42.8607	5.1306
		102180	347.519	5.0124	53.9031	2.7008	138.106	45.8039				202121	2534.87	35.8016	552.053	24.5727	201.972	34.5771				3030142	2569.06	36.8007	680.539	32.1832	164.659	22.2347				402195	1961.79	29.1387	633.545	29.8701	156.833	28.5513				502174	921.033	13.5478	202.001	9.3789	32.7372	3.6269
		102181	1868.97	26.1008	429.77	22.006	130.572	28.5316				202122	2090.71	29.6895	460.521	20.9888	155.251	23.2504				3030143	1477.81	21.5237	377.786	17.314	122.803	24.6995				402196	2389.64	34.5153	729.294	34.8821	218.498	38.6584				502175	468.163	7.1343	140.136	6.3669	86.5911	15.119
		102182	1326.75	18.2358	271.212	13.6689	83.481	17.1636				202123	2014.32	29.0924	475.579	21.6348	123.173	16.6712				3030144	2039.03	29.5004	440.956	15.4449	152.783	26.6168				402197	2344.01	34.4162	517.545	23.8026	242.016	36.4797				502176	1061.98	15.6156	285.841	13.4502	59.3741	6.6127
		102183	1457.33	20.1591	273.078	13.1098	35.7595	5.538				202124	2542.63	35.75	553.207	25.236	108.582	17.1055				3030145	1771.6	25.1229	401.538	18.6328	102.186	18.6262				402198	2019.3	30.3699	563.1	26.1061	221.959	38.9546				502177	2218.96	32.8944	659.673	30.7597	162.001	24.4029
		102184	1736.4	23.7535	339.546	17.5672	43.1629	8.4341				202125	2380.87	34.42	555.097	25.5396	104.107	11.9784				3030146	1876.65	27.6051	468.302	21.6053	151.905	24.2659				402199	2494.13	37.2845	667.513	30.882	203.12	31.8219				502178	3017.09	42.8039	669.07	31.6963	173.526	28.2983
		102185	1562.45	21.5712	278.477	14.0588	32.9644	5.3329				202126	2477.1	35.0982	534.404	23.9592	151.264	19.5222				3030147	1933.07	28.0062	497.144	23.1956	171.399	35.4979				402200	2123.93	31.6692	590.605	27.0961	183.033	30.5311				502179	4061.29	57.4125	910.659	42.6191	194.612	25.7234
		102186	1736.64	23.9172	350.434	18.2001	123.2	18.9435				202127	1976.63	29.2923	470.022	21.3265	83.2834	9.9833				3030148	1666.66	22.6324	354.696	16.8096	87.8134	17.5515			N32	402201	2103.19	32.9958	574.7	26.8488	104.729	14.2883				502180	3267.21	46.6461	597.522	27.547	207.595	38.2027
		102187	1208.41	17.0163	280.846	14.4981	145.022	33.2309				202128	1727.09	26.1235	449.658	20.4242	52.6064	6.4309				3030149	1433.75	20.2584	362.667	16.914	152.484	25.8627				402202	2615.11	38.9084	479.38	22.4691	79.331	10.921				502181	3679.33	52.7402	756.513	35.3807	119.453	25.7637
		102188	371.308	5.157	57.6609	3.0049	153.931	47.6772				202129	1771.13	27.0346	476.301	21.5828	75.8236	7.9163				3030150	2355.86	22.2732	137.725	-18.5679	382.412	18.9959				402203	3583.35	53.0929	661.912	31.1328	136.005	17.813				502182	2819.59	41.2499	647.92	30.6043	196.813	37.9032
		102189	823.668	11.4029	166.292	8.5018	152.662	40.6079			V23	202130	2008.34	30.371	532.001	25.5539	35.9168	5.096				3030151	1600.01	23.3345	278.087	17.7368	116.561	26.5825				402204	3361.74	51.8257	845.844	40.0821	215.716	24.8632				502183	2467.54	34.9927	449.818	20.7406	119.823	21.8401
		102190	922.979	12.5063	146.285	7.6971	150.151	33.7635		1.8562	total dry weight	202131	767.278	11.342	150.219	7.0581	230.234	51.4102				3030152	1387.16	15.8325	218.956	9.8963	105.306	21.9803				402205	2964.76	45.4248	614.262	28.9796	300.091	39.1507			w33	502184	2168.81	2.8694	1042.68	19.2336	127.739	31.5707
		102191	1934.68	26.5838	394.93	20.9159	168.234	40.9148		0.6713	part1	202132	354.536	5.4522	86.0501	3.9796	178.857	41.3692				3030153	1344.7	19.3055	292.591	13.426	105.306	21.9803				402206	2851.73	42.2159	363.647	16.9639	509.094	75.2236				502185	2593.29	3.4296	1123.13	20.8359	96.0399	21.8038
		102192	630.632	9.0348	250.154	13.8267	132.292	36.132		1.1849	part2	202133	1352.15	19.6319	323.649	15.3645	104.903	19.947				3030154	1216.37	18.6694	294.013	18.0438	135.927	22.5014				402207	1433.86	20.5904	112.205	5.0932	508.571	91.472				502186	2608.66	3.3485	1010.85	19.2647	151.23	30.6553
		102193	1726.08	24.0733	358.445	18.4809	76.0414	14.7145				202134	534.7	8.4173	144.602	6.6567	210.538	48.3563				3030155	1383.86	16.4571	186.097	12.9091	120.159	27.6568				402208	217.44	3.9024	105.585	4.854	27.0853	4.8905				502187	2653.38	3.4008	1009.5	19.0672	126.856	25.615
		102194	1664.32	23.7376	465.651	25.2192	56.6731	11.2594				202135	549.703	8.352	141.483	6.6248	201.68	46.9027				3030156	1450.79	21.445	368.738	16.9238	139.253	24.7671				402209	719.073	12.3858	272.668	12.0806	197.103	40.0439				502188	1711.75	2.2335	677.351	12.8271	138.52	32.0374
		102195	2356.63	32.0894	523.97	26.8934	94.4209	18.651				202136	1335.93	19.2226	219.267	10.0146	248.558	46.2672				3030157	1300.63	20.0143	224.115	19.6266	105.484	19.6196				402210	198.528	3.5503	111.166	4.9159	30.3718	6.2368				502189	1568.24	1.9858	589.337	11.3083	304.829	27.0062
		102196	2218.38	30.7471	458.553	23.0579	65.8294	11.5004				202137	1488.34	21.1368	235.319	11.1067	255.693	45.299				3030158	910.258	14.2136	272.232	12.4826	75.2979	15.6115				402211	885.542	15.3147	349.055	15.3538	166.726	29.8782				502190	1620.49	2.1886	751.597	14.0647	221.986	33.2945
		102197	1131.85	16.1104	276.161	13.6204	62.8514	13.9448				202138	1333.99	19.2682	285.86	13.694	168.992	29.4079				3030159	2159.32	31.8604	391.981	27.7954	102.792	15.839				402212	402.375	7.4374	275.113	12.612	73.9147	15.9095				502191	1633.97	2.1775	826.625	15.1831	110.241	24.6199
		102198	1588.39	22.388	371.007	18.9245	50.9323	10.7064				202139	1058.02	15.5696	329.69	15.6519	154.881	24.0576				3030160	1691.01	25.4661	510.141	23.6473	139.824	21.8231				402213	552.209	9.865	215.036	9.4464	30.5867	3.6514				502192	1584.09	2.1961	1023.85	19.0629	204.396	23.3123
		102199	1422.92	20.1329	308.574	15.8997	40.0025	6.7734				202140	1162.32	17.3498	392.935	18.5644	122.471	20.952				3030161	2509.05	36.6891	659.102	25.5787	125.638	21.604				402214	2466.96	38.8251	660.718	30.6521	184.39	21.7976				502193	1039.4	1.5721	972.053	18.12	171.299	26.5226
		102200	1005.26	14.1387	191.957	9.5262	94.9771	29.3645				202141	1853.77	26.8083	427.445	20.1538	138.293	26.1461			N23	3030162	2247.1	26.9796	332.886	17.9657	197.822	28.5724				402215	3047.27	47.2042	694.111	32.2121	213.661	29.7699				502194	2098.71	2.7749	1263.33	23.7805	171.299	26.5226
		102201	1074.05	14.9598	320.778	17.2691	84.0714	19.3062				202142	2149.75	30.9791	553.223	26.8115	103.309	15.0955				3030163	2075.2	34.748	269.761	14.4624	264.311	35.1936				402216	4099.2	63.417	954.304	43.9753	337.292	48.2122				502195	1949.16	2.5608	997.484	18.0046	192.774	28.7266
		102202	1668.85	23.1498	378.393	19.4892	62.3296	10.3238				202143	1835.65	26.3379	454.73	21.5873	99.6927	16.8224				3030164	2120.97	24.765	309.245	16.4368	226.482	54.2021				402217	3368.53	53.2892	987.165	45.3354	323.255	49.0893				502196	1104.28	33.7469	37.0204	15.1056	72.6459	13.3854
		102203	1482.97	21.1389	361.797	19.7546	52.6362	10.0671				202144	1513.24	22.0379	456.682	21.9925	74.9589	10.0245				3030165	1702.46	27.5187	218.891	11.9233	186.686	30.696				402218	3697.24	57.9019	898.416	41.6685	395.788	63.7069				502197	1213.14	40.2207	41.2531	17.9164	57.4442	11.6575
		102204	1402.77	20.2417	321.272	16.6839	66.5217	11.7909				202145	1664.25	24.1105	426.567	20.6228	89.9845	13.3264				3030166	1570.96	25.2109	225.457	11.9615	166.587	26.7254				402219	3272.81	50.8499	686.063	31.8577	302.819	50.4194				502198	1934.83	43.753	63.7428	19.4503	64.8655	14.5474
		102205	2223.9	30.9603	530.873	27.6122	73.9385	10.7134				202146	1268.78	18.6794	360.577	17.298	83.079	14.8691				3030167	2937.95	44.7888	349.929	18.9704	268.042	27.8058				402220	2236.14	33.3672	298.431	13.7828	334.662	53.6317				502199	2243.75	56.6277	73.66	25.8756	48.4564	8.399
		102206	1751.36	24.1938	352.572	18.0051	106.031	17.5878				202147	2135.58	30.3533	493.606	23.5177	72.7035	11.8057				3030168	1753.13	21.8122	224.968	12.2591	202.067	30.5755				402221	2635.42	39.3766	340.267	15.7922	427.831	73.4676				502200	1915.92	46.546	62.6245	20.8337	46.7602	9.3598
		102207	2147.82	30.3959	601.914	32.8457	66.8446	11.3493				202148	1439.42	20.8657	312.489	14.4502	114.868	22.3656				3030169	1467.7	23.7391	169.593	8.9924	198.464	33.4166				402222	667.264	10.7752	152.707	6.9207	126.895	27.0541				502201	1579.4	46.7458	52.4003	21.2248	35.159	5.5775
		102208	1513.07	21.4535	328.573	16.9047	75.3949	14.6049			V31	202149	2448.8	34.8142	633.277	33.4042	60.5241	11.3665				3030170	1382.42	24.6362	227.961	12.077	149.817	33.575				402223	486.764	7.9742	103.691	4.6426	153.396	34.2472				502202	1737.02	43.6633	57.3283	19.9029	42.2067	7.4147
		102209	1817.64	25.6196	419.9	21.5279	80.9241	16.397		4.5651	total dry weight	202150	1749.15	25.5111	468.665	24.3863	31.3275	7.8852				3030171	1462.47	22.6314	160.8	30.113	238.306	29.2017				402224	346.703	6.0264	95.4229	4.188	89.5944	20.0064				502203	1324.25	36.9085	44.4147	16.6942	38.9677	8.273
		102210	2282.87	31.7334	538.011	28.3706	133.59	21.643		1.3947	part1	202151	771.593	11.151	159.685	8.192	217.888	65.5336				3030172	1606.43	27.0392	213.102	11.3296	254.148	36.9324				402225	594.458	9.7891	155.904	7.0579	160.901	37.7606				502204	2228.96	50.5253	72.172	22.6968	34.1011	6.5685
		102211	1684.91	25.3573	739.293	39.5367	152.826	23.0824		3.1704	part2	202152	1740.22	24.7995	345.398	17.4079	253.317	67.1484				3030173	1469.13	26.0697	255.612	13.5712	201.451	29.9198				402226	752.538	12.1866	141.561	6.389	169.275	40.8311				502205	1502.36	31.9863	49.6131	13.9458	53.8781	12.444
		102212	6021.75	84.8409	2122.04	113.467	447.247	66.7866				202153	2185.88	30.9564	456.578	23.0889	189.912	48.6217				3030174	1019.87	18.1396	162.62	8.5566	143.546	23.8437				402227	876.494	13.8589	198.683	9.2489	134.828	24.5163				502206	1965.71	38.9614	63.8266	17.3786	50.5838	9.9447
		102213	4797.43	65.2605	1150.8	60.6547	124.637	17.9001				202154	1844.85	25.7394	348.611	17.9373	224.647	58.639				3030175	2392.14	30.207	359.16	19.4488	155.353	23.32				402228	595.588	9.9577	121.054	5.5915	55.4708	8.6003				502207	1976.19	40.0416	63.4083	18.1005	57.4573	11.0196
		102214	6462.55	88.6338	1727.08	92.0342	309.916	47.3703				202155	1968.74	28.0958	460.443	23.5967	185.803	44.7094				3030176	1895.53	32.8164	495.622	16.297	181.774	21.1584				402229	823.928	13.1448	196.915	9.184	37.0885	5.5524				502208	1863.26	52.5366	61.1852	24.1313	54.0014	9.5529
		102215	4893.12	66.2282	1107.38	57.9425	120.192	16.7358				202156	2225.32	31.6986	493.928	25.5505	136.058	29.6125				3030177	2799.91	37.1745	468.239	25.0933	155.565	24.5987				402230	1014.26	15.674	159.572	7.3255	164.266	23.2117				502209	1915.65	31.5743	62.1866	13.8808	87.2505	14.8625
2007-08-10	V11	103001	1414.02	20.5279	258.295	11.7137	112.511	19.7465				202157	3069.16	43.364	701.219	35.7022	140.252	31.6129				3030178	2791.6	42.4058	1162.51	36.0607	224.474	45.331				402231	1214.15	18.726	190.289	8.5416	164.368	23.6518				502210	1421.63	27.687	47.1227	12.1742	75.9036	14.5959
1.2951	total dry weight	103002	1336.78	19.426	220.981	10.2056	128.762	21.5013				202158	2188.83	30.914	469.759	24.7781	102.539	22.2052				3030179	3619.31	43.1145	1103.67	44.2971	256.83	61.2582				402232	1176.91	17.7659	193.72	9.0013	102.967	15.6213				502211	2003.41	47.0233	65.6353	21.2268	65.9164	11.3753
0.4825	part1	103003	1363.8	19.6784	284.711	13.515	96.2687	19.2197				202159	2672.26	37.5956	640.184	33.2459	126.589	26.3102				3030180	3238.71	37.1095	1304.98	44.545	200.275	61.3174				402233	1105.02	17.1193	197.173	9.0124	152.883	29.4367				502212	1887.32	43.1657	61.7096	19.3245	60.8826	8.5545
0.8126	part2	103004	695.031	10.5534	135.621	6.1652	73.6596	14.6057				202160	2340.61	32.4575	494.696	25.43	214.843	56.1704			N31	3030181	673.92	10.1603	111.437	5.1478	98.2545	15.1908				402234	1556.94	23.8985	246.839	11.5142	192.955	35.0145				502213	2136.75	51.4951	68.6639	23.2549	57.0831	8.7648
		103005	2126.2	30.1188	363.456	17.1589	94.1442	15.3452				202161	2977.93	41.3488	592.996	30.2117	186.714	44.4903				3030182	558.762	8.8561	117.259	5.2719	71.7789	11.9922				402235	1019.07	15.791	214.424	9.9189	99.4615	14.9085				502214	1556.38	37.6201	50.7259	17.253	77.8594	13.4755
		103006	1698.29	23.9795	297.133	14.0194	105.96	18.5563				202162	2583.09	35.8676	529.171	27.5053	114.712	21.1298				3030183	734.947	11.528	144.16	6.6292	93.0247	14.1544				402236	1265.37	19.4349	256.987	11.6312	68.2123	9.2853				502215	941.017	15.1607	31.0718	6.6566	104.35	20.2681
		103007	2056.55	29.139	362.196	17.0819	115.113	16.5707				202163	2720.35	38.3051	696.138	37.2779	102.094	17.0017				3030184	713.946	11.2084	144.879	6.5303	124.797	23.3513				402237	1437.3	21.4836	246.761	11.2684	100.998	16.5487				502216	655.81	12.8147	22.4389	5.5592	102.018	20.7237
		103008	1808.6	26.3126	485.151	22.9657	64.7111	9.1337				202164	2444.65	35.17	627.667	33.3804	92.0749	14.9747				3030185	1186.96	17.2079	195.637	9.1003	138.807	25.1604				402238	1581.96	23.738	281.571	12.7951	98.885	15.0696		2007-08-17	W21	503001	1027.65	15.9425	164.266	7.4002	79.385	14.2961
		103009	2626.23	37.2734	608.153	29.6254	87.7168	10.3066				202165	2795.03	40.6111	760.733	40.7422	93.2225	12.9201				3030186	570.587	9.0434	134.064	6.336	69.9346	10.7948				402239	1072.24	16.6768	195.518	9.0342	89.8813	12.4497				503002	1140.89	17.462	185.499	8.6146	63.6722	9.2884
		103010	3084.32	42.971	728.243	35.9006	131.536	16.8709				202166	2589.97	37.6576	807.541	43.024	140.67	22.1765				3030187	954.982	14.7294	202.552	9.4024	107.096	16.8457				402240	1242.26	19.0427	225.487	10.3122	82.3231	12.2067				503003	353.748	5.5653	33.1228	1.4508	80.9873	17.0264
		103011	1729.22	24.7538	363.245	17.4102	87.9238	11.4286				202167	2278.52	33.1502	711.572	38.1141	170.968	37.3648				3030188	1317.87	19.1718	157.472	9.6363	123.862	19.1685				402241	1262.87	19.3036	204.9	9.2812	88.3041	10.4138				503004	477.358	7.5432	71.5148	3.2074	73.7665	16.3649
		103012	2483.49	35.7592	551.979	24.331	222.744	36.2505				202168	2989.99	42.4781	668.764	35.249	96.385	17.3054				3030189	1076.86	15.8969	177.442	8.4346	97.1194	11.8686				402242	1587.88	23.5133	263.642	11.9535	87.6097	12.9344				503005	719.9	11.3367	106.472	4.5549	91.8231	18.8363
		103013	1417.93	20.9313	244.357	10.1757	300.449	57.4415				202169	2949.16	41.3547	691.582	36.5448	166.347	33.2348				3030190	1023.35	15.1306	181.543	8.2631	109.281	14.1409				402243	1007.62	15.2549	184.121	8.558	78.5194	11.1155				503006	1250.06	18.452	178.438	8.2915	72.9507	13.958
		103014	1628.71	23.1238	240.245	10.3086	352.433	69.6115			V32	202170	2211.81	29.6297	775.252	40.9188	211.041	44.3338				3030191	1149.46	16.5114	182.365	8.5944	130.844	19.2984				402244	939.143	14.8194	187.121	8.575	63.5668	8.1715				503007	290.404	4.7386	39.726	1.753	56.0331	10.8556
		103015	1069.83	16.3232	337.035	15.0239	131.835	20.6918		4.0613	total dry weight	202171	2347.13	31.7882	811.951	42.3425	159.671	29.4162				3030192	498.21	7.8653	104.754	4.7971	121.421	20.0201				402245	1385.64	21.0948	228.369	10.5186	104.041	13.4549				503008	1288.58	19.3258	188.225	8.4426	83.2769	16.2139
		103016	3203.16	46.2353	756.867	33.7076	337.025	64.1158		1.3124	part1	202172	1628.53	22.2486	696.779	36.3641	259.554	61.9003				3030193	651.143	10.2872	154.761	6.9997	130.433	22.0632				402246	1589.97	23.8948	257.514	11.88	101.067	12.2405				503009	1349.1	20.1672	193.981	8.6769	108.388	22.7998
		103017	3365.96	47.9706	751.519	33.9578	352.138	61.5536		2.7489	part2	202173	2429.82	32.9709	798.905	42.0511	99.1089	18.8974				3030194	747	11.029	118.961	5.3847	121.736	20.6278				402247	1526.37	23.324	311.985	14.5598	97.4369	13.8117				503010	1194.08	18.2019	198.115	9.0857	94.2066	18.6347
	V12	103018	1074.94	15.3869	157.437	7.0994	171.465	38.3616				202174	2096.75	29.1391	821.704	42.8194	102.795	14.717				3030195	653.803	9.9522	129.04	5.9762	91.3175	13.3992				402248	1521.3	22.9319	298.044	14.0822	109.438	17.6571				503011	1246.21	18.6994	214.208	9.9028	53.7955	9.8102
1.3225	total dry weight	103019	662.168	9.8332	124.365	5.4433	134.91	27.8521				202175	1925.57	28.0992	814.494	41.8211	57.1751	7.7002				3030196	464.195	7.5606	119.511	5.4124	132.089	21.8049				402249	1267.69	19.8063	239.833	10.9509	98.9666	13.6319				503012	1142.31	17.6815	240.707	11.4177	45.8453	9.2944
0.7084	part1	103020	1003.41	14.8405	210.485	9.345	169.901	35.5629				202176	2003.56	27.2415	575.392	29.1575	63.4644	12.5338				3030197	655.269	10.415	147.922	6.5493	189.307	30.4046				402250	1476.31	22.2275	278.151	13.2311	92.4476	16.5788				503013	1785.94	27.0001	276.385	12.8544	62.18	11.0937
0.6141	part2	103021	1159.65	16.3045	152.102	6.8514	124.367	19.7482				202177	1521.08	20.8632	505.405	25.9248	72.6917	14.4788				3030198	331.202	4.9335	100.548	3.0875	35.0539	4.5319				402251	1371.86	21.1893	277.219	12.6802	84.2272	11.0054				503014	2031.64	29.6246	292.818	13.846	74.0668	12.1139
		103022	897.726	12.9646	115.286	5.1423	88.3329	14.1256				202178	2122.13	29.6048	657.913	33.7293	57.415	10.3161				3030199	982.347	14.3025	387.689	11.8586	189.293	29.7014				402252	1553.14	23.5797	317.265	14.8047	92.1521	12.9577				503015	1815.56	26.3472	249.114	11.4916	70.7317	14.2999
		103023	645.771	9.6949	97.6369	4.4143	134.423	27.5346				202179	1832.5	25.5772	712.048	37.3959	64.7358	8.8938				3030200	1294.69	18.8184	351.168	13.7452	168.959	21.136				402253	1589.2	24.2844	310.705	14.165	142.371	22.6741				503016	2290.03	32.6416	296.184	13.8285	67.8227	12.6331
		103024	1089.42	16.0674	198.622	9.1333	81.9901	12.5617				202180	1795.7	25.3149	656.495	33.4282	54.6721	8.2337				3030201	987.573	14.4475	329.183	11.9099	239.314	30.9322				402254	1010.17	16.3652	242.673	11.2758	81.9422	10.3068				503017	1507.29	21.8379	206.715	9.6399	55.5168	9.9193
		103025	1228.32	17.283	180.243	8.0738	104.976	18.4693				202181	1131.99	15.2694	413.87	21.6102	97.6729	25.4703				3030202	1280.38	48.887	326.895	13.6472	222.279	32.7762				402255	919.139	14.6548	209.527	9.555	76.9772	12.3712				503018	1666.78	24.2063	249.91	11.5877	85.1487	15.133
		103026	2409.09	34.1353	591.885	27.9883	120.945	15.0442				202182	931.422	12.8877	420.216	21.6772	113.931	26.7056				3030203	1433.29	24.2911	422.859	17.5551	208.287	33.3973				402256	1045.53	16.6164	212.297	9.9077	88.3448	12.2247				503019	994.422	15.3094	149.459	6.9262	61.8274	11.1578
		103027	3058.71	42.8385	723.822	34.7811	128.131	16.2688				202183	1293.01	17.8361	508.121	26.1331	108.151	35.4305				3030204	1477.59	21.6546	390.559	21.4506	118.312	21.5344				402257	1290.5	20.0132	290.946	13.7133	69.8768	11.5786				503020	1660.3	23.786	220.858	10.1348	60.1259	8.7986
		103028	2394.23	34.0916	581.55	28.1108	88.9241	10.22				202184	1304.69	17.6295	449.941	23.2465	133.136	31.3922				3030205	2167.32	29.8944	409.627	16.6689	170.043	24.9115				402258	399.298	6.6144	104.942	4.7431	46.8237	7.1162				503021	4233.45	58.9131	649.986	31.1499	151.432	19.7326
		103029	2062.98	29.1173	466.525	22.0579	93.3676	11.8897				202185	1039.71	14.0821	349.816	18.4888	86.5272	26.3275				3030206	1795.59	25.5749	415.637	17.8639	33.2802	3.3078				402259	716.987	11.6332	166.699	7.4483	167.513	35.4423				503022	4763.63	67.0502	752.422	35.9432	192.252	26.2028
		103030	2466.68	35.2601	696.051	33.8749	98.9853	10.3539				202186	1439.13	19.3511	440.396	22.3001	82.3113	18.2466				3030207	1794.79	25.4808	319.468	17.8023	87.7269	12.2634				402260	685.574	11.032	161.097	7.3818	174.573	35.7602				503023	3184.98	47.3188	589.684	27.176	195.614	31.7638
		103031	2437.33	34.9313	531.424	22.6664	181.048	29.5336				202187	1945.47	35.0313	651.55	30.689	107.656	17.3968				3030208	2163.17	30.4825	400.017	21.2994	72.3308	8.5427				402261	1009.69	15.9353	194.398	8.7641	212.36	35.3085				503024	1350.53	20.8497	312.899	14.4614	112.532	16.3575
		103032	2332.47	33.8248	556.485	23.4696	197.252	35.9001				202188	2671.74	34.3968	628.8	29.217	142.621	30.7182				3030209	2225.23	30.6959	358.437	19.2928	91.9481	12.5209				402262	1237.21	19.2519	259.089	12.1369	123.271	20.809				503025	487.695	7.875	124.218	5.6297	97.0154	17.0623
		103033	1261.92	18.2039	201.823	8.2266	313.484	61.257				202189	1962.63	34.9153	655.652	31.0042	83.1506	16.5761				3030210	2611.33	36.8831	462.609	23.4396	9.4603	0.8454				402263	1182.05	18.4635	279.114	13.0942	132.257	20.1095				503026	1843.34	27.5718	423.761	20.3368	90.9227	11.939
		103034	1720.73	24.2981	251.399	10.5116	329.685	58.5166				202190	2577.9	33.4922	599.686	27.5576	188.081	47.1373				3030211	1696.23	23.9877	335.947	13.8289	214.946	45.7865				402264	1185.28	18.4713	249.15	11.9875	93.9643	13.6794				503027	1426.74	21.3113	347.073	16.5735	88.646	12.2708
		103035	1159.65	16.3045	152.102	6.8514	124.367	19.7482				202191	1404.46	19.1801	402.577	20.8482	99.9246	19.548				3030212	1149.66	16.4175	232.177	9.4786	312.709	57.8848				402265	976.398	15.3182	234.167	11.0835	148.009	29.9886				503028	2048.68	31.4697	508.957	23.781	142.526	24.0503
		103036	1228.32	17.283	180.243	8.0738	104.976	18.4693				202192	2363.03	31.3866	812.039	39.1749	213.422	41.067				3030213	1856.61	26.3204	346.341	14.2051	323.702	72.1162				402266	1418.8	21.8564	301.452	14.0693	120.383	16.8592				503029	2289.52	34.4122	557.83	26.5648	69.9447	7.9605
		103037	2492.1	35.1695	559.855	26.4235	90.4923	10.6444				202193	2829.85	37.4273	1011.79	48.738	205.013	33.9689				3030214	1791.35	25.402	347.19	14.2204	277.407	60.9539				402267	1819.01	28.9	464.105	21.3423	110.856	15.688				503030	3334.15	49.9894	787.157	37.1574	143.923	18.226
		103038	2466.68	35.2601	696.051	33.8749	98.9853	10.3539				202194	2031.27	27.0632	739.466	35.3151	189.504	35.1772				3030215	2068.35	28.5191	353.629	14.5871	234.674	45.4293				402268	1513.57	24.1734	379.798	17.6233	96.4605	14.2414				503031	2371.18	35.7052	515.484	24.0384	145.534	23.473
		103039	2066.7	29.5936	482.598	20.911	105.276	16.7928				202195	2411.68	31.9168	839.462	40.17	257.868	48.4225				3030216	2615.81	35.4825	455.485	19.2474	182.545	31.5432				402269	1514.71	23.7455	335.426	15.8098	87.0659	13.4502				503032	1129.96	16.9564	214.156	10.096	84.2313	14.6709
		103040	2211.61	31.2215	481.676	21.1129	121.627	20.8653			V33	202196	2488.12	30.5661	662.983	34.1435	181.663	37.9373				3030217	2657.02	36.1947	480.41	20.9609	177.778	22.5225				402270	1679.41	25.4901	383.627	17.5089	75.2028	13.941				503033	1303.81	19.1413	227.849	10.8773	90.8078	14.692
		103041	2591.29	36.8642	594.961	26.1663	109.953	14.5957		4.3367	total dry weight	202197	2506.59	30.8472	585.764	29.3949	229.836	51.2181				3030218	2203.83	30.0547	339.842	16.0916	135.809	23.8358				402271	273.573	4.7353	87.4811	4.0162	27.0918	6.3269				503034	2087.9	30.7259	402.636	18.8562	83.8668	11.7362
		103042	2360.42	33.1535	443.305	18.994	198.004	37.8454		1.6121	part1	202198	3084.35	37.3843	744.511	38.5994	239.108	47.6362				3030219	1795.14	25.047	379.753	18.3427	57.8059	11.8264				402272	1122.58	18.081	223.08	9.9468	244.499	58.6829				503035	2116.2	30.9095	400.464	18.9683	60.5482	9.967
		103043	1826.4	25.8314	304.478	13.0165	304.264	56.2478		2.7246	part2	202199	3140.74	38.1087	743.409	38.6884	199.554	41.2079				3030220	2455.91	33.1392	429.486	20.7374	91.7337	13.8632				402273	491.692	8.3931	141.724	6.5579	35.3627	7.9114				503036	1420.44	21.897	325.165	15.5016	26.8506	2.8681
		103044	1346.65	19.2423	386.057	17.4835	218.685	46.3767				202200	420.611	5.9571	182.549	11.1886	57.0584	20.8137				3030221	2396.57	33.567	464.751	21.8139	13.4733	1.751				402274	1657.85	25.7768	330.148	15.3198	199.249	44.2161				503037	2533.16	37.2278	533.556	25.6235	28.2255	2.9517
	V13	103045	721.342	11.1542	208.944	9.8736	87.7144	16.1121				202201	947.551	13.1051	378.388	21.9148	42.2086	14.9417				3030222	2680	36.2749	405.164	18.9227	150.541	30.2745				402275	1083.3	17.8329	299.861	13.9192	130.235	30.3322				503038	2139.36	31.8346	478.86	22.365	112.25	18.863
		103046	845.471	12.7693	270.31	12.7547	91.6175	20.8093				202202	1006.82	13.0084	317.001	18.8286	46.1591	14.2414				3030223	2237.5	30.4757	401.722	19.0283	59.0655	7.0464				402276	742.246	12.2875	221.393	10.1874	77.8239	18.2395				503039	2206.29	32.2033	415.484	19.4413	79.0153	11.4052
		103047	564.585	9.1182	196.365	9.1854	76.5278	14.2139				202203	948.245	12.4281	317.694	18.9501	36.2222	10.7674				3030224	2971.82	40.4446	368.785	22.5197	134.521	21.9275				402277	2125.88	33.1087	460.341	21.4169	130.235	17.0379				503040	2676.41	38.3908	492.113	23.5503	63.0247	8.5247
		103048	777.627	11.8454	240.262	11.7376	73.91	16.5704				202204	1072.45	13.9977	349.994	20.583	48.0027	15.126				3030225	2293.33	31.7648	424.702	20.3836	79.8488	13.6866				402278	3431.89	51.5771	683.268	31.8075	227.803	33.7276				503041	2511.04	36.0468	430.262	20.2363	49.4956	5.2181
		103049	802.117	12.2565	213.704	9.9227	85.847	16.6784				202205	1242.5	15.8444	381.322	21.6228	48.6923	12.842				3030226	2380.49	33.9665	576.126	27.8092	29.3388	3.1125			N33	402279	3258.84	49.892	1208.98	56.0172	407.512	69.3068				503042	1859.45	27.6313	346.017	16.2591	51.5662	5.1071
		103050	1027.3	15.4901	244.938	11.4959	93.9516	17.766				202206	1517.83	19.6329	469.197	27.0651	53.2335	11.3877				3030227	1873.36	26.585	417.299	20.0047	17.2803	1.726		0.6512	weight	402280	2393.62	35.862	621.829	29.039	364.954	75.3717				503043	2581.55	38.3963	510.816	24.4403	69.7399	10.0557
		103051	879.463	12.6627	207.818	9.6482	91.4006	16.7754				202207	1170.05	14.7652	315.233	17.9506	157.631	40.3287				3030228	1270.66	19.1638	400.594	19.2664	37.309	4.0738		0.3141	part1	402281	1382.12	21.5137	397.833	17.9896	421.534	96.7084				503044	2540.05	37.4511	520.113	24.9572	54.1821	9.4665
		103052	567.38	8.6757	162.78	7.9412	80.6705	19.4848				202208	1117.04	14.0715	315.16	18.2218	120.805	31.2396				3030229	1642.16	24.1731	470.976	22.5488	124.172	18.9594		0.3371	part2	402282	383.706	6.3044	165.996	8.0032	124.251	23.4413				503045	2608.79	38.1758	453.281	21.3322	56.9197	11.3114
		103053	1083.49	15.6543	195.841	9.4652	182.258	42.6537				202209	2154.93	26.4148	507.435	28.236	98.1895	22.8183				3030230	1186.52	17.9888	358.249	17.1663	39.951	4.5155				402283	106.416	1.7368	23.5777	1.0504	73.8032	17.7434				503046	2150.92	32.3036	496.119	24.2338	55.7547	7.53
		103054	667.43	10.0041	154.702	7.2573	143.402	30.9683				202210	345.156	4.5189	64.8059	3.5831	152.165	64.0772				3030231	2018.26	29.1413	380.09	17.2619	285.5	63.4281				402284	566.457	9.9151	350.366	16.4323	49.4527	8.4545				503047	2423.57	35.5879	514.467	24.5209	71.4997	9.888
		103055	1011.38	15.0984	261.829	12.4592	180.595	39.5419				202211	1856.26	23.5312	516.698	29.1947	143.864	39.9142				3030232	1920.7	27.7658	396.312	18.1788	294.484	65.1331				402285	2036.62	32.0079	878.767	40.8021	271.459	41.2682				503048	3502.13	50.522	633.897	29.6951	65.9572	10.8282
		103056	2051.59	28.5882	335.697	15.6855	119.553	22.3159				202212	1317.73	16.4405	326.069	18.1341	91.9791	24.011				3030233	1595.48	24.0136	456.954	21.1675	256.584	57.6731				402286	1777.56	26.4488	501.657	23.1348	346.845	71.5653				503049	2282.21	32.9647	393.319	18.583	111.875	21.6736
		103057	878.823	12.6895	131.088	6.3332	181.16	35.7717				202213	1447.42	18.1744	328.313	17.3924	39.3997	7.7474				3030234	1990.5	28.7053	406.56	18.7233	175.43	34.6878				402287	279.035	4.8181	129.874	5.9233	44.3531	6.5352				503050	2567.39	37.7168	483.197	22.455	108.57	19.919
		103058	1562	21.8648	255.935	12.0469	140.469	28.3712				202214	1724.59	21.415	408.225	23.3059	47.5568	11.7989			N32	3030235	475.05	7.3834	102.661	4.4032	111.413	21.3618				402288	2839.49	42.9976	987.26	46.026	378.201	56.233				503051	3338.62	47.983	594.065	27.9842	83.4389	14.9578
		103059	857.077	12.5176	163.35	7.6153	153.887	34.8257				202215	1551.83	19.4475	334.803	18.6514	36.3201	7.4604				3030236	217.32	3.6572	44.0923	1.8148	119.729	24.8257				402289	2713.31	41.3174	831.531	38.4734	356.773	62.4809				503052	1921.38	27.7546	306.023	13.9505	134.585	28.7796
		103060	819.636	11.863	151.124	7.0559	122.684	21.2201				202216	916.702	11.2751	175.873	10.2115	165.436	47.2333				3030237	892.706	13.1595	173.859	7.7897	115.695	20.1134				402290	2108.4	30.9597	428.197	19.9587	532.847	108.573				503053	2633.1	37.7712	444.866	20.376	73.1499	13.6501
		103061	694.089	10.4938	195.232	9.6544	125.164	18.7464				202217	1921.52	23.9666	474.812	27.7485	185.359	57.2376				3030238	1200.89	17.3071	219.35	9.2754	140.941	22.6525				402291	557.659	8.8492	239.719	11.2541	41.674	9.293				503054	2562.58	37.0957	443.38	20.425	81.1265	15.769
		103062	1332.16	19.5596	304.416	14.3154	117.908	21.4951				202218	626.344	8.1453	300.751	18.3435	145.759	50.5467				3030239	877.31	12.843	178.594	7.3477	136.124	21.985				402292	2045.87	31.6001	700.31	32.4709	158.091	17.0289				503055	2273.67	32.6136	331.73	15.0699	83.1848	14.5195
		103063	1259.4	18.5097	260.439	12.4724	134.939	23.4052				202219	2712.01	33.2561	611.355	31.4956	245.814	47.4616				3030240	638.127	9.7819	156.196	6.8641	83.7036	12.2735				402293	3081.67	45.8613	1007.66	47.3828	289.978	38.4024				503056	2585.87	37.2991	399.192	18.3071	67.4304	10.5448
		103064	697.936	10.17	92.0719	4.3879	149.24	23.4663				202220	2792.89	34.6064	752.733	38.8971	224.82	45.6808				3030241	1189.71	16.8517	190.016	8.1193	101.22	14.5053				402294	4464.89	65.9274	1313.05	61.5602	449.906	67.7255				503057	2631.83	38.4568	481.571	22.1008	50.3891	8.6367
		103065	1076.74	15.3563	179.613	8.7085	171.684	31.4423				202221	2340.6	28.9302	629.952	35.6786	104.033	26.0917				3030242	1359.82	19.8915	219.683	9.3663	116.456	16.1015				402295	3485.69	52.7653	1174.3	54.4118	391.271	63.3817				503058	2519.81	37.8339	558.062	26.5705	48.3892	5.2855
		103066	1168.86	16.5878	189.204	9.1346	132.196	21.9577				202222	2203.3	27.7201	551.303	30.5902	72.5306	16.0884				3030243	942.176	13.8088	145.587	6.2709	167.749	22.9236				402296	2868.83	43.5779	894.183	41.4165	437.636	75.4945				503059	3149.9	46.4605	664.956	31.4769	49.8609	5.6815
		103067	904.859	13.1899	143.407	6.8559	93.893	15.706				202223	1124.15	14.5243	332.02	18.0698	69.2495	19.508				3030244	1302.57	18.7654	244.717	10.7255	127.011	24.0518				402297	3361.94	49.5356	794.697	36.8851	425.765	73.0477				503060	2995.6	44.6751	718.351	34.3144	70.2169	7.8893
		103068	650.902	9.8634	121.453	5.8854	142.885	30.6153				202224	1577.59	20.1839	446.049	25.1065	56.1171	14.9777				3030245	1100.21	15.9066	202.094	8.7823	121.562	18.7593				402298	2082.55	30.702	414.364	19.0969	429.797	78.3952				503061	2271.55	33.5263	448.118	20.7995	63.2496	10.1069
		103069	800.718	12.0193	187.054	8.8967	103.879	18.4722				202225	1413.24	18.1508	370.988	21.0936	44.0746	9.4756				3030246	737.253	11.1693	143.355	6.1181	106.096	14.5089				402299	1897.15	27.4745	328.507	15.3763	407.447	74.2956				503062	2346.35	34.1567	477.751	22.311	99.0418	14.6098
		103070	1119.33	16.426	244.644	12.0368	113.146	25.4676				202226	998.423	12.7468	230.783	12.6381	104.645	41.0794				3030247	1414.15	20.0795	203.32	8.7247	134.814	17.4109		2007-08-20	N11	403001	267.207	4.4316	133.346	5.9633	33.8183	3.2141				503063	3787.45	55.0865	836.449	39.7852	98.8555	12.5337
		103071	1284.85	18.7502	335.548	16.5168	100.887	20.9216				202227	1657.5	20.8707	454.929	25.8557	68.6746	14.4424				3030248	1383.97	19.8447	219.134	9.4432	120.503	15.5129				403002	2195.81	31.4818	665.608	30.8735	138.738	15.7735				503064	1655.05	25.3415	344.187	15.8411	180.76	30.3066
		103072	654.796	10.0556	159.838	7.5346	77.1929	15.899				202228	1472.88	19.0578	434.977	26.2078	57.9944	14.0833				3030249	1286.97	18.2325	164.656	7.6068	148.555	20.1688				403003	2245.44	30.6811	536.233	24.9511	109.822	14.0954				503065	620.71	9.5485	100.724	4.6202	146.826	32.5934
		103073	2003.12	28.6981	428.354	20.97	98.6601	16.704				202229	1393.23	18.2489	386.255	22.134	73.2934	16.4948				3030250	1519.81	21.6558	242.646	11.2281	110.055	15.3353				403004	2093.48	29.2055	540.304	24.8023	98.9593	12.3744				503066	1700.75	24.7398	233.614	11.0524	199.226	35.4229
		103074	1302.52	18.3583	219.726	10.8082	150.729	24.7733				202230	2208.78	27.9123	638.251	36.6322	81.4652	14.9875				3030251	1420	20.8576	257.279	11.6454	96.5176	11.0143				403005	3222.16	44.6922	857.907	39.9642	185.31	27.3296			W22	503067	1763.88	25.4095	261.229	12.1608	49.9546	7.9521
		103075	993.465	14.143	140.753	6.8673	149.559	26.4209				202231	1739.45	21.8119	423.886	23.8868	116.825	24.6044				3030252	946.643	14.1119	178.527	8.206	89.245	9.234				403006	2522.47	35.6256	725.359	33.3716	158.606	23.2903				503068	1605.94	23.3768	230.408	10.5528	69.8041	9.6018
		103076	1064.87	15.7749	218.427	10.6395	142.668	21.198				202232	2133.21	27.4034	723.662	43.5754	73.6492	15.8771				3030253	998.991	14.8817	201.415	9.424	84.0617	11.8157				403007	3637.1	50.9072	939.695	42.9354	270.992	41.3121				503069	1213.6	17.7327	153.55	6.9069	89.7772	14.0043
		103077	1098.07	16.3466	247.072	12.1769	87.151	13.9672				202233	1502.78	19.3414	395.033	22.4269	83.0699	20.4315				3030254	1159.85	16.7765	180.727	8.5211	130.102	21.2402				403008	4021.59	54.7215	1020.48	48.2704	158.29	18.7218				503070	1955.14	27.9163	254.718	11.9162	77.7401	10.7736
		103078	1238.08	17.5833	224.209	10.7644	111.583	20.5357				202234	1805.28	23.0974	504.832	28.5604	89.1619	22.9385				3030255	1169.19	17.1295	204.06	9.4487	128.781	19.6919				403009	3245.78	44.2586	820.335	38.7612	187.435	24.6391				503071	711.11	10.6691	90.8146	4.0444	103.74	19.3325
		103079	1394.85	19.6658	220.025	10.5411	127.051	20.3281				202235	2589.93	32.9254	719.704	36.381	284.842	59.25				3030256	1551.96	22.1141	205.921	9.5251	138.135	21.0624				403010	4220.22	56.9174	897.164	42.3108	296.265	42.4428				503072	855.633	12.8638	156.373	7.2231	70.4947	14.4478
		103080	1599.98	22.8484	350.188	17.1332	111.043	20.1995		2009-08-20	V11	203001	2159.35	31.4551	578.85	25.7684	157.929	27.0427				3030257	1618.92	23.2512	216.146	9.9814	167.541	21.7316				403011	2354.42	32.7219	498.313	22.8689	293.437	58.6068				503073	1425.73	21.1519	233.052	10.5047	92.1497	17.2068
		103081	1937.5	27.7645	426.869	20.876	120.634	18.038		1.4152	total dry weight	203002	1853.25	27.3183	513.01	22.5035	238.468	40.4186				3030258	1216.62	10.2845	273.324	13.7366	157.568	23.8997				403012	2545.3	34.3332	455.26	20.9444	295.326	58.706				503074	1650.59	23.7614	223.63	10.2685	84.3105	14.2725
		103082	1703.9	25.0714	571.778	28.0666	67.8152	9.9425		0.4503	part1	203003	1629.29	23.3594	317.223	14.9542	103.087	20.2542				3030259	1853.51	25.9498	210.74	14.5003	92.8234	16.0385			N12	403013	3451.37	48.375	345.463	16.3529	224.709	40.9954				503075	958.453	14.3339	147.964	7.0212	87.3203	15.4148
		103083	3430.3	49.006	1128.82	58.4121	137.141	16.8678		0.9649	part2	203004	830.331	12.5275	151.108	6.8218	78.8767	15.3918				3030260	1389.75	19.8238	226.679	10.5237	116.579	16.6342				403014	466.953	7.2899	100.972	4.582	18.4212	3.0626				503076	390.991	6.3104	55.8472	2.4995	54.1515	9.8528
		103084	2820.05	40.1401	886.818	45.676	117.155	13.1964				203005	2540.11	35.7528	404.96	18.9861	100.812	16.1711				3030261	1411.17	20.343	232.801	10.873	100.779	10.043				403015	2580.75	37.1922	471.58	22.0292	89.0861	10.463				503077	1179.59	17.5055	176.437	8.2656	83.6776	16.1253
		103085	2428.24	34.7284	736.262	37.3152	128.558	16.7274				203006	2028.89	28.4651	331.064	15.5123	113.466	19.5551				3030262	1056.42	15.5852	195.573	8.6813	145.349	27.3008				403016	5052.72	73.7162	932.211	43.8779	195.482	25.6797				503078	1467.12	21.5042	199.549	8.9747	81.833	12.8562
		103086	3083.01	43.5829	900.383	46.3717	136.196	18.089				203007	2176.64	31.8723	568.754	24.6728	262.597	56.5625				3030263	1664.33	23.9911	254.45	11.7473	124.752	17.2278				403017	4683.59	67.1265	647.441	30.1067	186.944	26.0322				503079	1328.8	19.5228	184.735	8.6684	67.4409	10.7382
		103087	2413.26	34.684	723.407	37.4785	94.5215	11.3635				203008	2253.84	33.1018	691.767	31.1384	206.281	41.3207				3030264	1410.43	20.5143	255.409	11.8077	82.1464	12.6795				403018	4624.8	67.1142	540.34	24.6624	283.387	40.9541				503080	1508.52	22.2494	221.072	10.6247	72.0728	9.0858
		103088	2511.9	35.7806	696.42	35.2289	96.1884	11.8354				203009	3137.47	44.2457	677.6	32.7803	93.9296	10.8614				3030265	1677.27	23.9853	281.323	13.1627	127.989	15.6115				403019	2632.42	37.4721	227.005	10.3824	315.518	52.3145				503081	2208.31	31.2384	263.311	12.2399	84.0525	10.9799
		103089	2474.2	35.5152	716.743	36.2055	91.9244	11.2193				203010	2355.56	32.9902	600.712	27.903	169.763	29.5753				3030266	1514.12	21.7247	219.401	10.1919	92.7882	10.4601				403020	243.607	4.1327	82.7045	3.8069	21.0601	5.3036				503082	1474.89	21.2453	179.958	8.4362	68.3771	9.1078
		103090	2905.77	40.9441	858.275	43.8744	137.845	18.3648				203011	2483.69	35.1057	754.142	34.9334	164.93	26.5699				3030267	1174.4	17.4738	190.195	8.784	68.3182	6.7369				403021	3202.82	46.4437	561.52	26.2354	108.794	15.5254				503083	1269.88	18.4697	134.364	5.984	127.849	21.1585
		103091	1629.12	23.5862	428.105	21.2772	92.1414	12.4406				203012	3684.74	51.0091	811.403	39.7237	140.852	17.779				3030268	1043.26	16.0926	212.679	9.8155	62.9754	6.7561				403022	2597.18	37.0366	360.681	16.3757	81.7433	14.3931				503084	1575.79	22.4318	169.732	8.0589	78.27	9.4591
		103092	1821.93	26.18	538.12	28.2561	105.273	12.6749				203013	2176.64	31.8723	568.754	24.6728	262.597	56.5625				3030269	1980.02	28.1271	458.454	21.512	153.998	23.5821				403023	995.251	14.873	129.479	5.81	100.436	22.1249				503085	1527.26	22.0894	181.362	8.5734	57.609	6.9462
		103093	2079.38	29.6232	580.324	29.4085	99.2446	13.22				203014	2253.84	33.1018	691.767	31.1384	206.281	41.3207				3030270	1956.43	27.385	497.672	23.7658	107.397	21.9508				403024	662.295	10.1044	133.338	6.1376	18.1582	2.6408				503086	704.93	10.7574	211.12	10.1737	149.147	22.0015
		103094	2486.28	35.8728	865.838	45.1635	105.216	11.5123				203015	1693.96	24.8467	272.261	11.2593	321.73	60.5333				3030271	2364.97	33.3965	630.246	23.5746	143.805	29.9874				403025	368.833	5.96	65.3916	2.9058	18.6537	3.041				503087	1224.16	18.0936	324.851	15.6957	140.325	17.0287
		103095	2533.52	35.6281	732.328	38.0753	172.916	23.5386				203016	2607.45	36.7891	736.317	33.4993	145.191	21.2791				3030272	2647.95	36.8906	676.336	31.4449	149.197	24.8333				403026	3506.3	50.4569	609.733	28.3935	128.609	17.2504				503088	2097.72	30.9102	413.598	19.5968	97.5098	12.7367
		103096	1856.5	26.8564	493.462	25.0119	84.9229	10.186				203017	2499.71	35.3149	631.572	28.4025	221.765	37.7378				3030273	1806.95	26.0408	492.343	23.4041	18.5402	1.7296				403027	4979.98	72.9969	959.217	44.6972	168.494	23.9356				503089	2631.06	38.5657	554.731	26.2896	93.1424	12.2382
		103097	2051.84	30.2489	682.845	35.0492	61.0891	7.3939				203018	3051.56	43.0295	812.982	37.4264	164.264	24.5097				3030274	1269.62	18.1694	258.359	11.8094	100.886	17.7275				403028	4825.05	70.5023	904.089	42.3278	159.63	25.0551				503090	2522.28	37.0698	514.712	24.2824	138.327	18.9555
		103098	1989.6	29.209	614.286	31.8967	79.6631	9.7981				203019	1945.77	27.4494	267.679	11.4064	377.395	73.3583				3030275	1129.05	15.9113	170.263	7.7913	129.336	24.7436				403029	4262.07	61.8919	581.834	26.9053	170.875	27.1109				503091	2219.48	33.2512	518.699	24.355	97.1576	14.0374
		103099	1915.72	27.4463	524.221	26.0778	123.66	18.4044				203020	1278.1	19.3765	375.522	16.6238	141.173	21.8056				3030276	1744.41	23.8961	344.954	16.3096	77.3805	10.0013			N13	403030	3346.77	44.9866	544.495	25.8383	559.298	92.3045				503092	2655.1	39.2404	546.952	25.2915	84.282	12.3154
		103100	1712.9	24.7692	490.53	24.7884	107.044	15.7437				203021	2176.64	31.8723	568.754	24.6728	262.597	56.5625				3030277	1137.22	15.9213	183.948	8.4763	126.066	28.3155				403031	456.403	7.4657	219.4	10.2242	33.4931	6.1196				503093	2652.85	37.5844	381.28	17.5198	145.821	22.5442
		103101	367.808	6.031	175.009	8.7112	43.3998	8.8149				203022	2253.84	33.1018	691.767	31.1384	206.281	41.3207				3030278	936.495	13.1397	143.664	6.4715	89.6284	17.5662				403032	2428.83	34.9499	849.98	38.9678	212.923	26.8729				503094	3144.77	44.3738	374.666	17.3017	154.048	24.3321
		103102	1961.01	27.6252	366.723	17.436	224.222	44.2161			V12	203023	2327.36	34.0297	730.653	33.1405	177.916	38.2707				3030279	1239.25	17.2055	176.77	7.955	103.794	19.3042				403033	1862.63	26.3637	486.599	22.2967	157.085	24.5419				503095	4479.71	64.5628	762.04	35.9011	194.541	24.2484
		103103	1573.88	21.8954	235.957	11.2073	255.959	51.8964		1.5063	total dry weight	203024	2506.92	36.0146	688.453	31.2849	192.73	39.2929				3030280	1216.46	17.0147	179.588	8.1815	128.972	25.3665				403034	841.739	12.3405	184.734	8.3392	164.739	32.1609				503096	4242.23	61.4295	726.551	34.3005	212.672	27.0033
		103104	1742.68	24.1811	318.531	15.5297	207.114	40.9377		0.4931	part1	203025	1027.11	15.3437	219.733	9.5513	186.891	41.0778				3030281	1090.56	15.3864	148.436	6.6896	133.73	27.0141				403035	331.676	5.5143	170.758	7.7237	36.8519	6.3029				503097	2558.75	36.8807	338.228	15.3674	238.835	36.7943
		103105	1751.37	24.1512	282.65	13.54	241.922	52.875		1.0132	part2	203026	1187.04	16.8573	158.785	7.0027	136.804	22.8106				3030282	1114.01	15.6531	163.636	7.3023	125.952	22.2121				403036	2298.4	32.8331	804.499	37.1033	235.625	35.6537				503098	2141.34	30.3699	201.231	8.9796	219.706	35.0992
		103106	2119.58	29.5083	434.535	21.3899	224.835	44.5262				203027	918.931	13.4042	120.35	5.2558	97.1663	16.3161				3030283	1140.88	16.0013	176.316	7.8754	129.35	23.0429				403037	2185.05	30.5155	461.554	21.1244	293.099	57.7025				503099	2162.27	30.7563	250.936	11.5477	143.567	19.1573
		103107	2277.53	31.7123	478.483	23.5712	224.951	47.4133				203028	2311.2	34.0676	799.974	36.3185	171.827	35.2003				3030284	1420.47	19.8079	222.092	10.0444	122.549	22.694				403038	215.028	3.6818	151.125	7.1597	31.3518	7.3376				503100	1621.07	24.6384	350.893	15.8016	173.549	28.5039
		103108	2308.72	32.1296	526.126	25.8318	237.131	45.9028				203029	2783.92	40.7324	991.096	45.9815	129.414	22.2911				3030285	1394.06	19.4544	210.743	9.4068	89.3843	14.0637				403039	1743.12	25.0201	600.516	28.1468	138.814	21.8863				503101	2019.34	29.4997	381.88	17.7146	113.778	17.9046
		103109	2014.31	28.4502	452.048	22.5373	228.677	37.7151				203030	1257.33	17.8689	188.162	8.2521	115.473	21.3334				3030286	1407.36	19.8446	233.999	10.9037	59.4616	10.1264				403040	1144.64	16.7455	278.331	12.7086	165.993	33.2463				503102	1917.49	28.2613	345.327	15.8999	103.222	13.8116
		103110	2121.24	30.1341	502.245	25.182	206.332	33.6445				203031	2466	35.2925	617.888	28.6061	133.039	17.3771				3030287	1558.6	21.6196	225.189	10.2816	110.597	18.9905				403041	421.926	6.5678	158.781	7.281	31.0699	4.8393				503103	1752.09	27.2158	483.517	22.4566	33.5835	4.2252
		103111	1867.44	26.6886	451.16	22.9333	167.207	23.9046				203032	3130.96	44.2909	755.622	35.5489	140.944	18.7916				3030288	1050.28	14.5954	148.807	6.7175	133.25	25.6593				403042	2775.48	39.6225	1025.9	48.8145	128.988	13.2397				503104	1876.73	28.1739	459.378	22.651	112.718	18.7988
		103112	2398.55	33.8589	636.401	32.5345	171.041	23.9979				203033	2450.78	35.2474	607.1	28.7313	97.8167	11.8049				3030289	1591.1	22.4153	285.278	13.1473	63.0589	9.5599				403043	4638.17	65.0734	1430.89	67.9533	260.354	32.175				503105	2133.47	32.1799	517.927	25.4183	100.072	15.8852
	V21	103113	1671.28	24.0943	389.629	18.3503	123.922	18.0807				203034	2111.71	30.1044	487.021	22.5448	102.704	13.7335				3030290	1358.96	18.9701	266.335	12.1461	58.0764	9.0047				403044	4794.56	65.8995	1192.51	56.2206	283.602	36.8012				503106	1737.43	26.0911	404.071	19.6268	105.833	18.8407
		103114	1965.26	27.6988	421.058	19.6547	142.757	21.9204				203035	2524.94	36.4555	726.631	34.6227	108.884	11.9595				3030291	1851.71	25.4891	314.45	14.6557	81.2059	13.0498				403045	3671.55	51.4702	920.095	42.5413	311.322	43.6528				503107	2517.87	37.5532	609.045	29.0054	88.957	14.1058
		103115	1720.53	24.3388	426.622	19.8889	182.234	31.9551				203036	2494.9	36.1156	554.772	23.1668	199.153	34.1135				3030292	1235.72	17.3987	214.604	9.8692	93.2973	15.8984				403046	3187.01	42.6188	481.845	22.5271	426.391	72.0964				503108	1576.29	23.7802	396.27	19.6502	86.4447	13.9402
		103116	1593.09	22.5481	314.487	14.8722	164.888	24.1723				203037	2387.57	34.9715	580.933	23.9877	216.977	41.4673				3030293	1441.72	20.2381	269.558	12.3767	67.0393	9.2811			N21	403047	315.392	5.2206	121.87	5.5266	22.9439	5.3672				503109	1621.42	24.7007	397.143	19.1478	61.009	9.8131
		103117	1877.84	26.4691	410.405	18.9149	172.643	27.482				203038	1291.73	18.821	210.69	8.4082	344.833	70.7563				3030294	1662.38	23.4764	299.712	13.6132	46.66	5.8188				403048	3390.7	47.7977	960.708	44.6426	180.859	26.788				503110	1793.86	27.1939	464.149	21.6384	83.684	20.0564
		103118	2273.74	31.7772	443.488	20.5626	188.363	27.2627				203039	1761.37	25.1219	262.443	10.7436	362.654	67.5909				3030295	1141.62	16.0938	196.962	9.0689	82.1337	14.5269				403049	3457.05	49.3153	917.076	41.9391	218.55	38.3424				503111	2230.95	33.527	532.206	25.1611	79.411	13.6438
		103119	1792.75	25.2875	393.339	18.4148	135.043	21.804				203040	1187.04	16.8573	158.785	7.0027	136.804	22.8106				3030296	1370.9	19.0042	228.676	10.2465	93.1779	20.1718				403050	1984.41	27.9254	341.019	15.3634	261.446	55.8352				503112	2560.75	38.9491	640.914	30.0688	78.5078	11.0386
		103120	1515.54	21.7669	298.203	13.5568	111.167	14.362				203041	1257.33	17.8689	188.162	8.2521	115.473	21.3334			N33	3030297	473.714	7.2899	214.03	8.909	171.356	27.138				403051	399.53	6.5644	142.437	6.4339	22.9093	3.8638				503113	2396.03	36.1708	591.242	27.5013	85.9372	14.8925
		103121	1436.76	20.3346	289.138	13.1302	126.122	19.2391				203042	2550.96	36.3618	584.452	27.0068	99.5417	12.2951				3030298	799.697	11.7743	354.246	15.7473	89.4377	11.1204				403052	3919.79	55.1464	1062.45	49.9993	196.694	24.9239				503114	2115.42	31.8139	536.788	25.2138	88.0404	18.626
		103122	1656.98	23.6281	335.623	15.7346	122.358	15.5711				203043	2524.94	36.4555	726.631	34.6227	108.884	11.9595				3030299	1330.93	18.6742	327.757	14.131	206.798	39.4902				403053	4565.71	63.5298	1014.33	47.1329	246.708	33.9745				503115	2103.91	31.9846	564.08	26.4724	77.4032	13.0941
		103123	1891.33	26.6306	362.147	16.8452	122.018	17.8753				203044	2115.51	30.5969	503.8	21.3726	115.804	19.397				3030300	1251.58	17.8598	330.557	13.9831	241.297	43.4376				403054	3551.88	53.9258	1359.89	62.1992	347.523	54.9586				503116	2417.82	36.2688	628.324	29.583	89.3943	15.2059
		103124	2086.9	29.1331	387.698	18.1142	138.682	20.1298				203045	2263.85	32.28	502.837	21.579	133.79	24.1009				3030301	1240.42	17.7641	326.769	12.0089	245.143	44.2294				403055	3029	40.7447	370.921	17.0828	290.584	51.4071				503117	2905.73	42.7488	602.774	27.7673	92.1209	15.8089
		103125	2443.33	33.5484	398.967	18.5095	188.993	27.8282				203046	2694.5	39.46	863.404	39.7661	160.162	27.9293				3030302	1548.91	22.219	430.605	14.8067	196.24	31.151				403056	2151.66	29.3622	310.752	14.3868	209.101	36.3825				503118	2497.56	36.9935	556.756	25.395	114.808	23.7016
		103126	2032.95	28.6024	391.981	18.5019	165.418	25.0484				203047	2597.13	37.5566	793.697	36.0431	134.691	24.6136				3030303	1658.23	23.1164	313.342	17.9012	176.36	38.6463				403057	247.516	3.9057	68.3689	2.9938	20.1513	3.9896				503119	2671.69	39.4682	597.404	28.1267	71.3401	11.8989
		103127	2666.5	37.037	524.933	24.8125	141.861	18.1447				203048	2255.61	32.8811	696.209	31.4708	164.727	39.8467				3030304	1612.35	22.535	382.662	16.4801	176.478	33.5248				403058	1168.68	16.4073	173.817	7.859	149.303	29.9736				503120	2770.67	40.42	551.183	25.6204	91.577	18.2589
		103128	2283.01	31.8312	441.579	21.1833	141.189	15.9442			V13	203049	1717.74	22.6999	328.633	16.1462	74.1823	19.881				3030305	1668.44	23.7343	388.01	16.6546	207	39.265				403059	2850.44	39.0846	590.557	27.8086	150.531	23.1091				503121	2440.24	36.5637	587.957	27.3318	75.3075	14.0588
		103129	995.128	14.9667	289.159	13.4175	165.157	25.2651		1.6148	total dry weight	203050	2871.95	38.1709	673.641	33.8556	132.007	24.3086				3030306	1847.69	26.2009	472.761	20.6013	157.704	28.71				403060	2816.57	39.1386	599.834	28.1837	118.493	15.5544				503122	2429.07	36.2539	552.521	25.0919	83.4224	16.6784
		103130	1232.93	17.8056	317.585	14.7298	163.897	23.5018		0.6012	part1	203051	2501.92	33.3624	562.903	27.6361	117.723	21.2293				3030307	1757.31	24.6803	472.466	17.682	112.479	20.6661				403061	1457.45	20.0922	207.6	9.4756	152.086	31.9376				503123	2297.88	34.1998	537.49	24.9426	95.2991	19.2385
		103131	1488.12	21.4693	346.636	15.7304	178.721	23.8606		1.0136	part2	203052	2999.58	39.9893	651.022	32.9721	95.9499	15.0508				3030308	755.532	11.0578	164.128	6.5184	66.3701	11.7088				403062	3346.22	46.524	752.31	35.0679	115.678	15.6059				503124	2297.88	34.1998	537.49	24.9426	95.2991	19.2385
		103132	717.03	10.6822	191.256	9.1268	83.1034	10.8832				203053	1002.54	14.8708	237.946	10.3998	77.1402	15.1928				3030309	979.456	14.0399	227.657	9.3163	93.0608	19.5397				403063	2124.76	29.3878	415.996	19.2858	132.515	18.27				503125	1750.32	25.684	328.7	14.9997	130.754	30.4177
		103133	1600.75	22.9612	369.053	17.3134	139.321	21.672				203054	858.268	12.1564	201.886	8.7283	75.0457	14.3457				3030310	847.202	12.3367	217.619	9.0919	76.9846	14.7085				403064	3074.78	41.6908	463.781	21.6348	221.831	35.2374				503126	1850.92	27.4611	405.302	18.5939	115.353	27.7025
		103134	1680.87	24.3026	421.451	19.8106	158.506	22.9291				203055	553.706	8.3288	158.134	7.1841	66.2356	16.6627				3030311	936.255	13.232	184.509	8.5127	78.1572	13.5863				403065	1778.85	24.2093	235.648	10.7987	299.414	57.7564				503127	1811.35	27.1766	407.06	18.7365	99.303	21.6867
		103135	1476.65	20.7906	276.462	12.7196	141.035	28.0417				203056	1057.37	15.0284	190.25	8.5627	149.645	36.4759				3030312	1050.19	15.0757	214.519	10.3306	61.0943	9.3206				403066	3035.38	42.4043	657.291	30.6457	165.691	23.7242				503128	1884.39	27.9032	373.857	17.1346	90.3689	18.9183
		103136	2212.42	31.3355	515.404	23.5303	203.174	34.6088				203057	651.344	9.6041	150.286	6.5654	117.743	26.4829				3030313	1215.26	17.0233	204.287	9.5036	54.7127	9.1869				403067	3436.3	46.6566	556.475	26.0965	198.306	32.4638				503129	2559.83	36.9431	485.661	22.9042	68.3399	11.9155
		103137	1098.7	16.413	322.414	14.8337	122.391	20.4225				203058	987.009	14.4947	254.355	11.2713	148.28	33.8148				3030314	733.276	10.6755	163.534	7.4416	46.7615	9.7612				403068	2930.45	40.118	500.407	23.138	196.555	33.6447				503130	2495.69	36.0576	429.989	19.8002	56.4581	9.3303
		103138	1652.62	23.23	344.01	15.9798	216.187	42.4611				203059	1253.89	18.0005	325.97	14.942	82.8343	17.8914				3030315	951.94	13.6304	190.271	8.7675	78.0697	15.6544				403069	2130.35	28.1225	227.288	10.4177	198.362	38.2732			W23	503131	1633.52	23.4436	216.226	10.3261	84.5311	13.4883
		103139	1471.25	21.0216	337.344	15.5755	224.858	45.1556				203060	639.015	9.6535	155.275	6.8162	63.3803	13.5962				3030316	848.746	12.0122	143.378	6.3163	66.111	12.822				403070	1128.14	15.0831	118.558	5.5173	213.012	50.2277				503132	1664.31	24.0437	212.927	10.0812	94.9945	12.3866
		103140	1235.82	18.185	331.642	15.3648	127.742	23.1889				203061	1524.36	20.9906	248.629	10.8983	115.334	24.262				3030317	886.3	12.5312	154.753	6.8513	72.4391	12.7354				403071	2437.68	33.5381	454.109	21.288	125.82	18.7561				503133	2093.58	29.9969	223.943	10.5499	96.9135	12.067
		103141	1298.11	18.6464	300.364	13.8651	108.956	21.0231				203062	836.421	12.0171	158.687	6.8892	126.351	29.7816				3030318	1020.28	14.4167	180.918	8.1706	87.7769	15.8438				403072	2474.08	34.3063	427.375	19.7951	186.505	30.6659				503134	1802.68	26.5101	257.995	12.3301	94.5149	12.2618
		103142	1346.19	18.9506	263.598	12.0726	132.782	22.5728				203063	799.882	11.3887	146.81	6.3832	100.731	18.1466				3030319	1029.35	14.7907	195.635	9.281	48.8506	7.0592				403073	1478.45	19.9949	182.946	8.4453	177.562	34.5802				503135	1696.4	24.7293	227.345	10.5006	92.0164	12.7852
		103143	1625.16	22.4688	368.646	17.621	214.523	43.653				203064	677.362	10.0742	189.659	8.7339	102.768	16.0312				3030320	826.962	11.9916	107.564	4.8426	44.333	6.8984				403074	3036.85	42.2813	660.721	31	150.573	19.0414				503136	1575.8	23.4283	242.632	11.4151	95.137	13.779
		103144	1342.24	19.1835	329.512	15.3441	159.815	29.0871				203065	1300.06	18.7776	295.726	12.9505	96.8103	18.3818				3030321	1016.09	15.0133	132.11	6.2589	67.8697	9.494				403075	3460.8	47.713	693.927	32.876	219.656	31.045				503137	1695.65	24.5793	191.288	9.0519	130.14	19.5345
		103145	1700.69	23.7107	333.169	15.511	149.762	26.3632				203066	1229.05	17.7696	253.005	11.2832	110.793	20.0153				3030322	958.26	13.9047	130.252	6.1913	71.4468	12.517			N22	403076	3352.27	47.5186	654.08	30.9347	177.652	25.847				503138	1548.59	23.227	236.723	11.0546	99.8681	15.7994
		103146	2057.7	28.6153	448.902	20.5406	134.747	19.3732				203067	681.115	9.7634	89.4437	3.9695	122.536	20.0675				3030323	1113.83	15.9173	135.86	6.3926	61.1956	9.528				403077	4889.36	69.3104	835.827	39.6637	402.147	62.4278				503139	959.304	14.297	121.483	5.5652	110.072	20.0581
		103147	1589.06	22.3066	275.232	12.6977	159.459	29.2441				203068	1050.79	14.7423	174.486	7.8782	140.964	26.8883				3030324	957.966	13.6933	120.215	5.5584	38.6805	6.4916				403078	3644.33	50.0092	461.318	22.0389	484.937	82.014				503140	1528.79	23.4133	220.337	10.3809	39.3909	4.3889
		103148	1806.41	24.8793	351.907	16.553	154.369	21.4666				203069	1140.69	15.9246	183.803	8.2637	108.541	18.7774				3030325	700.395	10.2597	79.28	3.2538	30.17	3.8509				403079	3155.53	45.6669	613.969	28.4185	164.048	22.5851				503141	1737.6	25.228	262.393	12.533	72.5117	12.1171
		103149	1805.92	24.9158	354.013	16.3843	134.74	23.344				203070	883.052	12.6625	139.314	6.2022	77.0921	13.4312				3030326	975.907	14.1143	117.427	5.3557	63.4294	11.9979				403080	3181.89	45.9363	634.875	29.1645	207.118	27.9657				503142	1173.13	17.6813	179.666	8.3018	115.618	20.4888
		103150	892.247	12.8441	167.45	7.7524	155.826	29.0888				203071	635.215	9.469	117.986	5.3243	117.317	26.1811				3030327	853.508	12.0222	95.1901	4.0581	89.7118	19.6413				403081	3057.47	45.1285	616.692	27.8575	207.114	34.5542				503143	1642.01	24.4066	251.723	11.5675	97.9203	16.6772
		103151	418.24	6.7506	132.685	6.2329	78.1827	11.2187				203072	781.42	11.5387	181.715	8.0485	85.291	15.7967				3030328	820.92	11.8588	109.817	4.9595	62.8501	13.9381				403082	3222.88	46.3324	578.045	26.5565	198.992	33.7356				503144	1791.32	28.0325	341.443	16.0841	26.3071	2.5761
		103152	1450.3	20.6831	312.76	14.2267	209.761	31.4591				203073	1954.84	27.5507	416.127	18.9706	81.0062	14.2846				3030329	933.92	13.344	111.498	5.1466	68.8682	15.1023				403083	3239.39	46.0459	477.781	21.7611	199.001	35.9305				503145	2692.46	40.2626	462.336	21.9654	63.6365	6.1577
		103153	545.149	8.4135	180.064	8.2707	82.071	16.6547				203074	1271.13	17.6243	213.454	9.7777	123.758	21.1852				3030330	928.775	13.0352	102.575	4.4853	81.6623	19.3592				403084	971.454	15.4217	317.927	14.5326	99.7891	11.5216				503146	2694.34	38.9615	485.313	22.5662	81.9035	12.9491
		103154	1696.88	23.9645	338.84	15.6194	197.228	45.7564				203075	969.522	13.5775	136.735	6.2125	122.798	22.5942				3030331	1014.46	14.3308	116.887	5.2771	90.7676	19.3781				403085	2935.32	41.5529	511.306	23.7091	205.682	36.1079				503147	2977.81	43.1508	530.198	24.6973	79.2839	11.4841
		103155	1708.68	24.1768	372.146	17.3552	237.023	49.0606				203076	1039.21	15.1442	212.192	9.6251	117.139	18.1277				3030332	1053.29	14.7144	117.801	5.4175	74.8229	14.6241				403086	3481.25	49.0804	644.094	30.3114	196.726	33.6585				503148	2322.33	34.3775	478.466	22.4691	53.4433	7.6185
	V22	103156	1434.07	20.3989	308.447	14.3615	112.692	22.4126				203077	1890.81	26.6544	414.684	18.8856	99.0485	15.4254				3030333	871.572	12.8457	102.251	4.7278	63.6294	8.3824				403087	2388.44	34.0717	369.556	16.9674	275.409	59.6887				503149	2533.52	37.9244	543.687	26.0867	29.886	3.5055
		103157	1347.34	18.9281	249.718	11.2841	135.782	20.5324				203078	1662.84	24.069	555.457	25.3906	55.6806	8.5025				3030334	1301.76	17.9087	128.277	5.9727	70.7038	13.4106				403088	3555.32	50.6485	632.519	29.4268	272.177	50.1639				503150	1401.22	22.1106	305.822	13.5587	327.694	69.0677
		103158	2068.45	28.0764	308.638	14.2585	97.8937	16.6966				203079	3347.63	47.0466	1096.6	52.8428	112.601	14.4247				3030335	782.773	11.207	84.978	3.5869	63.3559	12.7121				403089	4151.16	59.8394	1018.23	48.4964	161.277	19.7125				503151	1488.57	23.3612	305.634	13.4694	370.8	78.9669
		103159	1649.47	22.3023	224.925	10.2187	94.7277	13.8948				203080	2355.09	33.2972	702.757	33.9051	77.6082	9.7176				3030336	1455.05	20.2106	166.665	8.1336	149.915	34.5998				403090	4898.57	68.896	804.733	38.6614	336.139	49.9458				503152	2273.47	34.1489	376.37	17.1558	283.376	53.4594
		103160	1052.97	14.6092	179.806	8.0388	119.677	18.9496				203081	2451.36	34.35	676.54	31.87	78.9768	10.1212				3030337	1551.44	21.9368	198.086	9.7023	138.634	25.7553				403091	1248.14	17.1344	144.731	6.6945	274.616	58.402				503153	1757.27	25.8669	230.417	10.4116	384.465	76.049
		103161	1060.68	14.848	194.321	8.618	127.928	17.1146				203082	1778.02	25.1333	522.759	25.562	86.4361	10.8391				3030338	1702.99	23.8197	207.927	10.499	135.506	28.054				403092	1046.85	16.0647	291.076	13.3899	205.682	34.6427				503154	1287.34	19.6499	186.351	8.2685	300.164	55.8821
		103162	1586.8	21.9612	240.726	10.7284	114.034	16.7642				203083	2029.26	28.4388	563.758	26.6046	81.4861	11.3052				3030339	1950.52	57.4849	75.5461	0	164.592	39.9298				403093	212.977	3.2722	53.4907	2.4474	9.7965	1.2915				503155	2487.2	36.4767	456.273	21.0588	150.089	25.0757
		103163	1546.3	21.5709	247.318	11.1542	98.2596	14.7758				203084	2426.36	34.4385	841.122	40.8574	86.389	9.8449				3030340	1813.52	25.7009	117.867	11.0029	82.3008	13.7871				403094	987.806	15.2998	285.29	13.3681	71.4006	9.0843				503156	1688.28	25.2528	230.416	10.246	285.762	53.865
		103164	1180.09	16.2143	177.717	8.1091	101.317	19.4593				203085	2472.47	34.2036	711.423	34.445	141.975	20.1293				3030341	2193.2	31.4011	212.911	12.0345	50.9829	5.8312				403095	2351.47	34.0252	478.204	22.1996	136.657	18.7182				503157	2446.49	36.092	476.812	22.1286	83.2111	16.1295
		103165	1263.57	17.3017	155.61	6.8867	91.5802	12.9339				203086	1811.76	25.7826	479.376	22.6272	69.7271	8.7107				3030342	1800.04	25.4179	186.642	8.8701	253.677	64.6109				403096	2889.19	41.4306	544.431	25.0741	178.974	25.9596				503158	2656.95	39.8158	545.651	25.4556	114.349	16.8117
		103166	1050.46	14.6565	161.904	7.3904	59.0349	8.9429				203087	358.944	23.7789	476.528	22.425	87.8897	13.4634				3030343	1768.67	24.7422	184.19	8.7662	202.781	49.9903				403097	3488.84	50.1596	725.315	33.4974	188.386	28.1977				503159	2740.16	39.5923	490.828	22.583	150.5	24.0912
		103167	1338.82	19.525	274.658	12.4438	81.5726	13.8112				203088	1913.75	5.7899	170.013	7.8806	35.634	7.5382				3030344	1692.17	24.3344	210.72	10.0465	238.294	31.6024				403098	4073.85	57.5769	778.769	36.2566	214.848	30.2919				503160	2708.14	39.4561	517.651	24.1411	134.904	22.822
		103168	1024.49	14.3478	175.726	7.7831	104.811	13.7753				203089	1535.95	26.5207	356.254	15.7736	184.1	37.812				3030345	1727.1	24.552	223.306	11.021	206.175	46.205				403099	2831.35	40.2248	432.108	19.8129	267.011	47.8569				503161	2565.81	38.0302	545.266	25.6161	112.207	16.3834
		103169	1114.48	16.3057	236.401	10.6748	85.0807	12.6804				203090	1700.68	21.02	229.221	10.1387	210.159	44.3799				3030346	2202.03	30.6538	229.968	11.4395	220.805	42.2216				403100	2821.3	38.8727	398.721	18.6146	257.926	45.2276				503162	3014.99	43.909	549.025	25.4818	110.769	17.8557
		103170	1044.94	14.6098	198.882	9.0621	39.5704	6.9221				203091	1709.16	23.2143	309.438	14.049	170.054	35.0084				3030347	2019.04	28.3774	220.468	10.6804	214.173	48.4104				403101	4631.97	65.7909	1011.47	47.7072	155.081	17.9073				503163	2523.12	36.7168	526.807	25.197	127.641	21.4717
		103171	1416.03	19.786	235.828	10.4755	110.052	17.4555				203092	789.638	30.845	511.108	23.3689	194.7	39.2544				3030348	1142.22	16.2711	124.326	5.7473	61.6731	12.2177				403102	4965.45	70.4299	1025.93	48.7492	187.083	24.3661				503164	3753.59	54.5067	702.261	33.28	109.743	14.629
		103172	1043.56	15.0543	211.451	9.6145	127.757	24.5409				203093	635.306	27.3127	439.145	20.3885	187.759	32.2525				3030349	1411.63	19.974	142.541	6.7393	69.9948	11.4382				403103	4731.29	67.3271	864.099	41.0998	302.458	41.5685				503165	2856.46	41.3407	551.729	26.0827	133.348	18.8372
		103173	1292.83	17.8033	198.175	9.1122	87.6954	14.597				203094	1025.79	11.2605	212.353	10.2378	125.463	42.0605				3030350	1383.36	19.3964	130.523	6.0588	95.9749	17.4086				403104	2567.66	35.4853	340.064	15.8967	336.519	67.116				503166	2920.8	43.1098	598.182	28.2976	119.54	15.709
		103174	1461.35	20.0844	197.189	8.7284	86.2798	16.4478				203095	1092.67	14.9023	253.699	12.9062	67.8299	21.7229				3030351	1271.61	17.9876	132.828	6.1224	66.1858	10.9104				403105	2509.68	34.5318	285.808	13.2758	372.39	65.3058				503167	2912.22	42.792	581.694	27.1924	94.9405	15.0993
		103175	808.631	11.9082	145.837	6.3451	70.3127	10.7798				203096	915.732	12.7365	172.297	8.4668	74.0047	17.2511				3030352	1191.19	16.9201	113.655	5.184	114.298	21.5226				403106	3016.41	41.3359	369.041	17.5994	362.953	57.1503				503168	2435.13	35.8057	465.321	21.6158	139.158	24.6936
		103176	1575.34	21.7097	268.954	11.7346	55.6286	7.4118			V21	203097	1739.1	24.6953	358.244	16.3934	153.452	22.5984				3030353	1317.09	18.7267	118.791	5.3365	107.218	20.6961				403107	417.067	7.0487	183.873	8.4209	26.8386	2.7736				503169	2855.39	41.721	521.469	24.3526	84.8753	13.3642
		103177	696.821	10.8782	196.339	9.0471	82.4523	12.8142				203098	1762.67	24.8429	356.312	16.491	110.785	19.1918				3030354	1783.62	24.3022	114.235	5.0868	157.541	33.8466				403108	1522.17	24.3027	471.512	21.3544	83.7487	9.5148				503170	2923.31	42.6998	609.819	29.2884	117.076	18.3694
		103178	526.758	8.0487	176.382	7.918	91.4423	14.3321				203099	1183.14	17.5993	289.314	13.477	49.1287	5.5226				3030355	1501.69	20.9049	112.844	5.0524	134.688	24.2758				403109	2006.55	30.9773	590.3	26.4969	110.737	13.317				503171	2438.17	35.9821	507.071	24.0491	115.164	20.0492
		103179	1136.86	16.9859	256.28	11.6142	71.3757	10.9753				203100	2109.97	29.9211	474.73	22.2769	51.6445	5.6835				3030356	3702.73	61.2508	254.431	16.3524	592.91	91.0804				403110	2480.22	36.4263	516.764	23.3829	98.3348	13.3546				503172	2426.86	35.7756	486.996	22.373	112.087	21.3138
		103180	1296.85	18.3159	218.457	9.9799	125.353	21.7067				203101	1781.96	25.5864	426.064	19.444	205.384	36.3213				3030357	2250.62	38.5546	284.132	21.6308	262.504	42.592				403111	3405.93	49.8907	733.318	33.1836	159.7	23.8071				503173	1066.76	16.1107	217.49	10.0248	160.087	36.1731
		103181	614.793	9.2314	145.016	6.744	34.0717	5.829				203102	1837.71	25.8828	369.676	16.9021	144.575	21.961		2007-08-17	N11	3040001	1577.53	21.7776	247.069	11.573	64.8097	6.6962				403112	2689.94	39.4857	545.173	24.8787	124.888	17.7842				503174	1460.53	21.706	278.258	12.951	120.479	22.3843
		103182	110.036	1.8729	33.28	1.4453	83.5914	14.0931				203103	2229.29	30.8559	437.856	20.4745	115.317	16.4146				3040002	1825.27	25.2657	294.418	13.8655	60.6389	6.5078				403113	3354.45	49.5994	703.035	32.0979	193.454	26.967				503175	2049.38	29.5696	318.1	14.7312	167.89	33.9441
		103183	718.11	10.85	140.324	6.3507	79.9277	17.0723				203104	2091.55	28.9719	382.824	17.5933	90.5626	10.0476				3040003	1840.6	25.6102	308.522	14.1558	62.6054	7.4306				403114	3782.24	54.5492	719.194	33.3321	188.524	31.2282				503176	2557.06	36.2843	392.964	18.2654	131.21	23.4245
		103184	1114.5	16.2513	206.378	9.5448	73.8559	11.8597				203105	1548.81	22.2081	307.867	14.1356	94.3512	9.834				3040004	2387.34	32.8298	385.124	17.7161	53.7171	5.3972				403115	3782.85	53.8379	727.347	34.1272	212.508	35.0865				503177	2332.37	33.7974	376.405	17.743	138.493	25.2069
		103185	1020.67	14.1917	136.588	6.2483	67.8116	11.1618				203106	2150.28	30.8602	454.497	21.2483	127.604	19.3626				3040005	1635.26	22.7472	321.557	14.6759	85.9824	12.8842				403116	4331.71	63.1419	954.983	44.2169	162.28	22.3186				503178	2606.06	38.2241	528.129	24.3485	171.722	27.9339
		103186	1158.79	15.8432	139.333	6.4062	78.2975	16.376				203107	2115.71	30.1006	462.769	21.6977	99.1375	18.228				3040006	2237.94	30.4667	391.666	18.6011	70.4445	9.8085			N23	403117	2844.52	41.7438	973.261	45.8096	240.232	35.538				503179	2039.67	30.1167	460.663	21.7532	93.252	15.4753
		103187	2414.04	32.6009	358.855	16.8138	81.9997	16.0351				203108	2172.97	30.6831	403.305	18.5461	104.147	21.7804				3040007	1917.28	26.0582	323.021	15.3286	69.4267	9.4285		0.9622	total dry weight	403118	1864.49	27.3387	456.353	20.7784	417.541	83.8022				503180	2290.44	34.8116	568.635	27.4239	75.2677	11.3395
		103188	2815.7	38.4958	411.006	19.0202	47.2733	10.4367				203109	1791.59	25.9634	441.42	21.0687	102.015	14.4993				3040008	1883.28	25.7038	308.702	14.1388	70.9142	8.5453		0.4617	part1	403119	2525.08	36.4024	651.351	30.0355	317.202	57.463				503181	2422.86	36.2483	607.479	28.7691	117.129	16.1424
		103189	2605.59	35.697	396.681	18.4844	54.2545	8.3433				203110	2018.69	28.6031	457.746	21.3184	130.824	19.0397				3040009	2589.96	36.302	608.562	28.4279	92.4952	13.5333		0.5005	part2	403120	2334.64	34.0697	613.791	28.264	323.821	54.2				503182	2726.81	40.7874	564.895	26.4383	75.1893	8.3461
		103190	2528.35	35.0002	463.966	21.6687	63.4021	12.1446				203111	2917.07	40.6061	564.008	25.8167	120.683	20.8501				3040010	2168.25	30.1619	439.53	20.6337	64.3164	10.6982				403121	1871.9	27.8806	628.752	29.0829	210.166	32.1976				503183	2938.87	44.7631	650.457	30.8811	38.8692	4.2938
		103191	2472.76	35.2534	530.282	24.5956	52.9528	8.2527				203112	1900.95	26.4947	349.955	16.156	204.698	41.7332				3040011	2123.49	29.5222	383.513	18.0949	57.7214	6.8339				403122	2606.85	39.1743	1195.08	56.2049	75.4309	7.7104				503184	2454.05	37.8262	560.587	26.3377	55.1673	6.0316
		103192	1743.24	25.169	400.828	18.6153	158.953	26.3329				203113	2138.49	30.3141	429.923	19.5223	198.652	38.3547				3040012	1663.72	23.1022	254.793	11.8284	71.8422	7.9731				403123	4734.9	68.3524	1557.94	74.5738	312.288	35.479				503185	2920.53	45.4086	722.33	33.9381	33.8782	3.9838
		103193	840.383	13.62	251.058	11.6078	184.444	28.1116				203114	2780.87	38.5654	528.567	24.3293	152.669	28.8017				3040013	2276.89	30.9381	408.61	19.6071	71.2099	8.7124				403124	2380.15	34.4271	622.733	28.8514	393.402	84.9086				503186	2888.84	43.4905	537.606	24.9901	81.3739	8.9252
		103194	1142.39	16.1999	211.282	9.7668	202.422	28.192				203115	1600.4	22.3072	272.283	12.1285	246.251	55.4159				3040014	2101.11	28.9346	362.722	16.7868	83.525	9.8029				403125	1759.33	25.4661	411.563	18.875	341.331	61.5068				503187	2813.76	42.9562	611.548	28.6814	62.7021	7.0102
		103195	849.934	12.7589	219.864	10.3387	204.089	31.6612				203116	2193.22	30.3579	395.818	17.7147	133.843	26.2837				3040015	1860.87	25.9487	431.582	20.2592	46.3515	7.3167				403126	2062.65	30.016	548.373	25.3152	411.101	77.591				503188	3136.8	46.5511	651.266	30.6789	82.9251	9.6479
		103196	1056.87	15.7429	239.734	11.147	186.225	25.2908				203117	2134.47	29.8149	394.496	17.7574	148.438	30.3637				3040016	1816.31	25.2292	393.496	18.1508	99.9538	13.5003				403127	2371.81	34.9727	736.602	34.3631	320.459	51.0176				503189	3172.91	47.349	667.659	31.6244	78.7991	9.7654
		103197	1276.78	17.8125	238.7	10.8756	132.698	17.129				203118	1893.83	26.2126	295.155	13.1017	152.204	27.9578				3040017	2016.12	28.2874	420.292	19.5715	71.2731	8.9798				403128	2798.69	40.4116	683.756	31.3085	361.073	63.1083				503190	2818.81	42.0691	622.82	29.6021	74.4131	10.378
		103198	1059	15.3283	201.074	9.2806	131.989	16.5904				203119	2153.88	29.9784	355.179	15.9161	123.378	20.3044				3040018	1426.63	20.1549	292.336	13.8087	82.3692	12.1329				403129	2792.51	40.0477	678.937	31.5309	326.51	51.1214				503191	2728.39	41.0577	604.718	28.6247	44.1995	5.9881
		103199	1029.04	14.8704	173.14	7.8292	58.4724	7.7009				203120	2192.16	30.9089	428.476	19.2143	92.1974	16.6303				3040019	1818.18	25.6613	383.961	17.6073	78.0519	8.8628				403130	2411.69	34.2151	562.125	26.4336	307.476	48.0807			W31	503192	585.491	9.6455	187.534	8.3607	76.7816	14.7704
		103200	2762.9	37.7149	418.744	19.429	6.8659	1.0082				203121	2098.85	30.4083	496.533	23.1003	88.5382	10.1774				3040020	2383.68	33.335	543.244	25.5659	73.6336	9.4097				403131	2684.18	39.0529	710.376	32.8238	283.137	39.5594				503193	1990.98	29.3243	519.363	24.2424	65.7151	11.8378
		103201	761.22	11.2224	160.71	7.2484	104.11	15.6522				203122	2623.68	37.3417	591.643	27.3659	91.231	10.9398				3040021	2730.99	37.1483	533.744	25.1592	53.4693	6.5037				403132	2523.21	36.7773	671.896	30.9359	372.752	56.1732				503194	1555.59	24.4301	512.025	24.1483	68.4284	9.6654
		103202	1065.56	15.5499	250.096	11.326	82.0368	12.758				203123	2495.15	35.9067	639.15	29.8328	128.476	15.1911				3040022	1996.43	27.3688	407.112	19.2959	66.3293	8.767				403133	3079.93	44.1566	754.181	35.29	378.017	54.7771				503195	922.839	14.6056	301.465	14.3018	83.5141	16.3265
		103203	712.359	10.4898	146.65	6.5428	123.455	18.7845				203124	1892.06	26.9461	398.712	18.083	115.728	19.4612				3040023	1804.76	25.6829	479.117	22.2246	64.5786	6.2455			N31	403134	523.079	8.463	229.229	10.5836	34.9966	3.5919				503196	1635.04	24.7619	464.287	21.7327	51.9796	7.9952
		103204	1047.75	15.4557	237.13	10.5096	106.901	14.7332				203125	1954.37	27.4528	425.078	19.397	181.218	28.1316				3040024	113.727	1.8188	27.8962	1.333	186.34	36.5233				403135	1993.47	28.2428	420.292	19.6619	169.882	19.1225				503197	1636.51	23.5069	403.74	18.9165	43.4271	8.6697
		103205	733.426	10.9895	207.686	9.3674	67.8717	11.0214				203126	3154.72	44.2747	744.228	34.5891	180.877	24.134				3040025	963.044	14.4722	327.611	15.4168	120.989	23.9849				403136	2952.11	40.7154	488.555	22.5939	306.651	48.1892				503198	1154.35	17.8913	445.422	22.497	54.2648	12.1724
		103206	836.833	12.3247	237.97	10.6172	114.306	19.4137				203127	1378.56	20.3677	306.24	13.7722	330.738	58.3564				3040026	1677.21	23.8662	508.587	24.0044	231.032	36.4148				403137	2975.16	40.7129	531.162	25.0242	195.898	25.9165				503199	1501.1	23.0712	444.37	22.0669	61.3651	14.3041
		103207	850.5	12.5768	219.839	9.8504	89.145	14.7567				203128	517.015	7.6744	89.6188	4.0168	268.649	62.7596				3040027	1468.14	21.3495	478.212	22.933	222.98	35.0666				403138	2978.76	40.4139	569.806	26.6357	161.029	20.386				503200	1225.26	19.0515	381.042	18.0319	64.9362	9.9931
		103208	883.255	12.7792	213.78	9.7592	87.2962	13.9802				203129	1416.62	19.8841	207.857	9.6089	364.525	68.2079			N12	3040028	963.05	13.1707	221.418	10.7301	102.129	14.8646				403139	3316.54	46.5915	744.367	34.619	313.13	51.7339				503201	1080.48	17.1129	361.142	16.6029	95.3931	14.5993
		103209	779.213	11.3258	180.12	8.1477	109.04	18.814				203130	1507.23	21.7983	316.627	14.0924	299.653	54.217				3040029	1148.38	15.4749	222.575	10.6743	126.238	18.2787				403140	2567.89	35.8961	572.038	26.767	155.558	24.5334				503202	1778.74	25.7122	430.994	20.0362	79.9721	12.8701
		103210	801.619	11.5392	201.623	9.3193	102.775	20.8642				203131	1877.53	26.0993	344.589	15.7984	196.452	34.0562				3040030	1649.37	21.8975	314.777	14.9427	83.224	11.6727				403141	3247.42	44.3748	639.312	30.0396	229.646	36.0782				503203	1470.49	22.3088	462.617	22.1973	66.8372	10.1879
		103211	623.095	9.0887	148.249	6.6152	108.378	18.6519				203132	1782.84	25.0036	311.605	14.18	178.224	26.2708				3040031	1490.88	20.1778	298.644	13.987	186.539	25.2099				403142	2699.77	37.7758	550.711	25.6068	327.22	65.1925				503204	1996.06	30.6012	657.891	31.3635	98.7943	14.9921
		103212	828.099	11.9284	213.714	9.7125	84.8806	15.3116				203133	1629.05	24.0787	436.301	20.0275	57.9859	8.0367				3040032	1098.48	14.8907	200.179	9.4442	91.2342	14.255				403143	2225.8	31.2316	497.563	23.3335	237.791	42.7278				503205	1982.3	30.1112	644.703	30.9916	78.006	10.5801
		103213	1884.23	26.2209	440.612	20.6443	70.8969	10.9806				203134	1744.94	24.9263	414.519	20.2009	194.621	35.757				3040033	1266.66	17.1924	204.714	9.4576	69.3451	10.6991				403144	2313.38	32.309	471.933	21.9284	197.775	33.1091				503206	1217.95	18.2344	240.524	11.2175	68.7736	9.3821
	V23	103214	1057.24	15.7118	303.81	14.4623	90.1202	17.9169				203135	1983.65	28.4705	467.35	22.6689	172.785	30.2151				3040034	1127.26	15.1565	185.77	8.6314	69.6434	10.5737				403145	3453.73	47.7264	838.903	39.9419	140.143	16.1986				503207	2007.91	29.8817	423	19.4039	63.0445	7.8313
		103215	1144.01	16.567	255.117	11.7846	99.5536	19.7086				203136	1615.42	23.0836	364.612	17.5038	182.733	35.8368				3040035	1147.46	15.8376	205.565	9.4363	38.433	4.9304				403146	3852.53	53.1259	873.986	41.5175	255.274	34.3687				503208	1502.51	22.3643	323.125	14.9413	61.6549	8.5673
		103216	926.636	13.7027	274.929	13.443	84.0761	17.0741				203137	2341.05	33.2245	549.571	25.8679	153.595	26.8305				3040036	1274.79	17.4649	211.868	9.8222	35.9319	4.3137				403147	3129.01	45.1652	814.569	38.1303	422.338	61.7166				503209	2185.63	32.1492	581.811	27.0677	75.4013	12.6297
		103217	1642.9	23.0627	299.11	14.1927	85.9561	11.1663				203138	1465.6	21.039	357.573	17.5247	149.257	26.5155				3040037	1300.8	17.9788	228.218	10.7039	27.9775	2.7137				403148	1446.37	19.7721	189.565	8.7139	406.424	84.8089				503210	1302.18	20.1772	304.101	13.9361	81.0699	11.0141
		103218	1264.66	17.851	226.54	10.4213	107.951	18.298				203139	1507.55	21.8534	358.361	17.0766	105.339	18.6655				3040038	1449.69	20.0981	241.018	11.2748	13.2587	1.1048				403149	1693.7	22.9733	225.46	10.4594	444.521	94.5497				503211	1590.78	24.411	394.334	18.1857	60.6753	7.59
		103219	1666.92	23.3927	342.125	16.195	134.868	24.3061				203140	1667.89	24.0593	418.824	19.2978	144.49	38.149				3040039	1266.25	17.2584	203.883	9.4559	26.2794	2.8819				403150	2255.47	30.0509	281.627	13.1611	410.357	70.5306				503212	1659.16	24.0395	376.214	17.2926	62.189	12.8003
		103220	1243.48	17.4982	258.342	12.1607	160.006	30.1505				203141	2074.29	29.6624	480.235	22.4395	137.113	25.9518				3040040	942.379	13.5192	155.539	7.178	6.814	0.6557				403151	2524.63	34.5172	326.952	14.9787	510.341	87.641				503213	866	13.6839	264.988	12.1807	73.6382	13.2363
		103221	1603.78	23.0857	305.071	14.3647	66.0416	8.2475				203142	2380.92	34.4595	578.327	26.8163	135.553	20.9965				3040041	1447.76	20.0087	300.787	13.9794	119.202	18.6015				403152	460.346	7.1823	152.413	6.9801	38.1558	3.8				503214	1328.53	20.0535	241.642	10.9616	67.9474	9.04
		103222	1694.13	24.9298	443.511	20.9156	94.9696	15.5391				203143	2227.77	32.0015	533.506	24.5266	148.381	28.3268				3040042	1600.62	21.5684	246.491	11.2707	32.4277	5.2099				403153	2365.77	32.9949	494.052	22.7101	227.441	27.5703				503215	2767.56	40.6899	784.989	37.3076	264.036	34.4516
		103223	2431.45	34.2332	650.921	31.4365	131.547	22.0594				203144	1966.87	28.1467	484.37	22.4864	152.012	35.4283				3040043	1457.17	20.1459	284.936	13.4377	65.5666	8.1617				403154	2690.67	36.1154	467.507	22.0525	221.32	32.6818				503216	2093.76	31.0599	654.6	30.9691	175.698	25.1134
		103224	2166.53	29.8126	390.159	18.587	262.81	46.7607				203145	1956.17	28.2977	508.996	23.6089	133.646	24.9061				3040044	1969.72	25.8512	265.765	12.1545	68.8458	11.1242				403155	3649.59	49.2071	635.046	29.5873	198.474	26.0718				503217	3824.15	55.4005	885.783	40.9054	131.756	21.266
		103225	2281.69	32.2205	517.239	24.8035	120.372	19.2596				203146	2248.03	32.0882	566.967	26.3831	154.35	28.923				3040045	1976.38	27.2465	391.447	18.1628	66.4918	8.2768				403156	2818.44	38.1881	483.104	22.3881	142.034	20.1224				503218	3839.5	55.1772	877.337	41.5988	116.183	19.527
		103226	2639.42	36.87	636.725	30.3356	226.461	39.7533				203147	2701.68	37.8212	543.912	24.7637	159.058	30.0699				3040046	2004.28	27.3148	378.488	17.3993	69.0299	11.6005				403157	2322.72	31.8792	357.882	16.4278	153.202	22.7287				503219	4497.12	64.3429	1008.76	47.4612	136.177	21.5923
		103227	2399.05	34.1012	631.828	30.3527	173.012	27.2069				203148	2322.17	32.7293	502.387	22.648	198.23	45.0826				3040047	2128.54	29.3895	410.856	18.8487	55.5232	7.626				403158	3512.52	47.9315	639.524	30.0017	267.298	38.499				503220	4036.09	58.8601	991.464	46.5164	114.241	17.0267
		103228	2066.44	28.7688	413.371	19.5971	126.781	20.0904				203149	2484.08	34.9187	539.066	25.0843	123.177	22.6328				3040048	2070.6	28.5076	444.573	20.5615	114.889	15.976				403159	3488.64	47.5742	618.557	28.7348	290.534	46.1408				503221	3393.06	48.5328	752.036	34.9566	70.571	10.2322
		103229	1654.59	23.3817	296.075	14.4122	65.0571	6.4212				203150	2576.1	35.7608	497.358	22.8491	158.119	34.7301				3040049	2103.72	29.0043	415.92	19.1463	62.6824	8.6399				403160	2284.02	33.6408	543.862	24.644	430.906	78.875				503222	3500.42	50.937	726.379	33.3752	185.363	24.4837
		103230	1659.58	23.6145	342.769	16.568	79.9989	11.1994				203151	2268.88	32.349	530.541	24.3754	130.027	26.741				3040050	1739.45	23.5734	347.348	16.2765	69.1748	10.2084				403161	2711.16	36.5441	390.579	18.1491	329.044	57.5349				503223	3094.94	45.528	689.311	31.9391	132.197	25.9821
		103231	1384.97	19.2749	303.114	14.1758	211.227	39.0852				203152	2258.49	32.075	498.566	22.3777	144.039	31.7238				3040051	1406.27	20.8761	461.722	21.4466	108.659	16.2844				403162	3543.63	49.191	893.045	42.672	129.76	14.3007				503224	2643.96	38.5034	561.275	25.8191	148.837	30.2467
		103232	1012.41	14.7884	355.895	17.3759	94.6169	17.1584				203153	2136.51	30.2576	485.002	22.2446	164.545	36.5934				3040052	2185.15	29.7726	421.804	19.7074	69.655	8.2203				403163	3980.78	54.0451	838.371	40.5676	296.104	36.6296				503225	3374.56	49.1664	691.731	31.8241	195.132	39.1628
		103233	1013.35	14.4873	236.077	10.8619	78.9685	13.3211				203154	2136.51	30.2576	485.002	22.2446	164.545	36.5934				3040053	2081.71	28.7481	407.168	19.1242	46.8585	6.7895				403164	3977.74	53.2292	658.185	31.8862	377.615	49.6091			W32	503226	1351.01	19.8379	238.68	10.8952	32.7756	3.8758
		103234	2629.8	36.5553	597.685	28.4077	137.163	19.9469				203155	1627.4	22.7234	296.602	13.3773	225.763	57.8572				3040054	1823.98	25.2817	364.984	17.079	39.8078	5.6127				403165	3809.51	51.371	600.476	28.5102	566.518	86.5617				503227	1381.92	20.3358	280.127	13.1446	34.7142	4.9636
		103235	1182.54	17.2938	276.982	12.8775	109.308	18.6614				203156	1720.94	24.2957	365.724	16.5826	199.172	52.6926				3040055	2025.59	27.8952	404.022	18.6037	57.0239	7.4884				403166	1284.95	16.8443	144.075	6.8268	436.703	93.9967				503228	1210.48	17.9075	285.74	13.3881	29.4007	3.8643
		103236	1122.36	15.8555	245.694	11.496	91.824	16.098				203157	1684.15	24.044	367.31	16.7098	171.458	41.25				3040056	1977.61	27.3669	429.519	20.0187	61.1157	7.4913				403167	1906.28	26.7079	341.778	15.8299	487.834	91.6991				503229	1129.71	16.8719	376.156	18.0318	28.3695	5.083
		103237	2820.18	39.1017	542.767	25.4607	120.488	17.7379				203158	1752.06	24.6868	337.349	15.2812	156.033	35.9842			N13	3040057	1370.18	18.8431	251.087	11.6573	146.19	21.4457				403168	884.888	12.0877	127.102	5.9921	173.204	28.814				503230	3287.51	47.2374	956.082	46.7948	174.286	25.1604
		103238	1814.83	25.4761	338.998	15.8103	88.8871	14.3857				203159	2380.07	32.6847	438.235	20.4267	117.997	22.6643				3040058	1457	19.5584	236.759	11.235	144.101	22.4576				403169	461.425	6.9803	169.395	7.7125	47.9621	8.398				503231	2067.74	30.0601	551.063	26.5374	70.4753	9.5282
		103239	1109.23	16.8057	244.692	11.3726	57.9529	7.3262				203160	2320.43	31.9013	388	17.6585	97.4816	17.7472				3040059	1578.78	21.3933	245.604	11.3839	131.599	21.2982				403170	1337.65	19.1817	415.958	19.2972	73.4348	9.8511				503232	368.098	6.1354	205.25	10.0493	29.7133	6.3101
		103240	2331.09	33.1649	431.986	20.5924	90.8173	10.5644				203161	2565.74	35.3369	482.419	21.9801	112.285	19.1837				3040060	1641.13	22.1187	276.954	12.9688	113.814	19.2116				403171	2041.93	28.2041	464.035	21.4647	107.565	19.4067				503233	130.16	2.1756	51.8214	2.4052	13.6136	2.9468
		103241	2663	36.618	536.098	25.9788	204.609	33.7563				203162	2835.68	39.1364	527.037	24.0558	108.694	17.0135				3040061	1425.8	19.5551	270.281	12.8607	92.3273	11.2223				403172	1165.23	15.9137	186.338	8.4496	219.226	46.8958				503234	947.392	14.2895	276.45	12.7341	47.3404	8.2343
		103242	2820.19	39.2765	673.4	32.4437	124.29	16.6886				203163	2211.49	31.1794	475.613	21.8854	73.2677	11.2866				3040062	1371.35	18.6893	239.718	11.2275	108.508	17.7362				403173	147.15	2.1069	29.0039	1.4329	62.1035	12.0293				503235	1022.5	15.0404	346.15	16.5978	28.7979	5.9171
		103243	1865.31	26.2117	450.341	21.9974	101.613	16.4404			V22	203164	2377.78	34.002	570.27	26.8609	27.887	3.4844				3040063	1536.96	20.7559	234.934	10.9047	151.013	24.6495				403174	391.976	6.0214	133.572	6.0094	50.4925	9.6815				503236	479.812	7.6937	133.166	6.3142	12.0439	1.7892
		103244	1300.77	18.6478	230.216	10.9676	82.7099	10.9042		1.4627	total dry weight	203165	1315.09	19.8238	320.775	13.9611	305.775	68.651				3040064	1680.25	22.5151	242.284	11.2041	138.372	21.0541				403175	1782.88	25.0534	525.057	24.1707	142.691	15.3106				503237	1929.53	27.9703	597.004	28.4195	64.6794	8.0993
		103245	2060.79	29.0278	392.572	18.7761	169.636	26.9213		0.6526	part1	203166	1397.06	20.945	320.577	13.8691	345.998	78.4904				3040065	1746.2	23.7426	287.442	13.2788	131.501	20.3351				403176	3295.11	44.6694	752.969	34.9397	231.734	30.2052				503238	2970.89	42.2643	1014.89	49.2171	106.242	14.2896
		103246	2567.37	36.6479	742.123	35.8102	164.055	22.2952		0.8101	part2	203167	2133.72	30.617	394.772	17.6649	264.422	53.1368				3040066	1568	21.4588	251.461	11.8727	91.5984	10.3584				403177	4083.05	55.5207	920.717	42.7859	209.549	29.7225				503239	3365.54	48.4201	1288.15	62.563	149.439	19.6555
		103247	673.48	10.1181	121.521	5.7279	97.8941	15.2321				203168	1649.25	23.1916	241.682	10.7205	358.749	75.5902				3040067	1869.88	24.7909	270.066	12.7606	113.948	14.7554				403178	4346.6	58.5481	1010	47.1929	150.96	20.4955				503240	2748.04	39.6541	1006.42	48.7723	105.993	13.7695
		103248	558.397	8.8193	127.87	5.866	71.5156	12.0248				203169	1208.21	17.6176	195.462	8.5139	280.087	55.5449				3040068	1458.04	21.1358	313.06	14.7022	56.0279	4.7533				403179	971.512	13.4972	242.125	11.3064	78.1837	13.2634				503241	666.698	10.5368	219.188	9.8546	46.273	8.2217
		103249	734.467	11.4801	157.205	7.3763	92.6834	14.1929				203170	2334.3	32.7041	478.582	21.6838	140.049	24.9244				3040069	992.732	14.6366	218.597	10.2054	22.3202	1.933				403180	1571.67	21.2895	319.258	15.1785	126.349	19.02				503242	936.519	15.1918	415.065	19.1594	61.792	9.9637
		103250	713.478	11.1619	157.989	7.2663	124.339	23.4148				203171	1584.5	22.641	241.682	10.55	266.648	53.54				3040070	1519.39	21.6178	270.238	12.6176	30.2781	3.0011				403181	1031.63	14.3656	220.33	10.205	110.882	17.9397				503243	880.103	13.7873	279.211	12.7179	43.9959	7.8827
		103251	1186.18	17.1364	213.34	10.1259	138.298	25.2289				203172	2296.1	32.3592	500.125	22.7853	77.6452	16.0322				3040071	1564.33	22.9868	359.293	16.893	33.6473	2.7867				403182	1454.54	19.8069	274.863	12.8007	133.296	21.5072				503244	462.534	7.9815	251.167	11.5486	24.2703	4.1728
		103252	570.214	9.0058	146.196	7.0501	69.678	10.8242				203173	2493.62	35.6978	572.33	26.211	106.7	16.7102				3040072	1417.96	20.2699	258.44	12.0549	24.5185	2.2555				403183	1590.89	21.4385	303.319	14.1228	123.256	18.6189				503245	350.78	6.063	183.001	9.2809	13.7279	3.5415
		103253	954.358	14.6682	220.882	10.462	106.704	16.8915				203174	2571.72	35.4975	514.826	23.2532	140.434	23.9458				3040073	1560.94	22.4755	311.974	14.5479	56.26	4.6783				403184	1423.21	19.1679	264.646	12.2955	138.979	24.2993				503246	935.403	14.0506	245.531	11.0981	41.7924	5.8143
		103254	1317	19.0922	226.247	10.7223	123.407	19.2207				203175	2541.66	35.3753	542.96	24.8575	125.881	22.6843				3040074	1539.23	22.4272	311.132	14.6761	36.2574	3.5492				403185	1630.89	21.6867	275.587	12.9614	89.8107	16.7989				503247	661.558	10.7006	255.795	11.4957	30.7405	4.5843
		103255	1076.16	15.8309	193.499	9.3852	96.7631	11.9009				203176	2408.09	34.0969	571.926	26.3763	104.702	16.2846				3040075	957.772	14.2581	220.155	10.3427	11.8537	0.9679				403186	1621.04	21.9633	362.675	17.3633	112.197	15.724				503248	1128.57	17.5086	341.317	15.278	39.1924	4.9991
		103256	1022.68	15.0678	197.971	9.1943	108.88	14.1794				203177	2829.66	39.3677	575.869	26.238	103.36	17.7479				3040076	1770.65	25.3202	328.296	15.4554	25.132	2.0952				403187	1798.85	24.1033	325.438	15.406	104.812	13.0905				503249	3833.51	53.8866	933.367	43.4869	74.0671	10.3832
		103257	1148.71	16.4428	198.868	9.563	130.364	19.3509				203178	2368.02	32.9193	552.564	25.9447	119.104	21.3421				3040077	1521.71	20.6756	251.915	11.6557	201.509	36.3226				403188	2578.24	34.7901	444.961	20.3113	276.286	53.958				503250	3137.91	44.6808	704.282	32.5164	45.8406	7.2339
		103258	497.884	7.8326	114.234	5.3377	120.975	20.0746				203179	1283.17	17.7955	185.407	8.5166	116.204	16.2436				3040078	1699.38	23.4292	302.007	14.375	146.294	19.4056				403189	2642.74	35.6974	562.408	26.6561	150.216	25.1235				503251	2562.52	36.6624	575.993	26.0368	37.7592	6.5294
		103259	650.717	10.2445	168.766	7.7886	129.955	22.1232				203180	1064.3	15.3137	156.181	7.2675	115.583	15.7328				3040079	1528.09	21.1718	281.151	13.0295	171.434	33.7241				403190	2458.44	33.4692	469.279	21.5356	207.448	32.4228				503252	3224.83	46.5169	789.953	36.5548	45.1902	6.6753
		103260	746.512	10.9832	129.726	5.9915	121.29	20.6839				203181	1034.19	14.8563	134.484	6.1309	51.2044	7.3028				3040080	1901.1	25.3404	277.416	13.018	212.758	33.5156				403191	2663.51	36.1273	527.208	24.083	176.156	29.3295				503253	2674.23	39.1498	682.841	31.5944	57.6494	8.7637
		103261	653.375	9.9109	140.717	6.6497	90.9825	13.4357				203182	2776.72	37.679	325.253	15.2146	6.0125	0.9561				3040081	1820.79	24.9166	308.694	14.3693	162.649	26.0098				403192	2583.61	34.8344	451.646	20.7519	131.251	15.3668				503254	2716.14	38.4086	528.721	24.3718	39.0797	6.5503
		103262	463.892	7.5292	130.326	6.0224	131.605	21.8642				203183	3522.85	48.8694	736.597	34.2676	102.403	14.5407				3040082	1764.38	24.5791	341.044	16.1732	104.088	15.6688				403193	272.267	4.4227	106.551	4.7599	37.0645	6.9775				503255	2645.01	37.6361	597.601	27.347	46.8468	8.2152
		103263	654.84	10.3717	161.308	7.2874	188.612	30.4873				203184	2680.87	37.065	578.704	26.8567	124.429	18.7236			N21	3040083	138.718	2.312	29.4788	1.2604	57.4585	12.8385				403194	994.576	14.8596	282.828	12.878	151.621	24.477				503256	2355.79	32.8944	399.173	18.1281	52.7076	9.4832
		103264	474.739	7.3527	120.236	5.5366	125.387	27.3303				203185	2741.25	38.6511	627.428	29.1374	111.545	15.6142				3040084	563.03	8.4348	87.5936	3.8597	152.108	36.3666				403195	52.6819	0.7451	6.1268	0.2636	17.1763	4.2358				503257	1960.06	28.4963	351.421	15.5546	65.4926	12.4403
		103265	217.178	3.642	51.6406	2.2819	123.492	31.7876				203186	2733.2	38.3662	610.135	27.9994	88.5901	15.0082				3040085	668.577	9.5321	103.118	4.7846	132.342	24.026				403196	632.37	9.7258	164.518	7.4399	138.087	26.9977				503258	1425.76	20.9197	243.979	10.667	72.1024	14.1014
		103266	892.122	13.1049	203.622	9.7949	130.206	25.733				203187	2285.44	32.1025	488.072	22.2573	129.85	24.5446				3040086	1712.37	23.2282	259.016	11.9498	115.409	17.6817				403197	1474.94	20.8923	349.912	15.7975	196.909	32.9203				503259	1639.33	23.532	250.04	11.0959	73.1257	14.5601
		103267	1200.11	17.2352	256.901	11.663	158.619	28.9816				203188	2679.87	37.406	546.966	25.0753	79.1981	13.2836				3040087	894.872	12.819	141.442	6.4207	210.196	49.1772				403198	291.187	4.6648	119.214	5.541	29.3608	5.2637				503260	1950.2	28.549	368.384	16.2767	73.4705	14.2147
		103268	876.736	12.7897	209.168	9.2391	153.186	28.1276				203189	2743.61	38.2836	639.635	30.1575	109.245	18.2586				3040088	1477.32	20.4928	243.171	11.3242	234.922	50.6641				403199	896.177	13.4635	259.567	11.6305	170.065	28.5042				503261	1705.43	24.8346	323.225	14.3634	61.9354	11.2935
		103269	637.709	9.7413	182.936	8.631	82.948	15.7027				203190	2288.29	32.2607	531.863	24.7628	107.46	19.9282				3040089	622.343	9.4648	129.118	5.9139	132.538	27.6704				403200	2404.86	35.0701	831.696	38.7927	284.844	34.1741				503262	981.783	14.4211	168.594	7.3813	50.0639	10.1045
		103270	1188.93	16.7817	222.546	10.2092	113.916	18.5581				203191	2277.68	32.0755	510.807	23.0369	104.59	21.1852				3040090	584.227	8.7143	78.5573	3.4991	163.327	32.2957				403201	3179.28	44.1726	753.134	35.163	350.663	50.5743			W33	503263	1011.74	16.1246	267.61	12.3015	57.4221	7.4566
		103271	1358.93	19.8089	257.292	11.7772	131.062	20.6003				203192	1001.18	14.4444	228.124	10.3223	149.379	35.9548				3040091	1249.56	18.114	266.01	12.5157	132.657	24.4775				403202	2390.41	33.0213	426.078	19.9588	531.25	99.2949				503264	1148.24	17.9329	277.329	12.7692	62.9277	7.5611
		103272	941.56	13.7515	170.511	7.885	188.339	42.1225			V23	203193	1251.61	17.9631	300.056	13.9773	143.733	33.9473				3040092	1427.34	20.1298	287.639	13.2925	147.334	26.4125			N32	403203	2548.12	38.5697	591.806	27.2954	142.198	16.4489				503265	953.411	14.908	212.282	9.6992	46.3652	6.6071
		103273	1301.72	18.6875	286.611	13.4862	142.942	30.7718		1.5712	total dry weight	203194	1756.24	24.4708	343.019	15.8985	200.295	51.4785				3040093	1185.17	16.6171	226.632	10.417	127.305	22.7775				403204	3100.69	45.0312	540.082	25.4843	231.352	34.2254				503266	1396.32	21.4545	327.72	14.8107	61.0628	8.8822
		103274	1099.49	15.8405	236.691	11.0429	136.809	27.8388		0.6825	part1	203195	2191.3	30.0277	423.747	19.7129	156.536	35.5248				3040094	1291.91	18.0531	297.825	14.0877	129.59	24.1512				403205	2947.59	44.4355	529.723	24.5065	479.499	92.8359				503267	591.427	9.2827	127.123	5.468	49.0382	8.3215
		103275	736.77	11.1229	167.896	7.693	119.403	18.5627		0.8887	part2	203196	1998.75	27.9696	405.892	19.1491	165.224	38.2279				3040095	886.779	12.7613	201.26	9.2165	118.448	21.2079				403206	1666.73	25.5501	376.161	17.2209	179.34	33.4993				503268	617.459	10.5871	220.163	10.0351	36.8964	6.2269
	V31	103276	6008.15	78.4507	939.982	50.1557	146.51	25.4993				203197	2233.29	31.633	569.501	26.278	204.868	42.3635				3040096	1185.55	17.013	251.224	11.7895	77.9896	12.1853				403207	3054.36	44.0591	502.582	23.4485	116.57	12.9042				503269	1629.37	24.1233	229.674	10.518	74.1905	7.976
4.1506	total dry weight	103277	6331.45	82.2034	904.515	47.8896	116.556	19.8196				203198	1747.92	24.9236	496.75	23.477	111.251	23.4692				3040097	1014.82	14.4804	163.276	7.457	167.497	30.1026				403208	4309.03	60.9953	665.414	31.3953	221.448	28.0873				503270	979.673	14.7489	169.274	7.7359	51.7021	5.494
1.6031	part1	103278	6520.58	84.9008	930.554	49.5251	120.834	20.7573				203199	1962.82	28.8089	613.18	29.5971	89.7955	17.1971				3040098	1132.44	16.006	193.461	9.2055	143	23.8903				403209	4728.62	65.5815	610.273	28.8107	304.76	44.3094				503271	893.686	13.909	183.802	8.2693	45.5451	5.0565
2.5475	part2	103279	2958.43	40.9164	831.097	44.4239	374.975	92.8745				203200	1472.64	21.1269	227.644	10.5991	63.1927	8.8367				3040099	1522.11	21.2936	286.504	13.4313	131.734	21.7624				403210	3388.48	47.0068	315.145	14.8004	392.871	69.8				503272	884.296	13.9853	215.306	9.5726	68.9325	9.6372
		103280	4359.9	59.8838	1050.93	56.4271	136.865	25.9852				203201	1555.6	22.8145	330.948	15.4328	90.8728	16.6491				3040100	1426.23	19.7227	238.292	11.1908	147.624	22.3668				403211	1246.01	18.3944	197.394	9.2299	142.325	23.1998				503273	1081.22	16.618	193.817	8.6569	66.7411	7.6503
		103281	4148.48	57.2558	1049.69	56.9502	141.588	24.9073				203202	2232.63	31.3285	485.718	23.1957	125.873	23.6352				3040101	1522.02	21.1661	256.226	12.3829	142.109	22.9973				403212	1313.82	20.2125	342.086	16.116	87.745	11.2254				503274	1597.44	24.2874	334.761	15.411	73.9071	9.1298
		103282	3216.14	43.7466	615.608	32.9263	87.5113	18.4515				203203	1989.37	27.283	291.137	13.7145	251.473	50.1011				3040102	1600.24	21.7631	277.089	13.434	117.947	21.9347				403213	2622.63	38.0329	520.028	24.546	159.178	24.8241				503275	1000.12	15.0302	207.485	9.5662	53.6171	7.8672
		103283	1806.48	25.3834	431.05	21.2129	324.296	84.1043				203204	1519.29	21.3977	220.932	10.6342	62.2506	6.8799				3040103	1366.82	18.977	238.706	11.2559	134.839	17.2283				403214	1784.02	26.5445	338.134	15.5806	128.891	23.8851				503276	1239.14	19.0662	268.417	12.2605	59.9315	6.6458
		103284	1825.6	25.668	415.276	20.2941	312.995	80.2238				203205	1523.87	21.6108	255.775	12.2248	76.548	11.9994				3040104	1742.59	24.5022	306.159	14.1897	85.5228	10.1417				403215	1486.8	21.8906	206.212	9.4319	246.435	56.6421				503277	1246.62	18.4973	286.868	13.2217	58.5888	8.9481
		103285	2077	29.2331	526.184	26.2042	331.2	91.6517				203206	1271.72	17.6394	226.184	10.4597	202.115	41.8773				3040105	1530.34	21.5396	221.949	10.2861	85.5827	9.6738				403216	885.675	13.6436	208.943	9.612	89.412	18.2699				503278	1129.12	17.0694	232.322	10.7045	63.5734	8.7202
		103286	2116.75	29.7108	494.946	24.3968	320.258	80.3629				203207	929.622	13.5336	265.57	12.8209	90.5353	18.3841				3040106	1269.88	17.7979	193.783	8.7765	115.322	13.5492				403217	1577.4	23.4217	322.213	15.1862	111.45	21.7652				503279	1213.34	18.0496	271.645	12.3455	74.4539	11.5497
		103287	1905.04	26.6002	495.658	24.4173	314.135	85.693				203208	2076.3	29.9979	655.067	31.0488	139.737	24.4811				3040107	1603.86	22.3444	222.97	10.1488	125.51	14.119				403218	1027.76	15.7539	247.651	11.5272	74.4677	16.2073				503280	1085.72	16.9195	250.108	11.6663	63.3333	8.6035
		103288	1959.75	27.0423	590.671	32.0396	228.53	45.3508				203209	2336.77	33.7543	609.147	28.5334	89.702	12.6574				3040108	1888.87	25.8388	277.962	13.0707	117.86	14.9036				403219	1133.14	17.6829	241.943	11.3252	117.425	25.4257				503281	1652.65	24.403	281.091	12.9298	64.4495	8.0691
		103289	2298.28	31.7986	647.174	35.0932	213.457	36.9612				203210	2518.49	37.0444	701.412	33.3283	46.3716	6.5118				3040109	1089.04	15.3951	186.879	8.7753	127.354	18.5287				403220	1324.12	19.6801	229.531	10.4585	101.83	14.0609				503282	1361.57	21.6441	365.671	16.9189	73.4839	11.0794
		103290	2156.91	30.0314	593.259	31.8567	197.409	42.9233				203211	2103.03	31.3036	604.502	28.4248	65.8155	9.1473				3040110	1942.77	26.4402	317.291	14.8128	138.415	24.4377				403221	288.489	4.933	68.4358	2.9961	25.6942	4.5931				503283	602.729	9.8171	198.855	9.2195	42.8261	8.0477
		103291	2936.07	41.2325	922.076	49.5881	222.169	43.7055				203212	2502.78	37.5787	778.915	36.6275	40.4173	6.0417				3040111	1884.31	25.5548	267.866	12.6431	149.6	23.5279				403222	248.506	4.2573	55.8162	2.4502	30.0332	6.3403				503284	3454.75	53.5709	1155.15	55.4421	260.157	30.7921
		103292	2189.76	30.7309	589.764	30.4401	161.692	46.8566				203213	2475.62	35.9913	579.72	26.9704	97.0804	13.5357				3040112	2261.96	30.9764	374.594	17.8036	143.664	23.8958				403223	1488.73	22.0974	237.611	10.6904	147.495	28.5394				503285	427.431	7.3531	159.559	7.4779	117.63	21.3735
		103293	2961.69	41.085	828.918	43.6936	219.54	49.5403				203214	2411.28	35.5491	659.455	30.9543	74.8046	10.6314				3040113	2050.69	27.9244	357.013	16.7456	157.95	25.7928				403224	1649.6	24.0768	260.042	11.943	106.174	20.2155				503286	740.391	12.1009	230.545	10.6889	117.873	20.1887
		103294	2614.15	36.1619	709.412	37.9253	177.719	41.505				203215	2688.11	38.5241	702.284	33.11	98.9309	14.6316				3040114	1740.4	24.6682	346.5	16.2167	119.769	15.559				403225	643.367	10.2827	146.441	6.769	58.1212	13.659				503287	595.721	9.8099	229.75	11.106	79.6195	13.9781
		103295	2672.65	37.5822	710.613	37.0799	132.255	29.7968				203216	2719.06	39.1844	719.962	34.1304	94.0086	14.8098				3040115	1522.19	21.1795	238.206	11.1298	118.562	15.7444				403226	224.882	3.7298	56.4968	2.5718	26.9641	4.9015				503288	592.108	9.6723	208.669	9.5868	132.476	23.2391
		103296	2803.98	40.0524	814.697	43.2259	127.658	22.1716				203217	2415.61	34.815	671.61	31.9479	88.776	15.7389				3040116	1309.13	18.7135	271.83	12.6085	84.4306	16.3435				403227	1249.44	18.5496	229.025	10.3967	139.694	26.1707				503289	160.321	3.0161	93.6457	4.3529	64.521	14.111
		103297	2156.91	30.0314	593.259	31.8567	197.409	42.9233				203218	1712.78	23.9876	336.045	16.2309	97.2292	17.6149				3040117	1430.04	20.518	243.976	11.1263	87.2548	16.7309				403228	267.602	4.2938	57.5702	2.6759	28.5169	6.2245				503290	656.633	10.5571	186.321	8.7908	82.6811	13.7844
		103298	2874.65	40.1084	834.135	44.0494	231.47	56.1225				203219	1194.41	17.0656	171.787	8.0926	79.1419	11.6832				3040118	1955.55	27.0717	309.017	14.4451	83.2555	12.5918				403229	1396.37	20.0037	230.249	10.8123	130.777	23.3363				503291	870.474	13.2377	140.866	6.3611	91.3243	13.4678
		103299	2414.09	34.036	729.711	39.3253	222.625	45.2319				203220	1892.28	26.5647	292.938	13.8541	162.318	28.8444				3040119	1391.86	20.0449	230.868	10.5529	106.324	14.5482				403230	837.577	12.6774	170.432	7.9725	88.1228	15.0938				503292	1082.09	17.0041	232.523	10.5427	65.7648	10.3913
	V32	103300	1087.72	14.4592	229.65	11.4142	122.79	34.7082				203221	512.736	8.071	95.417	4.3283	68.4305	12.8838				3040120	956.888	14.0338	204.001	9.55	69.4911	12.5281				403231	384.038	6.2588	91.0481	4.2107	29.3585	6.7233				503293	928.063	15.1	255.604	11.6537	76.7746	12.5163
3.7102	total dry weight	103301	5884.56	80.3886	1312.23	69.6553	176.921	28.8242				203222	674.409	10.506	117.307	5.4427	88.6853	15.2068				3040121	1672.63	23.0894	245.534	11.3339	57.5275	8.0989				403232	997.105	14.7716	185.584	8.7011	106.454	20.1631				503294	808.082	13.3079	224.382	10.2802	62.6383	8.5712
1.2673	part1	103302	7341.64	96.9544	1354.89	71.5045	183.541	28.4695				203223	655.136	10.2148	117.892	5.3615	118.975	25.0875				3040122	1322.15	18.7309	219.612	10.1052	90.2028	17.0177				403233	1365.03	19.3147	204.809	10.0301	87.3802	14.8864				503295	813.281	13.4672	257.695	11.8415	64.8648	9.9213
2.4429	part2	103303	6944.35	90.2058	1107.66	59.1639	113.338	19.1494				203224	1089.18	15.6824	159.195	7.4715	132.332	27.0311				3040123	1077.17	15.5352	176.909	8.1493	54.5889	10.4772				403234	1509.29	22.8557	296.196	13.8053	105.195	16.1348				503296	926.416	14.3789	179.471	8.0961	69.9587	9.0668
		103304	1917.09	25.6389	368.062	19.1957	119.291	32.1378				203225	523.587	8.2417	109.091	5.2019	66.6723	11.5974				3040124	1123.11	15.9636	180.185	8.2285	64.3258	10.6275				403235	1518.98	21.6092	225.174	10.7243	78.842	14.0344				503297	653.995	10.3441	165.71	8.1039	92.7091	13.9921
		103305	2490.25	33.9661	628.913	34.2624	285.967	96.34				203226	2338.12	33.978	652.09	30.893	52.7307	9.0813				3040125	1743.54	25.1988	515.558	24.0551	102.328	18.6579				403236	1205.54	17.4208	178.959	8.2901	97.9874	18.719				503298	783.136	12.3387	173.856	7.9535	96.9526	12.2898
		103306	2475.48	33.8484	656.545	35.5861	237.314	71.8709				203227	1475.29	20.7575	397.918	19.8045	217.187	48.3842				3040126	1664.73	24.4741	515.579	24.3278	93.791	16.5693				403237	1414.61	19.997	202.625	9.8139	63.4229	11.9733				503299	987.538	15.1903	225.37	10.8133	89.2242	12.454
		103307	1358.12	18.4632	385.234	20.8803	167.036	37.8788				203228	1992.96	28.114	595.797	29.4274	170.739	34.707				3040127	1718.49	24.6315	480.688	22.9412	110.615	18.889				403238	1066.83	15.7982	205.002	9.8729	42.5367	6.9705				503300	1123.17	16.8523	158.445	7.5991	58.5686	5.5779
		103308	1496.22	20.1972	378.212	20.2758	96.1647	23.7381				203229	2300.82	32.0123	716.207	35.807	248.953	52.747				3040128	1684.59	24.5242	480.297	22.7267	119.264	17.6732				403239	516.155	7.8958	91.7759	4.3141	28.7093	5.484				503301	1664.81	24.986	433.162	21.2547	130.92	23.5956
		103309	2107.69	29.6565	574.847	28.0205	152.26	28.5493				203230	1886.57	26.385	449.431	21.6891	203.104	52.3325				3040129	1631.66	24.7306	499.84	23.468	28.3037	3.6412				403240	1243.71	18.1065	205.416	9.7538	115.715	20.7748				503302	2248.98	33.841	648.568	31.5822	102.921	16.9256
		103310	2183.1	30.1657	545.427	26.5825	136.052	24.7033				203231	2157.28	30.6755	528.74	25.5052	153.205	35.9771				3040130	1809.77	26.658	508.892	23.8172	69.9291	8.7467				403241	1172.62	17.1605	205.755	9.5144	59.859	8.4155				503303	2596.38	38.5334	779.643	38.429	150.069	25.7232
		103311	2463.43	34.2891	606.955	29.5414	118.46	19.4895				203232	2004.84	28.4989	549.397	26.4916	162.961	39.6887				3040131	1793.89	26.6414	473.935	22.1089	34.7195	4.376				403242	1606.08	22.7806	226.338	10.8646	73.4355	11.5777				503304	2128.92	31.7598	489.237	23.2773	122.43	25.521
		103312	2383.85	33.0695	619.757	30.306	83.2231	14.084			V31	203233	1365.67	19.7596	472.907	24.3683	240.001	60.4667				3040132	1756.37	26.3361	532.558	25.3395	69.8878	8.1508				403243	1964.09	27.7603	306.926	14.6523	90.291	13.2215				503305	2434.4	36.9242	575.571	27.3728	92.3515	17.545
		103313	2322.75	32.528	578.706	27.8014	147.021	24.2612		4.2361	total dry weight	203234	1304.08	18.9156	385.892	19.6132	111.884	28.5155				3040133	2013.6	29.7908	528.764	25.0368	25.4378	2.3552				403244	2725.88	39.5563	442.173	20.5359	116.597	18.2176				503306	2262.39	34.3043	598.058	28.4314	98.2324	19.3551
		103314	1571.09	22.8032	501.868	24.3238	221.779	44.0143		1.4534	part1	203235	2959.85	41.2617	789.701	41.251	37.2807	4.197				3040134	1956.72	29.1302	522.371	24.5851	35.7364	3.5645				403245	2298.97	33.2348	362.952	16.8763	118.997	16.3472				503307	2281.79	34.6509	696.203	33.7329	102.633	19.939
		103315	1351.97	18.3181	300.421	14.7666	44.4078	10.0697		2.7827	part2	203236	2357.12	32.3548	589.426	30.6312	139.329	24.2409				3040135	1610.24	25.8443	593.957	27.7118	30.8879	2.9822				403246	2764.36	39.424	486.702	23.0948	116.162	18.5148				503308	2541.78	38.517	695.348	33.0659	98.265	17.8065
		103316	2385.75	32.7308	525.647	25.425	138.006	22.573				203237	2511.49	34.6333	595.299	30.9636	146.323	28.125				3040136	1843.91	28.4855	611.845	28.6153	30.9541	2.9442				403247	2199.55	32.3285	377.303	17.655	146.583	22.0738				503309	3000.84	45.2716	776.964	37.3084	108.022	18.9407
		103317	2296.68	31.3299	501.736	24.501	114.442	19.912				203238	2285.36	31.3985	542.97	28.3058	135.112	33.4076				3040137	1685.67	25.5963	476.309	22.2381	18.6757	1.8942				403248	2085.91	30.51	370.456	17.536	89.2142	11.6624				503310	2602.77	39.5154	662.125	30.9188	108.544	24.1556
		103318	1938.4	27.123	525.386	25.8674	185.972	35.5992				203239	2537.46	34.8647	622.187	32.5773	130.712	22.6082				3040138	1485.94	23.1578	451.666	20.9495	15.5855	1.5496				403249	1747.06	25.3606	293.905	13.6371	97.2644	16.096				503311	2697.38	41.0132	722.442	34.4971	102.458	16.8107
		103319	1903.74	26.4095	464.081	22.535	177.776	38.1927				203240	2692.3	37.3301	666.151	34.7462	117.476	25.9465			N22	3040139	3757.62	52.8471	711.057	33.6558	309.086	39.941				403250	1094.7	16.6505	271.816	12.9133	76.8067	16.3519				503312	2813.29	42.4308	683.914	32.2061	85.0271	16.4177
		103320	2188.92	30.2421	485.748	23.555	162.365	29.217				203241	2438.6	33.8766	648.122	33.8528	123.462	27.7342				3040140	2405.45	33.3511	327.649	15.1173	301.868	31.1742				403251	1075.27	15.5817	169.177	7.8499	68.8475	12.0735				503313	3219.66	48.2519	807.424	38.4667	72.8207	13.2117
		103321	2468.2	34.0466	607.724	29.6508	148.084	26.0946				203242	2206.23	30.1419	557.827	28.5852	109.491	24.9371				3040141	2188.71	30.2227	324.128	15.0571	301.468	42.1762				403252	2016.74	28.3038	249.025	11.6444	102.029	14.9219				503314	3230.11	48.4358	808.975	38.4537	74.9771	13.9178
		103322	1512.81	21.5301	416.164	20.28	243.027	51.2443				203243	2318.98	31.9081	665.435	35.3501	128.148	22.5668				3040142	2776.82	38.4989	397.721	18.2498	314.917	27.073				403253	1641.71	23.2493	230.074	10.8851	124.109	22.6522				503315	2963.72	44.393	718.119	34.1395	71.9	14.8937
		103323	1498.96	21.0789	404.755	19.9385	206.307	42.9737				203244	2220.05	30.7773	630.68	33.7709	161.967	33.8985				3040143	1067.61	15.6044	190.546	8.7813	172.145	31.5987				403254	2117.85	29.579	259.913	12.2246	115.688	18.4702				503316	2915.11	43.6592	730.402	34.578	78.2609	13.9971
	V33	103324	2930.8	40.0459	678.784	36.7631	129.29	28.542				203245	2698.66	36.9113	725.96	38.2472	136.706	27.583				3040144	530.999	8.3237	93.5543	4.2371	293.117	33.4237				403255	1881.59	25.9495	265.746	12.8732	95.5522	15.9177				503317	2944.27	43.8752	702.404	32.8702	98.9806	22.8323
		103325	2649.38	36.6143	623.502	34.7324	144.202	34.1339				203246	2640.17	36.3396	705.222	36.9597	137.418	31.4649				3040145	1527.94	21.1903	329.822	15.7569	159.689	36.3632				403256	1580.75	22.392	211.357	9.7938	96.9426	14.3071				503318	3065.46	45.9381	719.977	33.4642	79.065	14.5526
		103326	3667.43	50.7176	997.123	55.2844	179.053	36.8078				203247	2897.12	39.9695	783.856	42.0951	176.32	31.4526				3040146	2053.2	28.8468	459.75	21.2312	230.499	26.4483				403257	1070.37	15.7242	170.062	7.9955	52.4434	7.637				503319	3275.41	49.2481	785.38	36.6915	75.0081	13.7306
		103327	4665.05	64.1162	1258.96	69.7667	283.414	53.1032				203248	3340.85	45.9385	908.175	47.6722	104.744	18.5583				3040147	2593.5	36.8277	523.685	24.1203	240.177	30.9873				403258	961.012	14.9018	247.416	11.5294	99.79	19.9218				503320	2423.21	36.5057	611.893	28.3134	112.16	25.5657
		103328	5269.15	71.9972	1384.03	77.4824	392.702	65.541				203249	3126.59	42.5059	755.067	39.158	125.059	19.6659				3040148	2993	42.0702	694.715	32.6266	292.281	28.0997				403259	635.169	10.3901	183.224	8.4444	42.8331	7.1822				503321	3146.43	46.7709	741.637	34.7775	87.426	16.6115
		103329	5305.17	69.168	791.369	43.7077	92.623	14.1052				203250	2579.78	35.2913	628.556	33.2439	53.9405	8.8509				3040149	1500.45	21.3416	286.86	12.9759	152.332	44.7095				403260	1070.1	15.8918	189.909	8.6369	66.514	11.5359				503322	3253.01	48.5479	751.666	35.3752	61.8019	11.7492
		103330	5066.95	65.2321	643.027	35.0254	64.6598	10.2277				203251	2355.39	32.3966	614.177	32.3986	88.8401	12.071				3040150	1763.06	25.3275	337.594	15.5084	190.458	21.5077				403261	908.681	14.1733	162.952	7.174	73.5276	13.8291		2007-08-29	W21	504001	918.107	13.9687	334.862	15.3612	101.362	17.6016
		103331	2567.8	35.7162	603.619	32.5823	156.723	45.8759				203252	804.618	12.0162	315.692	15.1562	264.857	84.0988				3040151	1316.48	19.3013	320.237	14.7443	89.3335	21.6014				403262	1136.51	17.0851	179.792	7.9731	107.25	17.719				504002	952.707	13.8266	241.622	11.0411	128.877	20.9935
		103332	619.661	9.1185	156.028	9.0148	82.4991	27.0281				203253	938.56	13.8581	368.647	18.2658	236.572	72.4737				3040152	624.037	9.9521	218.488	9.8803	183.812	36.3075				403263	1267.95	18.9577	263.491	12.1836	73.6524	13.2545				504003	637.596	9.1936	170.937	7.6086	96.5837	18.4775
		103333	6620.95	88.0145	1142.96	61.7605	136.354	23.2566				203254	1315.26	19.0932	460.161	22.9753	192.769	57.8595				3040153	2036.78	28.6687	458.706	21.6492	78.1831	18.8051				403264	640.067	10.01	139.212	6.1765	101.272	18.3334				504004	933.531	13.2602	213.173	9.4367	125.426	24.2091
		103334	671.464	9.9793	240.561	13.0664	113.269	32.5532				203255	1745.92	24.5901	447.154	21.9324	192.603	53.7625				3040154	3229.17	45.3868	531.312	24.3844	134.557	37.9326				403265	755.27	11.6295	184.267	8.3579	60.6737	11.3738				504005	475.798	7.0806	154.489	6.7532	119.484	21.3205
		103335	641.037	9.3329	179.931	9.9348	88.5156	25.7695				203256	1820.97	25.3775	480.559	24.507	193.768	52.5898				3040155	3642.82	51.232	706.486	32.9307	87.5356	23.4538				403266	751.088	11.5805	160.246	7.0656	83.5093	12.5574				504006	753.361	11.0795	238.707	11.0777	93.0604	16.557
		103336	853.564	12.258	210.154	11.7554	38.7765	11.2532				203257	2126.52	29.5546	512.675	26.248	195.361	51.5762				3040156	1180.48	16.9455	228.752	10.6701	305.03	33.2412				403267	463.537	7.4478	128.492	5.951	77.8878	12.7405				504007	1139.47	16.1889	277.835	12.6829	91.0938	15.8549
		103337	921.764	13.2502	200.024	10.6408	62.5277	15.0702				203258	2685.46	36.8264	585.831	29.1136	147.101	38.87				3040157	3546.55	49.7216	623.336	28.897	208.42	45.6635				403268	827.063	12.7448	170.947	7.8114	75.1881	12.5429				504008	973.074	14.1134	248.358	11.3277	63.9525	11.6318
		103338	416.498	6.6082	161.59	8.5006	99.47	31.7487				203259	2458.26	35.0349	772.634	38.321	177.982	44.7763				3040158	2882.26	39.9254	458.766	21.2252	151.249	32.3716				403269	757.992	11.5819	143.756	6.5518	81.2114	11.4767				504009	984.391	14.7372	306.719	14.9895	86.9439	17.1716
		103339	758.069	10.7191	191.655	10.6983	127.468	36.1914				203260	2387.24	33.5146	628.25	31.496	171.333	41.6187				3040159	3299.97	45.1575	458.946	21.1363	224.022	55.2533				403270	908.628	14.2128	192.275	8.6877	72.8983	12.4071				504010	275.259	4.4543	133.442	6.1417	72.0696	14.3676
		103340	1388.45	19.3604	264.512	14.4984	60.7472	16.7836				203261	2182.56	30.8936	604.459	29.6881	176.653	38.7309				3040160	2609.63	36.9179	470.774	21.6228	259.933	58.9242				403271	672.334	10.7134	158.886	7.1324	45.8581	7.3197				504011	461.238	7.1792	142.379	6.6048	111.88	17.4393
		103341	697.961	9.8335	174.373	9.488	96.4584	31.7355				203262	2604.89	36.8141	602.283	29.5132	161.617	38.3869				3040161	2174.48	30.6028	420.824	19.207	142.085	29.8606				403272	802.809	12.7826	218.861	10.1313	84.6929	13.818				504012	602.043	8.9124	188.265	8.8953	72.1796	10.949
		103342	1083.32	15.4604	208.727	10.8383	77.1788	20.8973				203263	2370.56	32.2633	497.176	26.2906	45.2316	10.6745				3040162	2273.44	31.3539	473.735	21.9571	71.9849	14.4557				403273	778.544	12.4557	202.078	9.2284	107.229	16.554				504013	541.958	8.1233	204.826	9.808	81.9104	12.6547
		103343	1500.8	21.174	365.383	19.4899	86.4215	25.1902				203264	2645.88	36.8078	656.948	33.0577	101.946	22.7133				3040163	2399.52	32.5295	394.14	18.0231	117.517	24.4274				403274	898.132	13.3097	192.619	8.982	55.439	8.8382				504014	821.944	12.22	216.607	10.1556	93.4055	12.3481
		103344	1432.52	19.6532	334.918	17.82	95.5881	31.9149				203265	2489.62	34.7898	661.597	33.4655	109.697	24.2152				3040164	2540.1	34.8183	490.018	22.782	88.3187	17.9738				403275	912.654	13.7587	203.125	9.3562	72.922	13.0313				504015	520.21	8.0551	216.976	10.2656	80.4431	10.5015
		103345	1674.5	23.1506	392.844	21.0008	144.246	48.4029				203266	2847.14	38.7784	618.934	31.4417	139.993	29.5277				3040165	2465.98	33.7803	466.562	21.5762	98.4792	17.0711				403276	1278.51	19.0059	248.59	11.5282	68.0757	11.0906				504016	384.604	6.0213	132.049	6.2383	50.7566	8.2003
		103346	2353.44	32.8539	600.018	32.5897	213.314	69.9329				203267	2568.55	35.9926	654.592	33.0082	150.635	30.4996				3040166	2502.39	34.5412	518.316	24.5851	85.1104	16.3744				403277	1225.69	18.4725	215.264	9.6887	71.9445	11.0767				504017	727.758	10.6124	197.586	9.2042	69.5127	9.2938
		103347	2449.01	33.5513	658.143	37.4358	156.306	41.6556				203268	2898.05	39.7228	706.456	36.2951	161.202	29.7496				3040167	1815	25.9512	448.871	21.2287	53.3158	10.4594				403278	1582	22.6506	284.912	13.0686	69.2951	10.4919				504018	500.361	7.4306	154.07	7.326	47.9291	5.7413
		103348	2116.8	28.5669	629.025	35.2142	189.973	42.4753				203269	2631.33	36.5932	726.191	36.8923	176.644	26.971				3040168	2207.7	30.362	450.486	21.2134	67.8513	14.4498				403279	1226.2	18.5588	270.002	12.6065	128.917	20.2054				504019	678.2	9.9812	197.926	9.0773	76.0869	9.8773
		103349	1137.69	16.2337	346.334	18.6372	149.101	28.0306				203270	3064.99	41.8069	699.482	35.8183	23.3764	2.3127				3040169	2191.46	30.8528	503.18	23.6639	87.0042	16.4653				403280	841.632	13.0308	180.064	8.1463	65.4837	10.42				504020	532.601	8.2491	223.092	10.5607	89.6152	12.1469
		103350	1398.45	20.34	325.635	17.1165	171.563	54.1828				203271	2721.42	37.9166	718.109	37.4601	13.3048	1.226				3040170	2151.98	30.4464	486.7	22.7311	40.7522	6.6099				403281	2230.29	33.106	518.887	24.6506	63.2576	6.5014				504021	897.128	13.7259	385.804	18.3345	81.3065	12.1445
		103351	2704.02	37.5668	623.546	33.6625	171.678	46.8947				203272	2790.41	38.5005	718.682	37.4642	47.7407	5.502				3040171	2002.52	29.8959	502.01	23.3741	19.2755	2.0836				403282	4649.07	64.9551	677.312	32.4376	146.716	16.8243				504022	714.811	10.7105	190.852	8.9296	83.2554	10.9265
		103352	2239.54	30.7439	480.651	26.5888	142.6	37.7274				203273	2430.62	34.8575	650.655	33.0746	6.4677	0.6155				3040172	2190.67	32.2211	479.836	22.2122	10.9503	1.2037				403283	3796.57	53.9954	575.482	27.005	172.62	21.1175				504023	662.301	10.2817	272.447	12.6825	70.4883	8.6407
		103353	2283.9	31.0828	465.41	25.5736	69.2642	18.4333				203274	3097.08	42.6272	749.78	38.7639	38.3095	4.2855				3040173	2044.21	30.6344	538.437	24.9855	12.244	1.3441				403284	3197.61	45.3934	422.225	19.7761	190.885	26.7952				504024	1155.63	16.6328	316.788	14.6424	45.9311	6.7946
		103354	1863.89	27.776	648.924	35.9141	83.2451	16.9095			V32	203275	2743.27	38.7668	856.268	43.0139	28.1468	3.9206			N23	3040174	3080.29	43.1399	519.915	24.3	143.831	28.2837				403285	3786.28	53.3213	432.153	20.0774	249.526	33.6682				504025	471.607	8.1672	271.857	12.5678	30.5625	3.6532
		103355	2510.17	34.4365	715.836	40.5708	229.726	53.424		4.6257	total dry weight	203276	3716.32	50.8804	944.601	47.4845	83.0081	12.5414				3040175	688.59	10.5285	160.058	7.8065	187.276	34.8559				403286	2504.36	34.8376	217.286	9.985	278.878	46.693				504026	1082.13	16.9605	438.435	20.4419	54.422	6.5985
		103356	1892.91	26.1817	327.981	17.0418	288.56	91.4373		1.4652	part1	203277	3189.09	43.7999	969.307	49.3443	43.5172	6.2438				3040176	1988.42	28.6917	396.927	18.6694	154.348	26.3575				403287	2367.85	32.3212	162.242	7.5869	292.974	45.2808				504027	1009.69	15.5277	291.364	13.442	34.8903	3.7537
		103357	1997.39	27.9145	401.073	21.2903	209.519	59.6108		3.1605	part2	203278	3669.34	50.534	1109.98	57.108	27.774	3.4399				3040177	2017.18	28.4404	309.517	14.159	100.706	16.9226				403288	125.753	1.9674	22.3238	0.9951	110.807	21.0808				504028	453.206	7.8587	277.908	12.8571	33.7915	3.9053
		103358	3002.22	42.1679	715.664	38.5182	239.108	67.7168				203279	3325.93	46.5743	1094.23	55.4623	47.7405	5.944				3040178	1846.33	26.9106	347.583	15.8942	135.703	23.9462				403289	2122.4	30.9572	408.578	19.3196	123.499	15.2354				504029	414.315	7.0894	279.602	13.161	47.4452	4.9671
		103359	3011.97	41.9588	821.054	45.7267	313.357	86.3472				203280	3419.87	47.7718	1051.32	53.4389	36.8435	4.3392				3040179	1621.9	23.6999	370.799	17.3991	141.838	24.8398				403290	3508.48	50.8687	747.96	35.3327	171.729	25.2114				504030	470.395	7.2085	164.91	7.626	40.2097	4.3306
		103360	3355.06	46.524	996.729	55.771	270.418	63.8355				203281	3354.5	47.9695	1095.77	54.5866	14.5935	1.7124				3040180	1122.09	16.3436	217.019	10.2938	131.69	26.3723				403291	3310.91	48.696	654.704	30.5797	224.083	34.9047				504031	680.953	10.451	229.379	10.3852	63.3649	10.1405
		103361	1868.17	25.7739	484.541	25.9183	286.156	56.1631				203282	3127.1	44.4125	999.673	50.1894	24.379	3.2319				3040181	1626.15	22.708	264.663	12.6594	113.044	24.6533				403292	2992.09	43.4362	466.583	21.6302	235.751	39.0373				504032	596.976	9.3786	214.463	9.9872	31.5769	3.1753
		103362	3230.06	44.1932	812.312	45.1275	220.98	55.3215				203283	3011.98	42.5955	927.06	46.4035	11.6354	1.3677				3040182	2026.41	29.3793	380.711	18.0644	413.255	75.4208				403293	1834.9	28.2241	356.764	16.1807	533.602	108.561				504033	759.642	11.7263	273.49	12.4808	37.52	5.8493
		103363	1891.41	26.542	527.277	28.532	147.189	35.2064				203284	1484.05	21.2738	490.812	24.4462	382.371	17.1332				3040183	770.816	11.9316	181.917	8.3833	366.015	72.3515				403294	263.819	4.2662	54.6077	2.3477	34.4525	7.2796				504034	1060.07	15.788	293.695	13.4797	36.6754	4.2945
		103364	3028.33	42.0586	719.869	39.2649	207.961	59.9694				203285	873.192	12.4304	265.807	13.3576	405.715	120.942				3040184	2177.27	30.5057	298.296	13.58	135.862	27.3645				403295	904.313	13.5613	146.7	6.7101	111.928	19.5187				504035	526.735	8.3191	206.922	9.6479	12.2508	1.341
		103365	3294.13	44.9977	885.146	51.4269	224.86	54.3086				203286	1195.28	16.6823	336.012	17.2758	312.88	93.5635				3040185	1917.91	27.0495	255.001	11.6518	493.86	92.517				403296	369.639	5.9633	91.5916	4.0712	35.0345	7.3454				504036	865.092	12.8318	237.727	10.8638	30.4005	3.3366
		103366	3102.38	42.5027	628.178	33.8802	315.724	93.9485				203287	1478.69	20.9712	492.685	24.965	401.755	106.748				3040186	1917.91	27.0495	255.001	11.6518	136.334	24.7654				403297	171.212	2.8105	51.3529	2.2744	28.667	5.5037				504037	794.129	12.8133	331.468	15.6556	41.0544	4.3073
		103367	2912.21	40.4691	606.808	31.8868	270.409	73.1525				203288	1061.93	15.125	321.438	16.1016	398.487	110.71				3040187	2097.49	29.4553	292.501	13.2698	129.337	25.2915				403298	1013.29	15.0397	162.46	7.4521	143.322	23.7345				504038	641.023	10.4402	245.563	11.5299	55.5726	6.1711
		103368	3386.31	46.6544	871.238	48.9185	229.827	46.5588				203289	1165.05	16.5733	369.07	18.701	386.888	58.2811				3040188	2026.6	29.8318	457.303	21.478	112.303	20.6937				403299	350.101	5.467	46.9255	2.0484	27.821	4.5389				504039	630.196	10.4003	286.081	13.1389	24.9691	2.4212
		103369	2017.44	27.6639	493.851	26.788	187.392	43.24				203290	1970.72	27.3568	518.685	26.4723	339.671	91.1482				3040189	2782.71	40.1099	589.235	27.5571	119.654	21.246				403300	1169.87	17.1384	182.966	8.3821	63.9945	7.1839				504040	677.583	11.6386	387.798	18.2873	18.8824	1.897
		103370	2495.51	34.212	496.247	26.5304	220.116	63.2534				203291	2113.09	30.4081	791.429	39.2971	352.64	77.3507				3040190	2265.41	33.705	532.933	24.3386	107.224	21.5288				403301	2722.06	39.2058	459.344	21.0031	101.467	13.9828				504041	815.964	12.8127	297.202	13.8957	15.2227	1.6823
		103371	1893.16	25.7833	316.229	16.6099	244.184	65.3898				203292	577.547	8.467	219.057	10.9331	137.171	38.7223				3040191	3380.83	51.6471	1617.92	80.0256	51.8735	11.1967				403302	2836.96	41.074	435.563	19.9476	135.395	21.6637				504042	352.824	6.1386	259.645	12.5157	14.0176	1.7149
		103372	2441.42	33.6114	625.401	34.8929	243.023	60.8442				203293	2591.35	35.8782	691.914	34.5004	156.826	40.2549				3040192	176.555	2.7738	40.8963	1.8237	108.342	15.071				403303	2449.73	34.4944	228.038	10.4816	316.572	60.748				504043	505.134	8.8997	305.153	14.3302	21.9921	2.2978
		103373	3017.24	41.411	650.322	35.5983	194.638	49.4631				203294	2594.33	36.2699	738.31	34.5998	149.683	21.1055				3040193	113.602	1.7154	28.3129	1.3559	13.1864	2.1387				403304	294.525	4.8213	87.7436	4.0735	27.8804	4.9977				504044	559.69	9.5613	286.882	13.3719	14.2656	1.4217
		103374	2976.14	40.6252	618.438	34.0317	156.016	39.961				203295	2497.47	34.7176	704.724	33.3423	124.125	18.6176				3040194	241.39	3.5633	41.6792	1.9317	22.1559	3.7947				403305	3501.39	49.3435	557.099	26.0656	94.389	10.0565				504045	717.503	12.0923	361.813	17.1359	17.8429	1.734
		103375	3338.9	45.9291	845.798	45.5219	246.587	52.6461				203296	2221.66	31.2439	604.314	29.247	236.684	74.6936				3040195	185.637	2.753	37.7238	1.7362	32.5568	5.0851				403306	4227.8	61.1219	725.123	33.6041	179.624	21.7039				504046	508.598	8.9996	342.46	16.2895	9.3244	0.9688
		103376	4241.66	59.1333	1289.23	70.7709	319.836	66.6514				203297	2525.88	35.3003	632.769	30.6938	244.208	71.2292				3040196	88.9803	1.4464	15.401	0.6486	13.8121	2.07				403307	3703.02	52.2131	456.353	20.9851	173.153	22.886				504047	528.621	8.9826	314.109	14.8087	15.356	1.5242
		103377	1806.85	24.938	302.556	16.0035	301.259	92.8542				203298	2735.76	37.775	628.51	30.3148	195.075	59.0451				3040197	334.52	4.9159	65.7139	3.0585	44.278	6.5402				403308	3332.89	47.3918	393.359	17.8038	200.725	28.5392				504048	653.681	11.2179	324.596	15.0801	7.901	0.7513
		103378	2551.91	35.1741	476.944	25.7175	239.138	69.7571				203299	2796.18	38.4295	702.587	34.6267	118.843	30.1773				3040198	189.943	2.8237	34.222	1.5317	28.3825	4.2217				403309	2872.17	40.9176	327.739	14.9462	254.502	38.7411				504049	630.484	10.6648	298.137	14.129	8.5181	0.8204
		103379	2348.98	34.7821	711.044	37.8925	296.798	79.8994				203300	3003.8	41.5557	902.225	45.5602	108.01	21.0454				3040199	201.598	2.9242	32.4823	1.5109	27.5175	4.5815				403310	2043.08	28.469	156.673	7.0942	325.802	57.0649				504050	448.262	7.6491	203.831	9.3489	1.8264	0.1711
		103380	3813.46	52.5082	961.752	52.9634	264.952	68.4252				203301	2244.68	31.764	730.625	36.9421	44.1529	8.5099				3040200	122.172	1.7567	17.1913	0.7582	22.1032	3.9486				403311	523.968	8.3894	113.781	5.2195	47.5575	8.2159				504051	1150.33	16.9416	329.657	15.2822	60.8506	10.1702
		103381	2812.71	39.4565	722.756	40.0888	159.301	40.1211				203302	2796.41	39.0702	817.592	40.6991	133.219	32.2257				3040201	326.179	4.8448	59.7083	2.7147	44.9529	6.4503				403312	444.762	6.8709	86.7651	3.9783	26.484	4.6472				504052	683.902	11.1661	357.606	16.4538	63.4141	9.382
		103382	1893.86	25.7265	460.576	24.7149	194.275	41.5896				203303	2264.68	32.0736	675.263	33.1705	161.757	43.2159				3040202	376.471	5.6204	60.8385	2.7556	50.6995	6.8329				403313	1521.61	22.378	246.083	11.5455	89.9202	15.2581				504053	573.012	9.3418	249.316	11.2712	38.1488	4.4096
		103383	3186.3	44.1466	896.344	48.9625	281.267	63.258				203304	2833.03	38.8609	802.54	40.9354	138.091	31.1547				3040203	215.734	3.2738	31.274	1.3678	24.5225	3.2861				403314	1581.61	22.5822	258.208	11.9961	60.316	10.9105				504054	608.023	9.4814	235.563	10.5893	63.5721	10.4705
		103384	3364.46	45.7484	782.529	43.4559	116.101	29.2057				203305	3094.59	42.5381	838.206	42.3515	105.467	19.2753				3040204	127.404	1.9377	12.8304	0.5409	23.5293	3.7797				403315	355.766	5.7041	75.5652	3.4393	29.3991	6.3491				504055	799.089	12.6167	294.394	14.2081	19.4091	1.9808
		103385	3759.01	51.6423	973.547	54.8556	215.917	49.6608				203306	2800.62	38.6628	807.005	40.5217	94.7198	21.3146				3040205	231.062	3.3376	44.6491	2.0588	32.6486	5.5409				403316	642.338	10.1587	139.279	6.2318	76.1407	12.6877				504056	779.062	11.9269	304.729	14.3652	47.4309	7.4954
		103386	907.813	13.1328	251.898	13.7849	115.552	28.4016				203307	2894.51	39.6333	785.883	39.7918	96.4755	18.9452				3040206	98.9705	1.545	19.4546	0.8499	16.2883	2.5375				403317	374.587	6.1203	86.0911	3.8542	31.8477	6.5754				504057	749.497	11.5432	303.33	14.0882	66.2983	10.743
		103387	1712.43	24.0573	446.558	24.0088	118.448	26.4509				203308	2759.18	38.396	701.161	35.0644	50.0374	9.5194				3040207	165.395	2.5053	34.6607	1.6105	27.4489	3.4765			N33	403318	996.078	14.3187	178.644	8.3961	143.52	24.81				504058	1130.22	15.743	152.495	6.8272	177.904	25.0862
		103388	4248.55	59.4919	1254.25	69.0794	154.61	25.5741				203309	2836.81	40.0673	860.326	43.352	69.9279	12.2923				3040208	188.498	2.9966	49.1611	2.2637	26.7199	3.6045		1.1678	total dry weight	403319	1430.8	20.5553	295.914	13.4382	163.8	31.6551				504059	710.546	10.5823	188.693	8.7576	57.4943	10.4958
		103389	4037.53	56.2971	1061.56	58.6794	50.4681	7.8656				203310	2809.57	39.3705	804.362	40.8583	64.2928	11.1668				3040209	324.368	4.951	73.2414	3.5048	7.0453	0.9134		0.3912	part1	403320	376.775	5.7031	101.96	4.6639	40.2406	7.9221				504060	1142.32	16.1522	222.826	9.994	104.971	17.1818
		103390	5189.67	70.6295	1246.12	69.3132	130.067	20.5836				203311	2727.24	38.8241	947.102	47.8552	84.7117	12.9957				3040210	365.677	5.6557	104.998	4.8076	33.7285	5.2979		0.7766	part2	403321	1730.89	25.1138	430.014	19.9597	126.501	18.2771				504061	696.33	11.2133	264.514	12.5377	7.7528	0.9838
		103391	4846.85	66.216	1211.68	67.3643	119.761	18.7816				203312	2964.56	41.3499	822.351	41.1977	131.546	20.9502				3040211	666.384	9.6442	129.015	5.9524	47.8824	7.3332				403322	1824.71	26.3084	460.571	21.1241	117.77	19.0129				504062	305.727	5.284	186.497	9.0315	4.3101	0.4041
		103392	3798.41	52.4686	935.179	50.8849	112.319	17.547				203313	3017.38	42.0539	914.515	46.2108	95.0903	14.9039				3040212	113.62	1.8123	26.4631	1.1846	14.8802	2.4115				403323	1204.72	17.5331	254.388	11.6821	135.845	24.1303				504063	747.439	11.9151	287.29	14.0416	9.3796	0.9012
		103393	3680.61	50.5887	850.818	46.3541	70.4378	10.9203				203314	2833.46	41.4565	948.255	46.9296	22.2579	2.8751				3040213	92.2711	1.4566	26.6903	1.2652	9.2317	1.3455				403324	664.421	9.476	95.2403	4.2901	179.343	40.0127				504064	804.245	12.4432	292.6	13.8454	10.1983	1.1157
		103394	3269.04	47.3175	1068.59	58.9287	144.743	26.693			V33	203315	3544	48.8386	809.747	42.5713	48.2984	7.3444				3040214	215.114	3.2532	37.3782	1.6424	24.5366	4.2981				403325	216.292	3.492	62.0931	2.7261	36.8244	6.2274				504065	491.705	7.8558	182.909	8.5993	15.9635	1.6662
		103395	3670.35	50.4502	798.453	43.7521	67.3686	12.4596		4.7814	total dry weight	203316	2052.72	30.0536	705.235	36.8154	42.3831	7.0801				3040215	121.15	1.8622	25.5461	1.2479	7.1069	1.0618				403326	1373.19	20.141	339.897	15.7521	99.1216	15.0217				504066	799.95	12.4835	305.125	14.5064	13.0431	1.3224
		103396	3556.94	48.5112	781.104	42.7139	128.436	24.8052		1.8121	part1	203317	3034.65	42.6202	778.493	40.8851	55.4805	7.3111				3040216	329.063	4.8079	59.7986	2.7378	23.943	4.1744				403327	1151.1	16.8372	213.911	9.6439	169.566	28.521				504067	970.97	14.0088	228.818	10.3797	112.534	22.5804
		103397	3601.57	49.9539	903.399	49.7515	60.5852	10.431		2.9693	part2	203318	2725.83	37.3953	652.262	34.7131	100.374	16.2052				3040217	40.8115	0.6177	9.2695	0.4348	3.3594	0.4066				403328	1073.13	16.3455	317.947	14.9468	104.182	16.7526				504068	1125.95	16.6215	271.669	12.3714	121.831	17.8597
		103398	3815.9	52.3856	913.051	50.3153	90.4405	15.6708				203319	667.759	9.9631	271.987	14.6142	119.626	32.3379				3040218	229.216	3.5779	59.1164	2.7306	12.037	1.6835				403329	567.102	8.7586	133.762	6.0072	140.544	24.0533				504069	1083.72	15.8609	345.174	16.3849	83.6424	16.8637
		103399	3692.16	50.2986	838.176	46.4233	82.8027	13.7806				203320	637.5	9.3178	203.437	11.1116	93.4835	25.5991				3040219	154.783	2.3481	25.1278	1.1645	16.993	2.2233				403330	221.866	3.6314	64.4535	2.7284	38.92	6.8783				504070	1159.96	16.8576	356.399	16.6754	124.587	25.4121
		103400	4695.71	64.6114	1133.43	62.1921	102.662	17.6988				203321	848.853	12.2381	237.608	13.1479	40.9528	11.1787				3040220	307.642	4.4286	38.9653	1.7305	43.4778	7.668				403331	886.335	13.5986	277.72	12.7447	99.2631	12.4881				504071	1170.42	16.9809	314.809	14.4112	99.1351	16.9801
		103401	4004.64	55.1366	942.431	51.2531	94.7438	16.8325				203322	916.678	13.2287	226.154	11.9013	66.0369	14.9705				3040221	44.644	0.6707	3.2897	0.1389	1.8617	0.2965				403332	1857.37	26.5842	466.472	21.9829	138.001	21.0393				504072	707.709	10.5012	223.435	10.0353	137.935	19.7339
		103402	4163.78	58.1393	1068.11	59.1494	66.7658	10.4279				203323	1380.79	19.3289	299.067	16.2158	64.1566	16.6726				3040222	45.3132	0.6782	5.4934	0.2399	6.1804	1.1185				403333	1081	15.9527	296.453	13.8073	94.7628	16.5266				504073	1231.37	17.6107	326.382	14.9349	98.3034	17.5715
		103403	3650.92	50.1004	760.735	42.0491	59.1116	9.512				203324	694.11	9.8175	197.152	10.6119	101.872	31.5257				3040223	230.926	3.3825	45.17	2.153	13.211	1.8891				403334	1558.87	22.1324	272.818	12.7002	169.243	31.2927				504074	1055.78	15.2824	346.952	16.2213	114.454	25.1307
		103404	4184.95	57.0521	911.113	49.7547	101.455	17.4909				203325	1077.34	15.4353	235.995	12.1221	81.5104	20.7591				3040224	121.91	1.7677	11.8471	0.5028	19.976	3.7513				403335	762.858	11.316	159.6	7.2093	180.358	39.074				504075	1063.52	15.0921	214.02	9.7038	101.505	15.1297
		103405	4468	61.7759	1132.1	62.7685	106.204	16.9647				203326	1492.52	21.1396	413.116	21.7985	91.2718	25.0237				3040225	1583.45	22.124	258.459	12.2255	71.6309	10.309				403336	290.638	4.6387	79.6947	3.4802	32.0273	5.8758				504076	1030.47	15.0214	281.146	12.5852	113.962	16.4505
		103406	3608.27	49.7489	799.09	43.3545	51.9242	7.9129				203327	1424.62	19.6213	378.671	19.9309	100.953	31.7038				3040226	1156.66	16.3074	187.708	8.8086	75.3168	11.0961				403337	2744.61	38.7169	693.76	33.2863	149.514	18.4644				504077	868.246	12.4736	294.92	14.329	60.3735	12.3255
		103407	3602.55	50.5029	830.204	45.3052	69.3156	13.3496				203328	1665.26	23.1129	444.164	23.4884	152.342	48.0828				3040227	1214.67	17.0527	176.416	8.3058	60.3684	9.1205				403338	2950.3	40.671	553.811	25.8388	133.754	18.8108				504078	1230.96	17.7885	319.226	13.864	109.296	18.7008
		103408	3625.4	49.3344	716.012	38.6503	70.0378	12.7583				203329	2340.45	32.8005	678.403	36.45	225.286	69.4704				3040228	656.857	9.2405	68.1164	3.0649	113.782	21.6936				403339	2073.07	29.4126	461.549	21.5696	109.612	15.0594				504079	1041.45	15.6849	423.787	20.0979	77.6538	14.9212
		103409	3314.3	45.7664	694.372	37.7101	74.5247	15.0675				203330	2765.56	39.6045	812.999	42.7789	38.5331	4.4868				3040229	1053.27	15.0908	189.295	8.7278	64.7014	8.7633				403340	1555.97	22.3725	365.213	17.076	77.2395	11.3377				504080	695.198	10.6751	211.534	9.3648	109.77	18.6002
		103410	3204.44	44.28	698.279	37.8605	34.7904	5.851				203331	2356.49	34.3665	695.942	35.8309	6.0657	12.5438				3040230	714.564	9.9747	82.1449	3.8493	49.7213	8.7459				403341	4150.74	56.9068	646.294	30.2154	235.254	34.4745				504081	835.441	12.9661	288.229	13.0863	66.8586	11.1684
		103411	3463.85	47.2003	663.937	36.2902	65.6419	12.5676				203332	2435.49	33.4967	744.121	41.8702	165.078	41.3801				3040231	885.105	12.6614	126.173	5.8843	86.6183	13.071				403342	4417.36	60.8444	661.745	30.8776	343.604	51.229				504082	853.196	12.6165	276.593	13.8339	41.0718	8.8627
		103412	2735.09	38.2609	602.123	32.562	55.2413	9.9843				203333	2105.12	28.5205	711.2	39.3854	200.635	42.1944				3040232	553.426	8.0249	48.2783	2.0865	100.006	19.2369				403343	2646.15	35.3724	217.959	9.7261	444.076	81.8943			W22	504083	1142.34	17.8955	278.776	12.9316	109.831	19.3064
		103413	3161.31	42.8823	634.675	34.9094	99.0392	21.5322				203334	1131.41	16.2073	391.578	20.8448	157.469	27.8453				3040233	715.088	10.5572	129.875	6.0009	33.8647	4.6375				403344	2157.87	30.3382	308.062	14.1368	233.603	42.9889				504084	1315.09	18.9636	248	11.6023	101.44	16.6047
		103414	2621.75	36.4141	511.766	27.3422	38.9126	7.6942				203335	1882.47	26.1392	370.827	19.0604	106.041	90.8326				3040234	671.499	9.7	90.7422	4.1127	65.5789	10.4836				403345	2673.51	36.8789	336.381	15.452	308.529	52.6227				504085	1362.58	21.4265	322.151	14.8378	93.6467	12.4631
		103415	652.831	8.9482	160.739	8.9355	273.183	79.2703				203336	1986.37	27.8691	453.468	23.8122	221.278	59.2166				3040235	1493.63	21.5667	280.987	13.0476	71.1424	11.1775				403346	2932.93	40.3686	431.643	20.2125	171.195	21.9443				504086	1611.65	23.099	273.012	12.4917	99.0545	15.2973
		103416	309.505	4.3998	80.8975	4.5049	207.314	58.6562				203337	2985.65	42.0994	809.157	43.0807	252.527	67.269				3040236	903.946	13.2205	128.497	5.7288	115.85	22.6874				403347	2375.83	33.1346	521.351	25.1064	238.974	44.1721				504087	1684.67	23.7468	263.3	12.0873	80.2714	15.4009
		103417	292.996	4.3169	93.3433	5.1387	188.311	50.9034				203338	2481.73	34.1564	561.076	29.673	232.47	62.8351				3040237	1057.62	14.9488	198.649	9.3254	58.4211	8.2317				403348	2627.7	36.94	676.931	32.7442	200.937	32.0207				504088	1625.08	23.8676	356.46	17.1377	51.1161	10.2914
		103418	352.966	5.0838	89.7612	4.831	217.908	63.2501				203339	1882.72	25.7414	357.54	18.5774	257.888	64.9574				3040238	1448.02	20.7523	243.265	11.3727	57.7431	9.067				403349	1792.9	24.7637	413.656	19.7165	188.618	33.5228				504089	1148.04	17.5191	266.901	12.2674	77.1482	11.4492
		103419	397.148	5.6451	113.009	6.2546	272.047	77.4389				203340	2427.95	33.5568	707.102	39.0261	256.663	60.4419				3040239	1208.1	17.0632	194.48	9.0908	51.8914	7.1211				403350	2147.02	31.4522	688.565	32.6549	325.676	54.8466				504090	1805.63	26.0668	342.081	15.8263	65.5138	9.1531
2007-08-22	V11	104001	857.154	12.8243	144.997	6.409	132.75	23.4827				203341	1932.9	28.1106	616.321	32.0059	27.9539	3.6289				3040240	1160.98	16.6841	148.897	6.6855	140.142	24.5256				403351	2919.28	40.9272	698.374	33.6492	348.845	63.6016				504091	1510.02	22.4838	287.509	13.1429	77.7289	11.0849
		104002	1000.45	14.4081	194.342	8.6121	130.788	23.3674				203342	1181.32	19.1519	570.844	29.0061	22.4999	3.056				3040241	2274.33	30.7289	252.916	11.7203	146.277	23.3176		2007-09-01	N11	404001	1333.1	20.3689	437.606	20.5677	40.1667	3.7902				504092	1429.76	22.446	386.7	18.4376	77.0446	9.6485
		104003	763.847	11.4193	139.639	6.0444	150.079	24.5746				203343	3000.59	41.3437	735.279	39.815	106.205	49.136				3040242	2614.46	35.3269	314.523	14.8469	133.397	18.4079				404002	1546.38	23.5126	547.296	25.0231	71.2215	8.6095				504093	1499.92	24.1102	455.664	21.5202	50.9872	5.1703
		104004	1128.1	15.9159	185.714	8.0555	207.099	37.1867				203344	1880.97	26.4988	596.159	31.9117	155.45	34.9736				3040243	2312.43	31.5215	320.095	15.0976	127.516	17.1155				404003	1939.39	28.8175	593.295	27.3809	56.0971	6.2425				504094	710.46	10.7799	161.223	7.7574	136.467	31.2677
		104005	93.987	1.4385	10.4666	0.4514	36.4721	7.3018				203345	3011.61	41.9903	813.911	43.916	219.632	59.5728				3040244	2236.53	30.8556	324.212	15.0038	126.765	18.6579				404004	1828.1	27.4905	547.677	25.3072	53.649	6.2037				504095	851.178	13.8205	234.865	11.1991	72.1123	13.8145
		104006	1185.97	17.0462	193.499	8.78	195.882	27.7907				203346	3275.95	44.9245	1000.78	57.5185	237.48	53.9494				3040245	2619	35.8885	338.472	15.7981	137.719	18.0576				404005	1744.96	26.9272	554.244	24.7853	71.7417	8.1853				504096	1294.35	18.83	243.128	11.1434	87.0134	15.8619
		104007	1138.39	16.443	200.506	9.0565	107.255	15.1012				203347	3085.26	42.4336	710.242	37.8934	234.087	93.3272				3040246	1883.05	25.4886	226.889	10.5012	91.7987	14.0807				404006	2081.96	31.5922	629.556	28.5694	60.3136	6.3832				504097	1088.09	16.2313	269.432	12.569	89.1776	13.3899
		104008	903.867	13.6703	172.171	7.2923	92.9256	13.9654				203348	2896.14	40.4033	686.08	35.6639	285.586	72.6688			N31	3040247	340.084	5.568	91.5048	3.9953	151.759	26.6623				404007	965.424	16.0114	459.943	21.33	9.2333	0.8351				504098	1378.04	21.2218	323.923	15.0037	87.496	13.4884
		104009	978.209	14.4408	186.688	8.5527	140.445	20.6193				203349	2959.72	40.5592	699.23	38.0628	164.773	39.6967				3040248	1100.76	16.3207	184.749	8.1964	120.151	30.1859				404008	3414.86	47.4081	549.34	25.2129	165.654	26.7959				504099	1053.39	15.5594	213.132	9.7048	94.4197	17.3466
		104010	1080.19	15.7105	148.724	6.1625	147.673	23.3264				203350	3320.47	45.8545	956.292	50.9141	260.427	52.2979				3040249	1133.32	16.8943	178.489	7.8378	143.951	34.5319				404009	3618.22	51.801	795.205	37.0962	162.969	22.6941				504100	1792.7	26.3329	385.244	18.0013	92.9561	17.3708
		104011	963.571	14.0438	163.256	7.2008	165.068	25.9089				203351	4218.25	59.0372	1457.65	79.1539	337.787	66.2106				3040250	856.352	12.6915	136.794	6.0531	165.842	31.6934				404010	3316.14	46.0107	598.322	28.0411	156.944	25.2049				504101	1605.06	24.108	391.779	18.3987	78.8401	12.9361
		104012	1037.69	14.8834	200.012	8.6544	90.2456	17.3839				203352	1796.88	24.8975	342.081	17.8992	318.167	92.2402				3040251	948.203	14.2166	193.014	8.6583	165.436	39.7253				404011	3356.68	47.3672	713.901	33.5156	130.848	18.959				504102	1186.77	18.1701	298.207	13.8348	58.3608	9.4132
		104013	787.941	11.6168	170.81	7.9664	123.341	17.5909				203353	902.803	13.1114	284.806	15.4177	122.038	28.2137				3040252	1629.21	23.9264	326.819	14.3857	133.104	27.7807				404012	2988.03	41.8077	658.546	31.2595	128.596	16.6105				504103	1654.7	24.1052	350.473	16.0719	98.0377	17.6532
		104014	774.594	11.422	146.002	6.3828	125.322	19.8577				203354	1702.98	24.0182	504.895	26.8527	125.096	26.276				3040253	833.691	12.9973	179.962	7.8961	134.816	29.372				404013	2160.3	30.9397	481.23	22.8792	72.1389	8.3765				504104	1187.97	18.47	327.793	15.1637	71.1015	12.2577
		104015	580.622	9.0576	99.3393	4.2559	116.573	17.1025				203355	4225.1	59.3952	1418.11	77.2621	163.288	25.405				3040254	1206.16	17.7094	212.422	9.4257	125.759	26.0593				404014	2584.95	36.8977	688.341	32.6917	75.8459	9.4887				504105	1818.52	26.9965	389.853	18.2455	57.1481	8.6454
		104016	551.963	8.1481	110.338	4.7816	92.2578	18.6826				203356	1874.04	26.8813	684.474	36.4069	87.1442	13.9751				3040255	1528.47	22.2007	298.589	13.3656	114.939	19.4196				404015	2438.86	34.8392	486.026	22.3998	193.137	34.0475				504106	1075.79	16.231	171.673	7.8836	76.5592	9.0354
		104017	1053.11	15.461	182.602	8.0173	133.426	17.0981				203357	2458.37	34.68	750.126	39.2589	57.1608	8.9121				3040256	1385.94	20.3822	271.812	12.0027	133.512	21.9565				404016	2981.06	43.0353	775.239	36.3783	124.285	17.5321				504107	1303.38	19.6015	236.133	11.0185	55.7829	5.966
		104018	1097.75	16.4724	256.657	11.6799	136.32	21.1068				203358	2016.2	56.2056	1200.24	65.6301	53.3006	7.8136				3040257	1117.22	17.3904	274.26	12.2739	121.906	19.1574				404017	3308.25	47.4708	737.723	35.0518	161.387	24.104				504108	1956.79	29.6447	381.576	17.8589	56.8427	6.1329
		104019	834.797	12.3015	155.04	6.6308	122.546	23.5304				203359	1883.41	25.6847	520.744	27.6424	205.178	41.3145				3040258	996.315	15.7642	258.793	11.668	125.296	17.8381				404018	3137.51	45.4684	684.591	31.6208	158.697	23.2253				504109	1910.38	27.5017	283.471	13.4254	84.981	8.9732
		104020	938.854	13.6761	185.209	7.8817	138.256	26.5966				203360	3168.72	44.0749	1013.44	54.7622	297.053	62.8397				3040259	1497.68	22.1083	303.459	13.9437	112.241	18.5868				404019	4052.05	58.2054	1027.31	48.7159	184.817	25.0814				504110	1496.1	22.2105	267.235	12.4112	73.5408	10.4613
		104021	1250.7	17.6867	136.925	6.171	189.434	27.2339				203361	3345.89	45.674	884.757	48.6034	122.617	29.0126				3040260	875.059	14.338	305.332	14.2767	74.1876	11.8442				404020	2247.08	31.2074	304.674	14.0533	285.473	53.0491				504111	1512.46	23.246	379.863	17.576	43.2282	6.2142
		104022	1244.91	17.54	160.772	7.0097	101.76	14.2876				203362	5161.03	70.5147	1408.91	77.5236	137.367	20.4475				3040261	140.996	2.1681	28.0058	1.2715	13.9927	2.024				404021	2663.89	38.3496	575.952	27.067	243.959	41.5992				504112	2183.2	31.6646	402.478	18.6324	86.5245	12.1481
		104023	815.062	12.2281	130.717	5.737	106.206	13.5482				203363	4820.1	66.1084	1369.97	75.3438	126.482	18.6574				3040262	137.213	2.0935	22.5598	1.0265	17.5741	2.601				404022	2966.61	42.3266	592.925	27.9073	241.29	39.6937				504113	1865.84	27.1566	343.714	15.963	62.4826	9.5153
		104024	857.828	12.909	151.5	6.7196	104.11	12.4906				203364	3777.45	52.3833	1057.35	56.9124	118.623	17.431				3040263	77.3979	1.1581	6.4869	0.288	11.2657	1.8987				404023	3328.02	48.0048	654.444	30.3767	310.266	51.308				504114	2158.09	31.9408	492.108	23.3358	110.581	21.2168
		104025	509.024	7.8435	107.433	4.5559	90.2814	12.6761				203365	3660.3	50.5065	961.967	51.8449	74.3911	10.8481				3040264	196.383	2.8089	27.6793	1.2512	41.3271	7.5491				404024	1656.74	23.8269	320.848	14.7374	221.37	43.4691				504115	2469.68	36.0771	524.264	24.6816	132.32	18.7964
		104026	1072.41	15.8068	264.711	11.6515	86.5483	12.6479				203366	3251	47.2406	1208.19	65.909	152.867	26.5164				3040265	143.532	2.1536	33.5954	1.565	11.0563	1.5061				404025	2422.99	34.7811	458.662	21.1245	250.008	46.071				504116	2553.84	36.6906	540.77	25.7844	90.5154	14.339
		104027	1593.59	22.7703	427.723	20.6261	126.783	14.2925				203367	3650.1	50.3682	902.762	48.9346	71.1495	12.3772				3040266	173.034	2.6412	34.3906	1.5712	28.8878	4.6448				404026	2734.28	40.0128	740.997	35.0236	308.755	58.7281				504117	1454.08	21.2225	285.588	13.255	75.6636	13.0729
		104028	2558.76	35.9269	522.211	24.4841	156.123	18.787				203368	3537.31	48.4323	883.145	47.7735	135.645	24.6412				3040267	70.4801	1.034	5.8056	0.2606	33.6653	6.3158				404027	2498.14	36.7235	637.107	29.6518	190.138	33.1648				504118	1584.58	24.3098	361.272	16.8157	94.7977	13.4927
		104029	1477.18	21.2688	252.519	11.6494	175.335	21.8269				203369	3393.49	46.531	979.874	55.0323	172.019	39.0115				3040268	100.935	1.5608	19.2803	0.8798	3.0728	0.3348			N12	404028	2398	35.4893	460.75	21.4181	180.054	36.0968				504119	1933.99	28.0865	377.192	17.7269	67.6546	9.8284
		104030	2163.29	30.1179	354.545	16.7119	185.913	26.6732				203370	4297.3	58.0354	1114.14	62.014	153.775	27.278				3040269	436.018	6.4026	103.574	4.7013	43.189	6.1369				404029	4079.23	59.6547	842.994	40.8244	402.222	67.5927				504120	1834.96	26.7138	373.019	17.7444	86.6431	15.8946
		104031	1988.05	27.3355	351.669	16.255	199.652	29.2056				203371	3652.82	49.7231	936.541	52.2445	130.425	22.1369				3040270	92.7111	1.4177	14.1944	0.6082	10.8618	1.2289				404030	1709.62	25.6768	361.884	16.8316	137.053	22.5482				504121	1447.06	21.3716	259.812	12.228	74.3816	13.0966
		104032	1048.62	15.2066	163.642	7.0022	98.8488	15.8077		2009-09-01	V11	204001	2170.81	31.5572	544.796	23.4227	135.496	18.7221				3040271	132.738	1.9635	18.5675	0.84	24.2111	4.707				404031	3483.73	51.6652	759.474	36.2584	199.944	29.3621				504122	1265.35	18.3388	197.543	8.9568	72.802	10.3096
		104033	938.909	13.3182	129.988	5.4813	136.517	22.5246		1.7632	total dry weight	204002	1853.63	26.8294	447.803	18.8588	130.753	20.8638				3040272	172.565	2.5881	30.2479	1.385	7.4679	0.9775				404032	2670.6	39.5781	562.81	26.579	173.206	28.9692				504123	1397.18	20.8359	262.037	11.9479	66.6003	10.9922
		104034	1098.69	15.7993	231.115	10.1849	103.011	18.73		0.5641	part1	204003	1528.06	22.4492	449.725	19.2128	98.3132	12.4328				3040273	143.876	2.1179	25.8445	1.1275	10.0876	1.4872				404033	2552.54	37.6659	516.442	24.45	128.447	18.4055				504124	1055.44	16.1565	234.216	10.8447	51.8126	8.7517
		104035	2433	34.3494	571.009	26.6782	114.426	15.4364		1.1991	part2	204004	1680.55	24.5604	420.07	18.0162	118.02	16.528				3040274	130.591	2.0181	20.6369	0.8854	28.6944	4.9442				404034	2700.99	40.2347	601.754	28.5026	128.985	17.8144				504125	1468.59	21.6161	275.275	12.9117	68.7405	10.3635
		104036	1212.48	18.579	407.9	19.1371	80.6751	9.38				204005	1281.2	19.028	355.084	15.1117	108.963	18.4413				3040275	224.036	3.2846	27.2565	1.1718	74.0683	14.4468				404035	1752.37	27.2372	538.665	24.9589	63.4245	8.9913				504126	1866.69	27.1712	328.566	15.267	75.4973	10.499
		104037	2177.59	31.1062	443.517	20.7628	169.649	23.7511				204006	2156.49	30.9197	486.087	20.5453	95.3551	14.6419				3040276	425.125	6.1428	92.3432	4.3367	52.2849	8.8035				404036	2818.92	41.5824	474.919	22.1557	223.022	42.2094				504127	1566.52	23.3298	298.337	14.0972	75.3028	10.2643
		104038	1650.35	23.8121	350.498	16.3899	179.539	29.0988				204007	1453.52	21.2551	307.729	12.6238	150.656	27.7388				3040277	629.206	9.0578	113.069	5.3676	60.311	8.9375				404037	2030.94	30.2144	418.324	19.4201	136.024	22.6782				504128	1679.8	24.7405	325.254	15.2382	57.2454	9.7333
		104039	1329.92	19.2845	282.332	13.6024	164.147	21.383				204008	1901.8	27.3444	374.834	15.7312	141.445	22.1676				3040278	343.788	5.0289	54.5396	2.5183	15.1474	2.9819				404038	1535.8	23.6567	398.099	18.1653	84.478	14.6574				504129	1253.51	18.9779	252.524	11.3469	68.2213	9.9527
		104040	1717.11	24.2859	383.367	17.9227	127.166	17.8014				204009	1911.95	27.1652	385.227	16.3847	160.665	24.5638				3040279	68.2274	1.0608	13.0366	0.5579	18.2186	3.3285				404039	329.081	5.5497	96.8928	4.2678	15.6136	2.2275				504130	1388.76	21.6024	399.475	18.8833	88.0513	13.5304
		104041	2020.04	27.8832	351.785	16.7038	161.754	26.2806				204010	1802.68	26.2128	505.437	21.8437	151.001	21.2943				3040280	68.5486	1.0078	13.7407	0.6087	8.6771	1.3954				404040	3534.34	51.702	787.505	37.0799	49.7488	5.03				504131	822.571	13.4385	258.867	12.4174	64.1725	12.8719
		104042	2416.61	33.9523	429.234	19.8841	212.971	30.8977				204011	1853.37	26.6418	303.766	12.5649	243.974	33.1299				3040281	88.0727	1.3548	13.7358	0.633	12.3954	2.5265				404041	3961.25	57.1523	758.212	35.4946	73.7598	8.3249				504132	705.046	10.5542	148.241	6.8877	72.7196	11.6156
		104043	2119.46	29.5282	385.893	17.4137	222.395	40.4965				204012	1375.42	20.1882	266.367	11.0201	212.245	32.5356				3040282	204.264	2.9095	27.0634	1.1917	16.787	3.2896				404042	5154.63	74.7133	954.577	44.5666	129.08	15.7312				504133	1054.02	14.8132	175.946	7.9752	77.7666	13.0452
		104044	907.194	13.966	188.514	8.7236	108.815	13.8151				204013	1938.28	28.1193	452.396	19.2146	184.319	25.3567				3040283	68.8839	1.0278	15.9542	0.7104	23.0701	3.8049				404043	4956.11	71.7394	885.861	41.1544	141.543	18.839				504134	1511.04	21.1475	281.573	13.1564	41.4196	8.1048
		104045	1518.69	21.5608	288.436	13.0699	107.164	17.0994				204014	1825.96	26.4375	415.283	17.4926	170.243	19.0687				3040284	281.396	4.0048	38.4749	1.787	28.6426	5.4492				404044	3728.09	54.8212	640.246	29.2812	151.359	21.314				504135	828.181	12.1296	185.766	8.7028	83.6073	13.2134
		104046	1183.39	17.543	214.813	9.4218	130.312	20.2802				204015	2067.28	29.4168	495.418	21.0504	159.618	19.5375				3040285	183.779	2.7309	36.1106	1.7304	24.7888	6.0971				404045	2851.56	41.2009	359.335	16.498	222.684	35.1661				504136	776.548	11.3	182.203	8.552	96.5012	17.1272
		104047	1595.05	22.4072	240.208	10.4624	163.6	25.018				204016	1505.78	21.7318	361.931	15.6175	217.714	30.0381				3040286	126.259	1.9238	23.1344	0.9749	29.111	5.2278				404046	2044.2	28.6654	207.168	9.6545	165.828	26.0782				504137	714.659	10.8585	190.387	9.0027	87.842	16.4673
		104048	1083.56	16.0296	227.817	10.2462	97.9742	18.4521				204017	2712.66	37.1647	518.955	25.2922	145.728	27.4176				3040287	34.9216	0.5335	6.7228	0.3203	14.1416	2.9812				404047	1394.89	21.6529	270.827	12.0469	138.92	23.2018				504138	679.07	11.2869	249.375	11.7947	59.9691	9.837
		104049	1705.51	24.9153	368.164	16.8731	78.8	10.9032				204018	2965.43	40.3696	578.018	27.2571	166.166	36.1629				3040288	181.068	2.601	36.9895	1.6593	49.1237	9.5393				404048	104.339	1.689	17.103	0.7974	18.5858	2.8338				504139	491.722	8.4338	182.446	8.5108	79.2829	11.3761
		104050	1712.01	24.4807	323.325	14.0681	96.7716	16.6637				204019	1873.75	25.7979	364.493	17.2693	122.248	23.9408				3040289	55.4252	0.8202	13.239	0.59	22.3885	4.2104				404049	882.792	14.2988	278.595	12.5151	53.7354	6.9776				504140	752.363	12.7715	310.384	14.7577	86.0654	12.6532
		104051	1934.55	27.2833	366.038	16.6689	70.6011	10.9091				204020	1410.42	19.8796	333.014	16.3468	134.9	24.787				3040290	141.066	2.0907	32.8186	1.464	19.6016	3.344				404050	1953.57	28.8844	369.612	17.0362	72.537	10.9543				504141	1153.35	18.2081	329.569	15.7877	42.0321	6.6034
		104052	946.356	13.718	159.347	6.8931	100.773	17.1776				204021	2448.31	33.9422	482.308	23.3442	113.02	21.4239				3040291	42.393	0.6304	4.4371	0.18	8.3833	1.4029				404051	2002.04	30.3101	343.513	15.4636	213.424	41.4293				504142	1409.73	21.1861	320.227	15.5026	56.212	9.6635
		104053	834.499	11.9872	150.251	6.4592	116.716	20.975				204022	3267.2	44.4523	541.776	26.4832	165.532	34.4695				3040292	365.341	5.2657	62.1192	2.8783	24.4547	3.7037				404052	1885.03	28.406	398.721	17.7711	95.7344	12.8185				504143	186.221	3.291	96.3716	4.5072	100.664	19.9572
		104054	478.627	7.1754	75.2846	3.2393	107.379	17.861				204023	3335.97	45.5118	602.837	29.2319	148.629	24.9374				3040293	295.197	4.2666	56.9483	2.6466	54.1524	8.704				404053	2728.58	39.215	344.491	16.0032	227.292	44.2892				504144	447.296	7.3012	144.977	6.6884	127.93	25.5276
		104055	908.745	13.3668	154.102	6.5319	121.084	20.5739				204024	3301.28	44.9142	609.439	29.5013	212.94	44.561				3040294	275.12	4.0031	57.4626	2.6877	57.2062	9.1325				404054	1576.1	23.9877	392.765	17.9103	44.4688	4.8522				504145	347.552	6.057	146.175	6.7008	132.041	24.4421
		104056	621.231	9.557	139.238	6.0998	67.529	11.5991				204025	2902.37	40.5625	588.12	28.3973	214.522	43.6511				3040295	61.5114	0.9863	12.9267	0.5961	16.4979	1.7112				404055	2755.73	39.3416	412.213	18.8994	74.563	9.1287				504146	646.457	10.0179	177.345	8.2447	96.3526	16.7521
		104057	772.706	11.7994	209.691	9.6272	70.4397	8.7403				204026	2474.44	34.3163	542.181	26.5186	239.707	53.9415				3040296	123.848	1.8215	16.6141	0.7003	91.3029	18.8036				404056	3820.64	55.5382	714.463	32.9467	109.833	14.7799				504147	1024.37	14.6649	220.895	10.5442	79.9445	17.5885
		104058	1665.63	23.7786	293.113	13.3313	150.662	18.51				204027	2382.43	32.8303	447.068	21.2247	190.365	46.3714				3040297	74.9069	1.1612	12.4037	0.5564	23.2575	3.847				404057	3629.14	52.4922	597.25	27.4819	125.946	18.2407				504148	860.74	13.4248	233.256	11.3027	38.7444	6.7569
		104059	1483.82	21.4349	253.338	11.7672	118.691	15.2258				204028	2169.72	30.2014	414.26	19.9745	148.494	28.6638				3040298	815.05	11.8855	168.683	7.6259	98.4708	15.6454				404058	2568.12	37.1568	360.535	16.5752	136.484	21.8703				504149	1383.14	20.7723	372.439	18.0658	69.5844	11.1338
		104060	1412.29	20.3323	245.475	10.9407	135.529	19.0978				204029	2525.26	34.9571	517.145	25.1666	270.787	65.4388				3040299	228.846	3.4464	33.6156	1.4525	70.736	14.401			N13	404059	1471.17	20.0336	234.321	10.5587	278.928	58.1439				504150	901.24	14.775	287.175	13.4708	7.0109	0.7138
		104061	998.736	14.8631	199.703	8.8077	141.516	26.5726				204030	2489.52	34.2596	482.66	23.6356	209.232	45.1876				3040300	536.055	7.7772	124.055	5.7523	43.5617	6.7364				404060	863.825	12.3509	301.779	14.1601	24.0847	4.2429				504151	653.34	10.9512	198.481	9.1458	0.8372	0.0895
		104062	1032.25	15.3521	167.616	7.3114	121.037	16.739				204031	938.702	14.3656	304.486	12.7898	135.118	23.0097				3040301	527.811	7.7749	118.936	5.4322	36.5088	5.0877				404061	2839.16	39.7686	806.281	38.4131	121.28	13.0682				504152	452.204	7.6984	223.463	10.4631	5.4081	0.5001
		104063	1254.84	18.5193	201.98	8.9525	110.684	14.9322				204032	2056.24	29.4453	472.848	20.3746	173.714	22.2025				3040302	411.483	5.9116	76.7442	3.4713	60.5827	9.3335				404062	2839.68	40.3339	996.559	46.234	136.781	16.9748				504153	355.84	5.8187	126.58	5.8087	2.7341	0.3109
		104064	1205.53	17.807	238.992	10.514	104.722	13.6287			V12	204033	1845.16	26.0906	365.681	16.2877	176.938	43.3148				3040303	313.676	4.6055	50.546	2.2351	97.143	17.8797				404063	4675.82	65.7006	1429.09	66.8493	232.072	30.9139				504154	251.619	4.1113	117.765	5.6521	114.943	22.8753
		104065	1198.85	17.1058	155.595	7.4052	138.199	18.2829		1.8025	total dry weight	204034	2267.4	31.8487	465.318	21.6842	212.314	36.5222				3040304	1112.66	16.1607	258.548	11.9137	96.9039	12.9681				404064	4967.07	69.8368	1320.31	61.524	301.35	42.7366				504155	1081.25	16.1683	342.751	16.2509	127.123	24.3617
		104066	1465.54	21.2673	260.612	12.1872	130.737	15.7349		0.5471	part1	204035	3088.37	42.9859	560.068	25.4421	226.253	38.2821				3040305	118.081	1.7703	14.7137	0.6336	16.9273	1.9996				404065	4921.29	68.9803	1156.8	53.7373	332.75	51.2518				504156	85.6072	1.4729	47.7128	2.1338	115.104	23.8701
		104067	1167.48	16.8986	175.108	7.6358	181.81	28.7499		1.2554	part2	204036	2292.52	32.5933	512.094	23.5674	195.344	39.0341				3040306	402.732	5.8833	81.5714	3.7651	67.7052	11.5402				404066	3466.91	49.92	903.606	40.9974	354.827	56.5525				504157	876.355	12.3799	168.64	7.7293	103.725	16.5816
		104068	1283.14	18.536	205.711	9.1793	138.076	19.2105				204037	2084.54	29.2451	401.138	18.1613	218.865	52.0844				3040307	152.744	2.2985	23.7773	1.0249	68.4044	14.6124				404067	3312.68	44.1487	438.004	20.3552	457.464	83.6722				504158	918.641	13.3391	200.826	9.0046	90.8414	13.8766
		104069	1414.25	20.3217	224.993	10.147	131.345	17.5497				204038	3593.78	51.3189	1031.3	49.3748	429.07	60.9665				3040308	166.435	2.4254	28.5873	1.3036	40.3173	6.4623				404068	2892.67	38.9453	406.356	18.8915	464.749	80.6436				504159	882.78	12.4201	142.992	6.6168	82.9997	11.4066
		104070	1357.05	18.9052	229.229	11.5007	146.498	14.7976				204039	1928.61	26.8326	372.144	17.1069	182.006	45.4264				3040309	99.6088	1.503	21.688	1.053	26.4736	4.0556				404069	4056.69	56.4441	1238.1	57.9087	154.893	23.0079				504160	1004.57	14.622	280.032	12.8935	93.8062	18.8304
		104071	985.775	14.9244	256.116	11.5418	166.262	25.2428				204040	1899.7	26.1405	322.558	15.0743	126.413	29.5487				3040310	51.9537	0.7809	9.7352	0.4644	8.978	1.7283				404070	2831.8	39.892	891.334	41.8444	86.298	10.9131				504161	1550.18	21.561	298.74	13.3445	79.38	12.1969
		104072	877.481	13.0977	223.56	10.1759	128.053	18.2439				204041	1984.41	27.4423	357.413	16.3528	117.366	23.6964				3040311	46.6749	0.7312	7.6634	0.3238	20.2017	2.5272				404071	491.161	7.5235	184.94	8.5132	32.0845	6.6923				504162	873.51	12.516	167.028	7.4626	51.8173	8.7501
		104073	533.588	8.1971	152.297	6.6309	87.5158	14.2626				204042	1956.25	27.2584	355.743	16.6242	158.96	34.7175				3040312	131.728	1.9374	19.3489	0.9208	32.5729	5.6586				404072	3888.41	53.6374	1040.84	49.1139	123.063	14.1599				504163	1372.05	20.1325	302.472	13.8136	64.5399	8.0986
		104074	3019.34	42.9107	796.145	37.7859	179.407	18.2991				204043	1699.96	25.6801	514.294	21.3531	40.4813	4.3308				3040313	65.323	0.9889	6.2676	0.2675	24.6959	3.9531				404073	5528.4	76.5372	1464.04	69.4698	206.23	26.8066				504164	1304.22	18.7243	267.572	12.1751	41.6771	6.0022
		104075	1735.89	24.9283	421.866	19.5719	87.5624	9.2801				204044	1550.53	23.0541	346.27	13.9294	121.249	19.9237				3040314	289.569	4.2181	58.8293	2.6191	96.212	16.2396				404074	5604.86	77.206	1270.22	60.3868	273.058	38.6353				504165	860.637	12.4007	182.648	8.3823	25.7554	4.5177
		104076	1958.37	27.5372	399.976	18.8944	150.07	18.2842				204045	1207.22	18.0061	284.133	11.6541	93.6007	11.6083				3040315	28.8506	0.4877	8.9759	0.4002	15.9616	2.3819				404075	3946.11	56.0668	1111.9	51.5543	351.235	53.1491				504166	845.091	12.3075	184.609	8.5141	44.8899	6.6029
		104077	2955.51	42.7913	813.932	38.3359	173.501	19.0048				204046	1658.47	24.5269	447.294	18.4124	85.7324	9.9216				3040316	12.2717	0.1878	1.4262	0.0602	4.594	0.8823				404076	2668.4	35.1961	391.01	18.6491	264.448	43.6302				504167	1132.73	16.3578	229.884	10.4524	51.3627	6.3796
		104078	2611.94	36.3787	668.431	31.6663	204.373	21.8299				204047	1565.05	23.047	369.411	15.0226	130.543	21.1066				3040317	182.973	2.6254	36.6233	1.6428	20.1209	2.7564				404077	1608.67	22.5522	313.886	14.5959	226.439	39.6825				504168	959.287	13.6332	193.131	8.8828	26.7255	4.6079
		104079	2865.41	40.5805	785.283	37.3294	235.485	27.8552				204048	1679.81	24.6201	376.356	15.4453	101.539	14.7172				3040318	87.9104	1.3123	12.5271	0.5485	9.3187	1.3768				404078	2215.23	31.8228	690.94	31.9672	111.251	15.0771				504169	1224.9	17.5342	225.474	10.5468	26.5789	4.1466
		104080	1559.54	22.5042	340.504	15.5966	146.882	37.236				204049	1511.1	22.3975	391.246	16.3752	97.145	13.6196				3040319	103.471	1.5374	20.9463	0.9821	27.9391	4.0336				404079	2194.92	30.115	437.562	20.3301	221.153	44.8587				504170	912.368	13.876	284.099	12.9993	60.9396	8.3395
		104081	1858.45	25.3752	304.442	14.1919	159.574	46.8749				204050	1598.35	23.2296	320.207	12.957	80.9575	10.9276				3040320	229.328	3.2265	38.4135	1.9055	44.9689	7.3036				404080	2541.77	35.7839	642.043	29.4931	216.462	38.7838				504171	1101.22	15.3913	279.589	12.7675	72.7205	14.9974
		104082	2292.13	31.2367	422.214	20.0105	162.814	41.96				204051	1051.98	16.0595	276.031	11.1151	127.707	21.6011				3040321	147.9	2.2646	38.0887	1.7906	16.116	2.441				404081	2600.31	37.1347	627.075	28.7367	303.1	53.5552				504172	1017.06	14.8571	252.178	11.5012	90.011	14.828
		104083	2801.56	37.829	524.057	25.3786	167.824	35.2203				204052	2092.78	30.5005	468.376	19.1252	164.532	24.6165				3040322	134.293	1.9558	23.7198	1.1171	30.8373	5.0967			N21	404082	2371.21	34.2724	685.953	31.6634	158.279	19.4482				504173	758.08	10.8341	173.899	7.8202	30.5358	5.5047
		104084	2957.42	39.9962	530.988	26.064	225.145	48.2721				204053	1668.04	24.6307	454.545	18.958	98.4822	12.2234				3040323	233.891	3.3554	28.4039	1.303	39.0662	5.4182				404083	3369.15	49.3115	918.885	41.9396	277.965	42.5146				504174	802.406	11.5578	163.294	7.5116	30.753	5.5502
		104085	2224.46	30.7551	388.211	18.3232	141.883	33.2226				204054	1666.33	24.3659	370.782	15.3642	91.93	11.3423				3040324	2556.08	36.0691	345.232	15.6185	291.201	49.5149				404084	3011.79	43.8883	692.769	31.2263	266.362	53.2551				504175	1054.92	15.3501	236.223	10.7304	78.119	11.1183
		104086	3076.36	42.0743	561.964	26.7636	170.213	38.4972				204055	2934.62	41.0734	641.652	30.1672	229.329	35.8185				3040325	3093.09	43.0948	402.692	18.6119	305.404	50.4697				404085	3136.69	44.0585	764.534	36.0153	206.372	33.7229				504176	943.26	13.6334	236.084	10.8532	75.614	11.728
		104087	2987.84	41.0763	521.292	24.5459	218.989	44.5973				204056	2129.99	29.6232	465.331	22.911	242.077	51.2452				3040326	3283.62	45.9027	492.337	22.6337	238.77	38.782				404086	2971.18	42.6618	780.872	36.7788	187.938	26.9247				504177	726.247	10.6318	179.487	8.2259	77.926	13.2055
		104088	2312.31	32.1664	443.989	21.6444	159.039	38.9				204057	1742.65	24.0527	378.15	18.4571	109.664	19.6689				3040327	2722.44	38.014	376.715	17.4948	303.415	51.9743				404087	2917.6	41.3797	617.696	28.8305	297.544	54.0675				504178	672.612	9.7416	171.21	7.8457	55.0894	8.9887
		104089	2249.3	31.0634	391.947	18.195	202.256	53.0973				204058	1897.34	26.0308	360.448	17.612	94.7748	17.9587				3040328	3139.4	44.1126	446.875	20.473	275.51	47.2009				404088	2414.15	34.5159	653.583	30.8313	197.299	28.1637				504179	749.033	10.8386	137.238	6.2058	69.4929	13.2011
		104090	2478.13	33.8881	399.069	18.529	167.72	41.3065				204059	1769.34	24.1425	367.635	18.217	103.538	19.1117				3040329	4052.9	56.8925	583.184	26.9361	315.495	46.5951				404089	2209.63	30.9495	423.031	19.7181	261.841	50.795				504180	1101.91	16.0006	241.827	11.062	79.4968	12.1338
	V12	104091	2355.71	33.28	359.159	15.1833	236.241	50.2462				204060	2420.6	33.5636	526.632	25.809	142.043	19.816				3040330	2599.66	36.9713	383.067	17.305	302.702	53.2387				404090	2108.66	30.0785	510.231	23.72	186.639	29.1449				504181	1072.57	15.5558	218.471	9.6921	53.3644	7.7695
		104092	2894.77	40.6248	457.019	20.2138	283.474	42.3666				204061	2408.85	33.3239	520.634	25.7844	119.659	23.7824				3040331	2881.11	40.5368	402.465	18.4243	275.005	46.5161				404091	3153.54	44.6929	804.062	38.0355	121.444	15.3149				504182	824.177	12.1074	214.13	10.0206	59.0498	11.2635
		104093	3942.9	54.8309	550.079	23.7169	302.085	44.408				204062	2208.09	30.8123	526.637	25.5039	124.548	21.5842				3040332	2733.99	38.5513	411.705	18.9708	273.545	43.277				404092	2362.92	33.6336	603.256	28.4621	128.324	16.4156				504183	459.19	7.2815	172.791	8.3352	51.9105	10.9489
		104094	2926.84	41.5745	502.961	21.9694	260.816	45.2804				204063	2878.74	40.5827	720.732	34.6444	111.411	15.1186				3040333	3280.73	46.5084	497.755	22.8402	270.715	43.7339				404093	3204.09	45.718	769.559	36.3185	288.344	38.612				504184	1107.31	16.2687	258.092	11.479	54.2395	6.2756
		104095	2661.31	37.3037	393.984	16.9298	292.221	60.419				204064	2210.71	32.1194	394.212	15.5692	257.399	28.6603				3040334	3194.82	44.8971	468.446	21.4914	251.22	40.2821				404094	1315.28	17.99	179.314	8.6394	381.483	72.9479				504185	614.091	8.9413	121.241	5.38	61.5636	7.8648
		104096	4588.16	65.46	1012.91	46.0269	572.879	70.7225				204065	2345.63	34.605	509.813	20.2364	267.586	35.1664				3040335	3159.64	43.9424	397.425	18.4298	333.171	61.551				404095	2468.27	34.3161	364.454	17.0782	543.343	82.7163				504186	1041.22	15.146	179.784	7.9176	54.3363	6.3782
		104097	2462.24	34.2264	365.506	15.947	243.008	52.6956			V13	204066	2111.23	31.9994	577.092	23.881	237.153	45.9457				3040336	2465.14	36.0475	565.904	25.2704	135.978	22.1617				404096	414.425	6.8652	155.82	7.0852	37.7456	5.082				504187	1011.67	14.1511	151.152	6.9043	60.7725	7.517
		104098	3247.19	45.0303	510.966	22.8774	165.767	24.7773		1.8714	total dry weight	204067	2242.32	34.0333	589.028	24.4467	244.033	47.568				3040337	1951.75	29.3653	536.001	24.3966	134.595	21.4034				404097	2540.3	37.2052	671.875	30.875	166.962	21.1134				504188	715.487	10.2719	119.276	5.6493	45.8072	5.1047
		104099	3549.78	48.9135	569.119	24.6547	189.015	32.6803		0.6924	part1	204068	1808.43	25.1171	332.347	16.3332	143.774	31.6018				3040338	2395.77	36.3969	624.181	28.3027	112.765	16.1352				404098	2701.47	38.9192	641.483	30.0333	194.532	27.1515				504189	1018.09	14.2857	156.635	7.5826	36.9677	4.101
		104100	2242.98	31.2579	358.882	15.6205	139.058	21.6353		1.179	part2	204069	2244.47	31.4036	429.023	20.8885	163.649	30.9557				3040339	1988.68	29.9161	526.423	23.622	178.485	27.2645				404099	1943.98	28.4362	502.709	23.5939	124.262	16.5148				504190	534.742	8.1973	232.817	11.9076	65.6305	13.2069
		104101	1688.35	24.087	327.887	14.7861	153.45	22.4				204070	2047.17	28.9912	423.235	20.8665	143.732	28.6816				3040340	2242.14	33.7615	635.821	29.0405	88.9647	11.5653				404100	2033.62	30.4614	542.442	24.9526	113.449	16.0728				504191	567.888	8.5375	196.27	9.402	99.9824	15.1661
		104102	2425.33	33.3437	316.805	14.0522	168.782	34.2771				204071	1697.75	23.6774	341.183	16.892	132.219	24.411				3040341	2248.01	34.0896	673.629	30.5418	170.177	24.6737				404101	2564.89	36.8939	690.549	32.1322	179.464	26.7222				504192	491.028	8.2592	286.883	13.899	75.6155	14.5949
		104103	2533.48	35.0041	351.038	15.2439	156.703	27.4883				204072	2457.73	34.3514	478.42	22.6427	134.048	20.498				3040342	2687.37	40.5824	819.57	37.6356	110.225	14.3965				404102	2794.77	39.6412	624.574	28.764	186.802	29.5083				504193	527.678	8.3252	229.482	10.8576	85.2227	14.1176
		104104	2497.52	34.7695	349.398	15.4969	212.237	40.2731				204073	1996.46	27.8649	385.117	19.2494	167.36	39.1217				3040343	2150.78	33.4492	659.41	30.5491	76.6694	9.3049				404103	2991.27	42.3326	642.699	30.2551	231.233	37.2469				504194	488.367	7.531	235.834	11.4051	79.2549	13.7832
		104105	2851.9	39.7785	440.185	19.1982	216.542	41.9058				204074	1813.01	25.7439	386.796	19.4444	153.35	37.9839				3040344	2411.56	35.4691	744.202	34.7941	163.954	24.9792				404104	1115.32	17.1997	393.586	18.1519	70.9802	10.1109				504195	905.714	13.6931	347.385	16.5267	64.3467	10.6599
		104106	2597.27	36.5932	407.882	18.0675	168.913	25.9035				204075	2352.49	33.9506	479.685	23.3426	58.9725	7.4852				3040345	2359.77	36.0196	747.006	34.583	111.502	15.0842				404105	2573.7	36.7576	510.55	23.2915	318.318	56.1582				504196	224.511	3.8176	145.99	7.2431	39.553	5.0094
		104107	1742.39	24.8099	278.658	12.3973	111.409	20.9929				204076	2338.05	34.072	493.664	23.8895	36.5869	4.481				3040346	2641.45	39.8468	813.104	37.7378	118.897	16.225				404106	2982.58	42.5204	697.784	32.3087	234.518	36.6026				504197	435.734	6.8368	226.586	11.5621	33.5334	5.9285
		104108	2149.42	29.7301	293.594	13.2913	176.204	39.2794				204077	1398.02	19.8096	278.683	13.3566	104.33	22.648				3040347	2226.96	33.4517	608.717	28.0874	124.067	16.2038				404107	2819.15	40.1419	662.628	30.752	201.378	29.2292				504198	701.674	10.3069	262.546	13.0623	56.494	8.2381
		104109	2367.97	32.6239	346.179	15.3828	107.849	21.4897				204078	1571.46	22.3179	288.838	14.092	127.918	21.9467				3040348	2121.74	32.5413	604.438	27.9724	52.3089	6.0291				404108	3020.73	42.8106	691.154	32.2785	186.206	27.2679				504199	379.279	5.8931	215.213	11.0666	29.4202	5.838
		104110	2525.97	34.8025	379.277	16.7953	134.206	26.1227				204079	2331.86	34.8199	614.696	26.0827	205.758	35.5176				3040349	2101.52	33.1271	622.72	28.6199	55.7307	6.7767				404109	3037.33	43.4695	794.763	37.1416	146.411	21.5651				504200	609.377	9.4613	228.386	11.0115	55.7045	7.1689
		104111	2930.75	41.1258	474.882	21.1154	128.562	19.3608				204080	2142.14	31.913	574.951	24.3798	187.521	32.1027				3040350	2011.58	32.3441	644.424	29.3911	23.8428	2.4767				404110	2787.32	39.0563	680.836	32.385	115.921	18.7274				504201	585.049	8.9553	189.817	9.1282	75.5245	9.3352
		104112	3911.01	53.8603	533.435	23.9547	188.295	31.15				204081	1835.87	27.8078	475.298	20.1169	201.482	25.8594				3040351	2288.4	35.2763	645.843	29.4324	63.6285	7.8532				404111	2257.58	31.437	495.056	23.2058	211.501	46.3824				504202	497.94	7.761	217.848	10.8314	67.4783	9.5124
		104113	3993.33	55.144	593.556	26.441	169.067	22.5359				204082	2145.9	30.1519	381.479	18.3628	47.6727	7.1435				3040352	1823.03	27.7375	555.178	25.8725	96.0262	13.4437				404112	1563.01	22.0017	305.824	14.1223	123.557	22.0603				504203	1765.07	26.5957	571.578	27.1213	23.011	2.291
		104114	3951.81	54.4199	600.057	26.6847	242.222	40.2698				204083	1360.62	19.6952	276.066	13.6214	74.634	16.0632				3040353	2247.73	33.4492	666.236	30.8938	128.303	19.4379				404113	1612.81	22.6564	307.306	14.0866	131.854	27.5731				504204	1466.48	22.3533	458.509	21.4361	18.7533	1.9583
		104115	3474.29	49.1472	579.065	25.6861	244.022	39.4475				204084	1867.45	26.5296	363.405	17.6656	75.8539	14.6086				3040354	2125.34	32.0324	653.734	30.2586	120.341	17.8322				404114	2227.6	31.2219	448.963	20.9133	192.305	31.2747				504205	1182.26	18.4524	413.2	19.5002	14.5249	1.3971
		104116	2962.04	41.5791	533.834	23.9867	272.669	48.7469				204085	1601.02	22.8541	304.694	15.1169	115.269	22.1394				3040355	2366.33	35.632	691.824	32.0198	126.757	17.5502				404115	2617.1	36.4454	477.072	21.8534	209.94	35.1269				504206	1827.7	27.3231	527.135	24.6332	22.265	2.1904
		104117	3511.36	49.074	544.984	24.3147	231.195	34.0535				204086	1755.67	24.6404	338.411	16.6689	89.7488	15.1774				3040356	2496.42	36.9566	679.05	31.4175	149.449	18.953				404116	2823.23	39.1861	472.44	21.9939	253.472	46.4315				504207	1987.3	29.5191	648.007	30.8548	37.0967	3.7649
		104118	3791.15	53.2728	620.077	27.7446	267.408	36.2359				204087	3013.07	42.5471	679.721	33.978	197.859	36.2263				3040357	3229.38	47.889	827.223	38.0985	89.301	10.4036				404117	2868.14	41.133	610.89	28.1092	232.925	36.021				504208	2207.71	32.6186	683.821	32.6633	32.616	3.3125
		104119	3746.61	52.3913	630.208	28.1217	306.192	41.5502				204088	3360.93	47.6206	751.848	36.4565	150.179	19.4793				3040358	3872.98	56.1279	896.469	41.5652	117.704	14.2757				404118	2735.49	38.8932	603.274	27.9226	229.026	36.5251				504209	2087.74	30.6947	625.36	29.913	26.0244	2.5619
		104120	3463.9	48.4786	550.374	24.8161	294.089	54.2902				204089	3548.67	49.8688	768.276	36.6305	215.433	36.1234				3040359	3169.26	46.648	833.817	38.8753	104.073	12.7395				404119	2919.86	41.8879	722.585	33.2032	192.734	30.5795				504210	2685.14	38.8435	779.217	37.6582	47.6822	4.788
		104121	3022.87	42.3555	509.183	22.7638	308.023	59.137				204090	4038.3	57.328	945.202	46.194	225.413	35.5396				3040360	3634.72	53.5824	912.361	42.2205	74.1323	8.1045				404120	2645.41	37.5121	539.875	24.9189	236.707	38.4933			W23	504211	846.713	12.6605	186.143	8.008	82.1833	8.989
		104122	2980.09	41.5104	475.229	21.379	238.004	40.836				204091	2575.26	36.7808	591.373	28.9827	173.758	30.9112				3040361	2534.07	38.0742	701.373	32.9757	117.39	13.8957				404121	2961.02	42.457	675.699	31.12	196.241	29.5556				504212	1191.9	16.6165	164.954	7.9056	55.6937	6.0962
		104123	6465.4	93.648	1735.21	81.1088	987.258	96.9841				204092	2541.91	35.82	562.449	27.3412	146.16	24.1183			N32	3040362	1089.85	16.0226	164.653	7.5631	90.3516	14.4392				404122	2110.56	30.0613	489.656	22.9569	108.225	14.8181				504213	1236.11	17.0746	151.541	6.9705	76.051	8.603
		104124	3013.81	42.341	540.478	24.7206	418.455	77.1836				204093	2555.86	35.9359	509.275	24.4812	108.114	18.1917				3040363	1299.89	18.4179	170.281	7.4461	120.299	19.1571				404123	426.232	7.1419	233.734	10.444	39.9873	4.7125				504214	1466.07	20.2088	186.805	8.7351	58.9567	7.5772
		104125	2719.34	37.786	457.032	21.3575	323.212	59.4456				204094	3722.03	51.7229	724.291	35.4196	150.287	19.7695				3040364	883.452	12.9827	132.901	5.967	100.682	17.4333				404124	2122.69	32.8094	882.552	39.6012	198.482	25.0243				504215	1643.21	22.2715	175.731	8.2932	68.7755	8.6532
		104126	2224.83	30.6806	371.405	17.2055	146.419	22.8163				204095	3532.7	49.8485	774.28	37.7204	187.785	28.0981				3040365	1407.6	20.28	238	10.8557	142.217	15.8892				404125	2960.31	42.5388	797.502	37.2128	191.693	26.4547				504216	1561.03	21.642	259.195	11.8952	49.936	8.8606
		104127	2422.32	33.2037	354.019	16.4178	126.54	20.8325				204096	3049.5	42.5517	669.866	33.2364	216.301	31.2029				3040366	1003.41	14.6885	146.007	6.4702	94.7574	18.8894				404126	2504.71	36.8804	725.71	33.5024	198.934	27.7576				504217	839.472	12.7681	240.945	10.9756	61.8811	9.3836
		104128	2258.9	30.795	361.078	16.9818	138.24	22.17				204097	3148.08	45.0409	783.676	38.6155	291.058	43.3217				3040367	1164.41	16.7956	143.246	6.5164	84.4712	13.2712				404127	2937.53	41.559	620.536	28.7234	175.839	27.698				504218	1440.29	20.4069	350.535	16.3612	68.9552	13.7742
		104129	3090.37	42.8121	517.239	24.059	189.651	22.987				204098	976.365	13.7665	189.443	9.3525	343.702	93.5293				3040368	1296.48	19.0309	158.791	7.0218	64.637	8.2261				404128	2428.71	35.4131	605.237	28.0036	147.482	21.8762				504219	1224.79	17.0213	240.859	10.8408	60.0849	8.8965
		104130	3075.36	42.5064	511.348	24.036	159.765	27.5881				204099	602.433	8.5439	116.605	5.7363	322.594	102.128				3040369	969.13	13.9926	128.865	5.6691	63.2829	9.6588				404129	2785.83	40.1001	588.76	27.1852	328.656	62.6934				504220	1034.43	15.27	272.42	12.3774	55.4665	9.3823
		104131	2819.06	39.3027	517.244	23.7746	166.292	25.0382				204100	1423.37	20.5466	346.781	17.1238	393.561	91.8172				3040370	1064.47	15.7055	137.23	5.9685	100.111	15.4384				404130	2811.45	39.9473	567.047	26.1399	214.989	35.2741				504221	1074.53	15.0385	212.141	9.7843	78.7259	18.5095
		104132	3675.26	51.7654	707.877	32.2953	148.751	17.538				204101	674.667	9.5809	106.971	5.2579	221.155	64.0825				3040371	1397.9	20.2279	161.399	7.0459	70.5517	9.9113				404131	3314.77	47.1817	777.371	36.2014	196.463	29.5718				504222	1462.27	20.1241	190.524	8.6493	82.4112	11.751
		104133	2087.27	29.4944	350.579	15.6809	112.709	12.8649				204102	2478.95	35.1132	523.273	25.9278	267.028	41.0572				3040372	1187.01	17.1036	146.273	6.4199	63.099	8.0168				404132	3721.11	53.0367	866.827	40.6164	174.135	24.6622				504223	1423.07	19.4785	211.017	9.6022	88.2631	12.4795
		104134	3135.64	43.6312	521.189	23.9062	153.707	17.2856				204103	3135.66	44.2583	769.67	37.7348	240.275	31.7768				3040373	943.048	13.9198	125.523	5.5964	96.7631	15.1509				404133	2185.45	30.9007	397.302	18.263	332.703	72.9543				504224	1384.58	18.7416	270.154	12.0932	81.0712	15.1146
		104135	3090.69	42.7615	526.909	24.4408	148.412	17.7558				204104	2167.1	32.7545	603.467	25.7319	142.712	21.0905				3040374	1142.58	16.5678	150.271	6.6858	75.8429	10.863				404134	2962.4	41.5934	587.127	27.0041	303.788	57.3542				504225	1173.42	16.1666	193.017	8.7891	52.3207	7.8816
		104136	3949.07	55.5428	657.018	29.6555	69.981	5.2613				204105	2411.61	36.0083	688.086	29.495	214.961	34.9778				3040375	1253.09	18.0501	155.492	6.8372	85.6987	14.8235			N22	404135	3009.73	43.5186	521.303	24.3524	198.973	32.3151				504226	795.537	12.1257	267.196	12.4501	54.3408	10.1455
	V13	104137	3143.98	44.697	627.696	29.4923	84.1566	6.7502				204106	2084.86	31.4045	611.568	26.2793	145.331	21.19				3040376	1371.42	20.1949	217.805	9.615	75.0513	12.0115		7.7642	total dry weight	404136	3459.19	49.4385	672.751	31.7867	134.776	18.8605				504227	1152.95	15.8435	209.656	9.5628	58.8747	9.7663
		104138	3356.25	47.9807	671.625	30.9948	51.2983	4.2345				204107	2678.83	40.0002	739.925	31.2975	230.679	41.231				3040377	1976.85	27.238	202.341	9.1026	79.4136	13.5386		3.0206	part1	404137	3137.51	44.5205	624.007	29.6394	104.263	14.347				504228	1468.15	20.2436	222.082	10.0775	65.2705	9.5346
		104139	3476.13	49.5287	780.138	36.6325	114.111	10.0544			V21	204108	2125.87	29.5975	278.006	12.3599	176.321	33.5424				3040378	1182.92	16.7885	165.048	7.3073	83.4865	12.5477		4.7436	part2	404138	1465.72	20.8856	237.435	11.009	167.204	33.1291				504229	767.827	11.0269	165.105	7.7147	33.7424	4.723
		104140	2527.31	35.6358	465.966	22.1473	100.195	14.2373				204109	1909.06	26.7792	279.864	12.5722	182.414	37.6543				3040379	947.661	13.7099	106.047	4.6906	70.1092	6.99				404139	2186.87	31.0882	301.013	14.0187	211.774	38.5231				504230	755.677	10.8847	153.146	6.8006	52.9817	6.8772
		104141	1846.82	26.0637	351.555	16.3089	121.219	20.9383				204110	1975.24	28.1478	349.288	16.1501	120.575	21.7037				3040380	1199.36	16.5635	93.5038	4.213	82.7608	8.4374				404140	2463.22	35.2761	367.135	17.2153	211.548	37.6705				504231	1196.92	17.2066	321.345	14.9704	60.3297	13.5411
		104142	2057.28	28.505	357.289	16.841	157.815	26.0607				204111	2133.48	29.9976	346.972	15.8632	109.639	18.1438				3040381	3089.94	44.6068	589.573	27.204	66.2337	7.2728				404141	1682.89	24.3885	252.883	11.568	161.38	27.9802				504232	1045.2	15.1833	276.153	12.7766	81.6399	15.3698
		104143	2553.32	35.6395	461.22	21.5379	179.631	25.528				204112	2577.68	36.8463	412.384	18.6439	119.809	19.86				3040382	3257.78	47.1339	609.857	27.9071	100.436	10.6374				404142	2818.25	39.2646	382.892	18.2622	172.567	28.97				504233	504.985	7.4414	120.539	5.5994	40.065	8.2877
		104144	2328.88	32.9016	454.998	21.5153	157.769	23.6526				204113	1983.16	28.9372	349.804	16.028	85.41	13.0596				3040383	3335.5	47.9153	658.914	30.4606	102.421	10.4281				404143	3631.37	50.9438	671.333	32.3449	138.866	17.5722				504234	689.805	10.0358	151.583	7.2412	25.497	6.3061
		104145	1931.37	26.8711	366.788	17.4172	145.131	20.1308				204114	1948.67	28.0501	321.957	14.3493	139.152	26.5171				3040384	3287.97	47.2358	646.986	30.0292	118.855	12.7318				404144	3266.73	45.639	484.493	23.0589	185.391	26.6899				504235	582.918	8.7253	156.623	7.3898	42.6625	9.5802
		104146	2795.93	38.9849	514.324	23.3467	147.139	16.9039				204115	1865.01	26.5973	302.301	13.5591	135.233	24.5656				3040385	2538.14	37.3601	494.865	22.6629	55.8592	6.0957				404145	2509.98	36.9888	570.511	26.5659	166.968	28.097				504236	850.15	12.6217	186.001	8.5344	28.3158	4.4181
		104147	2250.46	31.5849	418.465	19.0414	129.853	15.1812				204116	2339.51	34.2498	392.995	17.822	105.822	16.3594				3040386	2525.33	36.6256	468.969	21.5864	73.313	7.9912				404146	3118.27	45.3058	693.731	32.5096	140.145	16.6523				504237	713.434	11.3138	221.406	10.4344	13.15	1.456
		104148	3006.6	42.8842	588.695	27.3721	55.3862	4.625				204117	2210.2	31.9208	373.122	16.9561	135.146	24.0477				3040387	2508.6	37.14	470.2	21.4092	37.514	3.8493				404147	2980.04	42.5426	464.873	21.9315	328.089	58.5978				504238	622.306	9.8474	203.8	9.5391	3.6964	0.4177
		104149	2495.17	36.1003	506.721	23.5058	23.2162	1.7871				204118	2412.02	33.9974	389.976	17.8703	115.418	21.3596				3040388	457.501	7.305	206.312	10.178	158.322	25.7381				404148	2285.75	32.9758	464.046	21.6532	87.557	10.0835				504239	957.341	14.6474	291.53	13.7971	18.4208	2.0044
		104150	2271.18	31.6235	414.019	19.8479	183.704	32.2622				204119	2146	31.0067	401.517	18.3237	110.715	18.7212				3040389	397.041	6.3899	193.103	9.2802	199.037	31.0257				404149	3431.6	49.3373	647.309	30.6085	106.979	12.9857				504240	929.088	13.5519	219.634	10.4137	46.4631	7.6724
		104151	2062.49	29.2163	415.825	20.0489	168.326	31.3239				204120	2038.91	30.119	377.962	17.5378	81.2361	10.3737				3040390	524.543	8.4894	217.829	10.6111	171.889	26.3326				404150	3446.87	49.4628	593.313	27.7659	186.438	24.9431				504241	1076.14	15.1089	278.919	13.7705	49.3822	11.2683
		104152	2676.21	38.53	515.685	24.0683	64.7318	6.1728				204121	1855.48	27.0608	284.976	12.9878	160.433	25.9522				3040391	541.741	8.9656	230.578	11.0002	133.712	19.0414				404151	2391.75	33.8978	296.927	13.7754	293.913	50.7743				504242	656.31	10.1147	217.733	10.1379	55.0155	8.8093
		104153	2659.78	38.6678	530.712	24.6322	40.16	3.6953				204122	2494.75	35.8155	454.219	21.1305	114.498	13.8959				3040392	306.372	5.1289	97.3187	4.6153	29.1579	3.8205				404152	590.778	9.4847	179.565	8.1506	87.835	16.5527				504243	1033.41	14.9546	238.477	11.3763	33.5169	6.9823
		104154	1590.39	22.4816	299.597	13.7718	114.519	18.6769				204123	1639.69	23.5626	297.608	14.1559	189.332	27.2038				3040393	921.967	13.6659	228.482	10.6489	137.44	20.5903				404153	1442.95	21.0837	264.817	12.2168	101.393	17.5761				504244	711.165	10.4586	195.976	9.2509	45.093	8.973
		104155	1787.7	25.3283	310.515	14.5301	140.411	18.0986				204124	1642.09	24.6976	314.638	14.6543	77.3201	10.2403				3040394	998.858	14.8609	272.083	12.2238	164.273	30.7017				404154	1398.35	20.4203	272.527	12.4485	79.0049	14.1859				504245	933.221	13.8341	269.536	12.9135	46.3947	9.9481
		104156	2441.19	34.219	410.108	18.9337	52.3285	5.891				204125	1671.58	24.3696	297.758	13.7786	190.429	21.8309				3040395	1055.39	15.4589	269.741	12.1988	147.456	23.3391				404155	1470.01	21.9787	346.76	16.1473	79.0793	11.7533				504246	333.822	5.4755	139.566	6.5441	31.2846	7.2898
		104157	1547.85	22.3517	296.784	14.0449	81.9228	13.2467				204126	1772.14	25.2211	317.311	14.7337	172.639	22.4664				3040396	1519.91	22.0662	327.437	14.7337	174.929	29.1083				404156	1515.61	22.6545	360.838	16.3946	91.2916	15.4013				504247	815.064	12.2398	225.909	11.0195	76.375	16.954
		104158	1850.28	25.8612	313.989	14.6543	113.495	22.304				204127	2580.89	36.6851	591.198	28.4794	187.892	20.7614				3040397	1482.91	22.0356	382.883	17.4588	143.132	21.1834				404157	1598.47	23.7667	391.258	18.0193	95.7821	14.5794				504248	936.902	14.3578	318.906	14.9821	65.2921	13.9191
		104159	2014.2	27.928	336.692	16.0275	80.601	13.4329				204128	2182.23	31.6902	442.707	20.8443	189.598	21.189				3040398	1176.58	17.0379	238.204	10.743	185.449	31.0012				404158	1390.56	20.4649	310.979	14.4234	110.206	18.8056				504249	854.857	12.4529	212.03	10.1242	56.8408	10.4154
		104160	2124.42	30.108	390.678	18.2149	83.2619	12.0471				204129	2850.2	40.6702	518.396	24.3972	164.907	18.843				3040399	1163.65	17.4214	297.764	13.3881	163.976	25.265				404159	1212.31	18.5555	347.647	15.9707	88.3374	16.5222				504250	620.014	9.523	188.659	8.7529	53.364	10.5509
		104161	1821.33	25.9367	327.56	15.5869	126.526	18.2575				204130	2877.44	41.7214	661.157	31.7053	228.949	24.5547				3040400	1508.36	21.8042	338.276	15.5382	137.581	22.64				404160	730.996	11.8725	249.619	11.3742	50.0016	7.2243				504251	520.631	8.7777	290.979	13.5909	55.9776	8.559
		104162	1997.26	27.964	363.808	17.1871	98.5137	12.5162				204131	1761.62	26.6305	435.988	20.5031	139.273	16.5628				3040401	1222.04	18.5482	369.111	16.8512	204.938	30.2181				404161	363.777	6.0799	120.83	5.4653	61.8104	9.8394				504252	1108.79	16.2564	261.7	12.028	48.7031	9.4273
		104163	1836.67	25.8616	307.503	14.0969	75.6274	10.142				204132	2499.02	36.1971	498.187	23.6316	197.661	25.5662				3040402	1292.13	18.8846	342.724	15.7627	101.55	15.5357				404162	1704.52	24.8813	331.991	15.0364	87.3593	12.992				504253	1104.02	16.0828	300.297	14.1268	46.4521	11.0342
		104164	2285.83	32.2104	418.738	19.4893	98.1017	13.9296				204133	1841.17	27.7297	455.308	21.4216	118.224	12.7599				3040403	1737.89	24.9972	413.878	18.9903	83.6481	10.8005				404163	1645.85	24.3321	345.699	16.213	112.131	16.6322				504254	201.34	3.6048	137.211	6.2604	34.609	4.6861
		104165	3427.69	48.2861	730.733	35.0344	217.182	29.8744				204134	2570.27	36.2576	647.716	30.6636	182.26	30.532				3040404	1456.66	21.3428	372.498	17.4149	45.7287	4.9531				404164	1947.8	29.3487	432.221	19.465	137.585	23.5137				504255	1478.34	22.1488	480.014	22.8961	69.6289	13.5839
		104166	3823.42	54.0439	808.273	37.59	164.845	16.0638				204135	2139.08	30.2389	505.547	23.7967	194.378	33.9144				3040405	1569.26	22.3316	333.745	15.3006	65.6168	7.203				404165	2360.28	34.7475	477.756	22.207	113.75	17.8212				504256	1050.27	16.2183	365.992	17.3399	71.9331	14.366
		104167	4036.98	56.5953	825.934	37.7694	236.472	29.7896				204136	2925.44	40.9207	639.52	30.228	214.497	33.7663				3040406	1029.6	15.5291	249.395	11.3983	14.9769	1.3754				404166	2066.48	30.8005	450.163	20.5198	115.258	17.1933				504257	1060.63	15.442	252.431	11.6796	56.0239	8.3945
		104168	4593.99	65.0606	1016.14	47.6303	247.427	29.3081				204137	2385.32	34.25	597.888	27.9917	166.975	25.4378				3040407	713.928	10.8953	176.05	8.0707	6.3905	0.5804				404167	2014.93	30.0708	529.544	24.7288	107.546	17.4382				504258	619.551	9.4192	155.026	7.3162	48.997	8.9587
		104169	2929.63	41.7419	635.754	29.8838	190.727	25.4913				204138	1714.99	24.5853	442.311	20.9143	153.18	32.0606				3040408	1304.15	18.9786	299.988	13.497	186.457	30.7261				404168	2149.86	32.1434	593.904	27.4502	89.9859	12.9181				504259	720.686	11.1982	263.823	12.4069	55.2707	10.0865
		104170	2811.17	40.3097	617.871	28.494	107.721	10.702				204139	2256.03	32.0578	479.989	22.7947	124.912	19.4435				3040409	1293.68	19.071	326.635	14.9546	133.115	22.3186				404169	1843.01	26.8251	390.745	18.0837	75.6406	10.7861				504260	1493.22	21.3391	373.492	17.4624	49.2808	7.5378
		104171	2668.86	37.4111	516.844	24.5156	146.662	18.0867				204140	3066.58	43.8677	782.483	37.3225	168.759	20.9909				3040410	1220.73	17.6777	291.662	13.1551	159.014	31.4226			N23	404170	1886.94	27.4189	487.186	21.8454	186.393	32.2828				504261	1245.09	18.2097	278.459	13.3872	62.2867	10.6373
		104172	2891.69	40.6515	604.659	28.1913	160.434	19.8894				204141	1738.22	24.8585	397.193	18.0479	104.472	23.5406				3040411	1339.16	19.376	325.079	15.0238	111.467	15.5671		7.7642	total dry weight	404171	2286.53	32.4627	538.512	24.9228	154.102	24.4674				504262	604.196	9.167	171.71	7.8844	44.3253	6.7924
		104173	2907.57	40.7831	547.495	25.2424	118.672	15.002				204142	2060.39	29.9354	542.282	25.1876	132.823	26.2255				3040412	1401.15	20.2825	263.35	11.7191	164.336	24.5091		3.0206	part1	404172	2001.91	28.7752	507.41	23.0292	156.146	23.6053				504263	936.879	14.4015	282.685	13.3906	62.9382	12.0054
		104174	4234.2	58.6995	778.648	36.5209	164.964	16.3031				204143	1794.84	25.7826	449.353	20.3675	153.155	34.6445				3040413	1410.66	20.8524	345.459	15.6941	173.676	35.2664		4.7436	part2	404173	1951.97	28.0935	596.885	27.7529	145.698	23.9415				504264	598.286	9.0209	154.49	7.0592	39.8067	6.4887
		104175	3481.97	48.6098	720.742	34.2422	216.44	25.1687				204144	2102.62	30.4115	462.151	21.3522	121.49	23.6076				3040414	1662.57	23.988	353.57	16.1302	133.117	21.1263				404174	2082.68	30.0298	669.43	30.8072	121.908	17.7357				504265	893.01	13.9232	329.007	15.1377	76.5537	12.4045
		104176	3597.31	51.5282	793.745	37.1679	182.41	21.0828				204145	2507.47	35.9222	600.913	27.8133	119.736	21.5199				3040415	1477.45	21.262	302.037	13.7396	129.701	24.3893				404175	1785.42	25.0612	440.436	20.2951	102.474	14.8086				504266	781.617	12.0365	254.243	11.8623	95.517	17.0446
		104177	4018.81	56.5723	832.388	38.8932	206.124	23.1714				204146	2387.82	34.0988	509.343	23.254	121.144	22.0417				3040416	1691.33	24.1169	359.296	16.4099	153.069	23.4863				404176	268.778	4.1572	55.0837	2.4323	119.263	21.1768				504267	941.366	13.8893	247.742	11.5566	42.6622	6.8626
		104178	3469.12	48.2913	720.139	34.2697	237.425	25.7318				204147	2102.98	30.2458	504.884	23.5498	158.928	31.655				3040417	1531.28	21.9964	308.179	14.1261	119.609	19.0963				404177	402.698	6.1882	103.974	4.6422	143.566	23.1489				504268	1016.63	15.5653	309.371	14.4661	75.1578	13.3335
		104179	3581.27	51.1162	842.489	39.8161	319.483	35.7258				204148	1885.48	27.7323	513.793	23.8999	177.547	37.4866				3040418	1641.72	23.7192	363.168	16.4772	155.592	27.524				404178	1466.54	20.4145	357.872	16.7334	142.243	25.0801				504269	755.446	11.473	247.298	11.7003	116.677	21.4081
		104180	621.322	9.1611	141.059	6.7586	243.816	52.9536				204149	1067.34	15.3941	174.223	8.5077	118.782	13.6976				3040419	1516.98	22.0337	354.974	16.0689	150.242	25.7934				404179	1769.58	24.6205	379.02	17.7806	155.73	30.1473				504270	1046.23	15.4333	268.882	12.3504	92.345	14.6126
		104181	612.869	8.6359	103.731	4.7836	296.725	64.8				204150	963.28	14.1279	170.835	8.531	151.595	17.8804				3040420	1621.48	23.3941	352.656	15.8729	136.037	23.5597				404180	272.87	4.2337	83.1435	3.7868	78.1396	12.4699				504271	467.703	7.777	213.184	10.0968	50.6062	11.3556
		104182	693.699	9.8365	123.776	5.8199	344.806	76.1782				204151	1513.59	21.3487	300.166	15.0767	103.204	13.8187				3040421	1592.63	22.9758	351.198	16.1662	104.641	15.4094				404181	946.868	13.8704	207.318	9.3665	214.012	40.9622				504272	1562.58	22.6211	438.094	21.0091	106.298	22.6245
		104183	1110.72	15.6233	203.66	9.6432	377.268	77.13				204152	1628.44	23.7243	344.55	16.6876	143.381	19.4162				3040422	1256.34	18.3466	324.536	14.7468	96.3509	14.7746				404182	732.391	10.8526	213.165	9.7438	100.625	18.2222				504273	612.882	9.7945	224.891	10.9	66.1993	15.3083
		104184	695.74	9.916	126.128	5.9264	331.357	76.3181				204153	1223.28	18.2027	250.537	12.308	132.437	19.3253				3040423	1838.81	26.2438	387.386	17.4372	145.065	27.7763				404183	920.173	13.1508	258.868	12.4407	38.1769	6.8826				504274	1158.69	16.9046	325.369	14.86	87.9714	14.291
		104185	775.811	10.9603	135.971	6.3511	314.182	77.978				204154	543.806	8.5264	128.455	6.3154	111.129	16.4991				3040424	1634.26	24.0748	388.046	17.488	165.818	31.6244				404184	2034.07	28.2528	533.75	25.3991	91.4706	10.5308				504275	724.366	11.7812	358.157	17.17	85.4184	14.3321
		104186	685.331	9.6963	125.356	5.9147	354.098	84.2211				204155	794.149	11.7793	181.122	8.9819	77.9146	10.3435				3040425	1747.68	25.5985	421.816	19.1012	134.363	25.2782				404185	3466.84	47.3076	808.05	37.7742	131.774	16.1417				504276	648.404	10.0117	239.285	11.305	80.3736	16.4168
		104187	780.519	11.0384	122.878	5.5851	367.922	82.2998				204156	974.242	14.1522	173.703	8.4122	140.578	19.3056				3040426	2038.7	28.6109	396.99	18.0529	114.537	17.8659				404186	4016.86	55.3266	968.535	45.5634	181.607	25.0589				504277	1147.22	17.8041	391.177	18.4528	64.7512	8.7661
		104188	769.02	10.6967	131.842	6.2122	360.464	88.4759				204157	804.274	11.9165	159.494	7.9644	122.447	17.9737				3040427	2439.52	34.5535	463.784	21.243	104.601	15.724				404187	3950.02	55.0184	964.486	45.1044	241.503	33.4954				504278	409.482	7.3213	339.124	16.3679	28.9463	5.1131
		104189	760.919	10.7295	126.462	5.9224	385.483	80.7233				204158	1012.94	15.6008	354.675	16.5619	216.377	45.9315				3040428	2043.09	28.9632	388.508	17.5901	137.984	23.9633				404188	3808.39	52.3439	677.048	31.4597	274.778	40.5129				504279	538.674	9.3123	349.967	16.6938	43.297	6.4691
		104190	481.168	6.8804	81.2068	3.8293	333.159	77.4944				204159	1120.07	16.7188	301.015	13.9232	124.038	22.6954				3040429	1896.31	27.3174	433.426	19.5536	114.425	20.4126				404189	3749.91	50.9135	585.447	27.6182	452.624	73.376				504280	682.128	11.8472	505.859	24.8535	71.9951	11.0299
		104191	739.388	10.7509	168.077	8.1506	398.156	82.2292				204160	1179.89	17.3257	402.031	18.5132	265.726	62.585				3040430	1714.48	24.2307	309.938	13.8554	115.799	21.2325				404190	2301.98	31.4323	353.237	16.3609	387.776	61.3953				504281	824.19	12.7338	362.223	17.3664	79.4775	13.2402
		104192	787.477	11.0752	143.913	6.804	310.051	68.3408				204161	1810.15	26.491	495.319	23.2953	141.036	25.8881				3040431	2155.37	29.7775	330.961	14.95	98.8414	15.7946				404191	2732.67	38.1882	754.419	35.5306	174.12	23.0468				504282	643.555	10.1965	362.239	17.463	74.0398	9.8238
		104193	1619.24	23.318	372.807	17.6562	431.996	75.7181				204162	806.873	12.853	242.337	11.4013	78.0018	8.3937				3040432	2002.16	28.1423	380.531	17.4769	112.745	19.118				404192	2391.84	33.2118	515.494	24.1085	310.871	63.7939				504283	286.279	4.8531	201.554	10.099	87.838	11.7088
		104194	524.933	7.5181	84.2247	4.021	265.611	63.9405				204163	1673.62	25.1708	461.642	21.9315	120.891	12.6851				3040433	2088.36	29.8125	434.346	19.8294	93.7942	15.9173				404193	1011.22	14.5541	267.572	12.5522	100.939	14.1624				504284	362.787	6.2821	262.161	12.823	42.4061	4.5271
		104195	767.505	10.8732	114.999	5.4214	242.753	52.8463				204164	1444.89	22.2314	390.301	18.3906	120.398	12.5734				3040434	1989.92	28.0085	371.711	16.9926	70.7516	10.2874				404194	2681.52	38.0375	649.2	30.4896	201.062	31.467				504285	632.409	10.4	324.541	15.2068	76.3804	11.1197
		104196	2820.07	39.8494	562.543	26.7339	293.106	33.8583				204165	2141.73	32.1121	538.03	25.2417	88.0964	8.5156				3040435	2211.28	31.2264	452.267	20.604	88.8493	13.4243				404195	1439	20.0845	259.371	12.062	255.551	52.8647				504286	893.339	14.1358	301.208	13.5893	79.3644	8.2833
		104197	3567.15	50.228	827.432	38.908	263.74	26.2051				204166	3203.08	42.6332	344.132	16.0618	125.111	17.6322				3040436	1593.08	22.8354	311.551	14.2655	48.8212	6.2675				404196	2631.24	37.2213	692.141	32.3094	206.518	29.1443				504287	683.47	11.3236	383.552	18.1708	72.6315	10.1753
		104198	2746.27	39.2997	638.022	30.1995	212.09	24.7371				204167	2115.78	31.5318	515.233	24.0795	96.2091	12.1744				3040437	1235.54	18.1801	230.052	10.5626	17.7848	2.0303				404197	2875.45	39.1853	488.456	23.025	268.932	48.7455				504288	680.382	10.672	278.558	13.1332	96.2201	11.3092
		104199	2507.39	35.4532	526.914	25.6804	269.324	39.7469				204168	2034.74	30.5798	479.304	22.5326	82.0773	11.0069				3040438	1893.26	27.4291	389.108	17.4622	152.197	29.4173				404198	1463.56	20.2841	264.647	12.1098	182.55	35.7597				504289	666.315	11.2455	379.041	18.1003	43.0375	4.8228
		104200	2171.66	29.9347	394.688	19.4864	255.048	37.689				204169	2521.07	37.2793	571.495	26.4619	96.9274	12.5579				3040439	2146.76	30.2215	368.908	16.6366	128.902	23.1605				404199	3327.26	47.5177	970.978	45.283	256.79	35.0428				504290	1123.99	18.2053	563.668	26.8383	44.7388	4.4648
		104201	2549.39	35.4279	504.754	23.9731	272.676	45.4131				204170	2210.98	32.2689	507.496	23.7361	96.7957	15.7155				3040440	2100.36	30.0671	408.631	18.527	81.5363	14.112				404200	2482.45	34.5153	456.353	21.317	334.872	64.2886				504291	1619.6	25.3053	722.191	34.4155	60.5329	6.6637
		104202	2533.86	35.634	510.974	24.0366	269.669	34.0074				204171	2523.44	38.0146	549.781	25.5508	72.5614	8.5553				3040441	2466.94	34.7914	451.847	20.5283	134.717	22.1054				404201	1028.13	14.3466	221.066	10.2259	134.679	24.4425				504292	1494.65	23.4956	700.515	33.3641	75.3126	7.6997
		104203	1789.41	25.0549	338.802	16.5852	189.424	27.9627				204172	2875.42	41.8471	667.79	30.9738	108.33	16.6776				3040442	2116.78	30.0826	407.823	18.7339	105.442	14.4857				404202	2968.66	41.2009	745.049	35.2914	156.179	18.557				504293	1269.21	20.7335	775.107	37.0522	70.3276	7.165
		104204	1765.84	24.8264	336.412	16.1639	171.833	23.4166				204173	2946.37	41.6432	617.191	29.1072	92.822	14.679				3040443	2071.88	29.9403	442.131	19.8498	132.18	22.0498				404203	3982.16	55.2926	1002.68	47.3333	193.909	26.1623				504294	1560.74	25.2054	934.852	45.0554	100.868	11.1972
		104205	1537.65	21.5858	272.465	13.1063	135.96	17.7056				204174	2690.41	38.2277	547.656	25.8227	113.954	17.5352			N33	3040444	1866.45	27.985	468.533	21.8889	129.861	22.3745				404204	3863.92	52.9047	800.465	37.5825	226.248	32.6082				504295	1914.74	29.6823	890.491	42.8237	102.144	11.1671
		104206	1684.25	24.1192	405.051	19.1486	190.308	29.7575				204175	1998.45	28.8584	496.71	23.4153	112.304	21.117				3040445	2183.25	32.4002	531.673	24.9425	155.797	23.385				404205	2991.79	41.1683	564.396	26.3235	267.302	42.2226				504296	1866.76	28.7543	837.865	39.7428	81.9749	8.624
		104207	2438.11	34.3039	508.123	23.9974	229.389	30.7575				204176	2397.96	34.0217	512.919	23.9885	154.529	25.1445				3040446	2607.15	37.8196	486.93	22.7138	110.757	13.5032				404206	2052.69	27.6531	278.369	13.0022	414.813	79.9502				504297	907.686	15.2112	462.763	21.6927	37.0646	4.0841
		104208	2402.3	34.2693	480.848	22.3003	79.3176	7.0084				204177	2180.32	31.3613	483.953	22.5796	130.65	23.0098				3040447	2292.45	33.0735	436.086	20.3428	138.191	20.3821			N31	404207	2670.87	38.2208	589.882	26.6494	185.498	30.1514				504298	616.05	10.1648	327.711	15.7339	38.8465	4.6291
		104209	2703.33	38.6186	540.913	25.4064	110.925	9.9781				204178	2253.42	32.6372	456.84	20.3856	238.623	44.6883				3040448	1217.07	18.5769	286.385	12.8805	180.194	38.8614		1.6272	total dry weight	404208	3151.07	43.7113	493.946	22.6046	416.559	80.0418				504299	1170.01	19.0585	703.229	34.1328	114.52	12.83
		104210	1800.73	25.7004	355.425	16.8509	117.203	12.0354				204179	2550.64	36.7319	515.267	22.9498	239.625	46.1338				3040449	1739.07	25.5353	338.76	15.1305	124.629	27.2455		0.8068	part1	404209	2921.63	41.0361	693.496	32.1422	199.123	35.4209				504300	1316.65	20.782	668.781	32.2859	89.4099	10.183
	V21	104211	1221.72	16.9704	214.463	9.8621	97.88	14.9649				204180	1945.94	27.8931	375.128	16.9237	179.638	36.9303				3040450	1483.73	21.5804	262.896	11.9357	128.857	27.4481		0.8204	part2	404210	1741.78	24.5609	365.839	16.6465	226.37	40.1339				504301	1582.99	24.8856	660.899	31.6444	41.7449	4.4596
		104212	1654.86	23.0203	323.918	14.8622	108.957	19.2286				204181	2153.83	30.5142	365.309	16.5244	168.664	31.2653				3040451	1763.56	25.8446	303.466	13.7276	111.417	22.7415				404211	2153.41	30.7998	603.324	28.0045	124.739	15.1865				504302	1476.49	23.6379	733.552	34.7791	54.8622	6.2461
		104213	1187.9	16.8528	227.05	10.8484	86.1307	10.6818				204182	1667.86	24.2587	322.345	14.6019	92.6246	14.5609				3040452	1754.74	25.7173	341.159	15.7644	135.587	24.9731				404212	3328.88	45.6541	658.134	30.4127	126.732	18.8885				504303	1844.99	28.8146	816.561	39.0465	38.1044	4.0223
		104214	2028.91	27.9622	361.24	16.5439	106.682	15.126				204183	1782	26.1744	352.552	16.2541	74.7382	11.3032				3040453	2004.33	29.1592	340.012	15.4282	118.463	20.504				404213	3805.47	51.9954	824.46	38.7097	164.762	23.0957				504304	722.957	12.1803	412.293	19.2819	18.7659	1.847
		104215	1816.72	25.212	359.408	16.6002	82.3495	12.0036				204184	709.085	11.1602	149.473	6.5651	345.297	70.2849				3040454	1782.64	26.0647	367.942	16.9071	130.25	20.4329				404214	3453.6	48.1749	697.729	32.4997	203.778	33.5224			W31	504305	1330.7	19.3109	285.435	12.9828	72.8645	9.8571
		104216	1483.02	21.0817	302.156	13.6806	78.4497	11.7665				204185	2058.94	28.9125	287.548	13.155	505.723	102.51				3040455	2015.71	29.5289	374.347	16.9881	136.446	23.7003				404215	3336.74	46.3143	553.212	25.3408	242.72	39.527				504306	906.373	13.1146	196.035	8.8833	50.6548	7.2418
		104217	1206.03	16.9257	176.898	8.0753	78.4053	9.6288				204186	1781.08	25.6392	263.909	11.6646	643.164	144.657				3040456	2230.21	32.3937	405.482	18.7869	159.428	24.2642				404216	2740.37	37.6396	332.3	15.2525	549.372	93.8423				504307	910.423	12.9567	167.434	7.4531	47.1085	7.0925
		104218	1887.47	25.7825	357.437	16.812	96.9317	18.313				204187	2272.86	32.0859	287.601	12.8467	720.118	149.054				3040457	1820.29	26.5481	326.676	14.9135	132.513	21.046				404217	2960.89	41.6539	776.313	37.0407	165.333	23.4949				504308	948.503	14.2059	178.646	8.1584	70.6309	8.4254
		104219	2250.94	31.0767	454.393	21.2977	89.7732	13.2212				204188	2059.11	28.8033	250.299	11.2333	586.43	111.733				3040458	1866.35	27.9728	420.581	19.6995	94.3914	13.9044				404218	2319.65	32.5353	589.134	28.1089	101.238	12.7679				504309	1117.12	15.9474	212.359	9.7014	47.1622	6.669
		104220	1418.01	20.4365	337.375	15.5662	96.9299	17.0316				204189	1683.47	24.2002	217.868	9.6527	494.181	94.5829				3040459	2089.67	30.3961	376.408	17.2528	179.365	33.0061				404219	2586.17	36.1357	688.143	33.0017	85.8445	10.1409				504310	1246.37	19.4132	311.781	14.2241	69.9825	7.9354
		104221	1995.34	27.8793	407.077	19.3507	97.2145	11.9549				204190	1198.28	17.52	232.397	10.7537	122.257	20.3079				3040460	2135.13	31.6327	437.185	20.313	107.711	17.1691				404220	1561.01	22.9218	396.641	18.3195	135.431	17.9299				504311	904.301	13.8254	246.128	11.3215	74.9625	10.1409
		104222	1340.23	18.8311	254.368	12.023	100.332	15.9474				204191	1710.69	25.5735	566.955	26.7334	243.564	50.4672				3040461	1993.75	29.3294	408.055	18.8888	91.5156	13.0722				404221	1116.12	15.7136	174.6	8.0036	227.066	45.7245				504312	1104.53	16.3958	240.349	10.7624	48.1912	5.9021
		104223	2161.55	29.9408	408.152	18.72	78.4999	10.4553				204192	1247.52	18.902	460.895	21.6214	217.732	50.741				3040462	1975.54	29.0895	426.048	19.88	77.6886	8.8048				404222	2410.33	32.9389	360.47	16.8677	326.072	59.3753				504313	690.867	10.0853	131.155	5.9739	33.4745	5.0177
		104224	1648.98	23.0836	342.359	15.9556	112.418	17.4383				204193	1130.17	17.0574	406.363	19.2669	178.188	30.3937				3040463	2342	33.3976	404.239	18.6179	91.7748	15.1566				404223	2209.66	31.4075	496.271	23.1824	229.716	35.9464				504314	1126.86	16.4377	262.989	11.9913	58.2331	8.1884
		104225	1231.22	17.7824	290.902	13.776	75.3025	12.3585				204194	964.12	14.3082	294.362	13.8493	77.2989	11.2563				3040464	2136.68	31.0395	407.957	18.9874	99.774	15.5355				404224	2052.11	29.1165	515.337	24.1308	210.124	31.07				504315	646.679	9.4704	131.886	5.9133	45.3503	6.9043
		104226	1622.14	22.6648	348.092	16.1062	111.341	18.1733				204195	983.914	14.9137	257.665	11.3407	423.119	93.2558				3040465	2226.04	33.4817	466.275	21.6531	26.1075	2.1866				404225	2701.07	39.6752	771.13	35.9877	104.126	11.3075				504316	876.529	12.7455	182.345	8.1283	43.1631	6.4028
		104227	2442.34	33.4418	442.647	20.4567	97.7345	14.6896				204196	1667.77	25.3151	574.593	26.1759	240.876	44.4014				3040466	1463.25	22.8428	308.579	14.2261	13.2432	1.1275				404226	2227.8	32.0402	531.039	24.6135	124.946	15.3697				504317	881.899	14.3527	339.208	15.7504	56.3582	7.245
		104228	1488.74	20.7645	290.81	13.5465	93.3511	18.6701				204197	953.697	14.7334	291.512	13.4174	48.83	5.7117				3040467	2214.29	31.6817	341.051	15.3984	171.747	31.3927				404227	3534.37	46.679	399.182	18.3464	443.437	72.5276				504318	1062.43	16.6381	333.678	15.2621	47.7479	5.5593
		104229	2298.54	31.8688	423.984	20.3722	80.0181	8.9962				204198	1224.13	17.4989	240.377	10.9027	77.6585	11.0261				3040468	1685.23	25.3362	300.077	13.2082	240.757	51.5596				404228	451.95	7.041	130.49	5.87	85.5346	13.7843				504319	1140.32	16.3412	237.892	10.8298	84.5825	12.1306
		104230	2021.63	27.1738	346.839	15.5874	91.7821	17.7737				204199	1264.25	18.2105	261.211	12.0901	50.0744	6.2159				3040469	1601.78	24.6746	342.066	15.0372	237.508	52.9556				404229	1221.78	17.9381	313.334	14.545	156.788	23.1268				504320	846.628	12.6917	188.474	8.4358	58.5293	7.1659
		104231	1991.3	27.1635	318.74	14.3823	80.1312	10.8815				204200	1720.98	24.5263	301.474	13.3959	70.9753	7.0784				3040470	2017.65	29.5738	345.49	15.5814	196.107	37.7217				404230	1717.51	25.1558	469.639	21.904	131.75	18.5525				504321	1321.33	18.8062	266.017	12.234	68.8518	8.8278
		104232	1544.78	21.6391	317.011	14.3857	84.6499	15.6627			V22	204201	1366.92	19.71	282.617	12.603	47.7428	5.4262				3040471	2216.34	32.3019	398.179	18.169	115.308	22.0954				404231	1667.41	23.265	313.564	14.8992	261.741	47.5631				504322	1041.1	15.0696	225.839	10.253	53.1089	8.4053
		104233	1653.32	23.3996	328.072	14.8458	111.786	16.3738		1.9018	total dry weight	204202	1392.45	20.0716	280.957	12.5254	42.6874	5.3367				3040472	1688.58	25.5841	444.235	20.4054	160.066	28.5823				404232	801.843	12.0198	210.198	9.9126	37.6896	6.7933				504323	741.302	11.5261	252.103	11.6457	58.5756	8.3225
		104234	1373.91	20.38	338.434	15.6748	51.6109	5.4892		0.6457	part1	204203	1390.51	19.6614	295.471	13.4789	41.0214	5.3857				3040473	1986.94	29.2601	393.856	17.989	134.716	21.8637				404233	2413.87	33.8135	528.607	25.1181	97.1077	11.1185				504324	490.408	7.4528	103.821	4.6032	55.8835	8.2949
		104235	1366.18	19.5088	317.752	14.4383	68.6082	14.2467		1.2561	part2	204204	1463.89	20.7747	313.367	14.2116	41.0713	5.0356				3040474	2008.69	29.388	402.619	18.4082	112.573	21.1396				404234	3209.59	44.4232	663.741	31.6398	137.433	17.473				504325	986.752	14.2857	191.541	8.7784	58.902	8.8688
		104236	1449.55	20.9653	359.825	17.3752	45.2546	5.8371				204205	1355.39	19.2998	276.159	12.2351	38.769	5.3819				3040475	1834.41	27.5217	402.745	18.1412	196.958	36.2578				404235	3189.15	44.2993	726.686	34.9331	159.023	19.4585				504326	664.627	9.3829	117.384	5.3123	48.6388	7.8123
		104237	4669.77	64.7783	1131.03	55.2133	179.474	22.8402				204206	421.17	6.5845	112.146	4.9415	13.7035	1.8834				3040476	2217.1	31.5379	372.856	17.3328	93.0099	15.2134				404236	2896.83	39.1536	457.222	21.9436	342.26	53.3698				504327	900.882	13.2085	196.85	9.003	52.9247	8.3568
		104238	1125.68	16.4383	242.533	10.9768	160.135	28.7344				204207	1148.28	16.4883	294.089	13.5067	106.242	21.8321				3040477	1962.19	29.5351	504.699	23.3747	141.432	26.6078				404237	3161.15	42.8515	481.295	23.2845	392.577	59.8871				504328	839.238	12.0676	175.408	8.031	43.8586	8.1909
		104239	1213.8	17.276	216.882	9.7656	147.331	28.432				204208	1497.01	21.0802	309.061	14.0427	110.729	21.3871				3040478	1894.56	28.9343	512.353	23.8428	143.813	24.5943				404238	3741.16	50.963	579.517	27.0588	330.264	50.2883				504329	899.949	13.1935	193.953	8.6772	46.7359	5.7328
		104240	1134.45	16.3065	240.114	10.8891	156.744	26.2516				204209	1127.33	15.9259	250.91	11.4419	120.182	28.0966				3040479	2189.62	32.5043	482.414	22.2524	105.245	16.7982				404239	2492.18	35.1789	485.515	22.7706	191.829	23.8805				504330	730.735	10.991	179.423	7.9048	80.4976	12.7925
		104241	1083.66	16.1959	258.045	11.8486	152.137	27.6609				204210	1397.66	19.7691	214.685	9.5312	134.303	28.8466				3040480	1396.03	21.775	355.704	16.694	22.6003	3.3181				404240	1139.31	17.4879	412.373	18.475	61.8214	9.0665				504331	607.571	9.3585	202.889	9.0455	51.2329	6.3747
		104242	1143.88	16.2001	230.363	10.6815	146.865	32.3112				204211	1288.87	18.3677	221.189	10.0483	91.2982	19.0098				3040481	1356.52	21.2606	308.126	14.4198	14.1802	1.1798				404241	1678.69	23.9165	384.538	17.4547	159.623	30.3915				504332	1264.84	18.1282	267.985	12.2258	39.6654	5.9653
		104243	650.349	9.7122	130.315	5.8804	117.048	25.4915				204212	1194.15	16.9701	214.703	9.6645	96.9544	14.6672				3040482	863.048	12.4818	84.3604	3.7651	311.789	62.8928				404242	2709.07	39.2568	722.804	32.5038	207.317	34.5668				504333	1020.65	14.7978	221.873	10.1082	40.6262	6.1724
		104244	483.412	7.3037	99.306	4.7712	93.6766	23.6874				204213	958.203	13.8282	197.505	8.96	91.2078	19.6186				3040483	669.382	9.5082	53.2941	2.3467	297.929	58.3011				404243	1825.97	26.208	478.377	21.7783	116.909	17.62				504334	947.155	13.9687	208.24	9.4869	60.562	8.6278
		104245	28.3311	0.4214	2.883	0.1377	31.1224	7.3124				204214	1058.48	15.3088	202.026	8.9594	130.293	23.4041				3040484	1248.77	17.9829	131.545	5.8863	321.368	60.4367				404244	2904.92	41.4182	614.935	27.8572	346.764	63.6101				504335	755.472	11.6964	260.431	11.8435	43.6541	4.8668
		104246	134.769	2.2902	32.1199	1.3943	97.8682	20.4835				204215	1235.63	17.3902	245.519	11.1711	82.0031	17.3355				3040485	1208.45	16.9688	101.714	4.5925	301.872	52.281				404245	3203.15	44.5716	759.274	35.399	115.529	13.6958				504336	697.921	10.5933	158.912	7.3836	44.4298	5.6185
		104247	1233.52	17.202	268.562	12.244	116.336	22.2826				204216	1577.93	22.2028	287.15	12.8904	84.2551	16.4627				3040486	1135.71	16.0629	95.153	4.2791	322.125	55.3246				404246	3964.25	55.536	1029.42	48.1559	173.368	23.234				504337	1271.04	18.1262	261.526	11.8701	63.7329	9.7178
		104248	1169.77	16.8703	234.282	10.4983	129.831	20.141				204217	1142.66	16.38	250.152	11.4736	83.7649	14.2443				3040487	566.723	8.3648	58.1715	2.5604	268.347	49.5441				404247	4306.77	59.5169	843.467	38.7377	233.521	35.4319				504338	715.475	10.806	164.072	7.7111	29.5742	3.1122
		104249	810.002	11.8147	153.692	6.8549	122.379	21.1699				204218	1404.57	19.8978	265.247	12.2314	96.3551	20.9626				3040488	849.713	12.094	68.3287	3.0439	305.658	60.6002				404248	3683.04	50.8947	613.163	27.9808	271.791	47.7987				504339	755.638	12.387	238.643	11.0793	8.0225	0.732
		104250	738.925	10.7077	109.808	4.7772	188.708	34.894				204219	1151.12	16.3591	260.317	11.9696	57.9929	12.9279				3040489	947.942	13.4141	84.9231	3.8431	301.718	55.8196				404249	3314.8	44.2064	364.94	16.9031	418.606	81.7361				504340	1202.15	18.9896	365.647	17.0693	4.6829	0.4639
		104251	1359.71	18.8405	234.227	10.6606	138.35	26.0027				204220	1072.72	15.2575	208.639	9.4399	53.9327	11.2688				3040490	969.885	13.846	136.338	6.3235	250.741	45.215				404250	3016.41	43.0017	724.484	33.405	293.394	49.4094				504341	1024.56	16.4636	301.535	14.0277	20.0434	2.2537
		104252	1052.8	15.0329	192.379	8.737	114.96	17.1963				204221	1534.14	21.8534	309.698	14.1114	67.0987	10.9119				3040491	1502.06	21.6936	162.214	7.3151	207.672	33.3032				404251	1301.37	17.8035	193.358	9.0229	223.042	44.9165				504342	1246.08	20.516	348.128	16.1592	15.7783	1.6596
		104253	950.16	13.7964	188.639	8.7609	146.717	22.4475				204222	819.703	12.0991	173.175	7.944	21.53	2.4085				3040492	1873.77	27.0552	256.813	11.6297	154.244	28.993			N32	404252	1807.82	26.4059	290.801	13.2917	190.81	38.3526				504343	1374.17	21.9738	419.498	19.7174	27.8239	2.8607
		104254	1492.97	20.8477	331.447	15.483	99.8826	17.3484				204223	782.356	12.0119	172.204	8.2289	156.075	27.5007				3040493	1719.04	25.1319	245.407	11.0129	220.468	40.9971		1.7157	total dry weight	404253	1362.86	20.227	345.648	16.1661	96.2895	18.359				504344	1312.51	19.763	408.384	19.1109	60.4151	6.9744
		104255	1606.26	23.1677	380.456	17.1373	138.767	24.3756				204224	98.4684	1.6378	27.8241	1.4313	71.588	16.6641				3040494	2106.55	30.3411	322.96	14.9459	240.964	39.1278		0.8361	part1	404254	2215.87	32.6047	520.412	24.3743	140.373	22.1893				504345	773.46	12.3757	322.885	15.3231	37.6435	3.9058
		104256	1206.62	17.7756	276.646	12.6397	128.175	24.2615				204225	221.637	3.5789	51.4314	2.7478	118.677	22.4002				3040495	1638.21	23.6537	260.167	12.0136	272.324	47.929		0.8796	part2	404255	2566	37.0397	509.9	23.9392	141.203	21.1451				504346	653.433	10.1331	225.133	10.5794	19.6754	1.936
		104257	536.399	8.3263	141.842	6.4857	107.552	20.7134				204226	807.705	12.2597	156.704	7.3866	95.5026	15.0387				3040496	1801.41	26.4656	376.748	17.751	257.214	40.9505				404256	2906.36	42.1813	619.917	29.4042	176.505	29.5132				504347	857.854	13.8099	295.592	14.2687	4.1854	0.4122
		104258	783.333	11.5029	199.997	9.224	75.4073	12.9855				204227	1180.16	17.4224	221.941	10.5391	75.5557	12.0802				3040497	1489.7	22.1231	230.764	10.3387	355.524	73.6041				404257	3225.79	46.6104	608.742	28.9393	225.368	34.5076				504348	901.664	13.0955	150.765	6.8325	32.5706	3.9994
		104259	960.973	13.8201	191.805	8.639	136.054	24.2368				204228	1553.01	22.262	237.3	11.0189	92.1608	15.0357				3040498	2762.26	39.9097	450.812	20.9773	345.993	49.8504				404258	2577.93	37.8085	545.489	25.6462	153.23	24.5921				504349	919.974	14.739	368.156	16.8543	65.7794	9.7234
		104260	793.32	11.6369	176.115	8.1791	118.507	22.5646				204229	1515.7	22.2848	242.326	11.3363	116.287	16.6305				3040499	2205.39	31.3358	312.003	14.5811	260.478	39.879				404259	1765.1	24.3119	180.063	8.3804	242.574	48.2269				504350	857.488	14.1048	256.793	11.5577	18.7649	2.3227
		104261	1129.96	16.2572	241.648	11.3648	99.3073	15.279				204230	1224.94	17.9713	230.299	10.9688	119.451	16.0033				3040500	1445.85	20.9472	186.257	8.1962	217.864	39.2982				404260	2588.31	35.9233	299.523	14.33	351.232	46.6149				504351	956.232	13.4881	172.255	7.422	63.6634	8.2735
		104262	1699.56	23.5076	290.564	13.4421	104.597	15.8718				204231	1421.49	20.5262	252.638	12.0356	122.911	17.1757				3040501	1871.03	26.8138	216.754	9.4177	174.832	32.114				404261	2445.45	36.0744	512.918	23.9417	223.62	41.8924				504352	1123.7	15.6983	177.356	8.0943	44.7255	5.9183
		104263	778.899	11.4808	174.726	8.2391	102.652	16.0622				204232	897.011	13.2266	195.892	8.6046	120.379	21.0212				3040502	2270.32	32.0706	274.177	12.3069	131.16	21.5158				404262	2639.5	37.1383	343.471	16.1191	294.988	23.9353				504353	938.697	13.3399	175.173	7.9931	61.255	7.7256
		104264	1357.06	19.1187	273.12	12.6155	135.938	21.0695				204233	1597.97	22.3372	242.212	12.0115	115.493	14.98				3040503	1544.54	22.4945	262.714	12.2923	105.814	12.6377				404263	518.432	8.2036	109.43	4.9291	83.822	15.8021				504354	1354.05	18.5196	247.922	11.3627	56.5145	9.1898
		104265	1143.98	16.4189	211.325	10.0122	130.433	18.8247				204234	1589.32	22.522	263.721	12.5896	71.0358	10.6874				3040504	1943.31	27.1435	258.38	11.9471	114.21	15.0241				404264	1231.98	18.1597	247.224	11.2181	118.867	23.9426				504355	783.202	12.1118	224.347	10.2237	78.6021	10.8326
		104266	1235.37	17.5489	243.398	11.253	111.738	16.8597				204235	718.952	10.8668	140.145	6.4489	88.2276	12.2656				3040505	1741.11	24.9296	247.79	11.1142	160.547	26.4478				404265	1661.98	24.0922	378.723	17.7394	75.4038	11.0102				504356	1040.24	14.7541	214.236	9.6853	46.8714	7.0646
		104267	1052.99	14.9949	222.766	10.2188	117.658	19.9984				204236	1171.57	17.0083	180.933	8.6008	103.647	15.61				3040506	2038.11	29.5344	282.043	12.897	100.633	14.2645				404266	2680.72	38.138	564.612	26.3323	87.4264	12.8171				504357	1177.83	17.4226	271.516	12.5891	95.5107	11.6212
		104268	993.654	14.2299	195.766	9.1807	111.769	16.0989				204237	1616.63	23.0006	247.926	11.7305	103.895	14.5584				3040507	1904.92	27.6757	302.014	13.994	63.8809	6.8013				404267	3512.82	50.7337	737.263	34.1421	157.875	25.3072				504358	695.546	10.687	192.3	8.5329	54.3396	7.3016
		104269	1706.87	23.7736	344.883	16.117	104.482	14.7754				204238	815.632	12.1688	222.3	10.1959	98.3621	19.0648				3040508	1704.72	24.862	267.387	12.4458	55.0519	6.1997				404268	3097.68	44.8663	579.944	26.4946	177.513	30.657				504359	827.243	12.8791	209.004	9.6898	49.4388	6.5814
		104270	1148.96	16.2373	231.75	10.7938	151.133	24.4065				204239	977.857	14.5681	195.035	8.813	94.5922	14.4994				3040509	1426.65	20.5769	233.377	10.8643	96.3992	12.6067				404269	2006.64	28.8893	292.284	13.0394	173.449	32.4164				504360	1206.98	16.7248	183.345	8.0789	57.9746	7.1947
		104271	1125.14	16.3029	231.763	10.4744	145.521	22.9832				204240	1652.71	23.7763	284.082	13.5209	67.1224	9.3278				3040510	1572.26	23.0747	252.138	11.7619	44.8409	6.7875				404270	1019.82	14.1248	88.3254	4.0375	167.96	35.1541				504361	1108.31	15.9066	246.02	11.4223	70.0758	10.091
		104272	915.471	13.0781	189.911	8.7593	136.41	23.8061				204241	379.753	6.1415	121.168	5.7098	105.521	21.254				3040511	1989.16	28.4148	341.106	15.9234	72.3575	10.5723				404271	1501.23	22.8085	319.777	14.1638	180.992	36.0767				504362	776.408	11.2807	153.072	6.5922	50.4919	5.8831
		104273	1644.02	23.0809	320.14	14.5891	126.663	21.9231				204242	799.769	12.2785	164.9	7.8394	140.22	23.0423		2007-08-29	N11	3050001	867.224	12.3468	153.497	7.0922	35.2187	4.7744				404272	2033.31	29.6766	392.387	17.9664	194.645	37.1944				504363	764.615	11.2756	210.657	9.3478	30.0342	4.5505
		104274	1539.81	22.0797	380.891	18.2183	70.8135	9.0965				204243	65.8711	1.142	18.1523	0.8289	51.5334	11.2555				3050002	1212.52	16.3258	189.545	8.5487	60.9627	8.7968				404273	2035.35	29.6946	390.881	17.9353	178.469	32.5922				504364	1371.12	19.1592	255.477	11.6672	60.6617	9.3503
		104275	745.119	10.7015	160.748	7.4899	145.949	27.1507				204244	1161.38	17.2566	268.53	13.2226	119.704	16.6016				3050003	1004.3	13.6948	129.495	6.1229	51.9812	9.2485				404274	2167.31	30.6657	311.644	14.278	128.005	23.6465				504365	1041.49	15.0516	215.775	9.6531	51.2264	6.6591
		104276	1594.99	22.1667	370.668	17.6949	96.0833	16.9678				204245	947.801	13.9718	209.96	10.2269	95.6896	13.5788				3050004	982.049	13.441	153.164	6.8136	58.2254	7.7585				404275	1808.1	26.9772	486.148	22.1754	146.219	23.6734				504366	1301.97	18.4109	243.991	11.5334	56.5327	8.191
		104277	2145.86	29.1671	450.814	21.3257	143.931	27.5607				204246	790.358	11.9533	165.568	8.2039	101.857	14.1057				3050005	882.405	12.438	125.429	5.4228	51.1107	7.4567				404276	2011.61	29.8935	424.896	19.3272	146.672	26.0238				504367	1344.96	19.1833	281.248	13.1514	64.294	9.4228
		104278	1122.89	15.7942	201.656	9.2926	139.489	24.1569				204247	1192.92	17.1758	176.708	8.5186	103.02	14.1035				3050006	1004.67	14.2171	151.816	6.6777	42.6494	4.7811				404277	2375.12	34.6154	613.915	29.0348	165.807	25.843				504368	1105.39	15.4814	212.226	9.8195	45.098	8.1242
		104279	1158.24	16.159	210.993	9.5803	146.788	26.615				204248	1348.76	19.2076	211.472	10.4652	100.086	12.3469				3050007	1064.11	14.5458	151.771	6.7401	112.21	24.1604				404278	2448.62	35.6866	636.327	29.8812	106.749	16.5826				504369	765.797	11.1533	165.124	7.3119	45.7942	6.6233
		104280	813.166	11.7032	167.58	7.5276	86.975	16.9952				204249	950.611	13.5922	121.979	5.6816	141.179	22.2718				3050008	1651.91	22.3503	248.366	11.1052	60.0792	7.262				404279	1646.18	24.5064	446.236	20.5017	99.4936	14.9851				504370	1603.86	22.5466	365.091	17.0364	40.6478	7.8314
		104281	458.143	6.7515	125.293	6.2522	129.938	18.3596				204250	1475.89	20.7233	255.222	11.4522	123.873	24.4183				3050009	1068.82	14.9125	147.683	6.6772	48.6968	5.0437				404280	2649.99	39.0477	817.352	38.7724	83.7589	11.868				504371	881.341	12.9126	212.907	9.7739	48.5967	6.4675
		104282	1047.48	14.8978	188.186	9.1001	83.5536	10.8544				204251	1697.97	23.3058	255.558	11.6116	96.8231	20.5793				3050010	1290.37	17.6548	174.236	7.8959	39.9589	5.2982				404281	1273.06	19.1153	384.771	17.9808	97.1271	15.722				504372	1729.29	26.0519	421.721	20.3166	89.1193	10.5106
		104283	1614.04	22.6818	290.753	13.7138	123.196	15.4386				204252	1033.06	14.4373	241.23	11.3875	125.64	31.6416				3050011	1304.66	17.8729	196.53	9.1776	45.8434	5.7256				404282	1805.47	27.0054	593.785	28.0481	106.854	13.7489			W32	504373	653.937	10.5793	281.289	13.4414	79.3793	14.229
		104284	1319.1	18.982	260.304	12.0222	113.929	15.532				204253	1164.81	16.504	265.13	12.799	122.261	24.335				3050012	1549.47	20.9768	221.463	10.0524	57.8464	6.9768				404283	882.928	13.117	182.316	8.2707	74.849	10.3092				504374	871.253	12.3441	192.321	9.0106	66.5926	13.6098
		104285	1682.21	23.6373	301.794	13.7178	105.264	14.3693				204254	1256.72	18.9141	387.789	17.6503	166.704	32.7003				3050013	918.726	14.3655	131.69	6.9614	70.9473	13.3074				404284	1104.12	16.9077	288.76	13.0411	49.0255	5.7685				504375	892.921	13.4376	207.834	9.6299	38.5271	4.7512
		104286	1899.84	27.2284	425.671	19.5115	91.2393	13.5666			V23	204255	1608.47	24.2072	428.62	20.8773	134.475	25.1974				3050014	1115.81	15.0499	273.567	12.254	82.7482	14.0353				404285	1137.06	17.5041	379.318	17.2877	265.986	52.7481				504376	1055.18	15.7023	294.037	13.6313	53.2306	7.7639
	V22	104287	927.485	13.2036	214.471	9.6068	57.3524	6.6604		2.1105	total dry weight	204256	1496.01	22.6832	442.989	21.4386	97.5237	18.4621				3050015	1256	17.3553	273.533	12.5192	45.8508	7.0249				404286	246.889	3.9692	65.3712	3.0111	146.799	33.0054				504377	744.213	12.232	305.979	14.1042	33.843	4.3147
		104288	1417.91	19.6385	311.08	14.3134	52.4437	7.543		0.7134	part1	204257	2190.99	33.0061	589.454	28.7898	101.079	14.8143				3050016	846.409	14.5359	154.841	6.9467	48.7837	5.4547				404287	2047.89	31.0077	596.692	27.5711	117.665	14.2481				504378	832.613	12.8555	252.478	11.7405	29.992	4.9029
		104289	1142.84	15.9156	241.538	11.2086	67.9711	9.4339		1.3971	part2	204258	2082.43	30.7705	424.699	20.4649	129.549	21.402				3050017	1243.67	17.7813	232.337	10.8271	50.8665	7.0364				404288	827.731	13.2772	316.945	14.5111	40.7202	4.6961				504379	772.637	11.6062	225.108	10.3818	42.5813	7.9235
		104290	1240.6	17.064	280.565	13.1157	56.5341	8.0274				204259	1939.7	29.0428	469.104	22.9512	59.1214	8.169				3050018	1364.92	19.1239	263.538	12.1514	37.3071	5.1332				404289	2055.52	30.4304	480.513	22.202	127.128	17.2384				504380	1171.83	16.8037	291.911	13.8604	45.9599	9.2519
		104291	1106.79	15.2086	228.602	11.1125	58.3453	7.6085				204260	2441.69	37.7386	594.852	28.542	29.8581	3.8624				3050019	935.359	15.6332	203.393	9.6678	59.2709	8.8871				404290	2487.9	36.3681	610.668	28.5868	123.744	16.6845				504381	839.324	12.5179	245.275	11.4912	32.5804	5.0982
		104292	1905.46	25.4141	333.282	15.8663	68.8239	8.9019				204261	1112.94	17.9181	312.704	14.9237	11.5692	1.212				3050020	1335.37	18.6164	237.394	11.134	40.9654	5.5583				404291	2188.79	32.3272	549.958	25.7572	119.598	16.4497				504382	609.129	9.4763	184.625	8.5392	42.4613	7.1924
		104293	864.936	11.9055	162.067	7.265	81.6768	10.9076				204262	1955.47	29.4858	435.926	20.9771	172.576	35.9259				3050021	1151.11	16.4661	173.462	7.9081	58.8814	7.58				404292	2727.57	39.6668	611.542	29.1673	152.202	20.4971				504383	1458.36	20.5948	320.408	14.567	28.7438	4.8205
		104294	1587.49	21.0345	247.33	11.3672	51.8374	6.5898				204263	1850.84	28.0701	454.199	21.7935	234.37	49.5699				3050022	1029.92	15.5499	156.561	7.0218	79.3487	15.4346				404293	2666.49	38.5122	469.666	21.9843	161.122	26.7285				504384	1116.19	16.4526	315.279	14.6506	28.5155	4.5536
		104295	1044.64	14.0988	177.823	8.3672	43.195	5.634				204264	2047.33	30.332	415.47	19.9705	162.021	33.6978				3050023	1362.43	18.5859	260.84	12.9071	64.3764	14.6341				404294	2342.78	34.3889	511.013	23.7256	129.993	21.2982				504385	245.584	4.126	162.906	7.6348	26.2392	3.738
		104296	1177.47	15.8096	221.957	10.3431	57.2978	7.459				204265	1039.6	16.3151	288.64	14.0701	45.3159	7.1435				3050024	1439.14	21.1707	332.749	15.7247	60.273	7.4107				404295	2323.45	34.8837	551.414	25.6121	169.628	29.1759				504386	724.87	10.9892	204.577	9.6052	26.4866	4.2608
		104297	899.381	13.1271	196.517	8.9901	43.8145	5.9557				204266	806.056	12.7241	276.718	13.5708	198.957	39.9973				3050025	1327.79	18.79	292.416	13.8444	66.3125	12.7506				404296	2319.3	34.3889	483.716	22.2745	139.536	23.0842				504387	809.472	11.7055	185.018	8.7001	44.7711	6.6694
		104298	1037.36	14.507	202.078	9.6363	47.6954	6.1215				204267	1459.99	21.7838	374.247	18.1001	269.68	53.4857				3050026	897.853	15.2018	196.408	9.3452	36.4726	5.7173				404297	2416.27	34.8012	453.652	21.2587	125.334	20.0882				504388	1713.79	22.6762	199.338	9.2836	59.2123	7.4997
		104299	1044.98	14.4289	176.9	8.05	74.4955	9.9167				204268	1835.43	27.4832	463.075	22.4226	252.832	46.5811				3050027	1205.37	17.031	253.886	12.1698	60.1357	11.4276				404298	2888.94	42.883	735.946	34.5364	204.324	31.7757				504389	1448.28	19.3362	171.859	7.9144	66.7462	8.2049
		104300	1675.88	22.7076	301.102	14.1407	54.447	7.0439				204269	1666.54	24.2983	316.527	15.1342	305.65	56.3958				3050028	1514.45	22.027	300.792	14.0787	75.433	10.2342				404299	2257.66	32.822	411.067	18.8644	130.976	24.036				504390	1670.38	22.336	198.278	9.1085	40.2553	5.3444
		104301	1210.67	16.6467	265.734	12.2261	49.5129	7.1065				204270	1604.3	23.6545	288.106	13.3899	380.626	66.8202				3050029	756.463	11.4928	177.944	8.1095	81.3733	11.7902				404300	1988.03	28.8636	331.358	15.0915	144.049	25.5945				504391	1081.71	15.6973	243.157	11.1312	42.8686	7.237
		104302	1092.32	15.0944	197.269	9.0212	66.865	10.5767				204271	2047.55	30.5113	489.755	23.5504	256.593	41.2127				3050030	1080.49	16.0898	239.535	11.1226	54.5158	7.1122				404301	2437.39	34.4713	358.947	16.8329	154.171	27.3828				504392	728.146	10.8242	149.81	6.7424	35.2943	4.8783
		104303	1242.14	17.5681	280.775	12.7454	64.9448	10.3541				204272	2225.58	33.3293	564.371	27.6019	185.337	23.1155				3050031	1110.82	16.4306	200.184	9.0019	75.346	10.3846				404302	3528.42	50.8823	664.899	31.3439	158.46	24.6109				504393	886.177	13.4976	202.806	9.2929	46.0586	6.9539
		104304	1160.02	16.715	296.544	13.4977	52.5562	8.0091				204273	2144.04	33.3165	612.488	29.4476	75.9439	7.8334				3050032	834.147	12.3368	177.672	7.9475	80.3643	13.6257				404303	1905.85	27.5441	261.913	11.8265	200.94	41.903				504394	859.944	12.8995	186.258	8.6742	23.9575	3.5271
		104305	1223.2	17.3521	269.002	11.7537	85.0654	13.0049				204274	331.602	5.051	78.0576	3.7886	29.363	3.8334				3050033	1321.03	19.4744	265.143	12.4727	68.2629	9.0315				404304	2122.85	30.9252	311.485	14.0758	235.14	17.4114				504395	982.86	13.9454	164.029	7.5433	37.839	6.7229
		104306	864.267	12.8555	245.642	10.6416	55.1196	8.3401				204275	983.532	14.6432	300.972	14.5514	158.562	25.1235				3050034	1322.62	18.76	244.017	11.3957	82.5505	15.8064			N33	404305	2871.37	39.2549	479.199	22.0961	450	84.6403				504396	663.552	9.4818	122.007	5.69	20.353	4.251
		104307	1181.4	16.5789	266.757	11.9758	58.6912	8.7208				204276	1296.25	19.2667	350.252	16.8664	141.529	17.8783				3050035	1278.37	17.8557	217.302	10.688	87.6423	13.7042				404306	4718.89	64.9366	1222.24	57.8331	138.439	16.6718				504397	854.657	12.0738	222.882	10.9321	29.384	5.5223
		104308	573.824	8.4584	157.62	7.0743	41.9151	7.0353				204277	988.765	14.7917	255.553	12.1602	284.227	59.9995				3050036	1983.62	27.7523	270.171	12.2773	60.8264	6.8852				404307	3769.97	51.754	978.356	46.3341	141.973	16.8587				504398	1308.26	17.547	166.338	7.3629	42.0615	5.2883
		104309	833.644	12.2502	224.632	10.2732	105.681	19.7222				204278	1599.6	22.9926	350.783	16.7533	191.025	31.6669				3050037	1467.82	20.6916	218.04	10.1777	46.7426	5.2832				404308	3668.94	51.1681	977.679	45.9959	227.802	29.5876				504399	1453.64	19.154	217.33	9.9387	58.4446	8.3647
		104310	104.924	1.6703	36.2952	1.7869	48.4735	11.9507				204279	1635.26	24.8697	450.308	21.5414	174.472	28.2498				3050038	1567.78	22.2516	204.013	8.9999	68.7887	7.5637				404309	3850.4	52.7305	913.523	43.2903	216.53	28.4799				504400	690.597	9.9802	186.717	8.7729	45.2323	7.4172
		104311	236.167	3.6499	67.0898	3.4305	80.3583	16.0643				204280	1479.37	22.1704	522.404	26.3215	99.1047	18.2153				3050039	1295.61	18.8165	204.433	9.3876	37.7778	3.9409				404310	3497.68	48.6292	856.019	39.9082	348.874	54.2385				504401	963.455	12.9592	180.758	8.5757	52.915	7.5824
		104312	860.655	12.5028	204.413	9.2217	64.6665	10.785				204281	2169.94	30.6065	436.218	20.454	142.437	21.0719				3050040	1951.88	27.6174	323.078	14.4172	79.9287	9.5982				404311	2995.91	41.6961	646.299	30.1003	277.663	45.0931				504402	1456.63	20.2516	202.229	9.1511	33.897	4.4542
		104313	1257.53	17.7679	289.512	13.1574	51.1601	8.6633				204282	1797.75	26.1841	442.618	21.9204	27.8772	2.7979				3050041	1422.92	20.4119	248.224	11.4941	50.4054	5.5189				404312	2748.83	37.9855	594.658	27.5074	273.038	42.125				504403	1097.42	14.8122	216.03	10.4988	38.2658	7.8303
		104314	1654.82	22.7035	309.546	13.7563	62.4037	10.7828				204283	1796.95	26.0878	446.698	21.8448	73.4847	10.3733				3050042	1479.97	21.2565	199.743	8.9065	61.7288	6.1574				404313	1574.63	21.2875	238.359	10.9353	561.527	120.011				504404	1448.48	20.414	326.77	15.2415	63.4991	9.7827
		104315	1615.06	22.7268	316.103	14.1526	78.7402	11.9266				204284	2165.78	31.2086	532.475	26.136	60.5881	7.226				3050043	1865.67	26.6535	268.913	12.106	57.9236	6.5661				404314	1532.52	20.7016	229.79	10.5971	442.196	94.8652				504405	1429.9	19.6138	220.649	10.2755	40.8786	6.7406
		104316	1305.25	18.3277	300.415	13.6938	80.8826	11.4767				204285	2227.92	31.4271	488.197	23.6738	77.0206	10.5911				3050044	1499.67	21.7181	251.978	11.6355	63.8599	6.651				404315	2995.21	40.0361	478.748	22.998	832.817	158.412				504406	805.689	11.2528	146.297	6.7365	41.7019	7.6266
		104317	1514.68	20.9333	329.555	15.0256	83.225	12.3175				204286	2614.48	37.7617	599.131	28.7622	7.9244	0.7151				3050045	1500.62	21.8257	254.905	11.7573	41.0527	4.0725				404316	526.978	8.4955	272.298	12.2881	19.3707	3.2241				504407	1547.05	20.6535	206.529	9.3869	46.0143	7.5445
		104318	955.816	13.4889	255.532	10.7423	81.5106	15.0753				204287	1698.27	24.5591	357.755	16.9692	180.05	38.7295				3050046	1691.04	26.2484	406.371	18.7865	0.578	0.0483				404317	1282.53	19.2369	469.841	21.3069	53.693	6.9527				504408	973.373	13.5202	173.874	7.9634	49.0363	9.8878
		104319	1702.72	22.7802	315.954	14.9955	78.2022	10.7429				204288	1151.05	16.8086	247.248	11.631	261.942	65.8805				3050047	2711.12	40.1409	618.95	29.1285	14.1137	1.3585				404318	2302.28	33.0054	734.584	33.8205	91.3439	11.0798				504409	1411.6	19.0387	176.403	8.0865	40.6667	5.5587
		104320	1693.51	22.9686	344.011	15.7172	48.0996	7.6644				204289	1858.85	26.9474	368.824	17.4307	271.15	61.001				3050048	2756.5	39.7342	558.982	26.3694	10.4632	1.0866				404319	2240.76	31.2477	647.201	29.9875	111.484	14.4227				504410	1311.56	19.2886	287.396	13.201	54.4766	7.2629
		104321	766.084	11.0823	182.812	8.051	59.7404	8.7963				204290	1793.51	26.0071	369.728	17.4496	232.371	51.5591			N12	3050049	3097.5	41.7352	569.647	26.1453	2.1771	0.2033				404320	2375.6	33.6889	820.728	38.1045	137.872	18.7728				504411	1186.94	16.7637	218.409	10.2092	52.3876	8.435
		104322	1248.37	17.3457	236.019	10.7375	70.1809	11.1947				204291	2070.84	29.1984	376.585	17.8995	196.575	38.4273				3050050	713.815	11.0589	175.459	7.8266	18.2667	2.5052				404321	2778.94	39.5478	964.6	44.7558	194.095	23.9092				504412	1227.88	18.4386	388.871	18.5384	34.1903	5.574
		104323	1722.61	23.4568	323.407	14.6447	70.3488	10.4406				204292	2618.96	36.3277	485.052	23.6181	152.909	26.6815				3050051	622.599	9.9532	196.581	8.6355	18.1328	1.7867				404322	2137.42	30.8571	787.127	36.0752	198.237	31.4276				504413	1276.42	18.2767	294.582	13.9444	34.9249	6.7233
		104324	869.102	12.4101	289.98	12.7288	66.6027	13.6723				204293	2660.23	37.0569	511.596	25.7206	148.916	19.0511				3050052	743.764	11.2515	205.004	9.5276	43.0561	4.9602				404323	2708.31	39.4502	1153.01	53.7746	374.196	60.3509				504414	828.16	12.8255	242.576	11.0073	36.0459	5.8418
		104325	1041.96	14.8571	254.413	11.0024	64.05	10.3982				204294	2206.49	30.7706	361.903	17.771	113.76	20.162				3050053	809.795	12.6233	213.093	9.6132	15.2132	1.6872				404324	2740.22	39.9384	1434.22	68.4302	365.07	51.6885				504415	1358.81	20.3835	351.914	16.1709	50.399	7.8934
		104326	1761.06	24.2479	370.572	16.88	45.4498	6.6895				204295	1797.3	25.6436	404.405	20.2571	48.4213	10.0036				3050054	688.116	10.9426	210.774	9.7223	11.9681	1.2141				404325	2578.77	36.6184	746.311	34.2715	255.991	41.715				504416	1087.84	16.3095	323.063	14.8767	57.302	9.8057
		104327	404.649	6.2633	158.058	7.1283	71.45	15.2423				204296	2458.87	33.9286	457.367	22.6809	76.841	11.7265				3050055	968.097	15.0592	244.987	11.3495	8.7633	0.8704				404326	2994.31	41.7938	803.025	37.3153	252.821	41.3928				504417	1210.07	17.8162	303.493	13.8558	53.1796	9.3561
		104328	852.199	12.522	215.105	9.787	94.9452	16.5248			V31	204297	1633.73	23.4601	476.491	23.7535	177.103	30.5762				3050056	876.297	12.875	242.174	11.1324	63.9417	8.8731				404327	2665.6	37.009	723.873	34.046	161.064	25.1283				504418	1383.44	21.6195	488.033	22.8162	37.081	4.4721
		104329	70.1894	1.1647	23.6788	1.0348	34.8942	8.0719		7.4981	total dry weight	204298	1531.98	22.2432	451.557	22.7479	182.691	25.682				3050057	785.184	11.7669	190.102	8.9548	7.2199	1.1714				404328	2575.27	36.2278	619.577	28.4092	352.289	67.9491				504419	507.639	8.4424	236.835	11.2915	33.0028	6.1506
		104330	1237.52	17.5988	350.285	16.5075	81.054	11.9059		2.4074	part1	204299	1956.22	27.2829	520.457	25.9314	192.455	28.3078				3050058	1076.54	16.065	236.55	10.8358	23.4092	2.8431				404329	2117.81	29.6853	527.119	24.5762	273.054	50.7368				504420	739.519	11.6264	246.088	11.7746	25.4594	5.6278
		104331	1009.94	14.2489	273.883	12.7676	64.7931	9.738		5.0907	part2	204300	1461.88	21.3007	482.562	24.0796	85.1191	12.9439				3050059	890.898	13.226	171.079	7.6403	17.7204	2.1572				404330	1901.14	25.9746	281.882	12.7391	442.826	89.703				504421	647.01	9.9345	218.358	10.2609	41.3187	6.377
		104332	842.171	12.1904	215.976	10.242	68.9691	10.1159				204301	1792.24	26.1941	522.642	26.1922	21.6396	2.883				3050060	1035.99	15.1814	200.969	9.7935	29.341	4.8548				404331	2445.42	33.2007	410.871	19.165	402.385	66.6407				504422	873.53	13.4644	278.115	13.0757	38.9061	5.1214
		104333	1271.12	17.5165	230.507	10.6349	69.757	10.1143				204302	1650.27	23.8279	432.619	21.6448	277.109	53.7095				3050061	1090.1	15.2537	190.293	8.6172	36.7705	4.6321				404332	2867.97	39.6455	610.669	28.1838	345.637	52.0443				504423	1290.21	19.4395	352.871	16.3222	38.7222	5.9827
		104334	1437.18	19.5885	275.856	13.0651	67.7697	8.8546				204303	1926.62	27.4007	448.332	22.0262	159.669	28.7686				3050062	1023	14.3426	164.498	7.613	28.8928	3.8362				404333	2442.02	34.2748	714.74	34.046	302.905	42.2444				504424	1499.3	21.7252	343.813	15.8879	33.3325	6.1801
		104335	1012.93	13.8618	159.116	7.0931	95.5945	15.9722				204304	1836.96	26.2623	550.392	27.513	148.366	25.0486				3050063	998.77	14.1224	173.694	7.813	43.5876	5.9171				404334	2584.67	35.9348	688.694	32.9186	223.535	30.1217				504425	488.056	8.1636	217.054	9.966	31.9794	4.5158
		104336	1668.2	22.8238	311.732	14.2863	78.5023	11.506				204305	1974.68	27.5542	483.635	24.8973	109.664	18.2432				3050064	868.574	12.5828	152.984	7.0522	23.3479	4.0352				404335	1918.55	28.6112	714.063	32.8059	124.494	13.2458				504426	710.054	11.7678	313.611	14.7709	29.6094	3.6596
		104337	1701.62	23.5498	388.15	17.8945	64.6954	9.6464				204306	1976.28	27.6224	477.655	23.388	122.584	20.2048				3050065	834.92	11.9621	164.663	7.6607	38.5372	6.1662				404336	2810.05	39.7431	638.857	29.4239	206.039	26.3142				504427	1130.29	18.0257	463.538	21.8722	11.7067	1.1569
		104338	668.826	9.6822	191.196	8.5075	53.7316	9.8945				204307	2559.81	35.0379	517.095	25.5393	91.6703	14.3569				3050066	1269.57	17.6268	197.184	8.9992	28.1551	3.052				404337	2541.36	36.6184	665.918	30.8894	147.03	16.8192				504428	1822.59	26.2863	403.668	18.5077	42.217	5.6858
		104339	1237.12	17.3632	296.703	14.1165	59.5579	8.6235				204308	2760.68	37.0906	570.784	29.8328	150.446	24.3282				3050067	1380.24	17.2335	232.276	10.6872	25.9697	2.9396				404338	1950.76	28.4159	591.839	27.5074	231.007	34.1971				504429	1726.06	25.5589	383.927	17.5784	25.0051	2.6429
		104340	1354.4	18.871	286.88	13.4889	67.2819	8.7079				204309	3309.82	44.458	660.137	35.5929	122.621	17.2478				3050068	1200.57	17.1297	231.902	10.6021	26.9238	3.8363				404339	2664.1	38.2784	740.335	34.046	227.742	33.3049				504430	1110.28	16.4076	261.42	11.735	59.4709	6.7724
		104341	1209.77	17.6301	367.748	16.8489	61.1132	8.7016				204310	1603.56	21.7615	336.573	17.8742	165.198	49.0901				3050069	1087.98	15.5807	204.192	9.3306	25.3352	3.2359				404340	2537.06	36.9113	854.892	39.6828	260.237	35.4999				504431	587.328	8.7127	127.474	5.6644	42.3042	6.0857
		104342	1413.97	20.1189	358.377	16.4166	63.1616	7.9739				204311	1697.05	23.3517	365.74	19.0923	180.215	44.8026				3050070	817.311	12.2083	201.155	9.3416	36.6675	4.3424				404341	2419.12	34.2748	672.57	31.4531	214.44	28.8074				504432	621.447	9.6353	196.507	8.9487	37.5299	5.5966
		104343	1390.8	19.4317	285.764	12.8655	55.2228	7.5622				204312	2133.5	28.3913	404.301	22.0887	145.47	30.3303				3050071	872.697	12.1799	158.434	7.2235	7.959	1.0019				404342	2222.95	31.6383	562.524	26.0418	349.972	59.7741				504433	877.295	13.0213	256.185	11.9765	28.8412	4.76
		104344	1587.72	21.8234	307.106	14.6822	88.028	11.4013				204313	1603.65	21.5468	318.095	17.425	122.428	31.5936				3050072	1005.83	14.1703	203.39	9.1841	37.3883	6.6272				404343	2925.89	41.5985	812.046	37.5408	287.419	44.8557				504434	996.138	14.1523	228.63	10.5727	47.9654	7.928
		104345	1127.94	15.9775	228.049	10.4248	59.0222	7.5411				204314	1596.6	21.4266	338.77	18.0058	89.1341	23.4288				3050073	836.096	12.427	233.167	10.69	35.4724	5.5936				404344	3079.34	43.6491	813.399	37.2026	278.565	43.4761				504435	1462.91	19.7046	274.69	12.3819	40.9597	6.9349
		104346	1572.12	21.4037	284.149	13.5032	68.3916	8.4486				204315	2111.81	29.595	517.145	25.5482	138.238	20.6331				3050074	1343.92	19.0093	237.061	11.1417	31.3186	4.5199				404345	3383.14	48.3363	1078.14	50.6181	261.455	35.6127				504436	1218.36	17.2413	281.643	12.7113	28.7733	4.1755
		104347	2256.95	30.2112	401.993	18.0495	70.438	10.147				204316	2081.89	29.3966	571.528	28.6379	53.6981	7.4875				3050075	1157.77	16.7064	214.335	10.022	26.0735	2.8486				404346	2006.08	29.49	653.29	29.9875	467.67	91.02				504437	1109.55	15.3211	232.125	10.8099	37.2093	6.1074
		104348	1389.93	19.3242	300.922	13.9357	71.6589	10.0763				204317	2413.2	34.3901	658.335	33.0164	24.2718	2.9966				3050076	1468.94	19.7875	252.329	11.6197	64.047	9.7932				404347	2093.51	30.1735	646.75	29.9875	333.116	59.1078				504438	1314.66	17.5199	243.794	11.7358	21.7693	4.0106
		104349	1203.98	16.9507	248.67	11.4211	64.9351	8.8885				204318	2081.98	29.7612	572.749	29.2561	26.1858	2.7445				3050077	1536.53	21.8456	267.993	12.4279	18.1638	2.0824				404348	3617.52	50.6798	1079.27	51.5199	188.997	22.5068				504439	785.671	11.474	215.496	10.0462	39.431	7.6641
		104350	1728.66	23.9451	360.082	16.8888	121.39	16.5748				204319	2299.98	32.6245	637.708	32.482	18.1475	2.2423				3050078	1184.58	16.8752	223.995	10.2693	26.1501	2.8232				404349	4153.9	57.6129	1049.28	49.4907	267.41	33.3634				504440	652.864	10.2035	218.73	10.3528	30.5758	5.168
		104351	1930.51	26.5735	401.27	18.576	108.026	14.8998				204320	2442.98	35.4248	707.33	36.1064	7.2134	0.7841				3050079	1258.24	17.5099	220.856	10.1641	34.8517	4.6722				404350	3578.21	49.6057	849.141	39.4573	242.984	32.0555				504441	991.968	15.2434	433.309	20.9856	34.7457	6.4458
		104352	1389.35	19.687	334.66	15.3643	70.2152	9.4141				204321	2235.93	33.1064	629.238	31.2818	3.4809	0.4571				3050080	852.818	12.6411	183.724	8.6018	5.4538	0.5185				404351	3583.61	49.801	745.296	34.2715	386.061	56.05				504442	2166.85	31.1728	461.187	21.6039	12.0888	1.1777
		104353	1389.21	19.2126	249.452	11.7247	67.8596	8.7772				204322	1737.88	24.1851	398.043	19.7239	209.252	46.8137				3050081	1034.24	14.8651	205.971	9.4945	48.0807	7.2161				404352	3601.01	49.1174	686.326	32.0168	479.604	72.6377				504443	992.306	14.8769	194.013	9.0658	4.2873	0.4028
		104354	115.984	1.7351	46.128	2.0587	25.7583	5.1129				204323	2253.89	30.9917	506.509	26.2477	158.414	31.3177				3050082	833.295	12.5099	199.863	9.2283	10.6766	1.0768				404353	1319.85	18.4557	249.747	11.499	421.463	84.674				504444	659.523	9.2586	140.418	6.4712	39.5387	5.7648
		104355	246.453	3.6041	67.9047	2.933	43.2794	9.0717				204324	1713.26	23.3481	346.433	18.0376	76.5034	17.4227				3050083	1272.96	17.4353	188.481	8.6591	85.2038	11.1417				404354	1930.15	26.3652	294.51	13.5282	539.952	112.065				504445	1870.65	24.7038	341.909	16.5398	32.9467	5.7206
		104356	189.53	2.7845	61.4605	2.6362	63.5966	12.1566				204325	871.308	12.5189	215.326	11.0516	160.337	48.2001				3050084	880.849	12.2589	161.406	7.3965	55.9312	9.0285				404355	1790.9	24.6075	289.211	13.3027	471.386	83.0329				504446	716.183	11.4361	321.269	15.27	25.2452	3.7831
		104357	90.8465	1.4629	25.0917	0.9847	26.9807	4.9486				204326	701.014	9.9619	189.557	10.6551	153.539	46.0449				3050085	1280.11	17.4704	201.052	9.2092	63.3277	10.1309				404356	1916.65	28.0253	792.652	36.8644	270.464	35.2947				504447	600.129	8.5509	93.191	4.1423	44.8684	6.0836
		104358	341.536	4.9722	107.063	4.6439	86.4928	15.6353				204327	1131.88	15.7456	241.974	12.8285	128.222	31.5858				3050086	1116.13	15.303	150.449	6.8885	67.1467	9.4955				404357	1993.77	29.0018	767.621	35.9625	0	0				504448	1020.42	13.8419	169.401	7.7708	42.7177	6.14
		104359	193.927	2.856	55.7553	2.3256	55.4425	10.0925				204328	1317.06	18.0987	296.704	16.194	153.45	45.3835				3050087	1164.77	16.2812	169.425	7.6582	76.5445	9.9186				404358	2146.32	31.15	811.933	38.3299	268.673	38.8635			W33	504449	1110	17.3943	269.862	12.7422	58.5115	8.2508
		104360	205.826	2.9577	52.9208	2.2941	53.7527	10.9527				204329	1830.51	24.5569	378.072	20.7245	147.109	35.3723				3050088	1154.92	15.9171	197.057	9.0901	60.6919	8.4381				404359	2971.5	42.8679	1061.91	49.8289	352.323	51.3897				504450	1420.44	22.5192	365.239	17.2701	21.6916	2.3715
		104361	124.734	1.7768	28.0084	1.1512	43.1764	9.4396				204330	1205.68	16.5675	257.251	13.932	86.6843	24.8939				3050089	958.775	13.427	141.47	6.5225	64.1813	7.69				404360	2524.35	35.6419	775.514	36.6389	295.46	49.4984				504451	513.687	8.4117	193.385	9.3185	44.7097	11.3798
		104362	333.02	4.9003	97.2782	4.1218	87.8112	15.4203				204331	1010.44	14.1597	174.71	9.1397	94.5755	19.7693				3050090	889.157	12.6484	149.786	6.6403	62.1214	9.0614				404361	2800.94	38.9619	805.28	38.1045	184.246	32.7998				504452	730.973	11.8168	342.576	16.4637	56.3496	13.0345
		104363	384.366	5.6847	99.1195	4.184	99.0366	16.3349				204332	2305.36	31.4841	508.757	26.8419	92.7375	18.4874				3050091	1320.45	18.1203	192.869	8.6637	61.9038	8.8269				404362	2270.67	32.2242	662.197	30.8894	260.157	48.9787				504453	470.902	7.1071	53.4909	2.5392	48.6137	5.9477
		104364	220.259	3.3113	50.9523	2.0767	47.9023	7.8558				204333	1466.8	19.917	273.533	14.1518	71.4568	16.7378				3050092	748.43	10.5857	153.904	7.1202	73.6308	12.0402				404363	2293.57	32.5171	698.391	32.5804	285.052	49.9774				504454	1125.18	16.4549	129.197	5.9492	82.3601	11.6127
		104365	130.076	1.9599	20.9036	0.8213	45.9622	9.0358				204334	1382.82	19.5564	302.154	15.6433	40.7969	11.9407				3050093	1194.23	16.382	198.934	8.8847	97.7154	17.0882				404364	3659.23	51.5587	1102.5	51.9709	354.495	54.4442				504455	1316.1	19.0478	210.418	9.4393	94.0983	14.2725
		104366	235.908	3.3758	72.7433	3.1259	63.7758	13.2463				204335	1348.17	18.6361	259.602	13.1695	76.7623	12.9109				3050094	1046.09	14.5778	188.361	8.5612	71.2807	11.1156				404365	1424.48	20.1157	344.122	16.0084	416.229	84.9101				504456	1091.51	15.9257	136.849	6.2613	67.1179	9.3792
		104367	101.046	1.5627	31.6959	1.2904	31.8175	6.0661				204336	2308.26	31.0608	416.483	21.6141	113.027	29.2438				3050095	1264.64	18.0654	203.153	9.295	45.9262	5.6805				404366	1362.56	19.9204	491.715	23.1107	284.751	52.561				504457	777.057	12.3284	174.632	8.0054	51.2389	6.4406
		104368	168.863	2.534	56.47	2.4453	53.6188	8.3111				204337	549.835	8.2814	157.829	8.5289	192.05	49.1741				3050096	710.043	10.4643	120.672	5.4299	68.0263	8.6378				404367	1904.24	27.2441	611.684	29.0857	296.83	46.3352				504458	1362.29	20.1283	229.378	10.4615	56.5622	8.6533
		104369	192.451	3.0309	80.0944	3.4371	52.1947	8.6169				204338	996.685	14.1065	199.68	10.5818	164.181	40.1513				3050097	1128.41	15.9096	195.685	9.0912	60.3668	7.8585				404368	2728.72	38.3761	771.455	35.6243	266.024	47.1212				504459	778.527	11.9365	218.387	10.3542	75.8635	16.6223
		104370	331.171	5.0076	119.327	5.3215	13.7623	2.1836				204339	2030.09	28.0844	431.779	23.2885	149.831	28.5867				3050098	1232.15	17.1925	218.353	9.9411	60.5767	8.5265				404369	2231.75	33.9818	933.029	42.7266	312.938	53.4653				504460	946.596	14.1172	186.332	8.6097	81.9088	15.6018
		104371	373.346	5.7205	171.065	7.2996	65.8854	12.6654				204340	2005.91	27.3685	446.277	24.5465	208.267	49.547				3050099	1274.7	17.1437	153.256	6.8846	73.6647	10.092				404370	3261.4	46.188	832.228	38.6681	305.02	53.819				504461	1270.06	18.3201	165.741	7.5864	61.5645	8.5909
		104372	680.36	9.7546	210.194	9.0378	93.5336	17.531				204341	2042.82	27.5014	417.113	22.4996	201.959	52.3355				3050100	1841.96	24.2878	226.241	10.2422	91.8706	11.6875				404371	2428.72	33.2983	451.124	20.6305	401.952	75.9443				504462	1517.37	22.0229	204.152	9.4657	74.2381	10.4016
		104373	116.003	1.8331	43.1143	1.7986	29.067	5.7649				204342	1998.81	27.4057	418.108	22.5425	164.921	28.6521				3050101	1313.64	17.9127	186.071	8.2386	70.857	9.2313				404372	2567.47	34.9583	541.101	25.2527	219.249	30.5872				504463	846.3	13.1908	156.382	7.1938	61.1336	8.0645
		104374	94.2063	1.4733	43.4845	1.921	18.0332	3.2165				204343	2295.8	30.5372	416.988	22.5279	186.782	25.5482			N13	3050102	1324.75	18.3387	224.924	10.2853	68.4667	9.7725				404373	2486.44	35.056	723.76	34.046	339.733	48.5795				504464	1532.84	22.5735	344.118	16.2149	66.51	14.9432
		104375	219.625	3.2904	60.8974	2.4937	47.9298	10.2751				204344	2145.07	29.0069	422.819	22.9057	154.223	28.0753				3050103	985.087	13.9465	232.308	10.8683	68.5166	11.4136				404374	3617.82	50.6798	1109.15	53.0982	501.632	72.2497				504465	985.995	15.6756	339.51	16.365	65.1277	13.031
		104376	123.691	1.8835	41.6203	1.8947	13.8827	2.5385				204345	1802.63	24.4341	365.712	19.3313	162.463	31.1157				3050104	1201.89	16.8029	214.221	10.1052	70.4	9.1068		2007-09-14	N11	405001	2827.37	39.7856	834.357	38.9916	81.1139	11.2628				504466	1368.43	20.9716	275.445	12.7116	50.3231	5.8776
		104377	335.964	4.8629	97.4253	4.1569	46.7704	9.9794				204346	2527.26	35.4544	638.089	33.7741	141.598	31.1115				3050105	1309.08	18.2522	275.292	12.8678	68.2431	9.7836				405002	2210.68	31.4476	653.583	30.1768	106.062	13.6582				504467	964.148	14.86	194.106	8.8755	49.1155	6.2323
		104378	41.6675	0.6248	15.1021	0.6602	6.5623	0.9721				204347	2325.47	33.2775	683.114	34.774	144.756	22.2676				3050106	1935.82	26.6609	338.439	15.9599	100.171	14.7812				405003	2462.26	35.1152	746.464	34.3494	103.585	14.3377				504468	1037.16	15.9836	218.141	10.2114	93.0395	13.3371
		104379	234.023	3.6189	96.3137	4.146	23.5132	4.0246				204348	2556.32	36.02	705.238	35.7638	139.445	23.5735				3050107	1381.77	19.6676	224.499	10.2292	87.9876	12.3765				405004	3408.23	48.4795	955.204	44.7718	100.752	12.7313				504469	731.765	11.6064	172.383	8.0208	47.4526	7.4402
		104380	158.029	2.3749	40.9389	1.7682	33.1941	5.315				204349	2684.88	37.9229	737.393	36.9376	127.083	22.8665				3050108	1403.74	19.5194	253.383	11.8768	74.3779	10.1391				405005	2695.18	38.7134	684.652	31.636	53.5581	5.6411				504470	980.743	14.4269	122.769	5.6389	54.0181	8.0735
		104381	314.094	4.4793	63.4832	2.6276	84.9296	18.3312				204350	2717.31	38.0109	704.229	35.8027	131.226	25.3453				3050109	1728.33	24.0725	269.029	12.5755	77.1567	9.5206				405006	3411.18	48.0729	845.124	39.7203	106.43	14.9195				504471	1136.51	16.9024	215.743	10.0124	84.1559	15.3452
		104382	45.5803	0.6784	5.3597	0.2109	3.6366	0.7089				204351	1634.12	22.0358	292.324	14.8684	121.843	27.9212				3050110	1170.36	16.7233	203.209	9.1259	108.146	15.0383				405007	3908.15	55.2948	1024.01	48.1207	116.233	13.8726				504472	1575.6	23.0518	244.572	11.4089	71.7992	12.693
		104383	46.2636	0.686	8.95	0.3643	12.0729	2.674				204352	940.088	13.5003	211.116	10.9743	152.441	35.9734				3050111	1070.36	15.547	234.411	10.2455	81.9075	12.6634				405008	3540.32	50.2253	908.452	42.0392	154.922	23.6025				504473	1151.2	16.9629	173.217	7.885	85.4172	10.9808
		104384	235.769	3.4212	73.592	3.269	25.8063	4.516				204353	712.743	10.4635	150.466	7.8575	88.2873	16.2949				3050112	1690.36	23.9149	300.984	13.9974	62.8864	8.4523				405009	2761.24	39.3319	508.341	23.2137	220.107	33.9038				504474	1059.8	16.0434	166.789	7.7687	52.2377	6.7858
		104385	124.467	1.788	19.3016	0.7634	39.0211	8.9679				204354	894.121	12.9903	178.02	9.1458	192.121	56.6711				3050113	1667.88	23.6622	335.652	15.8555	46.3959	6.3632				405010	2595.44	36.0115	413.702	19.0131	203.944	29.6291				504475	1439.14	21.0463	245.065	11.4284	63.8677	9.6586
		104386	1616.66	22.3772	421.088	18.5626	139.924	24.6448				204355	2906.1	40.0192	693.33	34.8232	67.9576	15.1295				3050114	1429.06	20.9687	276.958	12.7077	48.299	5.5408				405011	2659.3	37.5877	477.255	22.0737	240.366	36.2822				504476	1239.07	18.1218	272.197	12.4989	110.322	25.1563
		104387	1180.92	16.494	305.819	13.3746	147.124	26.5267				204356	2741.48	38.9518	823.48	42.055	60.1133	7.8188				3050115	1024.84	14.3999	154.76	6.8127	120.703	21.4964				405012	2781.84	39.2946	632.865	28.6226	211.214	34.2188				504477	1059.92	16.2349	216.412	10.068	59.9429	9.097
		104388	1240.15	17.2479	287.421	12.6111	117.924	21.8036				204357	2528.89	35.7197	726.029	36.8452	78.6619	11.3512				3050116	1117.5	16.3006	236.013	10.7449	80.2764	12.3235				405013	2556.01	37.1534	640.564	29.542	148.363	18.1116				504478	857.606	13.1373	197.736	9.1256	76.9763	11.4063
		104389	1075.36	15.2636	308.404	13.2519	126.388	20.9498				204358	2453.98	35.2635	705.273	35.8788	7.7541	0.8808				3050117	1200.66	16.9109	268.142	12.2243	59.0693	10.2633				405014	1808.23	26.3353	445.959	20.5676	245.558	38.5127				504479	1109.42	17.7124	321.949	15.0131	80.6905	15.3783
		104390	729.55	10.0889	133.832	5.8446	97.1257	20.9082				204359	1065.56	15.3692	292.548	14.792	11.1633	3.223				3050118	1540.81	21.3037	214.612	9.8328	96.6931	16.0322				405015	1886.63	28.1978	748.966	34.6915	94.1039	10.4752				504480	1050.97	15.1294	234.256	11.1686	62.4565	15.995
		104391	903.669	12.8063	205.564	8.9345	169.201	31.2477				204360	756.07	10.7231	134.824	6.8868	193.602	44.3625				3050119	1131.71	15.8622	220.734	10.6187	84.7575	17.3123				405016	1173.86	16.7089	188.968	8.5219	326.883	62.772				504481	936.243	14.0107	241.496	11.3665	66.8627	15.797
		104392	1079.8	15.12	323.643	14.1592	114.12	19.679				204361	1112.3	15.6188	254.219	13.895	139.01	37.1199				3050120	1273.46	18.0745	274.132	12.5806	61.999	9.7118				405017	1573.77	22.3168	253.407	11.6884	440.82	79.0244				504482	846.519	12.4977	224.076	10.9366	59.8942	15.8595
		104393	1478.39	20.9899	396.333	17.2678	112.796	21.6758				204362	1560.01	21.4633	307.048	16.2367	140.529	31.8804				3050121	1638.6	22.9127	363.402	16.8428	71.9685	11.2282				405018	2550.31	35.8656	484.128	22.2802	329.986	56.4239				504483	985.91	14.5539	256.514	12.0215	104.384	22.1953
		104394	1233.44	17.2585	316.851	13.8031	101.365	17.0239				204363	1377.64	19.3174	309.632	16.4307	123.51	29.6863				3050122	1680.41	24.0934	302.994	14.357	67.8797	8.1097			N12	405019	3575	51.8125	559.894	26.2078	80.2766	8.4981				504484	813.514	13.8497	319.611	15.1519	52.9402	10.413
	V23	104395	2320.29	33.0149	502.423	23.7049	327.959	49.835				204364	887.583	12.1264	172.919	9.1213	214.632	56.968				3050123	1663.69	23.5525	300.374	14.1091	85.367	10.5774				405020	5278.93	75.7035	823.901	38.6984	111.996	12.8562				504485	1080.12	17.6207	365.214	17.2703	62.3431	8.5967
		104396	2244.14	32.3174	508.884	23.5576	326.027	54.3259				204365	1659.35	22.4572	332.61	17.6687	104.409	24.6415				3050124	1915.01	26.8202	348.719	16.3215	107.955	15.0207				405021	5140.69	74.031	722.079	33.7536	148.884	17.994				504486	668.713	10.8475	219.934	9.7881	49.0541	7.0111
		104397	2627.91	37.5888	531.267	24.8047	354.2	52.578				204366	2080.71	27.8063	404.931	21.6794	155.605	40.807				3050125	1971.22	28.3627	352.893	16.4383	86.303	10.1591				405022	4429.03	64.3427	635.062	29.7284	161.572	21.2159				504487	771.642	13.4786	423.451	20.8258	30.1167	4.9419
		104398	1889.46	26.6961	356.126	16.4879	236.098	40.9987				204367	1571.76	21.0549	247.694	12.2637	160.277	29.3607				3050126	1413.61	20.7105	300.367	13.9136	72.9519	9.3642				405023	4518.3	64.6523	527.042	24.7646	181.426	24.8608				504488	838.153	14.4049	376.337	17.6322	57.0577	6.9424
		104399	138.482	2.108	34.2564	1.5951	15.1326	2.178				204368	1197.28	17.029	273.651	14.0029	116.419	28.0624				3050127	1373.91	19.5404	262.408	11.9152	80.989	12.5747				405024	4103.57	57.422	347.209	16.15	193.712	27.8242				504489	895.437	14.3732	316.737	15.2353	59.1296	8.9907
		104400	134.766	2.0355	27.5948	1.2877	19.0058	2.7989				204369	1766.04	24.8278	438.254	21.8051	173.572	35.0289				3050128	1800.75	24.7835	334.112	15.6452	100.377	16.925				405025	3344.64	45.9737	215.957	9.9319	285.385	44.4159				504490	984.271	15.9563	335.037	16.0145	43.4361	7.5951
		104401	76.0178	1.126	7.9347	0.3612	12.1834	2.0432				204370	2167.21	29.9736	534.491	26.9919	132.86	24.3391				3050129	1202.34	16.6989	203.81	9.4959	94.7184	18.5302				405026	1486.14	23.5813	284.273	12.719	75.907	10.797				504491	414.635	7.3767	289.87	14.0747	42.7645	5.714
		104402	192.881	2.731	33.857	1.5696	44.6937	8.1235				204371	2321.25	31.8106	572.509	28.7172	129.487	25.3414				3050130	917.567	13.2233	192.008	8.9976	67.2131	10.9176				405027	3526.32	50.3323	373.432	17.0314	129.817	19.5801				504492	489.295	8.6205	276.184	13.4084	47.9312	7.1673
		104403	140.973	2.0939	41.0935	1.9632	11.957	1.6207				204372	2461.73	35.1318	677.938	34.5339	158.858	34.3497				3050131	842.823	12.116	150.56	7.1158	71.9912	13.1879				405028	2447.22	36.1231	404.249	18.7051	52.4185	6.0319				504493	421.921	7.5471	264.926	12.7843	61.8421	7.6915
		104404	169.949	2.568	42.0661	1.971	31.241	4.9983				204373	2730.98	37.6504	632.231	31.9218	131.805	25.961				3050132	1227.13	18.2177	255.05	12.1471	59.2425	7.1772				405029	4332.06	63.23	647.668	29.9938	125.586	17.436				504494	663.484	11.0602	284.79	13.7574	39.4099	5.9816
		104405	69.2233	1.0053	7.1014	0.3269	36.4078	6.7964			V32	204374	1141.69	15.4799	275.445	14.396	48.8473	10.9916				3050133	937.387	13.5605	185.058	8.5115	96.9423	15.6409				405030	1992.95	28.9072	177.275	7.8821	148.686	25.4099				504495	627.568	10.9747	333.584	16.0174	61.2856	7.5295
		104406	99.1348	1.5175	23.5834	1.1036	3.3232	0.3602		7.8644	total dry weight	204375	952.308	13.2474	248.664	12.3137	70.2834	16.7201				3050134	415.974	6.4196	79.927	3.8246	67.361	8.8404				405031	3499.88	51.2151	541.547	24.8795	66.556	9.333				504496	785.327	13.3781	406.493	19.643	63.0161	8.8912
		104407	428.243	6.2251	126.691	5.8975	46.7073	6.6039		2.6343	part1	204376	1144.22	15.4925	293.536	15.0065	55.6179	13.8845				3050135	1911.27	26.7941	325.406	15.6954	23.881	2.7783				405032	2350.71	34.8045	369.555	16.8388	102.725	16.7185				504497	654.504	11.4958	328.389	15.4775	29.1722	3.7865
		104408	91.0579	1.3784	17.3624	0.763	11.7466	1.3224		5.2301	part2	204377	945.785	12.7218	245.441	13.1062	51.7877	15.1729				3050136	853.61	12.9929	214.857	10.2475	46.7248	7.3824				405033	621.056	9.4326	82.0436	3.7681	67.1564	12.4127				504498	787.821	13.1251	253.444	12.2459	8.7185	0.8898
		104409	130.371	1.9091	22.7115	1.0537	26.1834	5.0652				204378	1129.87	15.6785	298.415	15.3897	43.7415	10.3978				3050137	803.777	12.2728	247.813	11.5346	77.4685	14.2947				405034	2771.15	40.4332	429.449	19.8887	70.5003	8.779				504499	943.304	15.63	263.191	12.4156	10.5939	1.1474
		104410	169.488	2.5163	36.9988	1.7374	8.0763	1.0519				204379	1170.57	15.8673	288.558	14.9277	56.5215	13.0267				3050138	455.852	7.0489	81.1263	3.622	92.3145	17.7783				405035	2794.75	40.5276	354.703	16.3202	98.678	14.8875				504500	1405.14	22.9241	392.127	18.5702	9.838	0.9714
		104411	141.311	2.0592	31.6127	1.4143	10.9093	1.6004				204380	1298.3	17.9264	342.715	17.5747	28.9856	5.0801				3050139	531.418	8.203	153.394	6.9153	72.2921	17.0929				405036	608.822	9.3732	75.1314	3.4044	62.5315	10.8622				504501	1731.29	27.8535	423.941	20.1488	16.0366	1.6468
		104412	128.262	1.9622	25.2428	1.1107	31.0319	5.3204				204381	1092.06	14.7199	260.978	13.3412	53.0442	13.8313				3050140	663.653	9.8076	118.627	5.5463	102.782	13.5464				405037	3372.38	49.5518	411.249	19.0018	285.794	50.5181				504502	2209.84	34.438	493.21	23.0564	22.8269	2.4304
		104413	220.041	3.1936	33.3398	1.47	80.1022	15.5461				204382	1345.3	18.0948	313.361	16.7463	48.8156	14.6642				3050141	618.545	9.6078	165.39	7.5535	75.8248	15.2202				405038	3296.21	47.2773	526.2	24.5579	120.237	18.6631				504503	2799.84	42.3649	564.953	26.778	31.2413	3.1213
		104414	417.544	5.9726	112.953	5.4401	56.5442	9.4734				204383	1183.26	16.2427	292.491	15.3268	59.7727	14.7371			N21	3050142	692.98	10.6364	180.517	8.0241	66.3371	12.3555				405039	3245.24	47.7083	518.897	23.8153	203.678	37.2052				504504	2630.92	40.4947	553.525	26.0226	28.2755	3.1401
		104415	617.987	8.8067	138.305	6.7332	65.2241	9.6177				204384	1076.24	14.8675	302.704	15.1483	33.3869	9.2944				3050143	1076.23	15.6872	254.361	11.6085	106.076	23.2777				405040	2632.13	37.9805	401.093	18.5212	123.86	21.6411				504505	3678.49	54.8602	743.068	34.9757	35.8196	3.8613
		104416	337.658	4.8895	66.7121	3.159	16.3813	3.2088				204385	1198.29	16.5051	283.741	14.1069	91.6567	22.1614				3050144	1069.04	15.429	256.222	11.6735	75.5329	17.5357				405041	2934.38	42.6545	630.134	29.7555	141.207	23.0658				504506	3513.25	51.9554	713.509	33.5761	48.8229	5.2327
		104417	67.0108	1.0314	15.9462	0.6998	19.7027	3.5818				204386	1381.59	19.8075	411.124	20.7757	3.4116	0.3634				3050145	659.861	9.9771	180.393	8.2915	61.4053	13.4297				405042	2437.44	35.5811	542.957	25.6664	105.412	18.6266				504507	1255.59	20.1796	349.053	16.5627	18.5741	1.9388
		104418	67.3263	0.9799	16.8075	0.7636	9.3839	1.5016				204387	1289.42	18.3147	378.283	19.5092	2.9614	0.307				3050146	1089.36	15.2908	146.042	6.5902	52.7574	5.8446			N13	405043	3279.28	47.1251	804.099	37.2334	12.1681	1.6643				504508	201.959	3.8054	147.89	7.2025	68.7354	18.2854
		104419	86.5022	1.3172	16.8014	0.7941	13.4051	2.7188				204388	973.527	13.4845	241.091	12.266	67.6138	15.4146				3050147	1134.91	16.4052	248.478	11.4928	80.4611	13.4868				405044	2976.15	42.9879	812.977	37.9085	83.2769	11.1476				504509	394.897	6.95	181.711	8.8643	51.1579	11.709
		104420	200.622	2.8288	33.1036	1.4949	18.1545	3.5399				204389	1221.04	16.2422	272.743	13.4896	76.4921	16.7377				3050148	1075.74	15.3942	210.546	9.429	85.7098	12.6184				405045	1856.84	25.9641	447.865	20.8674	81.2268	11.7322				504510	361.39	6.233	143.644	6.7234	108.643	18.729
		104421	67.6556	0.9993	19.5149	0.8911	24.9495	4.0944				204390	1111.99	15.1025	276.581	14.2779	69.6578	14.5031				3050149	1578.9	22.3053	285.617	12.8346	98.0789	14.5511				405046	2575.02	37.9544	610.285	27.8672	123.416	18.6245				504511	369.017	6.1767	135.576	6.3033	102.42	16.5301
		104422	276.379	3.8938	47.062	2.2417	30.9759	5.8639				204391	1269.1	16.7673	308.195	15.8692	59.3278	15.4482				3050150	1533.56	21.3934	270.332	12.6373	90.5403	14.208				405047	1763.78	26.4097	680.623	31.5424	76.8539	11.4115				504512	447.798	6.9852	142.277	6.8699	106.496	27.0248
		104423	180.502	2.6552	44.17	2.1706	26.8082	6.5611				204392	1198.46	16.8333	331.414	16.9103	58.7294	14.8835				3050151	924.057	13.1663	168.521	7.6245	92.8148	12.8488				405048	2521.34	35.7247	695.896	32.2817	159.543	29.7457				504513	571.249	9.0297	146.008	6.7436	78.4346	12.0448
		104424	124.008	1.8705	28.2977	1.223	31.4824	5.6256				204393	1545.45	21.1969	382.542	18.2157	85.0649	12.8292				3050152	1441.97	20.0917	231.128	10.5777	80.3526	11.875				405049	2047.57	29.4857	481.269	21.9242	180.212	31.8371				504514	1229.74	18.7061	259.023	12.0645	79.7873	10.9589
		104425	34.2989	0.5187	8.2232	0.4017	15.2936	3.208				204394	2732.99	37.079	663.946	32.854	82.5514	9.722				3050153	1456.65	20.0321	218.287	9.9241	68.1422	9.5369				405050	2384.93	33.5303	454.123	20.9955	153.154	31.1228				504515	1044.53	15.9958	227.794	10.6142	46.5649	5.807
		104426	177.839	2.5289	45.245	2.0815	53.1254	10.2652				204395	2069.25	28.1112	553.157	27.2285	82.6736	9.353				3050154	1225.08	16.9798	170.844	7.7894	56.8545	8.5786				405051	3348.27	46.8317	651.6	30.2529	114.69	16.3718				504516	625.859	10.5677	249.648	11.9781	84.4656	14.4951
		104427	54.4369	0.7974	16.1937	0.7401	24.2123	4.5308				204396	2009.74	27.5726	548.941	27.3439	71.3595	8.8504				3050155	1700.72	23.5373	294.712	13.8464	71.0665	11.1593				405052	2292.99	32.5377	599.253	27.9727	115.394	18.7387				504517	929.335	14.0118	170.781	7.8404	49.7915	6.2115
		104428	138.551	2.0327	40.1433	1.8365	21.1984	3.5984				204397	984.817	13.8679	220.048	9.9327	84.1402	11.5112				3050156	715.815	11.0907	191.004	8.5434	68.8559	13.4501				405053	1478.5	20.621	189.768	8.5269	141.933	25.935				504518	1358.67	20.1103	230.269	10.5542	40.3845	5.4491
		104429	41.6371	0.6129	5.4274	0.2258	9.0662	1.5096				204398	874.442	12.2321	236.297	10.9858	64.3646	8.0922				3050157	1299.77	17.9013	169.183	7.7461	78.1893	11.4008				405054	2523.5	35.2196	519.216	24.5228	176.599	32.5938				504519	1056.64	15.3755	178.947	8.3046	75.3203	11.4351
		104430	358.827	5.1197	75.9834	3.6106	26.4469	3.9855				204399	1229.19	17.5581	304.409	14.7083	5.5582	0.5008				3050158	1459.27	20.2971	261.191	11.9394	74.5449	11.6528				405055	2806.5	39.4157	574.023	26.8196	181.84	32.763				504520	709.593	10.9385	141.276	6.4864	61.3088	8.0994
		104431	289.933	4.1483	69.6584	3.32	58.5639	9.3663				204400	1369.11	19.9218	380.521	18.5286	3.7429	0.3183				3050159	1141.44	16.6469	201.105	8.7928	69.6899	8.8882				405056	3046.34	42.2824	562.321	26.4479	223.994	45.0952				504521	1578.9	23.1636	306.244	14.129	61.7782	9.5268
		104432	270.214	3.8922	70.2875	3.3715	61.8665	9.8274				204401	1589.11	22.6853	414.032	19.9424	9.8148	0.969				3050160	1285.11	18.2581	267.678	12.2199	65.6852	12.8392				405057	2055.67	28.6798	405.366	18.515	133.447	25.6577				504522	1062.55	16.0868	264.945	12.5713	39.6688	6.5039
		104433	60.4145	0.959	15.8118	0.7477	17.8419	1.8414				204402	829.942	12.0119	229.619	10.8463	94.1102	11.5078				3050161	781.792	11.3602	122.862	5.3728	99.1752	13.4252				405058	2015.96	27.9753	387.232	17.6292	244.153	56.293				504523	1235.9	18.0022	237.112	10.8676	73.0661	11.5265
		104434	121.64	1.771	20.3221	0.8785	98.7407	20.2345				204403	759.847	10.6765	187.408	8.9525	84.1496	10.5299				3050162	941.519	13.7871	204.333	9.173	88.6792	12.4038				405059	1953.34	27.1665	399.63	18.634	281.082	65.914				504524	661.14	10.114	164.071	7.4548	46.3888	6.6636
		104435	73.5713	1.129	15.172	0.6979	25.1521	4.1397				204404	819.447	11.5894	172.205	8.25	89.3587	10.0772				3050163	1313.24	18.4937	215.917	9.5811	87.6914	11.8255				405060	2881.96	41.245	996.786	46.7273	229.377	45.2757				504525	1147.42	16.9114	188.183	8.682	32.1523	4.0871
		104436	800.516	11.5561	206.331	9.5662	106.493	16.836				204405	720.856	10.4783	177.673	8.2555	98.2762	11.3287				3050164	1586.1	21.6921	200.157	9.0545	72.8529	8.6067				405061	2795.53	39.5831	1061.12	50.5655	320.077	33.3835				504526	765.534	11.8543	175.214	8.0322	47.294	6.2481
		104437	224.765	3.3509	41.1182	1.822	76.4984	15.4968				204406	452.927	6.8969	161.696	7.2938	90.4768	11.328				3050165	784.913	11.6973	149.368	6.7978	57.7526	7.6498				405062	2659.79	37.1005	973.757	46.7035	246.914	50.0528				504527	1162.88	17.4793	264.498	12.1202	61.7458	8.7378
		104438	526.496	7.5616	151.742	7.2159	47.1104	7.249				204407	2655.77	35.8253	755.289	39.1589	92.2735	13.166				3050166	1231.56	17.4424	198.036	9.1761	71.358	10.35				405063	2969.26	39.5861	275.443	12.5617	453.926	27.6766				504528	905.672	14.1853	199.628	9.2664	23.5262	3.2714
		104439	518.399	7.5594	145.482	6.8143	39.4829	5.4748				204408	2179.52	30.5112	752.139	38.2824	28.205	2.9156				3050167	932.363	13.5549	240.758	11.0314	93.8578	22.7804				405064	2400.34	32.5188	298.596	13.8853	431.606	34.2284				504529	1121.76	16.692	246.792	11.3286	72.2612	11.634
		104440	404.146	5.7478	93.8725	4.3545	65.5179	10.0438				204409	2803.95	38.0256	801.748	41.5359	21.9231	2.3574				3050168	1325.01	18.5845	229.112	10.3024	91.72	14.1939				405065	2551.14	33.9709	269.75	12.3879	390.119	58.6797				504530	1068.56	16.2938	218.964	10.1493	54.62	8.1603
		104441	308.083	4.4779	61.8272	2.8038	105.056	19.2403				204410	2390.91	33.1635	821.007	42.6276	12.4084	1.584				3050169	1235.69	17.6026	223.311	10.1493	78.415	9.5718			N21	405066	3192.62	42.1046	924.332	43.2656	243.284	31.9453				504531	1018.59	15.2887	215.042	9.8888	61.9634	9.0301
		104442	1092.82	15.7128	316.252	14.945	104.798	13.955				204411	2442.22	34.0198	862.29	44.6645	20.3763	2.2059				3050170	1213.66	17.1275	246.046	11.1739	96.3256	15.053		1.2441	total dry weight	405067	3126.73	41.5548	735.638	33.5933	283.447	43.9688				504532	718.339	10.8935	140.47	6.5556	74.1468	9.8084
		104443	115.976	1.7212	17.9975	0.7948	18.3062	2.1518				204412	2361.7	32.6492	800.266	41.9239	17.1181	1.8142				3050171	1800.59	25.1081	303.044	13.8934	124.896	19.5913		0.9987	part1	405068	1263.27	16.7841	211.607	9.3885	307.422	60.7082				504533	600.523	9.1896	119.796	5.5702	73.2368	9.8321
		104444	395.551	5.7202	99.7771	4.723	73.2206	12.4184				204413	2292.55	31.753	772.966	40.111	12.0694	1.2915				3050172	1789.78	24.6022	319.217	14.9189	103.076	17.0772		0.2454	part2	405069	1957.81	26.329	534.576	24.3339	165.866	26.3141				504534	866.798	13.0635	165.367	7.5457	60.3788	8.4878
		104445	150.02	2.2348	29.0841	1.2857	73.9768	15.7243				204414	2446.93	33.9957	869.165	44.548	7.4624	0.7806				3050173	1659.74	23.0965	453.563	32.1819	120.947	30.1392				405070	1751.63	23.6847	406.171	18.2145	260.935	47.4368				504535	1191.92	18.2272	261.154	12.0651	43.7918	5.8068
		104446	163.467	2.3582	34.9676	1.6353	43.6017	6.954				204415	2234.53	31.1631	829.876	42.4876	11.5729	1.2919				3050174	1588.86	21.9774	272.789	12.4688	86.0621	11.7059				405071	1372.32	18.637	369.07	16.8345	181.918	30.1906				504536	586.545	8.9603	109.85	5.0162	58.686	7.7717
		104447	97.8326	1.4613	26.5285	1.3209	28.6302	4.3643				204416	1280.59	18.1716	424.957	20.707	238.054	81.221				3050175	1466.5	20.7942	221.476	10.066	86.9281	11.2397				405072	1951.36	26.2557	551.452	25.3347	168.919	19.2875				504537	547.728	9.0169	185.197	8.661	66.017	9.6024
		104448	51.0273	0.7593	11.908	0.5825	9.7094	1.8599				204417	631.336	9.2937	189.708	9.1455	66.7885	7.2945				3050176	2012.65	27.8921	316.66	14.6803	82.6687	11.3809				405073	2521.94	33.6998	763.54	35.4219	172.583	21.4521				504538	428.478	6.9046	112.428	5.2611	52.0779	9.9309
		104449	45.8426	0.7109	9.3737	0.4062	21.8474	2.7195				204418	417.694	6.3299	132.072	6.5478	28.5211	3.6496				3050177	1457.56	20.3539	261.172	12.2846	55.1248	9.7534				405074	3047.04	41.2904	905.365	41.6158	320.647	44.5049				504539	1085.53	16.2126	191.444	8.7492	50.4419	7.5569
		104450	129.379	1.8837	23.6673	1.155	35.2264	6.0892				204419	838.646	12.2819	215.637	10.4209	8.5703	0.7642				3050178	1207.23	16.8643	217.827	9.8047	85.7102	14.4251				405075	2535.75	33.5678	477.553	21.4633	314.672	51.3879				504540	1143.04	17.002	191.1	9.088	46.9286	6.1724
		104451	64.1582	0.9614	7.6665	0.3356	26.7077	4.2539				204420	756.748	10.958	203.735	9.8207	9.6502	0.8483				3050179	1257.43	17.964	224.743	10.3821	72.2291	8.8748				405076	829.756	11.4151	159.987	7.1818	301.33	57.695				504541	1227.98	19.5297	314.774	14.6859	29.894	3.4302
		104452	284.405	4.1012	71.9592	3.2855	104.05	17.4754				204421	1626.52	22.8832	459.081	22.4336	15.7703	1.5385				3050180	1595.76	21.7803	237.932	11.0392	64.3005	8.8318				405077	2050.45	27.4137	498.373	22.7722	282.249	49.8921				504542	1366.5	20.2306	268.778	12.353	53.6018	9.0846
		104453	28.3361	0.4742	10.9793	0.5021	17.2619	2.5631				204422	696.613	10.0738	198.786	10.2509	46.8063	4.4842				3050181	855.384	12.3105	144.215	6.8102	48.4315	5.0692				405078	1405.13	19.3544	389.481	17.63	272.327	43.8254				504543	1128.68	16.9175	254.033	11.9256	44.3578	7.1762
		104454	12.0528	0.1826	1.7445	0.0755	4.9682	0.9494				204423	621.566	9.1676	228.891	12.1921	19.1874	1.8272				3050182	1046.16	14.8828	167.849	7.5759	88.6539	9.8198				405079	1800.99	24.3066	463.114	20.6698	255.255	44.106				504544	1554.44	22.6718	301.039	14.0521	42.0896	6.9621
		104455	179.711	2.5526	44.7972	2.0608	21.76	2.9661				204424	471.129	6.8682	120.427	6.113	75.564	12.0204				3050183	1770.04	24.4007	255.225	11.7127	60.9189	6.7643				405080	2772.63	36.43	579.092	26.1375	339.077	63.1035				504545	887.902	13.62	216.918	10.0781	64.2951	11.0944
		104456	86.3428	1.2759	15.323	0.6881	10.0779	1.4816				204425	905.35	12.7892	183.175	8.7123	127.165	23.1175				3050184	1657.03	22.7794	231.17	10.5071	79.626	10.6282				405081	715.525	10.3245	221.824	10.1373	104.671	17.5139				504546	403.428	6.3413	103.192	4.7824	52.6203	9.4404
		104457	101.626	1.4948	25.6212	1.2319	30.2151	4.3406				204426	1634.61	22.3606	382.419	19.1902	105.423	15.6318				3050185	1443.4	19.9344	266.04	12.4419	51.8039	8.114				405082	2737.28	36.8758	639.261	28.8762	439.868	73.0431				504547	1000.31	14.9752	178.122	8.2308	36.9947	4.849
		104458	225.238	3.1371	46.9869	2.3903	48.6322	7.8594				204427	1189.05	16.4423	318.026	16.2752	74.9833	12.4582				3050186	908.173	13.0882	219.314	10.0495	81.8101	13.4671				405083	1831.77	24.6637	620.064	29.0474	139.735	15.8552				504548	1205.68	17.9997	231.763	10.4942	48.9682	7.3193
		104459	145.263	2.2019	46.5896	2.2462	17.4288	2.6268				204428	911.658	12.4011	142.11	6.8503	118.446	19.9023				3050187	1504.63	20.8305	247.161	11.2669	45.8321	6.5325				405084	3363.82	44.5222	972.059	45.4007	227.532	25.662				504549	1704.57	24.9352	287.944	13.2721	49.6965	6.7736
		104460	131.899	1.9016	29.0137	1.4013	33.3494	5.4846				204429	755.009	10.9596	162.363	8.0271	83.7561	11.8152				3050188	1286.66	17.7297	255.415	11.565	93.3361	15.668				405085	5011.36	66.1434	1133.53	52.4614	430.701	55.7471		2007-09-09	W21	504550	573.896	9.3846	136.695	6.0294	60.3598	11.563
		104461	229.72	3.2624	34.7433	1.6345	42.2487	5.8306				204430	827.555	11.4098	124.612	5.9181	102.936	20.7631				3050189	1541.06	21.1687	263.58	12.2304	61.0059	9.8589				405086	4463.79	58.2645	801.385	36.977	469.853	68.9443				504551	1129.6	16.6615	216.796	9.8692	52.5085	9.6463
		104462	2510.5	35.0693	422.283	19.5923	314.923	53.2828				204431	930.896	12.9855	176.069	8.6905	101.617	16.1807				3050190	1255.81	17.4447	230.003	10.6109	65.8337	10.9593				405087	4091.89	54.7418	1226.43	56.8648	175.117	17.8031				504552	861.926	12.7811	234.477	10.7409	38.9069	7.4092
		104463	3037.94	41.9003	492.568	23.3474	330.283	54.3103				204432	632.052	9.0092	105.725	4.83	101.638	21.8866				3050191	1403.1	19.4435	248.723	11.4213	117.8	18.6829				405088	2004.33	41.8165	353.722	16.3585	144.886	28.6016				504553	772.926	12.2623	243.34	10.407	51.2764	7.9662
		104464	3225.07	44.6303	602.22	28.3925	258.221	41.7332				204433	1232.19	17.1694	322.502	16.386	25.1968	3.0218				3050192	1406.19	19.5573	218.59	9.7845	117.502	16.3008				405089	2120.89	28.9874	191.831	8.856	140.149	28.8554				504554	518.523	8.1505	338.384	15.2982	65.1632	12.3676
		104465	2673.89	36.9603	460.793	21.9461	328.132	55.9294				204434	1018.77	14.9179	323.073	16.1993	1.2772	0.131				3050193	826.578	11.909	149.777	6.6749	110.302	18.703				405090	2443.48	33.3955	243.537	11.612	210.265	43.0956				504555	1038	16.2122	310.555	14.6019	33.5921	6.4299
		104466	3083.42	42.8899	546.612	25.682	297.954	50.7927				204435	1109.22	15.3121	275.317	14.1338	41.7448	8.1913				3050194	1662.94	22.9457	229.434	10.4296	87.6835	12.6145				405091	2264.71	31.0624	230.319	10.7047	160.859	33.4945				504556	1030.11	15.4383	210.158	9.5787	44.1523	9.5232
		104467	3980.63	55.3155	713.343	33.7896	341.196	50.1408				204436	1142.84	16.1187	336.96	17.0922	7.123	1.4976				3050195	1212.91	17.2951	210.105	9.6449	84.4157	12.9596				405092	2768.98	53.3288	550.14	25.4166	149.774	25.0935				504557	630.526	9.6328	286.456	12.8073	71.6397	14.2046
		104468	2553.31	35.9465	468.563	21.708	327.361	57.29				204437	1225.34	17.4297	373.088	19.3601	8.2445	0.9442				3050196	1065.08	15.1865	179.651	8.0732	69.123	9.1096				405093	3304.24	46.0115	386.784	17.8665	191.368	35.6886				504558	495.101	7.978	256.703	13.0448	42.0193	9.5498
		104469	2829.74	39.4132	492.29	23.112	297.408	50.0558				204438	1665.62	23.9434	616.755	31.624	7.1191	0.7128				3050197	1605.09	22.5802	263.323	11.9426	108.374	16.5164				405094	3389.52	46.9974	367.734	16.8378	146.601	28.8433				504559	539.723	8.5603	350.174	17.2728	39.7399	8.8034
		104470	2685.24	37.4827	503.592	23.7976	295.829	46.5702				204439	1926.01	27.2128	621.998	31.6278	16.1965	2.1769				3050198	1242.85	17.4142	183.409	8.2171	89.1342	12.5465				405095	2979.56	41.2592	398.743	18.5885	98.0895	17.9372				504560	1134.65	17.3302	284.697	13.0237	39.3988	7.5958
		104471	3222.23	45.2193	608.847	28.6515	292.768	47.0619				204440	1973.29	27.9649	636.751	32.2818	14.3595	1.513				3050199	1172.8	16.7221	254.101	11.9074	44.3218	7.8013				405096	3684.9	52.8933	659.239	30.172	132.859	25.8509				504561	816.465	12.7118	284.694	12.8387	39.5321	6.973
		104472	3137.85	43.6526	572.997	26.9596	271.685	43.3474				204441	2099.2	29.5598	657.683	33.4237	13.198	1.4156				3050200	1362.2	19.1421	224.593	10.3978	51.5903	7.2603				405097	4285.01	61.421	799.515	37.2543	113.298	19.1225				504562	864.358	13.8817	197	8.8062	43.4267	7.5381
		104473	3103.3	42.7244	486.125	23.119	360.313	66.2348				204442	796.982	11.1187	127.784	6.2321	79.9399	12.806				3050201	653.151	9.2518	164.059	7.4835	104.04	17.8104				405098	3423.6	62.5895	847.56	39.5849	89.5718	14.8284				504563	1218.21	19.1438	269.274	11.8493	52.4415	9.9566
		104474	113.011	1.8278	27.7273	1.3332	53.1788	10.7321				204443	1122.79	15.3773	188.847	8.9144	110.121	18.0866				3050202	1054.83	14.5794	231.482	10.6196	104.011	18.1662				405099	4249.37	60.6287	664.468	30.4406	139.218	24.9496				504564	1194	17.4884	323.247	15.1013	44.4307	10.6819
		104475	956.984	14.5438	325.628	15.4187	34.5287	7.0478				204444	1222.27	16.702	213.109	10.2894	120.504	21.9391				3050203	907.671	12.771	140.714	6.2664	89.0592	15.3216				405100	3647.77	66.3445	908.254	42.5627	97.7643	14.3516				504565	527.632	8.4012	154.885	6.8554	52.1984	7.5798
		104476	1666.66	23.9843	505.51	24.0073	65.9332	10.7003				204445	912.731	13.1087	259.084	12.61	88.0093	16.3032				3050204	1137.59	16.1089	184.101	8.3975	40.3311	5.2962				405101	3878.55	54.7164	617.059	28.8575	85.847	14.5831				504566	971.055	14.7867	137.323	6.1358	49.1883	7.2992
		104477	1458.9	21.4551	475.318	22.9359	63.6353	10.3041				204446	664.256	9.7093	151.74	7.3371	87.6933	17.2556				3050205	1008.62	15.2342	227.968	10.5851	11.0252	1.272				405102	4541.4	65.7766	1075.56	50.4141	96.5304	15.3826				504567	874.095	13.7399	200.43	8.7659	54.3838	8.2379
		104478	2156.77	31.1876	669.319	32.1838	99.565	16.5545				204447	1165.54	16.2714	214.094	10.282	130.655	19.8101				3050206	1662.58	23.118	295.961	13.6781	87.5537	15.0485				405103	3980.43	57.1593	906.051	42.6389	91.9233	15.2496				504568	796.682	12.1867	154.723	7.1436	58.1516	9.0621
		104479	2085.73	30.0661	660.052	32.1827	39.4626	7.6448				204448	911.7	12.8704	156.45	7.3884	111.499	20.9862				3050207	1280.56	18.0095	241.374	11.2815	71.5976	12.6095			N22	405104	3673.49	53.7377	459.762	20.8072	491.444	84.0089				504569	1042.92	15.7434	291.375	13.5601	48.5821	9.639
		104480	2333.57	33.7074	791.495	38.5084	29.3738	5.8153				204449	2015.87	28.2396	634.788	32.5714	16.7137	2.1178				3050208	1065.23	15.74	234.368	10.568	69.282	9.9366		1.3161	total dry weight	405105	3145.85	46.148	600.724	27.852	142.297	24.9679				504570	822.475	12.6743	190.853	8.6962	48.3819	7.3291
		104481	2845.06	40.9864	862.309	42.4964	64.3969	11.4844				204450	1759	25.3806	635.292	31.9344	10.6913	1.0797				3050209	1044.01	14.9565	261.397	12.2017	80.7859	18.7659		0.6412	part1	405106	3106.17	44.6531	424.245	19.3557	214.945	33.6672				504571	1035.6	15.7373	281.848	13.1941	38.3581	7.7943
		104482	2287.51	33.151	677.001	32.5269	90.2863	14.8048				204451	2102.97	29.5942	764.133	38.4849	217.65	65.6598				3050210	994.547	14.344	195.843	9.0768	49.8437	9.248		0.6749	part2	405107	2746.21	41.2362	664.992	30.6809	64.3158	6.4024				504572	704.689	11.4136	184.735	8.472	49.664	9.0603
		104483	2111.38	30.0732	567.5	27.6727	53.1217	9.822				204452	2081.95	29.3614	799.864	40.5408	203.375	58.1457				3050211	1295.5	18.2385	257.17	11.944	56.5172	9.9322				405108	3733.57	54.435	737.668	33.9711	126.71	15.2169				504573	620.22	10.2216	234.787	10.458	44.8218	6.8212
		104484	2250.1	32.4742	682.624	33.2211	122.215	21.2983				204453	2274.8	31.8553	833.626	42.3399	169.035	42.9058				3050212	999.654	14.1841	249.027	11.7806	84.7565	16.7912				405109	4745.61	71.2509	1142.92	53.8217	259.411	34.3157				504574	1116	16.6876	254.172	11.7522	47.8507	9.4488
		104485	2447.01	35.1728	756.089	36.7832	54.1694	7.211				204454	2488.46	34.3943	841.26	43.5588	227.913	58.9667				3050213	922.824	13.6483	248.269	11.3792	99.7048	23.0866				405110	4334	63.8835	907.047	42.381	193.197	26.3131				504575	801.949	12.5656	152.899	6.8	50.7479	7.7716
		104486	2352.59	33.7777	556.704	26.649	51.9045	8.7578				204455	2386.78	33.0556	844.036	43.596	231.545	60.1168				3050214	1006.08	14.881	247.537	11.3616	71.9457	12.3155				405111	2739.04	39.4374	358.407	16.653	190.938	32.9382				504576	985.057	15.2133	171.949	7.7499	34.4377	4.5001
		104487	2602	37.657	722.833	34.7562	43.643	6.3486				204456	2620.33	36.4334	944.014	48.4085	215.239	59.1091				3050215	894.639	13.5847	228.985	10.2753	63.9581	11.0105				405112	3933.54	56.7041	582.234	26.8178	145.152	20.795				504577	1506.36	22.2936	180.386	8.0833	59.5096	7.9456
		104488	1775.37	25.2444	441.706	20.928	40.9674	6.6464				204457	2734.99	37.9921	983.845	50.3451	201.378	53.3071				3050216	787.469	12.0196	180.458	8.0716	45.5762	6.3096				405113	3174.13	44.8495	347.318	16.0926	223.055	38.891				504578	732.137	11.5086	127.378	5.5735	39.5979	6.2463
		104489	2126.02	32.0627	735.257	34.6613	70.7359	10.8742				204458	549.027	7.6531	86.8032	3.9721	123.835	23.7291				3050217	1472.31	20.6876	282.53	12.9008	76.6146	12.3341				405114	3164.18	45.3715	397.831	18.3073	207.669	36.4633				504579	506.761	8.315	305.124	14.5355	40.5756	8.4578
		104490	2890.72	41.7216	745.73	35.7167	75.7683	12.6101				204459	1049.1	14.2791	212.487	10.4018	123.696	22.9076				3050218	1320.83	18.9453	223.041	10.1362	90.3943	11.5504				405115	3774.15	54.3811	491.16	22.8502	295.403	46.1737				504580	830.981	13.0903	215.038	9.6218	39.7121	7.7993
		104491	3891.18	55.9609	1015	48.0249	84.9754	11.4626				204460	976.268	13.3447	164.287	7.8338	111.399	19.8717				3050219	1244.23	17.9146	288.009	13.1787	61.5169	10.2719				405116	2939.64	43.6722	517.522	23.8062	167.706	27.9401				504581	501.65	8.111	234.998	10.5199	43.1976	6.6294
		104492	3130.36	45.4667	665.985	31.0411	90.6442	17.0236				204461	2850.36	39.2292	940.012	48.1317	165.068	40.1931				3050220	773.506	11.6133	179.763	8.0771	70.8657	11.3747				405117	2811.59	42.1167	540.65	24.6678	110.718	14.9877				504582	686.073	11.1828	173.958	7.6743	50.3837	7.5463
		104493	3525.22	51.4067	843.192	39.8684	52.1581	11.4806				204462	2585.88	35.7114	872.779	44.9981	195.935	39.6681				3050221	1233.42	17.9479	274.834	12.444	54.2406	8.4795				405118	1796.54	25.762	201.563	9.0953	183.696	35.7955				504583	540.904	8.4064	108.377	4.6938	64.6249	7.7157
		104494	2701.49	40.2069	722.157	34.4862	85.9362	16.8901				204463	2223.65	30.8745	764.228	39.9483	227.271	55.8874				3050222	878.022	12.6431	175.803	7.9947	70.5061	12.1443				405119	2321.93	33.3919	332.665	15.5576	111.487	16.2161				504584	804.113	12.5748	257.859	11.9637	38.3915	6.6436
		104495	2364.19	34.108	501.357	23.3714	52.3195	9.7322				204464	1911.22	26.0324	566.846	29.7893	117.986	29.3793				3050223	740.941	10.9332	165.442	7.5509	87.7403	15.3618				405120	3295.62	48.2294	691.012	32.1017	93.9711	13.5822				504585	616.163	9.792	179.395	8.3443	45.5707	5.8141
		104496	2097.96	30.4771	442.28	20.6724	54.4464	12.3503				204465	2057.12	27.8905	582.287	29.627	122.576	33.9095				3050224	802.009	11.6414	161.685	7.5588	93.6438	17.3453				405121	3247.47	46.5633	457.743	21.314	241.13	44.0356				504586	672.587	10.6565	126.382	6.1234	32.9412	3.5462
		104497	2508.57	36.4273	476.403	22.3946	40.9352	8.5295				204466	2342.28	31.8126	677.146	34.4455	123.296	25.1833				3050225	662.987	9.7	151.492	6.9522	71.5052	10.3385				405122	2169.4	32.0236	420.769	19.5433	74.4547	9.1562				504587	634.471	10.3142	269.611	12.7008	42.4815	7.1703
		104498	2523.44	35.5661	428.779	20.7059	64.4588	11.9922				204467	2278.92	31.1835	733.989	37.6325	69.5136	15.5571				3050226	903.152	12.5951	176.973	8.3579	90.0087	16.1551				405123	2764.14	40.4359	508.413	23.4917	93.7088	11.7804				504588	723.528	11.6075	197.241	8.6935	67.3841	11.8773
		104499	2566.7	36.121	428.207	20.4936	54.0699	12.0026				204468	2037.06	27.8953	649.787	33.4566	143.013	37.7075				3050227	1131.55	16.0416	228.5	10.3331	78.9502	11.8385				405124	3880.03	56.2614	604.318	27.987	133.438	19.9842				504589	748.073	12.1546	223.644	9.9854	59.5433	11.4513
		104500	1516.12	21.4308	270.968	12.6875	116.825	19.2469				204469	2391.61	32.9741	674.721	34.374	149.201	33.7656				3050228	1119.59	15.8032	235.32	10.8538	50.8469	8.5426				405125	3223.73	46.709	542.745	25.0776	103.228	15.6847				504590	2877.71	44.6799	913.71	42.2375	130.815	15.9203
		104501	1425.28	20.1458	195.218	9.1003	147	27.3741				204470	652.704	9.0462	93.2016	4.3078	92.7317	17.8422				3050229	957.332	13.6008	182.879	8.4979	47.0074	7.4494				405126	2163.49	31.8038	315.16	14.247	200.716	37.0002				504591	1163.14	19.1941	485.396	22.297	45.2711	5.2473
		104502	1655.83	23.7231	287.316	13.7867	59.0417	12.5329				204471	1556.25	20.7098	217.445	10.4646	132.31	22.2183				3050230	911.248	13.394	186.194	8.3818	45.5289	6.0642				405127	3120.41	45.4838	512.929	23.4169	115.078	20.8738				504592	2888.4	43.9304	735.848	34.0862	141.335	19.2616
		104503	1517.01	21.0918	249.982	12.1543	129.927	22.4575				204472	1349.05	17.983	212.655	10.3984	120.554	17.7113				3050231	1233.83	17.1676	191.124	8.8259	69.6645	9.5018				405128	2650.09	39.0044	414.427	18.5659	222.73	42.6287				504593	3495.99	52.5065	935.159	43.8207	137.573	18.6427
		104504	1567.55	23.2458	318.809	15.1169	94.6172	16.9889				204473	1265.47	17.0092	213.121	10.5626	115.993	17.6579				3050232	1161.12	16.0574	200.323	9.2719	81.0966	12.293				405129	2627.02	38.4859	541.836	25.0792	79.5117	10.7024				504594	3075.61	46.6604	842.203	39.5209	132.964	18.3803
		104505	1201.65	17.2642	202.082	9.6176	114.774	19.6456				204474	1375.82	18.2328	213.604	10.8066	138.643	19.3945				3050233	1168.9	16.3056	224.448	10.0316	92.2698	14.9902			N23	405130	994.509	13.4651	123.11	5.5453	278.766	62.5272				504595	3832.78	57.2258	936.502	44.7532	169.212	22.9027
		104506	375.079	5.9388	84.8863	3.7996	104.482	21.4284				204475	1067.86	14.3316	159.216	7.8634	104.587	17.2765				3050234	832.26	12.5565	199.023	9.1088	36.6195	5.6301		1.2251	total dry weight	405131	2897.76	40.2044	438.849	20.2403	474.882	97.0636				504596	3746.89	55.5589	719.273	33.6853	179.129	29.8654
		104507	3710.28	54.6841	1035.7	49.5587	85.7498	11.7466				204476	1216.99	16.1225	173.424	9.0348	131.615	19.2687				3050235	1073.56	15.8336	257.346	11.9686	55.4051	8.0518		0.5243	part1	405132	3452.65	47.8491	555.19	25.5791	501.819	46.455				504597	3292.08	49.6411	782.542	36.4046	144.521	23.7978
	V31	104508	75.3511	1.1671	15.7035	0.8258	91.1641	29.4884				204477	1265.46	17.317	218.052	10.5206	116.997	18.8814				3050236	1340.05	18.8968	269.867	12.7554	52.856	9.134		0.7008	part2	405133	2847.92	39.6939	410.134	18.5384	464.976	58.5759				504598	3264.83	50.2888	844.415	39.2883	188.585	32.6001
7.7642	weight	104509	636.524	10.0478	272.791	15.2739	72.8968	19.6931				204478	1167.66	15.9993	199.964	9.5704	130.796	19.7077				3050237	835.803	12.2403	180.718	8.063	57.1199	9.7235				405134	3550.49	49.9668	646.665	29.983	402.698	50.5903				504599	3259.04	49.5604	740.699	34.117	155.131	25.7934
3.0206	part1	104510	1105.32	16.4258	359.03	18.9666	95.9615	27.025				204479	1255.15	17.099	306.174	16.1178	38.6645	12.8077				3050238	1144.29	16.3045	254.004	11.7359	52.496	9.0248				405135	3888.57	53.8464	753.645	35.1191	346.649	66.7037				504600	3395.32	50.2432	694.695	32.6511	139.341	22.4458
4.7436	part2	104511	1620.51	22.4069	408.906	21.9487	101.704	24.6983				204480	1524.37	20.6283	322.434	16.0478	64.0333	15.9244				3050239	1323.13	18.6773	267.428	12.2226	77.4106	13.0877				405136	3708.53	51.9028	776.148	36.1139	250.749	76.2472				504601	4059.46	61.8713	1127.01	52.9308	227.159	35.505
		104512	1054.07	15.2138	290.567	15.2775	100.813	23.8728				204481	1188.94	16.5613	338.652	16.6992	58.1501	9.526				3050240	823.261	11.9435	154.536	7.1185	59.4994	9.8891				405137	3768.43	52.9786	770.518	35.2889	354.859	48.1153				504602	3172.41	47.3818	629.505	28.9441	145.614	26.8569
		104513	633.399	9.4941	171.459	8.945	69.7999	20.9417				204482	1408.28	19.3068	369.565	18.5817	31.0735	8.9247				3050241	1104.2	15.622	200.297	9.5133	63.2532	12.6754				405138	4420.61	61.442	893.029	41.6957	202.539	64.6349				504603	2793.6	41.678	507.408	23.1584	160.148	28.5984
		104514	642.718	9.6204	245.451	13.8079	114.389	28.9162				204483	1381.07	18.2574	312.613	15.8322	95.3024	22.2776				3050242	992.404	14.2791	196.399	8.8409	33.1456	5.5232				405139	4315.74	60.0334	866.081	40.1752	352.848	65.2331				504604	3425.05	49.6764	549.723	25.817	171.401	30.5966
		104515	331.206	4.9957	113.375	5.593	120.112	38.1766				204484	1438.94	20.4703	421.786	21.9232	5.3262	0.5426				3050243	1325.61	18.6873	253.809	11.4789	45.4593	6.3433				405140	4388.49	61.4949	1012.95	47.1903	311.143	38.7893				504605	4958.07	73.4255	1018.2	48.0918	176.169	27.4993
		104516	305.263	4.4357	72.7664	3.704	116.234	39.4452				204485	1187.53	16.876	363.488	18.5286	10.8495	1.7809				3050244	1082.49	15.3256	210.792	9.8682	53.9463	8.8818				405141	3646.13	51.7809	1012.02	46.9011	339.571	25.9937				504606	2678.06	39.7281	401.031	18.1036	223.397	46.8209
		104517	1609.59	22.1717	417.732	23.0179	190.79	58.2106				204486	1084.9	15.1273	301.6	15.7588	44.2818	8.0236				3050245	650.153	9.7499	114.237	5.21	48.7279	7.5622				405142	3764.03	52.8467	970.437	45.3098	283.136	49.6426				504607	2983.01	44.6596	477.022	21.6305	261.419	55.0628
		104518	393.941	5.7635	85.0498	4.4105	128.606	37.5188				204487	1127.2	15.4862	260.447	13.2454	95.2979	17.4848				3050246	1250.51	18.2445	271.251	12.9212	63.8554	9.504				405143	3464.38	48.2163	894.209	41.6646	276.217	47.3778				504608	3275.69	47.8274	473.793	21.8287	249.559	49.3487
		104519	1837.78	25.0649	433.319	22.6164	135.09	36.6392				204488	1303.28	17.9515	348.608	18.4386	15.5432	3.4098				3050247	1042.94	15.2738	254.344	11.8249	47.0229	9.8907				405144	3597.39	50.2374	940.613	43.6976	215.034	42.0157				504609	5383.4	79.0923	1208.34	57.0477	76.7748	9.7203
		104520	456.542	7.0602	114.849	6.0825	93.9829	24.5231				204489	1137.15	16.3285	319.908	16.0701	9.4402	1.0073				3050248	751.127	11.1802	179.775	8.0964	55.3759	9.6774				405145	4389.87	60.9414	1204.52	56.621	194.623	28.6446				504610	4300.82	63.0216	967.275	45.7554	78.7349	9.8293
		104521	510.79	7.6199	172.604	9.633	110.496	34.3839				204490	1294.96	17.3802	322.238	16.363	60.1086	10.6266				3050249	636.338	8.9525	134.655	6.1561	75.7412	16.3604				405146	3753.86	52.3277	965.849	44.8028	209.041	35.3163				504611	4185.56	62.3555	966.544	45.3987	126.334	17.2508
		104522	678.134	9.48	176.689	9.2344	80.8667	23.4248				204491	1091.72	15.0465	302.05	16.0169	24.8268	4.3887				3050250	931.107	13.1161	169.136	7.8637	54.4451	9.3664			N31	405147	161.02	2.7084	87.453	4.0512	25.3721	4.9425				504612	4392.57	64.1932	903.207	42.6866	120.082	16.6049
		104523	1687.17	22.6873	372.558	19.8888	102.589	26.9717				204492	1217.96	16.556	278.293	14.0871	33.0019	6.0129				3050251	853.534	11.9651	178.178	8.4285	80.9854	16.7668				405148	803.891	13.1917	278.262	13.0137	46.2612	7.5352				504613	3990.26	59.3082	846.329	39.4416	193.477	31.6232
		104524	1666.09	22.9396	419.808	22.8801	85.3644	19.7656				204493	1336.95	19.4103	408.47	20.6176	3.1195	0.2992				3050252	618.123	9.1339	118.594	5.4723	46.8798	6.9227				405149	3146.04	45.624	656.786	31.369	312.687	40.4319				504614	3417.84	50.7498	638.986	29.7365	153.985	26.2911
		104525	1842.29	24.9321	433.644	23.9042	68.5125	17.3723			V33	204494	2190.96	31.472	678.461	37.5099	206.169	59.5607				3050253	893.801	12.8273	177.563	8.3244	54.575	9.9597				405150	3400.13	48.5154	652.74	31.1207	221.206	27.5187				504615	3135.88	46.3398	587.858	27.197	151.42	24.5606
		104526	2181.8	28.9782	443.482	23.6093	64.0435	15.298		7.1654	total dry weight	204495	1455.57	21.707	641.567	35.5385	231.656	70.9463				3050254	693.296	10.3206	164.671	7.5012	49.4184	9.0249				405151	3536.21	50.8555	766.842	36.7484	415.176	57.9275				504616	1796.42	25.8955	235.606	10.7487	311.409	52.1671
		104527	3647.84	48.7282	909.063	49.5044	113.965	18.705		2.23415	part1	204496	1887.13	27.0882	572.074	31.253	207.193	57.8683				3050255	1349.57	19.0114	248.243	11.729	44.327	8.543				405152	4264.93	61.2211	950.848	46.1619	649.04	92.0257				504617	1748.28	25.1927	227.188	10.4256	245.231	43.441
		104528	3177.84	42.5898	759.624	40.4102	101.634	16.3355		4.93125	part2	204497	2142.49	31.3875	829.1	46.2045	247.953	61.3097				3050256	1142.71	16.1977	203.255	9.2283	42.7644	7.3054				405153	3963.75	56.1018	707.811	34.1275	723.066	110.408				504618	3417	48.7405	473.355	22.6457	461.86	44.8833
		104529	3809.95	51.0496	878.539	48.2125	82.836	11.5813				204498	2230.68	32.6956	827.789	46.4622	187.294	44.6248				3050257	961.822	13.8788	191.749	8.952	57.0429	10.7686				405154	3733.11	53.832	811.954	39.5721	841.346	128.078				504619	601.16	10.3456	269.17	12.1779	10.7425	1.8798
		104530	1845.87	24.988	447.927	24.2116	111.599	32.9622				204499	1991.81	28.5171	625.378	34.8912	139.355	37.3374				3050258	1003.51	14.5211	213.156	9.7822	48.2181	8.9426				405155	2392.06	32.9648	334.605	15.7751	507.268	82.8881				504620	1463.17	23.4329	464.507	21.0557	29.7768	4.0537
		104531	1953.49	26.8139	486.743	25.8616	121.743	30.0834				204500	2200.39	31.4499	708.583	39.0539	131.75	32.8891				3050259	633.989	9.6544	182.192	8.3414	44.3847	8.4861				405156	3824.93	54.1326	629.764	29.4417	522.511	90.2628				504621	2626.49	40.1849	726.26	33.4349	50.6571	6.46
		104532	2455.88	32.6007	538.062	29.9203	98.272	20.3657				204501	2596.13	36.9279	895.476	50.5932	65.155	14.1341				3050260	895.085	13.0135	190.496	9.169	59.8613	10.1273				405157	3038.1	41.8883	450.812	21.3651	374.994	68.1521				504622	2556.35	38.1027	639.805	29.6185	61.8263	8.409
		104533	1845.97	24.7414	423.334	23.6031	82.7061	21.214				204502	2922.21	41.4736	916.592	50.8546	105.197	27.689				3050261	975.823	14.3408	228.848	10.5473	75.0641	15.1016				405158	1999.19	28.3951	256.505	11.5421	461.904	98.6147				504623	2710.16	41.083	811.367	37.6001	76.4602	10.9453
		104534	1837.85	24.6034	450.85	24.3898	60.2142	15.7316				204503	2949.04	42.1241	1041.75	59.5308	97.471	22.5529				3050262	860.688	12.9847	223.325	10.4884	70.8739	12.1768				405159	2316.69	32.4839	285.967	13.1201	425.13	81.2562				504624	3170.33	48.2035	953.673	44.1787	107.64	13.94
		104535	1972.15	26.8098	461.048	24.4329	51.6816	11.6987				204504	3005.77	42.5497	1047.84	60.0403	60.8637	11.8117				3050263	737.971	11.2634	225.554	10.7665	44.1789	7.7054				405160	3334.79	46.7918	446.839	20.7193	405.821	66.4355				504625	2438.37	37.5825	778.153	35.6111	109.937	18.3235
		104536	1002.97	14.375	286.565	14.97	108.315	32.3647				204505	3159.38	45.3375	1153.02	64.9151	90.1183	16.5824				3050264	1071.95	15.6971	236.79	11.0243	57.9906	8.1004				405161	3637.34	50.4757	497.83	23.135	347.094	62.4193				504626	3089.73	48.0962	1139.88	53.0669	207.52	35.1871
		104537	806.941	11.4389	252.271	14.4329	103.723	30.9175				204506	3363.93	48.0283	1201.51	67.9267	39.6603	6.6555				3050265	1340.62	18.9073	246.339	11.5653	53.1738	8.1323				405162	4006.37	56.52	586.798	27.0643	398.7	66.7903				504627	3126.14	48.6681	1417.96	67.4836	202.459	30.1365
		104538	1302.92	18.0801	322.029	17.3769	86.6199	21.2088				204507	3577.88	51.0676	1343.49	77.2781	29.1317	3.1364				3050266	799.073	12.0817	176.284	8.0612	49.95	6.5028				405163	4120.38	57.6676	640.969	29.7527	377.499	65.2326				504628	2941.91	44.6228	737.844	33.7966	141.966	24.3215
		104539	1516.07	20.7821	394.866	21.9357	103.662	30.4734				204508	3482.46	49.5652	1144.46	64.6453	35.1323	4.888				3050267	1235.32	17.7778	268.935	12.9422	68.7885	9.6645				405164	2705.62	38.2231	447.5	20.6521	212.234	34.735				504629	3415.97	50.9047	793.931	36.8612	140.208	24.1337
		104540	2107.11	28.1978	503.154	28.0725	99.3793	23.7513				204509	835.633	12.124	227.677	12.4955	243.077	69.9677				3050268	1024.83	14.5575	175.706	8.1742	45.935	6.163				405165	5005.05	71.0247	1135.94	52.8702	298.315	45.776				504630	3040.94	45.0947	715.705	33.5642	89.322	14.6508
		104541	1387.87	19.0239	342.361	18.8717	58.5593	16.7153				204510	1110.98	16.3147	310.172	16.9842	227.582	60.206				3050269	1087.42	15.9475	263.244	11.5628	81.3973	14.3043				405166	5217.17	74.1738	1200.28	56.1604	331.203	49.4719				504631	2937.95	44.084	612.585	28.0346	195.371	39.6171
		104542	1163.13	16.2591	232.511	12.3803	63.8901	13.2744				204511	2149.05	30.4018	658.094	34.5105	211.667	41.1316				3050270	1019.17	14.9066	229.482	10.6664	64.2974	11.7957				405167	4634.63	65.6322	1060.83	49.7342	237.429	37.4303				504632	2416.03	36.2179	521.168	24.2167	151.429	29.5816
		104543	2653.71	36.1521	677.077	36.3588	62.6484	12.4136				204512	2394.19	32.6853	513.087	26.8576	64.283	8.8703				3050271	827.312	12.089	177.064	8.1642	40.9796	6.4151				405168	4792.32	67.569	1100.61	51.8163	235.293	31.1516				504633	2168.85	31.623	278.67	12.5906	245.58	52.3005
		104544	2657.05	35.666	554.273	29.2774	76.3549	19.6362				204513	2711.81	37.0484	592.911	30.8413	40.3395	4.6738				3050272	1157.05	16.4773	228.082	10.1709	55.3344	10.6305				405169	3916.04	55.8011	930.802	43.3616	210.186	36.9189				504634	2789.75	40.4712	406.182	18.9167	223.153	38.8543
		104545	632.918	9.5092	210.046	11.5529	129.739	33.0187				204514	1990.83	27.3363	433.301	22.4089	93.0648	12.6242				3050273	1362.7	19.3712	291.402	13.4424	51.4496	9.3847				405170	4740.04	67.5826	1179.4	55.2526	331.603	52.1606				504635	3271.84	48.3211	603.78	27.7932	191.682	30.344
		104546	1147.29	16.198	265.743	14.3337	110.912	26.9602				204515	2070.76	28.6711	456.508	23.2954	124.93	20.5325				3050274	1443.04	20.2961	313.646	13.6938	44.1004	6.1062				405171	5147.56	74.113	1368.79	64.4413	447.334	71.9497				504636	2785.86	41.8186	706.612	33.6376	167.983	24.6302
		104547	2336.85	32.2484	574.63	31.5455	101.218	19.1949				204516	2536.76	36.9279	862.081	47.4085	84.0445	19.5931			N22	3050275	1535.76	20.5581	298.621	13.3764	49.0249	7.2445				405172	3787.64	52.1548	706.245	32.3052	286.048	48.4902				504637	2948.63	43.78	680.907	32.5334	123.967	17.5622
		104548	2309.01	31.4263	593.925	33.2496	140.694	33.2691				204517	2127.9	30.9101	749.321	41.149	83.3584	19.7063				3050276	727.631	10.9009	169.647	7.326	47.617	5.5253				405173	4783.81	66.2401	1001.76	47.0126	201.344	28.9816			w22	504638	802.108	12.7276	201.357	8.9977	43.2838	6.7466
		104549	2351.5	31.5788	555.112	30.477	136.433	35.1414				204518	2568.92	37.0387	794.211	45.1876	105.647	22.5729				3050277	1285.29	17.6699	189.233	8.3014	44.2257	4.9308				405174	4929.88	69.7235	1050.74	48.852	411.886	63.8138				504639	910.201	13.864	206.7	9.1466	38.6247	7.7323
		104550	2300.84	31.469	556.437	30.535	111.412	19.2389				204519	2803.97	39.1331	796.502	45.3522	97.2701	18.719				3050278	1296.46	17.8707	269.893	12.1488	35.3535	5.1844				405175	4115.5	57.649	834.995	38.9992	375.657	57.8136				504640	1284.37	19.4116	270.17	12.1151	40.2751	6.8944
		104551	2642.71	35.0648	554.946	30.5153	126.18	17.1547				204520	2202.45	30.0919	445.051	23.2314	111.463	13.9753				3050279	870.137	12.4197	241.101	8.6595	51.203	8.8898				405176	2726.6	37.2737	517.322	23.7632	158.592	23.9531				504641	1236.74	18.5999	222.244	10.1008	48.4729	8.2685
		104552	2469.2	33.3076	562.706	31.027	104.185	18.8516				204521	2561.33	35.5267	575.286	29.7519	103.465	11.181				3050280	1604.83	21.5111	290.312	12.7361	50.2314	7.8777				405177	3219.18	44.8518	652.373	30.2586	208.487	29.8465				504642	732.906	11.2647	229.128	11.051	33.5966	6.6971
		104553	2075.02	28.0568	486.706	26.1852	109.751	20.8931				204522	2149.48	29.9051	498.776	26.0686	76.2275	8.5665				3050281	673.181	9.6854	176.233	7.8233	71.3756	11.4745				405178	3541.68	49.3325	725.593	33.4162	205.91	28.6054				504643	1896.39	28.214	393.371	18.0719	34.564	5.6784
		104554	2832.87	37.61	559.225	30.1266	113.074	27.3013				204523	2652.17	36.717	622.807	32.1615	60.2156	5.9651				3050282	1386.71	18.0984	245.389	10.6777	72.182	13.6868				405179	2091.55	28.662	260.37	11.8641	579.745	118.586				504644	1769.18	27.3388	356.672	15.9132	45.768	6.1247
		104555	2072.92	28.6062	469.463	25.8	90.8725	18.232				204524	2152.49	30.1826	583.781	30.5999	128.756	32.3257				3050283	918.185	12.5104	161.89	7.1391	68.2889	10.9657				405180	2211.5	30.4736	300.661	13.8467	489.917	96.1357				504645	1138.77	17.6244	238.026	10.469	40.7402	5.7888
		104556	2128.45	28.9683	426.794	22.3424	96.5578	23.1985				204525	1653	23.3309	458.206	23.8207	152.049	36.5885				3050284	1216.49	16.2996	225.598	9.82	65.4639	10.7191				405181	1040.96	14.4331	142.998	6.7033	222.073	41.1387				504646	1536.63	23.4586	343.665	15.5699	33.6254	4.9943
		104557	1838.22	24.7864	343.954	17.3514	97.7205	23.0328				204526	788.587	11.3714	201.819	10.8915	242.077	66.7366				3050285	645.614	8.8056	142.506	6.2122	49.4383	9.2279				405182	3523.86	50.7314	740.253	34.0815	415.804	74.4401				504647	469.769	7.5675	136.866	6.2106	26.3969	4.8371
		104558	1931.65	25.8108	407.246	21.6024	94.2996	22.8124				204527	1566.91	22.3938	396.328	21.2028	250.274	61.7945				3050286	856.34	12.2516	194.502	8.6227	40.8408	5.2326				405183	3547.75	50.5482	592.175	26.9749	436.123	78.2946				504648	770.604	13.3109	267.106	12.2573	38.7076	4.128
		104559	1881.04	25.303	389.037	20.14	82.3108	18.7481				204528	1011.46	14.6388	294.235	16.3135	262.794	74.0782				3050287	979.062	14.1731	218.524	9.824	44.3427	4.4268				405184	4083.64	58.5668	738.675	33.7666	591.716	113.935				504649	670.55	11.9613	235.88	10.3402	12.4092	1.0592
		104560	1082.14	15.502	280.962	14.8653	102.981	24.1548				204529	1331.09	19.22	352.173	19.2062	275.567	73.526				3050288	1116.92	15.3969	201.731	9.0501	41.2353	4.535				405185	4005.92	57.1522	1085.34	50.5694	272.783	40.9708				504650	702.058	12.0772	205.834	8.8339	17.8044	1.5677
		104561	820.442	12.0148	200.247	10.6434	59.6422	10.9415				204530	1807.52	26.1624	502.297	27.5094	243.077	64.4184				3050289	1370.23	18.6809	212.359	9.344	43.6917	5.8867				405186	4303.81	60.6251	1092.91	50.922	288.498	41.8115				504651	745.562	12.6421	227.012	10.2451	24.1184	2.5338
		104562	1029.23	14.9163	236.917	12.3885	129.786	38.0526				204531	1247.24	17.5577	352.453	18.0479	146.923	41.1916				3050290	863.397	12.8587	242.458	10.5381	74.9019	12.6262				405187	4168.59	58.3174	1027.3	48.6889	231.488	34.9483				504652	463.276	8.5661	209.412	9.5706	15.2831	1.4541
		104563	870.317	12.313	179.429	9.3286	130.787	29.7878				204532	1900.84	26.418	454.013	23.496	164.36	40.0449				3050291	929.97	13.3697	234.612	10.4571	52.1706	7.3125				405188	4191.64	61.026	1098.9	50.0651	378.295	64.5588				504653	675.027	11.9377	223.145	10.1796	17.5473	1.6514
		104564	1280.37	17.9345	338.325	18.8216	93.9076	24.9247				204533	1347.2	19.4176	431.687	22.5775	115.69	30.6117				3050292	1035.09	14.8557	259.536	11.1793	79.0792	14.3532				405189	4375.69	63.1214	1150.91	53.0994	358.882	57.3046				504654	1018.27	17.5023	305.51	13.6268	25.5799	2.3406
		104565	1795.74	24.6456	408.633	21.9935	94.9335	21.4066				204534	2114.81	29.2615	456.798	23.8969	131.55	25.4948				3050293	1105.21	15.066	223.051	9.6469	83.1074	16.1304				405190	4025.2	57.2857	979.41	45.0593	281.137	45.2826				504655	496.987	9.1717	259.227	12.1623	32.1013	3.4393
		104566	1585.8	22.1815	412.072	22.2562	83.4369	19.9333				204535	2098.13	28.8454	455.753	24.0341	89.582	16.2769				3050294	1559.38	20.8866	218.829	9.1277	96.6707	14.3005				405191	4267.12	62.9516	1054.17	47.4483	577.175	109.066				504656	481.185	8.9376	265.714	12.0926	19.8817	1.7325
		104567	1021.7	13.9243	230.129	12.3553	144.994	38.252				204536	2126.23	29.819	561.39	29.1875	62.4888	6.7059				3050295	1432.91	19.5812	227.883	9.4872	94.5927	15.9208				405192	4008.16	56.4865	973.981	45.4944	129.519	15.4766				504657	384.375	7.1471	225.73	10.6049	4.114	0.3689
		104568	1910.09	25.7868	442.652	23.9332	70.5331	16.5459				204537	1848.88	25.5666	410.026	21.2347	100.833	13.4616				3050296	1690.66	23.1287	309.655	13.2571	80.9064	13.2517				405193	3844.54	55.9115	1071.37	48.952	288.999	48.3728				504658	924.946	14.3895	224.18	10.202	39.7144	6.8026
		104569	2395.12	31.929	538.899	29.3659	105.118	27.4004				204538	1947.21	27.0015	443.315	22.9255	69.2794	9.8636				3050297	2000.16	26.7131	334.347	14.4766	82.9808	14.2662				405194	3857.68	54.6679	972.067	45.2	203.48	29.7511				504659	480.836	8.7069	225.125	9.994	19.5022	1.7662
		104570	1809.26	24.1766	329.642	16.6118	108.275	19.7146				204539	2033.91	28.0467	460.294	23.7849	98.2601	12.9754				3050298	1557.04	20.602	283.094	12.2263	70.3263	11.3867				405195	3476.18	49.0858	837.039	38.9107	95.4553	12.1256				504660	419.817	7.8739	241.527	11.3071	14.6903	1.2596
		104571	1378.2	19.5538	364.187	18.9677	78.6463	18.8429				204540	1167.02	16.6559	279.055	13.8563	166.229	45.0004				3050299	690.638	9.6233	124.58	5.099	65.0417	10.1412				405196	4057.72	58.1832	1048.06	48.5274	248.596	33.1606				504661	300.378	6.0257	303.718	13.9466	6.8267	0.6848
		104572	2063.16	28.9183	549.175	29.1932	91.1938	18.5719				204541	1183.32	16.6391	256.964	13.0397	173.078	47.8556				3050300	806.365	11.3675	171.579	7.1476	52.4385	9.1737				405197	4071.13	58.3485	1103.06	50.8263	223.938	33.4324				504662	530.225	9.7193	291.436	13.4635	24.9129	2.3933
		104573	1942.37	27.1222	522.55	28.4262	99.7433	21.3527				204542	3268.02	47.4302	1026.76	57.1782	68.4188	10.0312				3050301	1092.84	15.1734	178.177	7.9396	38.0123	3.7179				405198	3997.75	58.0291	1161.4	53.6474	357.78	52.7896				504663	464.87	8.7313	277.744	12.6254	7.2236	0.6418
		104574	1640.87	22.9132	409.222	22.3896	66.4272	19.4369				204543	1662.47	24.5633	553.14	29.0991	240.65	70.4021				3050302	987.773	13.9434	153.929	6.7323	47.0451	4.7475			N32	405199	143.413	2.3048	29.6762	1.3656	148.741	17.9753				504664	573.241	10.6918	278.998	12.6608	6.4591	0.5438
		104575	5845.76	80.3475	1837.76	100.594	154.085	18.2433				204544	2197.51	32.1696	687.629	36.4339	205.852	52.7499				3050303	1191.13	16.191	169.143	7.5419	43.4429	4.5997		1.8378	total dry weight	405200	2317.67	35.4026	542.022	25.3138	103.974	12.3652				504665	508.471	9.5015	309.738	14.3863	11.3731	1.0306
		104576	2792.48	38.8438	706.873	35.9309	93.3258	14.6462				204545	2433.01	35.3698	749.98	40.4105	150.939	35.9098				3050304	969.803	13.6203	171.788	7.3872	45.199	5.1504		0.7856	part1	405201	2815.01	41.1643	435.067	20.2158	134.142	16.9143				504666	1002.67	18.663	567.202	26.0986	8.5068	0.7055
		104577	2388.98	33.4467	660.49	33.2998	102.355	17.3959				204546	2069.62	30.2035	675.236	36.3063	177.36	49.473				3050305	1067.87	14.85	189.631	8.5471	37.214	4.7982		1.0522	part2	405202	3400.23	50.2368	680.427	31.6145	86.1221	11.9464				504667	1442.44	25.3124	523.921	23.6827	8.1006	0.6861
		104578	2865.03	39.4122	644.198	32.7765	77.283	13.2696				204547	2078.72	29.9493	642.33	34.5167	84.298	20.7565				3050306	723.997	10.2687	111.37	4.8325	35.9039	3.7656				405203	2098.42	31.4487	417.371	19.4793	101.539	12.6692				504668	1034.3	18.7262	485.083	22.5461	10.7204	0.9363
		104579	1465.2	20.0169	276.443	13.6249	98.8331	18.7847				204548	1276.36	18.4388	342.514	17.5332	134.862	33.5719				3050307	1296.75	17.862	213.569	9.2013	34.3788	4.1341				405204	3368.27	49.4395	610.48	28.2592	107	14.5803				504669	1946.57	28.8456	495.649	22.4509	35.212	6.0479
		104580	2107.07	28.7058	402.873	19.8059	93.9466	15.4493				204549	1642.79	22.9913	379.61	19.7206	140.465	32.4659				3050308	1217.64	16.4951	177.048	7.5413	47.9349	5.6429				405205	3588.26	52.3366	599.791	27.7679	120.782	16.3174				504670	1494.11	26.097	681.392	31.8115	9.6953	0.8431
		104581	3352.24	46.5226	702.577	35.1941	116.397	16.3068				204550	1967.17	27.5022	447.731	23.0156	129.891	29.3765				3050309	1119.36	15.3985	202.243	8.7406	57.4583	7.9316				405206	3520.98	50.6552	515.758	23.7958	194.133	26.1228				504671	1377.6	24.0378	559.149	25.9302	2.6286	0.2132
		104582	2575.12	35.5992	513.38	25.593	96.8962	14.2882				204551	2125.32	29.4322	462.658	24.4029	110.214	24.3819				3050310	1048.28	14.7553	183.254	7.8956	41.2583	5.4049				405207	3946.5	57.0443	714.845	33.6782	159.989	20.0139				504672	1294.97	22.9976	580.739	26.6842	1.9239	0.1682
		104583	3236.48	43.7984	637.844	32.9197	94.5302	12.4328				204552	1512.78	21.2374	381.264	19.8639	175.318	35.6351				3050311	772.49	10.9501	154.192	6.3393	78.9425	10.6129				405208	3961.41	56.8127	554.919	25.6145	192.16	26.4067				504673	1382.18	24.2661	599.825	28.2962	5.8411	0.5442
		104584	2622.96	35.8978	528.726	27.1811	99.4946	15.7925				204553	2664.93	37.8623	764.354	41.5896	80.694	19.3106				3050312	1741.18	37.9559	336.923	94.1486	107.446	14.5953				405209	3689.23	52.9746	547.104	25.72	120.593	16.4667				504674	1680.85	29.0289	604.572	27.9368	7.6915	0.7379
	V32	104585	3140.21	41.1194	756.14	40.0759	88.3128	15.9885				204554	2433.29	34.9758	750.994	40.3814	58.9572	13.2657				3050313	858.129	11.8826	189.294	8.2995	79.7517	14.3051				405210	3457.14	50.6803	641.077	29.8555	179.298	23.0595				504675	1865.07	32.3843	893.236	41.6437	10.5273	0.9725
6.7715	weight	104586	1821.17	23.883	424.466	21.2043	88.8865	21.4141				204555	2520.02	36.8145	877.117	48.2133	62.677	11.8367				3050314	790.882	10.8529	148.694	6.2189	81.6181	15.2526				405211	3923.63	56.6508	655.704	31.0199	158.252	22.7015				504676	2375.41	40.2287	971.934	44.6765	6.3963	0.5676
2.3143	part1	104587	1624.59	21.9468	399.512	19.6225	109.966	25.9656				204556	1966.01	27.4945	459.099	23.9347	67.5724	12.3976				3050315	1500.11	20.1059	226.587	9.6403	66.2546	9.9942				405212	3440.92	50.0414	553.126	25.8584	181.265	26.3046				504677	2372.73	40.5771	956.113	43.8749	10.7425	1.0082
4.4572	part2	104588	2637.77	34.8318	724.119	37.1247	85.8405	18.2834				204557	2090.81	29.4372	560.268	29.6009	114.209	20.8548				3050316	1032.16	13.8631	202.195	8.6381	59.7983	9.3209				405213	2674.13	37.861	385.827	17.9323	189.123	30.136				504678	2130.58	36.6466	916.224	42.7124	9.2087	0.846
		104589	2784.04	36.4166	751.895	39.3335	87.7458	19.4333				204558	1950.12	27.9676	584.116	30.9926	94.9777	17.1849				3050317	1445.14	19.7182	217.702	9.4285	56.4212	8.8183				405214	2779.01	39.9266	379.705	17.8165	171.534	22.8216				504679	2905.44	47.7786	1089.94	50.2083	14.5455	1.394
		104590	2003.01	26.5775	604.259	30.8596	81.3361	16.4666				204559	2328.09	32.5393	575.692	29.7016	123.341	20.2739				3050318	1231.29	16.5092	224.371	9.6544	67.1208	11.9589				405215	2556.58	35.7571	291.495	13.7592	193.683	30.5246				504680	794.129	12.3847	154.549	7.0152	46.4063	6.8635
		104591	2001.71	26.5821	565.437	28.2688	110.513	25.3369				204560	2144.05	29.9942	497.881	25.6856	121.78	23.9761				3050319	1143.78	15.3646	214.183	9.3349	66.3142	10.7098				405216	4365.85	65.5949	1109.05	52.3789	154.614	22.7407				504681	2659.57	43.8478	964.036	44.9121	14.338	1.432
		104592	2119.41	27.6022	514.585	26.5614	79.8019	16.9171				204561	2226.33	31.1522	473.152	24.284	128.31	23.1842				3050320	1263.35	17.0121	190.918	8.1085	60.8705	9.1615				405217	4616.41	68.4919	1069.4	50.0308	161.268	23.6727				504682	1303.37	22.9772	622.596	28.7241	3.7659	0.3389
		104593	2655.32	34.388	652.732	34.3051	59.6764	11.0604				204562	1916.53	27.3	499.283	26.2626	87.2092	13.9133				3050321	1058.46	14.6302	221.864	9.3827	80.4887	14.4147				405218	4270.67	64.4008	1032.77	47.8727	47.7696	7.5364				504683	985.679	15.2217	218.633	10.0799	30.4175	4.7018
		104594	2119.46	27.6566	496.226	25.1702	68.1823	12.9448				204563	1781.31	25.2873	420.402	22.6829	311.668	82.4511				3050322	778.864	10.8451	172.482	7.2636	60.2356	10.4261				405219	3542.28	53.1499	864.524	40.3586	286.255	50.0966				504684	1429.18	22.0145	305.07	13.3266	44.8999	6.6471
		104595	2619.23	33.9047	673.209	34.904	50.8083	9.6778				204564	2621.61	37.1744	634.499	34.9929	150.432	35.7327				3050323	978.817	13.6279	178.271	7.2943	58.5385	9.1512				405220	4365.77	65.1546	900.638	41.5717	237.415	38.4629				504685	1741.26	26.1402	394.015	17.2007	52.0807	7.9395
		104596	1328.77	17.5012	321.084	15.9215	71.9422	14.7901				204565	2875.7	42.1136	918.723	51.4695	61.0476	8.2729				3050324	1493.54	20.1366	236.299	10.0335	74.103	11.771				405221	4454.88	65.2754	863.98	39.8573	235.406	39.5007				504686	1237.69	18.4828	217.596	9.9348	31.8341	4.0375
		104597	1430.09	18.5254	376.192	18.9086	67.4244	15.8078				204566	3162.01	45.6512	848.577	46.3216	116.772	19.8549				3050325	1350.04	18.2813	207.494	8.7427	84.5319	12.6749				405222	5125.99	75.1047	1043.95	48.6306	137.729	23.3001				504687	508.584	8.4182	104.068	4.567	31.0136	4.0844
		104598	2613.64	34.0089	624.516	32.981	50.7367	8.368				204567	2310.65	33.091	538.351	29.3376	160.58	39.0786				3050326	1469.05	20.3472	340.469	13.2143	67.5395	10.5866				405223	4264.22	62.6702	803.715	36.9847	313.299	66.9611				504688	1244.54	18.4678	181.907	8.0741	33.8854	5.0686
		104599	2257.27	29.4133	527.786	28.1097	48.1907	7.4561				204568	2947.38	42.9262	803.492	43.8851	81.491	15.2109				3050327	1428.09	19.2548	216.443	9.2106	79.5937	11.1685				405224	3293.51	48.4888	631.579	29.1017	248.385	46.0333				504689	1269.3	18.7436	270.092	11.697	52.7786	7.8816
		104600	1210.58	16.2363	267.014	13.7235	52.8426	8.6698		2009-09-14	V11	205001	443.369	6.6593	143.254	6.3156	169.57	25.9588				3050328	1756.41	19.6899	274.42	11.7332	61.1163	8.6236				405225	3962.9	58.3265	821.34	38.8768	230.762	43.3542				504690	1508.44	22.3034	255.189	11.2334	43.145	6.7779
		104601	1590.84	20.9517	376.24	18.9075	74.5461	13.735		1.8694	weight	205002	758.7	11.154	234.165	10.1467	329.76	53.152				3050329	1299.56	17.5747	229.418	9.6951	80.175	11.6863				405226	3154.95	46.1597	606.529	28.472	303.975	52.9581				504691	1225.85	18.0853	211.954	9.482	34.4775	6.559
		104602	1695.39	22.104	396.114	20.8689	64.3287	10.5149		0.6495	part1	205003	685.334	9.8406	208.352	9.0971	164.224	24.4482				3050330	1212.34	16.7772	263.608	11.4163	75.5239	12.5829				405227	3749.08	54.966	822.931	38.8636	281.702	57.3918				504692	1484.19	22.0111	281.632	12.7441	32.1202	6.9482
		104603	2293.35	30.2933	634.288	33.3385	42.6089	6.4719		1.2199	part2	205004	2058.64	28.4577	436.956	17.841	271.349	48.3146				3050331	1635.15	22.0772	263.976	11.4363	63.9055	9.0461				405228	3064.97	44.53	524.489	24.5245	318.882	62.0167				504693	1385.77	20.7779	242.596	10.9704	44.2839	6.2134
		104604	1552.96	20.6237	409.709	20.5097	55.7105	11.6712				205005	2036.35	28.097	497.84	20.9262	230.001	43.2477				3050332	1485.56	19.8032	250.496	10.349	98.9642	15.733				405229	2945.39	43.0999	584.852	27.4182	296.16	64.5201				504694	982.119	14.6	147.758	6.658	34.6696	4.62
		104605	2746.26	36.0762	711.096	36.9914	54.0644	8.8444				205006	2453.05	34.9946	712.082	30.1064	279.36	42.6643				3050333	1170.02	16.138	188.928	8.0689	47.2864	5.5136				405230	2804.43	40.9728	524.125	24.3451	440.8	90.2041				504695	4764.41	67.9725	455.423	20.637	468.037	92.7129
		104606	2079.3	27.3509	592.439	30.6574	54.1444	8.5087				205007	1459.63	20.3844	347.89	14.7223	131.577	23.9907				3050334	963.387	13.0486	188.281	8.126	69.6634	11.2386			N33	405231	2974.66	41.13	499.993	23.1991	157.32	20.6067				504696	4524.23	64.6061	490.785	22.4601	475.288	89.6634
		104607	2019.5	26.8269	587.924	30.7874	46.7346	8.0515				205008	958.27	13.2011	123.6	5.3675	79.5512	10.389				3050335	687.804	9.6995	153.813	6.4833	58.5403	8.3005		1.9874	total dry weight	405232	2710.57	36.5737	349.096	16.1898	130.704	18.2157				504697	4762.93	68.1013	481.536	22.267	638.612	120.722
		104608	989.599	13.4929	235.674	11.1835	55.1049	10.4721				205009	865.096	12.1138	140.462	5.9278	45.6945	7.6418				3050336	671.416	9.888	161.094	7.1993	76.8122	11.729		0.8258	part1	405233	1764.72	23.5777	181.488	8.3741	213.628	35.4601				504698	6032.36	88.2176	861.881	40.5103	602.733	105.86
		104609	878.689	11.9013	253.078	12.3692	42.1535	7.3617				205010	1247.88	16.9553	126.007	5.4985	88.9206	11.0404				3050337	719.187	10.1137	153.671	6.4921	80.7785	16.221		1.1616	part2	405234	3725.33	50.2175	538.771	25.4979	234.557	40.075				504699	6545.57	95.9676	959.797	45.0928	638.655	107.281
		104610	1235.16	17.0832	326.027	16.5605	3.6402	0.4556				205011	1548.93	21.2176	174.935	7.7626	70.991	8.0137				3050338	937.92	13.2395	243.423	10.0516	87.408	17.8349				405235	3657.02	48.9555	502.734	23.853	214.59	32.0319				504700	4603.37	65.1445	436.656	19.7545	280.787	50.0574
		104611	1375.76	19.383	407.544	20.862	2.4513	0.2895				205012	1214.8	16.5714	177.099	7.5308	58.0371	9.3977				3050339	1189.42	16.7859	264.327	11.4628	93.4149	15.8304				405236	4897.6	65.0637	656.285	31.2274	287.615	41.4319				504701	5058.11	70.8971	488.619	22.5774	347.74	61.8497
		104612	1596.82	22.0718	443.435	22.4538	6.4279	0.8815				205013	861.799	12.2655	127.347	5.4121	91.5556	15.7008				3050340	475.568	7.2919	129.848	5.7401	69.3843	12.8276				405237	3760.22	49.8751	505.731	24.303	301.253	52.9909				504702	7012.81	100.99	1200.27	57.16	401.565	63.0131
		104613	833.972	11.6871	245.926	12.2122	61.6345	10.4691				205014	956.866	13.3345	127.145	5.4335	66.6125	9.9369				3050341	487.972	7.3289	104.478	4.5791	47.4585	7.5544				405238	3897.73	51.7375	528.764	25.3978	298.993	51.519				504703	6252.93	90.2895	966.803	45.7022	348.703	56.8726
		104614	763.537	10.3878	200.717	10.0799	55.1111	9.5794				205015	1807.25	25.5258	429.534	18.1083	147.371	20.2666				3050342	1105.4	14.8107	175.745	7.4516	63.5473	11.4845				405239	405.925	7.0273	265.129	12.0626	138.075	23.5137				504704	5806.29	83.3592	884.415	41.8004	350.258	58.6664
		104615	823.426	11.276	184.434	9.289	58.5226	9.1676				205016	1445.87	20.8333	387.858	16.0468	207.029	37.875				3050343	423.565	6.3494	115.83	4.9462	66.2717	15.9299				405240	1133.26	17.8069	423.393	19.3663	396.514	85.245				504705	5354.95	77.5543	894.522	41.8751	326.561	51.8176
		104616	724.357	10.1949	190.29	9.2951	64.3628	10.3061				205017	1383.06	19.3139	342.742	14.4108	164.752	29.5138				3050344	816.186	11.5503	178.36	7.7631	48.213	7.7562				405241	1785.76	26.2372	666.777	31.1942	283.728	49.7715				504706	5509.31	78.5813	864.905	40.3665	255.127	40.5309
		104617	455.126	6.7104	173.179	8.2123	59.2549	10.3054				205018	1922.97	26.6428	423.363	17.538	226.24	42.7345				3050345	496.743	7.1287	121.574	5.2369	70.6366	14.8041				405242	1298.13	19.2292	448.138	21.145	183.657	31.6722				504707	6424.19	93.5527	1244.81	58.9273	444.171	68.1941
		104618	634.402	9.0423	203.181	10.2972	43.741	6.6361				205019	849.838	12.2111	143.084	6.3938	54.7425	7.7936				3050346	800.045	11.3911	172.458	7.495	31.7411	4.2681				405243	1895.36	27.5651	692.767	32.7146	367.037	77.1096				504708	6872.33	99.3745	1375.61	65.1757	432.716	65.2448
		104619	419.722	6.1588	141.451	7.3724	18.679	3.3201				205020	1158.34	16.3596	160.632	7.2029	38.986	3.4516				3050347	277.165	4.4562	93.4609	4.1153	50.2486	8.0213				405244	1682.03	24.7993	597.748	28.2241	362.016	79.2815				504709	6026.09	86.967	1125.3	53.1998	321.111	50.4686
		104620	842.719	11.9498	230.95	11.7333	5.6129	0.6952				205021	832.719	11.2116	130.424	5.6102	73.5035	9.8936				3050348	289.975	4.636	93.2971	3.9496	52.3163	10.4289				405245	1510.3	21.9339	655.601	30.91	334.327	59.9725				504710	6398.46	91.5197	1157.83	55.2281	269.444	38.9015
		104621	760.423	10.6616	218.204	11.0574	6.3201	0.7718				205022	996.116	13.5458	132.87	5.6118	64.1778	9.3752				3050349	834.575	11.874	187.662	8.4143	66.7306	9.2558				405246	1387.35	20.0024	545.107	25.8027	201.838	30.4208				504711	5616.65	80.7423	1200.77	57.3584	343.919	49.869
		104622	1634.42	22.2643	491.683	25.2587	10.3283	1.3996				205023	748.503	10.1803	77.7366	3.4356	47.67	4.9121				3050350	905.927	13.0902	216.474	9.4056	44.2393	7.4031				405247	1654.52	23.4317	521.576	24.0236	495.638	104.812				504712	6646.32	96.5001	1270.42	59.6483	405.166	60.872
		104623	699.996	9.8013	212.903	11.5418	30.6543	4.0794				205024	1176.85	16.2267	155.415	6.8334	65.2582	8.1325				3050351	1234.3	17.0842	256.943	11.2573	60.5296	10.8455				405248	1907.41	26.9	611.346	28.6643	351.772	58.743				504713	5455.38	78.7487	1084.63	51.1313	385.521	54.1514
		104624	624.584	8.9197	245.146	13.7274	12.5662	1.6623				205025	647.586	9.4767	78.0046	3.4118	76.9228	9.2452				3050352	1210.86	16.5801	229.256	10.0122	46.1806	6.2221				405249	1602.9	22.6821	488.999	22.7469	334.221	53.4417				504714	3220.97	46.3444	680.107	31.9985	298.432	41.5196
		104625	435.401	6.0737	124.067	7.2499	60.1208	8.5888				205026	615.483	8.8911	78.7566	3.3868	96.1806	11.9412				3050353	1098.27	15.3089	230.367	9.7585	53.5989	9.1033				405250	1303.53	18.6203	389.418	18.1421	330.719	55.9481			w23	504715	1384.18	30.7441	387.693	17.2472	34.6294	5.2522
		104626	554.148	7.7082	168.562	8.8949	74.2191	11.6329				205027	1530.56	21.6582	349.855	14.4252	227.416	40.9318				3050354	792.076	11.4681	207.428	8.9371	48.8786	8.585				405251	1960.08	28.1105	579.93	26.9121	168.423	25.9106				504716	1090.1	24.1013	409.405	18.7938	40.6581	7.8499
		104627	397.818	5.7024	169.967	9.3572	50.2794	7.0362				205028	1707.1	24.0883	431.593	18.2078	115.583	15.3418				3050355	1200.29	16.5758	226.125	9.8514	37.55	5.7155				405252	2803.06	39.5231	696.544	32.3871	161.439	25.0766				504717	770.274	17.5432	238.179	10.6884	37.3539	6.1313
		104628	464.555	6.7041	173.676	9.3092	55.6409	7.8336				205029	1622.39	23.4737	473.807	20.5247	36.787	3.4143				3050356	810.666	11.6548	183.808	7.6955	62.5358	11.0326				405253	3904.6	55.343	888.4	41.4364	125.751	16.9896				504718	582.951	13.2158	170.791	7.4992	21.7323	3.0282
		104629	546.995	7.7776	208.354	11.9196	53.442	7.1242				205030	1472.17	20.8681	393.009	16.7296	90.0636	11.5774				3050357	633.397	9.7812	190.387	8.5941	18.5867	3.3282				405254	3418.43	46.4552	613.581	28.7242	343.865	53.7739				504719	597.058	13.9559	241.197	11.2016	27.3578	4.9648
		104630	577.099	8.024	177.733	10.34	41.5452	5.4995				205031	1108.09	15.3609	186.907	7.8703	57.6944	11.0069				3050358	463.014	6.9836	101.039	4.3517	74.2519	11.2574				405255	3442.81	48.1196	796.627	37.5031	312.044	51.2598				504720	882.07	19.8151	320.453	14.4012	22.2155	3.3288
		104631	490.804	6.9463	160.587	8.7251	52.4169	7.4734				205032	1055.32	14.8389	143.168	6.3889	58.9114	7.3706				3050359	519.204	7.77	105.166	4.4529	113.514	22.4551				405256	3317.4	45.6496	634.599	29.286	337.314	49.2493				504721	637.161	15.065	250.352	11.0194	27.9298	4.3261
		104632	617.963	8.9264	234.063	13.0194	24.633	3.1076				205033	1176.65	15.9313	156.183	6.6983	91.402	15.7487				3050360	733.941	11.006	183.496	7.8203	153.6	35.7386				405257	3491.38	48.013	636.205	29.6233	247.11	35.7515				504722	849.76	20.3321	372.22	16.8552	23.2979	3.6698
		104633	801.595	11.495	267.288	13.2632	0.6614	0.0796				205034	1359.69	18.5069	169.603	7.5064	86.2287	19.2944				3050361	1054.06	15.1044	269.796	11.9638	105.109	17.9019				405258	2087.39	29.0148	450.737	20.9806	321.262	50.6439				504723	776.35	17.5783	246.274	10.9463	35.8735	5.7353
		104634	835.706	11.4395	196.399	10.5758	81.732	17.898				205035	1407.61	18.8149	176.773	23.6371	107.495	17.0548				3050362	841.077	12.1527	236.383	10.2034	102.274	20.3095				405259	3697.83	50.6424	654.724	30.3671	30.9895	3.4653				504724	766.524	18.272	248.826	11.0532	32.7826	3.9059
		104635	326.098	4.6754	73.9141	3.6588	33.0741	8.8039				205036	884.269	12.6502	134.825	5.9825	92.1446	11.5697				3050363	1395.42	19.3977	277.087	11.7643	135.573	25.2605				405260	3499.55	49.2773	739.378	33.9027	72.1186	9.3364				504725	886.795	20.1755	241.319	10.8623	28.0843	3.351
		104636	873.264	11.8074	152.294	7.4456	98.672	20.9996				205037	1139.4	15.9138	173.959	7.6628	71.7268	9.2048				3050364	1430.93	19.6297	254.107	10.853	103.154	18.3058				405261	4038.62	56.0488	793.132	36.7097	85.2209	10.8982				504726	850.882	19.569	231.274	10.3804	29.2066	3.9114
		104637	1175.61	15.5806	190.72	9.4973	120.993	26.3999				205038	865.096	12.1138	140.462	5.9278	65.0447	10.4819				3050365	1528.88	20.7735	303.874	13.4131	93.67	14.6542				405262	2930.76	39.8747	549.297	25.7425	74.4827	8.7596				504727	976.82	21.8326	279.596	12.7625	27.3724	3.767
		104638	1263.5	16.7958	206.842	10.2473	122.319	28.2117				205039	1195.61	16.5187	151.804	6.5388	66.8915	10.6139				3050366	1272.41	17.3422	252.938	11.3747	75.9969	14.1023				405263	2788.57	39.4076	518.084	23.7952	120.941	16.6724				504728	802.551	17.9228	229.5	10.3543	24.5463	2.8494
		104639	473.417	6.6824	128.979	6.8829	49.4882	10.9354				205040	630.561	9.0421	85.9901	3.7521	34.8697	5.1386				3050367	1177.44	16.4077	217.93	9.4974	92.7791	13.4073				405264	3317.95	45.0623	523.04	24.6542	72.2517	8.9542				504729	1218.19	27.2605	389.017	17.9131	30.9986	5.0306
		104640	909.746	12.4433	196.183	9.8095	83.2829	21.0307				205041	992.148	13.9983	128.663	5.4617	46.1925	6.0112				3050368	1539.39	21.1429	312.623	13.7926	64.9967	8.7928				405265	3697.89	50.5767	654.229	30.9099	150.536	22.662				504730	1144.11	25.671	442.11	20.3642	26.2937	4.9767
		104641	1642.55	21.7558	409.577	21.6069	69.0433	14.2208				205042	1186.91	16.5906	165.582	7.6606	53.8204	8.0653				3050369	637.755	9.0862	136.387	5.8739	92.5061	19.4296				405266	4242.36	58.4327	812.88	38.3592	129.542	16.743				504731	731.878	17.0086	242.127	10.6069	29.3786	3.2925
		104642	1194.82	15.9976	340.611	18.3248	49.1079	11.3337				205043	830.102	11.7455	116.399	5.1004	21.6345	4.2152				3050370	1056.3	14.7578	195.81	8.57	87.1078	13.4202				405267	3251.06	43.9921	471.463	21.8104	142.053	20.4894				504732	883.767	19.5929	218.289	10.1608	35.7419	4.0064
		104643	916.085	12.0657	152.202	7.713	77.5726	18.1058				205044	1151.65	15.5232	161.56	7.4252	35.4782	5.7857				3050371	1785.45	23.7621	299.28	13.1271	83.5788	14.0645		2007-09-27	N11	406001	625.209	8.8215	114.415	5.1144	43.2499	8.6323				504733	1148.61	25.4749	337.147	14.9169	35.7926	6.7858
		104644	758.676	10.6632	173.893	9.038	54.8534	10.7487				205045	1037.5	14.0284	136.575	5.9347	53.0655	9.9991				3050372	1019.6	14.1951	231.716	10.3446	45.3033	7.2796				406002	955.757	13.9203	274.646	12.4981	85.7393	13.2061				504734	1266.48	28.5051	587.572	26.7978	30.2303	5.6213
		104645	831.574	11.1012	133.461	6.6634	67.4146	18.8889				205046	1343.88	19.1692	317.108	13.5814	26.3792	2.5761				3050373	966.516	13.5056	199.231	8.786	60.6323	10.4304				406003	1964.14	26.9332	334.551	15.6244	217.615	35.5134				504735	999.06	22.5472	317.318	14.5314	32.8936	5.2336
		104646	935.417	12.6344	188.572	9.7849	66.5509	14.7201				205047	885.134	12.979	216.757	9.14	3.419	0.3373				3050374	941.735	13.0749	141.319	5.9916	90.0727	15.4436				406004	424.043	6.2945	121.723	5.3373	112.056	15.5623				504736	831.128	18.8922	305.889	13.8625	33.8835	5.3596
		104647	635.122	8.7656	113.233	5.4382	66.5649	19.911				205048	1482.58	21.6737	339.374	13.909	284.586	63.4505				3050375	1080.89	14.8678	198.421	8.4836	61.1544	9.2226				406005	1026.52	15.2776	318.783	14.5277	37.4687	7.878				504737	822.61	18.0889	288.582	13.2317	24.6388	4.6521
		104648	800.852	10.818	136.858	7.0169	52.3541	11.65				205049	1654.21	23.5233	367.343	15.513	152.993	28.777				3050376	1762.03	23.7596	302.577	13.2992	68.8034	9.6139				406006	1877.9	26.3316	360.031	16.373	183.124	29.6486				504738	1086.87	23.7613	359.682	16.6034	49.96	7.8174
		104649	1128.24	14.9615	202.258	10.0371	72.1205	16.454				205050	1625.8	23.074	366.195	15.6007	186.298	36.6348				3050377	1042.94	14.2377	168.451	7.1626	70.6647	14.0171				406007	1689.64	23.3861	333.27	15.71	149.085	26.2511				504739	836.38	19.1944	394.184	18.1854	30.0862	5.9219
		104650	1228.21	16.2503	228.244	11.5851	78.9205	19.9588				205051	933.289	13.8839	275.414	11.7768	85.4392	15.3634				3050378	1107.7	15.5708	236.046	10.04	88.6524	13.9732				406008	1096.94	15.3342	226.296	10.2528	171.817	34.5754				504740	1226.62	27.6897	499.962	22.0562	41.9093	7.8948
		104651	917.163	12.7542	277.483	14.198	57.6389	14.8315			V12	205052	1251.24	17.5643	355.836	15.0409	167.838	30.151				3050379	1475.09	20.0773	249.131	10.9371	71.1279	10.4098				406009	589.922	8.485	168.346	8.182	55.2662	10.8615				504741	710.045	16.5899	287.33	13.1438	20.6998	3.7164
		104652	667.482	9.4468	162.516	8.261	57.4319	15.698		1.7014	total dry weight	205053	1183.93	17.3157	459.482	19.9039	151.114	26.2113				3050380	885.26	12.2879	206.443	8.7035	69.0738	12.4879				406010	1150.3	16.5211	327.228	15.147	86.3991	11.9886				504742	797.857	17.6265	285.892	13.3882	24.576	5.8163
		104653	1171.2	15.8314	229.298	11.5768	85.5684	18.0219		0.5982	part1	205054	694.984	9.7966	107.017	4.7793	120.768	16.2233				3050381	983.442	13.7095	188.707	7.9332	53.4278	8.6556				406011	1107.98	16.0015	375.988	17.6394	118.273	18.924				504743	732.259	17.035	296.701	13.3416	27.6318	5.5723
[truncated: 2,843 more rows]
[truncated: 9 more columns]
